# Supplementary material for: Transfer of environmental signals from the surface to the underground at Ascunsă Cave, Romania
Source: Copernicus journal article supplement (doi:10.5194/hess-21-5357-2017), 2017-10-26
Supplement: Supplementary file 1 [file hess-21-5357-2017-supplement.zip]

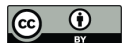

*Supplement of*

**Transfer of environmental signals from the surface to the underground at  
Ascunsă Cave, Romania**

**Virgil Drăgușin et al.**

*Correspondence to:* Virgil Drăgușin (virgil.dragusin@iser.ro)

- [hess-21-5357-2017-supplement-title-page.pdf](#)
- [Dragusin et al. - data tables\\_Sep17.xlsx](#)

The copyright of individual parts of the supplement might differ from the CC BY 3.0 License.
