# Supplementary material for: Transfer of environmental signals from the surface to the underground at Ascunsă Cave, Romania
Source: Copernicus journal article supplement (doi:10.5194/hess-21-5357-2017), 2017-10-26
Supplement: Supplementary file 2 [file hess-21-5357-2017-supplement.zip]

Archive with 2 entries (2 files):
- Dragusin et al. - data tables_Sep17.xlsx
- hess-21-5357-2017-supplement-title-page.pdf
