# Supplementary material for: Transfer of environmental signals from the surface to the underground at Ascunsă Cave, Romania
Source: Copernicus journal article supplement (doi:10.5194/hess-21-5357-2017), 2017-10-26
Supplement: Supplementary file 2 [file hess-21-5357-2017-supplement.zip › Dragusin et al. - data tables_Sep17.xlsx]

## Sheet: fig04.
Isverna Date	Isverna T		Drobeta Date	Drobeta T		Ascunsa Date	Ascunsa T
2015-02-06 00:11:00	7.98861		2006-01-01	2.1		2014-12-14 06:39:00	0.85881
2015-02-06 00:21:00	7.15391		2006-01-02	3.2		2014-12-14 06:49:00	0.8555
2015-02-06 00:31:00	6.3564		2006-01-03	4.9		2014-12-14 06:59:00	0.82901
2015-02-06 00:41:00	6.01664		2006-01-04	4.4		2014-12-14 07:09:00	0.84557
2015-02-06 00:51:00	5.69411		2006-01-05	2.6		2014-12-14 07:19:00	0.88362
2015-02-06 01:01:00	5.50837		2006-01-06	0.2		2014-12-14 07:29:00	0.92331
2015-02-06 01:11:00	5.1154		2006-01-07	-1.1		2014-12-14 07:39:00	0.95306
2015-02-06 01:21:00	5.14186		2006-01-08	-2.1		2014-12-14 07:49:00	0.93819
2015-02-06 01:31:00	5.20254		2006-01-09	-5		2014-12-14 07:59:00	0.94149
2015-02-06 01:41:00	5.14653		2006-01-10	-1.6		2014-12-14 08:09:00	0.92331
2015-02-06 01:51:00	5.02193		2006-01-11	-0.4		2014-12-14 08:19:00	0.93488
2015-02-06 02:01:00	4.87371		2006-01-12	-1.5		2014-12-14 08:29:00	0.93488
2015-02-06 02:11:00	5.01569		2006-01-13	-3		2014-12-14 08:39:00	0.92662
2015-02-06 02:21:00	5.0266		2006-01-14	-5		2014-12-14 08:49:00	0.92331
2015-02-06 02:31:00	5.07802		2006-01-15	-3.7		2014-12-14 08:59:00	0.92497
2015-02-06 02:41:00	5.07958		2006-01-16	-5.3		2014-12-14 09:09:00	0.93984
2015-02-06 02:51:00	5.14653		2006-01-17	-3.5		2014-12-14 09:19:00	0.96958
2015-02-06 03:01:00	5.04686		2006-01-18	-2.6		2014-12-14 09:29:00	0.98445
2015-02-06 03:11:00	5.24608		2006-01-19	0.7		2014-12-14 09:39:00	0.96958
2015-02-06 03:21:00	5.28804		2006-01-20	-0.6		2014-12-14 09:49:00	1.00591
2015-02-06 03:31:00	5.49287		2006-01-21	-1.3		2014-12-14 09:59:00	1.04057
2015-02-06 03:41:00	5.43085		2006-01-22	2.8		2014-12-14 10:09:00	1.05377
2015-02-06 03:51:00	5.40603		2006-01-23	-10.3		2014-12-14 10:19:00	1.10159
2015-02-06 04:01:00	5.49752		2006-01-24	-14.6		2014-12-14 10:29:00	1.15267
2015-02-06 04:11:00	5.53315		2006-01-25	-12		2014-12-14 10:39:00	1.1642
2015-02-06 04:21:00	5.49442		2006-01-26	-11.6		2014-12-14 10:49:00	1.20699
2015-02-06 04:31:00	5.41379		2006-01-27	-8.8		2014-12-14 10:59:00	1.21193
2015-02-06 04:41:00	5.49287		2006-01-28	-6.5		2014-12-14 11:09:00	1.26127
2015-02-06 04:51:00	5.30979		2006-01-29	-0.6		2014-12-14 11:19:00	1.24812
2015-02-06 05:01:00	5.40914		2006-01-30	3.5		2014-12-14 11:29:00	1.26949
2015-02-06 05:11:00	5.44791		2006-01-31	3.6		2014-12-14 11:39:00	1.26456
2015-02-06 05:21:00	5.39983		2006-02-01	0.6		2014-12-14 11:49:00	1.25634
2015-02-06 05:31:00	5.3781		2006-02-02	1.6		2014-12-14 11:59:00	1.26127
2015-02-06 05:41:00	5.31134		2006-02-03	-0.6		2014-12-14 12:09:00	1.25634
2015-02-06 05:51:00	5.20876		2006-02-04	-1.7		2014-12-14 12:19:00	1.26127
2015-02-06 06:01:00	5.22898		2006-02-05	-1.2		2014-12-14 12:29:00	1.30894
2015-02-06 06:11:00	5.09983		2006-02-06	-6		2014-12-14 12:39:00	1.31879
2015-02-06 06:21:00	5.04842		2006-02-07	-8.3		2014-12-14 12:49:00	1.33193
2015-02-06 06:31:00	4.96735		2006-02-08	-4.6		2014-12-14 12:59:00	1.30894
2015-02-06 06:41:00	4.86434		2006-02-09	-1.9		2014-12-14 13:09:00	1.32044
2015-02-06 06:51:00	4.88776		2006-02-10	-2.4		2014-12-14 13:19:00	1.33522
2015-02-06 07:01:00	4.78464		2006-02-11	-2.2		2014-12-14 13:29:00	1.36477
2015-02-06 07:11:00	4.92679		2006-02-12	0.5		2014-12-14 13:39:00	1.35985
2015-02-06 07:21:00	4.97671		2006-02-13	-1		2014-12-14 13:49:00	1.38282
2015-02-06 07:31:00	4.92522		2006-02-14	-1.4		2014-12-14 13:59:00	1.42383
2015-02-06 07:41:00	4.88464		2006-02-15	-2.1		2014-12-14 14:09:00	1.42875
2015-02-06 07:51:00	4.59838		2006-02-16	-2.6		2014-12-14 14:19:00	1.44515
2015-02-06 08:01:00	4.39753		2006-02-17	-0.5		2014-12-14 14:29:00	1.4599
2015-02-06 08:11:00	4.50273		2006-02-18	4.7		2014-12-14 14:39:00	1.4681
2015-02-06 08:21:00	4.52312		2006-02-19	5.6		2014-12-14 14:49:00	1.4894
2015-02-06 08:31:00	4.40696		2006-02-20	4.7		2014-12-14 14:59:00	1.52379
2015-02-06 08:41:00	4.33308		2006-02-21	4.2		2014-12-14 15:09:00	1.54834
2015-02-06 08:51:00	4.35038		2006-02-22	6		2014-12-14 15:19:00	1.5418
2015-02-06 09:01:00	3.93578		2006-02-23	6.6		2014-12-14 15:29:00	1.53525
2015-02-06 09:11:00	3.86619		2006-02-24	4.1		2014-12-14 15:39:00	1.52543
2015-02-06 09:21:00	3.98792		2006-02-25	0.4		2014-12-14 15:49:00	1.5418
2015-02-06 09:31:00	4.09369		2006-02-26	0.2		2014-12-14 15:59:00	1.53198
2015-02-06 09:41:00	4.08896		2006-02-27	2.1		2014-12-14 16:09:00	1.51396
2015-02-06 09:51:00	4.07002		2006-02-28	0		2014-12-14 16:19:00	1.50086
2015-02-06 10:01:00	4.31264		2006-03-01	-0.2		2014-12-14 16:29:00	1.52379
2015-02-06 10:11:00	4.18355		2006-03-02	-0.1		2014-12-14 16:39:00	1.50086
2015-02-06 10:21:00	4.15046		2006-03-03	2.1		2014-12-14 16:49:00	1.48284
2015-02-06 10:31:00	4.05109		2006-03-04	3.5		2014-12-14 16:59:00	1.45662
2015-02-06 10:41:00	4.13469		2006-03-05	7.7		2014-12-14 17:09:00	1.42547
2015-02-06 10:51:00	4.21978		2006-03-06	3.3		2014-12-14 17:19:00	1.37462
2015-02-06 11:01:00	4.19615		2006-03-07	-0.1		2014-12-14 17:29:00	1.34179
2015-02-06 11:11:00	4.29691		2006-03-08	-0.1		2014-12-14 17:39:00	1.30565
2015-02-06 11:21:00	4.15046		2006-03-09	-0.7		2014-12-14 17:49:00	1.26949
2015-02-06 11:31:00	3.97055		2006-03-10	1.5		2014-12-14 17:59:00	1.26456
2015-02-06 11:41:00	3.88992		2006-03-11	5.5		2014-12-14 18:09:00	1.24812
2015-02-06 11:51:00	3.66655		2006-03-12	4.8		2014-12-14 18:19:00	1.23661
2015-02-06 12:01:00	3.81396		2006-03-13	3.4		2014-12-14 18:29:00	1.23496
2015-02-06 12:11:00	4.00214		2006-03-14	2		2014-12-14 18:39:00	1.22345
2015-02-06 12:21:00	4.10315		2006-03-15	3.2		2014-12-14 18:49:00	1.22674
2015-02-06 12:31:00	4.13154		2006-03-16	4.2		2014-12-14 18:59:00	1.21851
2015-02-06 12:41:00	3.92945		2006-03-17	5		2014-12-14 19:09:00	1.21687
2015-02-06 12:51:00	3.76961		2006-03-18	6.2		2014-12-14 19:19:00	1.21358
2015-02-06 13:01:00	3.70779		2006-03-19	5.5		2014-12-14 19:29:00	1.21522
2015-02-06 13:11:00	3.57924		2006-03-20	7.1		2014-12-14 19:39:00	1.22509
2015-02-06 13:21:00	3.69511		2006-03-21	9.8		2014-12-14 19:49:00	1.25305
2015-02-06 13:31:00	3.6237		2006-03-22	11.6		2014-12-14 19:59:00	1.25799
2015-02-06 13:41:00	3.38519		2006-03-23	10.9		2014-12-14 20:09:00	1.27114
2015-02-06 13:51:00	3.37563		2006-03-24	3.8		2014-12-14 20:19:00	1.29251
2015-02-06 14:01:00	3.20019		2006-03-25	5.4		2014-12-14 20:29:00	1.29415
2015-02-06 14:11:00	3.37881		2006-03-26	8.4		2014-12-14 20:39:00	1.30894
2015-02-06 14:21:00	3.47273		2006-03-27	15.1		2014-12-14 20:49:00	1.31879
2015-02-06 14:31:00	3.58559		2006-03-28	15.7		2014-12-14 20:59:00	1.36477
2015-02-06 14:41:00	3.89467		2006-03-29	12.8		2014-12-14 21:09:00	1.34014
2015-02-06 14:51:00	3.97213		2006-03-30	11.1		2014-12-14 21:19:00	1.32372
2015-02-06 15:01:00	4.08107		2006-03-31	11.7		2014-12-14 21:29:00	1.30236
2015-02-06 15:11:00	4.141		2006-04-01	14		2014-12-14 21:39:00	1.28593
2015-02-06 15:21:00	4.1741		2006-04-02	12.9		2014-12-14 21:49:00	1.28429
2015-02-06 15:31:00	4.27488		2006-04-03	12.1		2014-12-14 21:59:00	1.32536
2015-02-06 15:41:00	4.35038		2006-04-04	10.3		2014-12-14 22:09:00	1.37134
2015-02-06 15:51:00	4.59524		2006-04-05	11.4		2014-12-14 22:19:00	1.37954
2015-02-06 16:01:00	4.60151		2006-04-06	12.2		2014-12-14 22:29:00	1.37298
2015-02-06 16:11:00	4.48233		2006-04-07	8.6		2014-12-14 22:39:00	1.38282
2015-02-06 16:21:00	4.59211		2006-04-08	9.8		2014-12-14 22:49:00	1.41071
2015-02-06 16:31:00	4.66887		2006-04-09	9.2		2014-12-14 22:59:00	1.41727
2015-02-06 16:41:00	4.80028		2006-04-10	12		2014-12-14 23:09:00	1.39923
2015-02-06 16:51:00	4.66887		2006-04-11	14.4		2014-12-14 23:19:00	1.37134
2015-02-06 17:01:00	4.59995		2006-04-12	10.2		2014-12-14 23:29:00	1.38611
2015-02-06 17:11:00	4.55135		2006-04-13	8.9		2014-12-14 23:39:00	1.36805
2015-02-06 17:21:00	4.64538		2006-04-14	11.4		2014-12-14 23:49:00	1.41235
2015-02-06 17:31:00	4.67356		2006-04-15	12.5		2014-12-14 23:59:00	1.3779
2015-02-06 17:41:00	4.54351		2006-04-16	11.8		2014-12-15 00:09:00	1.42711
2015-02-06 17:51:00	4.54194		2006-04-17	13.9		2014-12-15 00:19:00	1.46973
2015-02-06 18:01:00	4.40224		2006-04-18	15.5		2014-12-15 00:29:00	1.45498
2015-02-06 18:11:00	4.59368		2006-04-19	13.4		2014-12-15 00:39:00	1.48776
2015-02-06 18:21:00	4.40853		2006-04-20	13.3		2014-12-15 00:49:00	1.50578
2015-02-06 18:31:00	4.59211		2006-04-21	14		2014-12-15 00:59:00	1.47629
2015-02-06 18:41:00	4.49802		2006-04-22	14.8		2014-12-15 01:09:00	1.4812
2015-02-06 18:51:00	4.141		2006-04-23	14.7		2014-12-15 01:19:00	1.44351
2015-02-06 19:01:00	4.37553		2006-04-24	14.7		2014-12-15 01:29:00	1.41399
2015-02-06 19:11:00	3.8567		2006-04-25	15.5		2014-12-15 01:39:00	1.40907
2015-02-06 19:21:00	3.82504		2006-04-26	16.2		2014-12-15 01:49:00	1.43203
2015-02-06 19:31:00	3.69193		2006-04-27	16.8		2014-12-15 01:59:00	1.46318
2015-02-06 19:41:00	3.59512		2006-04-28	16.4		2014-12-15 02:09:00	1.47629
2015-02-06 19:51:00	3.78862		2006-04-29	12.2		2014-12-15 02:19:00	1.48776
2015-02-06 20:01:00	3.91839		2006-04-30	12.6		2014-12-15 02:29:00	1.51069
2015-02-06 20:11:00	4.01162		2006-05-01	14.1		2014-12-15 02:39:00	1.51888
2015-02-06 20:21:00	3.71255		2006-05-02	13		2014-12-15 02:49:00	1.49431
2015-02-06 20:31:00	4.08107		2006-05-03	13.9		2014-12-15 02:59:00	1.45498
2015-02-06 20:41:00	4.36453		2006-05-04	14.7		2014-12-15 03:09:00	1.43859
2015-02-06 20:51:00	4.30792		2006-05-05	13.7		2014-12-15 03:19:00	1.46973
2015-02-06 21:01:00	4.1867		2006-05-06	12.4		2014-12-15 03:29:00	1.49922
2015-02-06 21:11:00	3.93103		2006-05-07	12.4		2014-12-15 03:39:00	1.45007
2015-02-06 21:21:00	3.87568		2006-05-08	15.1		2014-12-15 03:49:00	1.42055
2015-02-06 21:31:00	3.89308		2006-05-09	15.9		2014-12-15 03:59:00	1.41235
2015-02-06 21:41:00	3.93736		2006-05-10	12.6		2014-12-15 04:09:00	1.39267
2015-02-06 21:51:00	3.95316		2006-05-11	12.8		2014-12-15 04:19:00	1.39267
2015-02-06 22:01:00	3.86461		2006-05-12	14.7		2014-12-15 04:29:00	1.40251
2015-02-06 22:11:00	3.80129		2006-05-13	16.1		2014-12-15 04:39:00	1.40251
2015-02-06 22:21:00	3.72206		2006-05-14	17		2014-12-15 04:49:00	1.42711
2015-02-06 22:31:00	4.16622		2006-05-15	18.1		2014-12-15 04:59:00	1.42547
2015-02-06 22:41:00	4.51371		2006-05-16	17.8		2014-12-15 05:09:00	1.41399
2015-02-06 22:51:00	4.59054		2006-05-17	17.6		2014-12-15 05:19:00	1.42547
2015-02-06 23:01:00	4.58427		2006-05-18	19.3		2014-12-15 05:29:00	1.44351
2015-02-06 23:11:00	4.53724		2006-05-19	18.9		2014-12-15 05:39:00	1.46318
2015-02-06 23:21:00	4.5686		2006-05-20	22.2		2014-12-15 05:49:00	1.47137
2015-02-06 23:31:00	4.52312		2006-05-21	22		2014-12-15 05:59:00	1.51233
2015-02-06 23:41:00	4.65164		2006-05-22	22.8		2014-12-15 06:09:00	1.46973
2015-02-06 23:51:00	4.62188		2006-05-23	23.5		2014-12-15 06:19:00	1.46482
2015-02-07 00:01:00	4.45878		2006-05-24	24.8		2014-12-15 06:29:00	1.50578
2015-02-07 00:11:00	4.44779		2006-05-25	21.1		2014-12-15 06:39:00	1.48448
2015-02-07 00:21:00	4.92054		2006-05-26	20		2014-12-15 06:49:00	1.49922
2015-02-07 00:31:00	5.15742		2006-05-27	19.7		2014-12-15 06:59:00	1.54343
2015-02-07 00:41:00	5.10761		2006-05-28	21.5		2014-12-15 07:09:00	1.53689
2015-02-07 00:51:00	5.00634		2006-05-29	18.2		2014-12-15 07:19:00	1.56307
2015-02-07 01:01:00	4.76119		2006-05-30	19.6		2014-12-15 07:29:00	1.5598
2015-02-07 01:11:00	4.93771		2006-05-31	14.1		2014-12-15 07:39:00	1.55816
2015-02-07 01:21:00	4.76901		2006-06-01	16.6		2014-12-15 07:49:00	1.56471
2015-02-07 01:31:00	4.48703		2006-06-02	14.4		2014-12-15 07:59:00	1.57453
2015-02-07 01:41:00	4.52626		2006-06-03	14.6		2014-12-15 08:09:00	1.57943
2015-02-07 01:51:00	4.37867		2006-06-04	15.2		2014-12-15 08:19:00	1.57616
2015-02-07 02:01:00	4.29062		2006-06-05	15.7		2014-12-15 08:29:00	1.55162
2015-02-07 02:11:00	4.57957		2006-06-06	16.5		2014-12-15 08:39:00	1.51396
2015-02-07 02:21:00	4.80653		2006-06-07	16.2		2014-12-15 08:49:00	1.53198
2015-02-07 02:31:00	4.80653		2006-06-08	15.6		2014-12-15 08:59:00	1.55162
2015-02-07 02:41:00	4.63441		2006-06-09	15.8		2014-12-15 09:09:00	1.53852
2015-02-07 02:51:00	4.79246		2006-06-10	16		2014-12-15 09:19:00	1.55816
2015-02-07 03:01:00	4.97203		2006-06-11	16.2		2014-12-15 09:29:00	1.56635
2015-02-07 03:11:00	5.10294		2006-06-12	17.8		2014-12-15 09:39:00	1.60397
2015-02-07 03:21:00	5.11695		2006-06-13	17		2014-12-15 09:49:00	1.6432
2015-02-07 03:31:00	5.27871		2006-06-14	16.7		2014-12-15 09:59:00	1.62849
2015-02-07 03:41:00	5.03284		2006-06-15	17.8		2014-12-15 10:09:00	1.63176
2015-02-07 03:51:00	5.1045		2006-06-16	23		2014-12-15 10:19:00	1.63503
2015-02-07 04:01:00	5.4231		2006-06-17	23.3		2014-12-15 10:29:00	1.58434
2015-02-07 04:11:00	5.58736		2006-06-18	23.6		2014-12-15 10:39:00	1.57943
2015-02-07 04:21:00	5.25385		2006-06-19	25.5		2014-12-15 10:49:00	1.66118
2015-02-07 04:31:00	4.8659		2006-06-20	24		2014-12-15 10:59:00	1.70364
2015-02-07 04:41:00	4.63911		2006-06-21	25.3		2014-12-15 11:09:00	1.69874
2015-02-07 04:51:00	4.84403		2006-06-22	24.8		2014-12-15 11:19:00	1.69711
2015-02-07 05:01:00	4.87839		2006-06-23	24.2		2014-12-15 11:29:00	1.70038
2015-02-07 05:11:00	5.18232		2006-06-24	23.1		2014-12-15 11:39:00	1.69221
2015-02-07 05:21:00	4.94239		2006-06-25	25		2014-12-15 11:49:00	1.72323
2015-02-07 05:31:00	4.69078		2006-06-26	27.4		2014-12-15 11:59:00	1.75424
2015-02-07 05:41:00	4.36767		2006-06-27	27.4		2014-12-15 12:09:00	1.73792
2015-02-07 05:51:00	4.17095		2006-06-28	28.4		2014-12-15 12:19:00	1.73302
2015-02-07 06:01:00	4.13312		2006-06-29	27.9		2014-12-15 12:29:00	1.72486
2015-02-07 06:11:00	4.02109		2006-06-30	25		2014-12-15 12:39:00	1.74118
2015-02-07 06:21:00	3.92787		2006-07-01	22.5		2014-12-15 12:49:00	1.76892
2015-02-07 06:31:00	4.2371		2006-07-02	20.3		2014-12-15 12:59:00	1.77055
2015-02-07 06:41:00	4.29062		2006-07-03	20.2		2014-12-15 13:09:00	1.77055
2015-02-07 06:51:00	4.46663		2006-07-04	20.8		2014-12-15 13:19:00	1.77707
2015-02-07 07:01:00	4.80028		2006-07-05	22.9		2014-12-15 13:29:00	1.7836
2015-02-07 07:11:00	4.93147		2006-07-06	23.2		2014-12-15 13:39:00	1.7575
2015-02-07 07:21:00	5.00946		2006-07-07	24.1		2014-12-15 13:49:00	1.72976
2015-02-07 07:31:00	5.02972		2006-07-08	23.9		2014-12-15 13:59:00	1.70201
2015-02-07 07:41:00	5.01881		2006-07-09	24.1		2014-12-15 14:09:00	1.70691
2015-02-07 07:51:00	5.16676		2006-07-10	23.7		2014-12-15 14:19:00	1.69874
2015-02-07 08:01:00	5.05154		2006-07-11	24.2		2014-12-15 14:29:00	1.72813
2015-02-07 08:11:00	5.43861		2006-07-12	22.8		2014-12-15 14:39:00	1.68241
2015-02-07 08:21:00	5.24608		2006-07-13	22.6		2014-12-15 14:49:00	1.69221
2015-02-07 08:31:00	5.06089		2006-07-14	22.3		2014-12-15 14:59:00	1.68731
2015-02-07 08:41:00	4.96423		2006-07-15	22.5		2014-12-15 15:09:00	1.69711
2015-02-07 08:51:00	4.98295		2006-07-16	20.6		2014-12-15 15:19:00	1.69384
2015-02-07 09:01:00	5.12007		2006-07-17	21.2		2014-12-15 15:29:00	1.69384
2015-02-07 09:11:00	5.10138		2006-07-18	21.9		2014-12-15 15:39:00	1.69711
2015-02-07 09:21:00	5.08269		2006-07-19	23.9		2014-12-15 15:49:00	1.69384
2015-02-07 09:31:00	5.42775		2006-07-20	25.9		2014-12-15 15:59:00	1.67588
2015-02-07 09:41:00	5.48667		2006-07-21	25.7		2014-12-15 16:09:00	1.73466
2015-02-07 09:51:00	5.55484		2006-07-22	25.6		2014-12-15 16:19:00	1.75913
2015-02-07 10:01:00	5.6539		2006-07-23	25.4		2014-12-15 16:29:00	1.74281
2015-02-07 10:11:00	5.6276		2006-07-24	27		2014-12-15 16:39:00	1.73955
2015-02-07 10:21:00	5.66163		2006-07-25	27		2014-12-15 16:49:00	1.75097
2015-02-07 10:31:00	5.86401		2006-07-26	26.4		2014-12-15 16:59:00	1.73302
2015-02-07 10:41:00	5.8995		2006-07-27	25.7		2014-12-15 17:09:00	1.73302
2015-02-07 10:51:00	5.90412		2006-07-28	27.7		2014-12-15 17:19:00	1.7167
2015-02-07 11:01:00	5.61676		2006-07-29	27.2		2014-12-15 17:29:00	1.70854
2015-02-07 11:11:00	5.36568		2006-07-30	25.3		2014-12-15 17:39:00	1.69384
2015-02-07 11:21:00	5.48977		2006-07-31	26.6		2014-12-15 17:49:00	1.67425
2015-02-07 11:31:00	5.57342		2006-08-01	25.9		2014-12-15 17:59:00	1.66118
2015-02-07 11:41:00	5.62141		2006-08-02	25.4		2014-12-15 18:09:00	1.6432
2015-02-07 11:51:00	5.86401		2006-08-03	23.7		2014-12-15 18:19:00	1.64647
2015-02-07 12:01:00	5.87944		2006-08-04	25		2014-12-15 18:29:00	1.65627
2015-02-07 12:11:00	5.48822		2006-08-05	20.9		2014-12-15 18:39:00	1.66118
2015-02-07 12:21:00	5.00322		2006-08-06	22.4		2014-12-15 18:49:00	1.6334
2015-02-07 12:31:00	4.74242		2006-08-07	21.4		2014-12-15 18:59:00	1.62849
2015-02-07 12:41:00	4.708		2006-08-08	20.2		2014-12-15 19:09:00	1.62032
2015-02-07 12:51:00	4.63128		2006-08-09	21.4		2014-12-15 19:19:00	1.61705
2015-02-07 13:01:00	4.21821		2006-08-10	19.3		2014-12-15 19:29:00	1.61051
2015-02-07 13:11:00	3.8567		2006-08-11	20.5		2014-12-15 19:39:00	1.59088
2015-02-07 13:21:00	3.611		2006-08-12	21.5		2014-12-15 19:49:00	1.59743
2015-02-07 13:31:00	3.37404		2006-08-13	23.3		2014-12-15 19:59:00	1.6007
2015-02-07 13:41:00	3.28796		2006-08-14	21.5		2014-12-15 20:09:00	1.60397
2015-02-07 13:51:00	3.3342		2006-08-15	21.2		2014-12-15 20:19:00	1.58434
2015-02-07 14:01:00	3.41544		2006-08-16	21.6		2014-12-15 20:29:00	1.58598
2015-02-07 14:11:00	3.37563		2006-08-17	23.3		2014-12-15 20:39:00	1.58107
2015-02-07 14:21:00	3.4027		2006-08-18	25.5		2014-12-15 20:49:00	1.58925
2015-02-07 14:31:00	3.74267		2006-08-19	26.3		2014-12-15 20:59:00	1.57453
2015-02-07 14:41:00	3.9579		2006-08-20	27.3		2014-12-15 21:09:00	1.58271
2015-02-07 14:51:00	3.9342		2006-08-21	22.9		2014-12-15 21:19:00	1.56635
2015-02-07 15:01:00	4.06529		2006-08-22	21.7		2014-12-15 21:29:00	1.56307
2015-02-07 15:11:00	3.9089		2006-08-23	21.3		2014-12-15 21:39:00	1.5418
2015-02-07 15:21:00	4.01951		2006-08-24	20.8		2014-12-15 21:49:00	1.53689
2015-02-07 15:31:00	4.07949		2006-08-25	22.3		2014-12-15 21:59:00	1.5418
2015-02-07 15:41:00	3.82504		2006-08-26	18.8		2014-12-15 22:09:00	1.53034
2015-02-07 15:51:00	3.55382		2006-08-27	21		2014-12-15 22:19:00	1.5287
2015-02-07 16:01:00	3.43295		2006-08-28	17.5		2014-12-15 22:29:00	1.51724
2015-02-07 16:11:00	3.97529		2006-08-29	17		2014-12-15 22:39:00	1.50578
2015-02-07 16:21:00	3.72365		2006-08-30	13.3		2014-12-15 22:49:00	1.47793
2015-02-07 16:31:00	3.98792		2006-08-31	14.6		2014-12-15 22:59:00	1.45171
2015-02-07 16:41:00	4.02899		2006-09-01	17.7		2014-12-15 23:09:00	1.46154
2015-02-07 16:51:00	3.93736		2006-09-02	17.8		2014-12-15 23:19:00	1.43695
2015-02-07 17:01:00	4.16464		2006-09-03	19.5		2014-12-15 23:29:00	1.44515
2015-02-07 17:11:00	4.02899		2006-09-04	22.4		2014-12-15 23:39:00	1.46646
2015-02-07 17:21:00	3.81712		2006-09-05	23.2		2014-12-15 23:49:00	1.49103
2015-02-07 17:31:00	3.71096		2006-09-06	21.4		2014-12-15 23:59:00	1.45498
2015-02-07 17:41:00	3.66814		2006-09-07	18.3		2014-12-16 00:09:00	1.48284
2015-02-07 17:51:00	3.82662		2006-09-08	20		2014-12-16 00:19:00	1.48612
2015-02-07 18:01:00	4.11262		2006-09-09	19.9		2014-12-16 00:29:00	1.48776
2015-02-07 18:11:00	4.54665		2006-09-10	17.7		2014-12-16 00:39:00	1.45662
2015-02-07 18:21:00	4.79715		2006-09-11	16.5		2014-12-16 00:49:00	1.47957
2015-02-07 18:31:00	4.67356		2006-09-12	17.7		2014-12-16 00:59:00	1.45498
2015-02-07 18:41:00	4.90493		2006-09-13	18.5		2014-12-16 01:09:00	1.43203
2015-02-07 18:51:00	4.91118		2006-09-14	18.3		2014-12-16 01:19:00	1.45498
2015-02-07 19:01:00	4.64381		2006-09-15	17.2		2014-12-16 01:29:00	1.47137
2015-02-07 19:11:00	4.509		2006-09-16	19.6		2014-12-16 01:39:00	1.49595
2015-02-07 19:21:00	4.32365		2006-09-17	19.7		2014-12-16 01:49:00	1.49431
2015-02-07 19:31:00	4.04793		2006-09-18	18.7		2014-12-16 01:59:00	1.49922
2015-02-07 19:41:00	4.11104		2006-09-19	18.4		2014-12-16 02:09:00	1.46646
2015-02-07 19:51:00	4.48703		2006-09-20	19		2014-12-16 02:19:00	1.47465
2015-02-07 20:01:00	4.48547		2006-09-21	19.1		2014-12-16 02:29:00	1.44843
2015-02-07 20:11:00	4.56703		2006-09-22	14.6		2014-12-16 02:39:00	1.44515
2015-02-07 20:21:00	4.63285		2006-09-23	12.2		2014-12-16 02:49:00	1.43203
2015-02-07 20:31:00	4.73929		2006-09-24	16.3		2014-12-16 02:59:00	1.43695
2015-02-07 20:41:00	4.85028		2006-09-25	17.5		2014-12-16 03:09:00	1.42547
2015-02-07 20:51:00	4.38967		2006-09-26	18.1		2014-12-16 03:19:00	1.41399
2015-02-07 21:01:00	3.99582		2006-09-27	17		2014-12-16 03:29:00	1.43039
2015-02-07 21:11:00	3.1938		2006-09-28	17.1		2014-12-16 03:39:00	1.43039
2015-02-07 21:21:00	3.15546		2006-09-29	18.8		2014-12-16 03:49:00	1.46973
2015-02-07 21:31:00	3.08991		2006-09-30	18.4		2014-12-16 03:59:00	1.47301
2015-02-07 21:41:00	3.38519		2006-10-01	17.6		2014-12-16 04:09:00	1.4599
2015-02-07 21:51:00	3.60147		2006-10-02	17.5		2014-12-16 04:19:00	1.45007
2015-02-07 22:01:00	3.62688		2006-10-03	18.9		2014-12-16 04:29:00	1.45007
2015-02-07 22:11:00	3.31666		2006-10-04	20.2		2014-12-16 04:39:00	1.45662
2015-02-07 22:21:00	2.82551		2006-10-05	20.6		2014-12-16 04:49:00	1.46154
2015-02-07 22:31:00	2.23213		2006-10-06	16.9		2014-12-16 04:59:00	1.46154
2015-02-07 22:41:00	2.67765		2006-10-07	14.6		2014-12-16 05:09:00	1.46646
2015-02-07 22:51:00	2.84638		2006-10-08	14.8		2014-12-16 05:19:00	1.47793
2015-02-07 23:01:00	3.02431		2006-10-09	14.8		2014-12-16 05:29:00	1.47793
2015-02-07 23:11:00	2.87527		2006-10-10	13.3		2014-12-16 05:39:00	1.48284
2015-02-07 23:21:00	2.76609		2006-10-11	14.6		2014-12-16 05:49:00	1.50086
2015-02-07 23:31:00	2.60521		2006-10-12	14.5		2014-12-16 05:59:00	1.50905
2015-02-07 23:41:00	2.08458		2006-10-13	13.1		2014-12-16 06:09:00	1.50086
2015-02-07 23:51:00	2.25803		2006-10-14	12.4		2014-12-16 06:19:00	1.4812
2015-02-08 00:01:00	1.82924		2006-10-15	13		2014-12-16 06:29:00	1.4681
2015-02-08 00:11:00	2.04886		2006-10-16	13.5		2014-12-16 06:39:00	1.4812
2015-02-08 00:21:00	2.10243		2006-10-17	9		2014-12-16 06:49:00	1.50414
2015-02-08 00:31:00	2.36803		2006-10-18	7.2		2014-12-16 06:59:00	1.51233
2015-02-08 00:41:00	2.65351		2006-10-19	6.7		2014-12-16 07:09:00	1.51888
2015-02-08 00:51:00	2.36803		2006-10-20	9		2014-12-16 07:19:00	1.52215
2015-02-08 01:01:00	2.04074		2006-10-21	9.6		2014-12-16 07:29:00	1.51233
2015-02-08 01:11:00	1.9188		2006-10-22	12.6		2014-12-16 07:39:00	1.47629
2015-02-08 01:21:00	2.20459		2006-10-23	15.3		2014-12-16 07:49:00	1.46973
2015-02-08 01:31:00	2.28555		2006-10-24	16.2		2014-12-16 07:59:00	1.4681
2015-02-08 01:41:00	2.38258		2006-10-25	17.8		2014-12-16 08:09:00	1.4681
2015-02-08 01:51:00	2.57138		2006-10-26	14		2014-12-16 08:19:00	1.45171
2015-02-08 02:01:00	2.41974		2006-10-27	13.1		2014-12-16 08:29:00	1.42055
2015-02-08 02:11:00	2.26613		2006-10-28	15.4		2014-12-16 08:39:00	1.39431
2015-02-08 02:21:00	2.38581		2006-10-29	14.7		2014-12-16 08:49:00	1.39595
2015-02-08 02:31:00	2.36803		2006-10-30	12		2014-12-16 08:59:00	1.39431
2015-02-08 02:41:00	2.59233		2006-10-31	5.2		2014-12-16 09:09:00	1.41727
2015-02-08 02:51:00	2.73073		2006-11-01	4.4		2014-12-16 09:19:00	1.42547
2015-02-08 03:01:00	2.87366		2006-11-02	8		2014-12-16 09:29:00	1.44679
2015-02-08 03:11:00	2.60843		2006-11-03	2		2014-12-16 09:39:00	1.47137
2015-02-08 03:21:00	2.40035		2006-11-04	1.4		2014-12-16 09:49:00	1.47465
2015-02-08 03:31:00	2.08296		2006-11-05	5.2		2014-12-16 09:59:00	1.48284
2015-02-08 03:41:00	2.37611		2006-11-06	9.6		2014-12-16 10:09:00	1.51233
2015-02-08 03:51:00	1.73139		2006-11-07	11		2014-12-16 10:19:00	1.53034
2015-02-08 04:01:00	1.26621		2006-11-08	10.5		2014-12-16 10:29:00	1.53034
2015-02-08 04:11:00	1.20699		2006-11-09	12.2		2014-12-16 10:39:00	1.56798
2015-02-08 04:21:00	1.35985		2006-11-10	9.4		2014-12-16 10:49:00	1.56307
2015-02-08 04:31:00	1.05047		2006-11-11	4		2014-12-16 10:59:00	1.56798
2015-02-08 04:41:00	1.03727		2006-11-12	5.3		2014-12-16 11:09:00	1.55816
2015-02-08 04:51:00	0.53193		2006-11-13	7.7		2014-12-16 11:19:00	1.5418
2015-02-08 05:01:00	0.67484		2006-11-14	8.6		2014-12-16 11:29:00	1.55653
2015-02-08 05:11:00	1.13125		2006-11-15	12.8		2014-12-16 11:39:00	1.55325
2015-02-08 05:21:00	1.1856		2006-11-16	11.4		2014-12-16 11:49:00	1.57289
2015-02-08 05:31:00	1.15596		2006-11-17	11.1		2014-12-16 11:59:00	1.60397
2015-02-08 05:41:00	1.04057		2006-11-18	8.8		2014-12-16 12:09:00	1.62522
2015-02-08 05:51:00	1.32372		2006-11-19	7.3		2014-12-16 12:19:00	1.6334
2015-02-08 06:01:00	0.81411		2006-11-20	8.8		2014-12-16 12:29:00	1.62359
2015-02-08 06:11:00	0.92001		2006-11-21	8		2014-12-16 12:39:00	1.66118
2015-02-08 06:21:00	0.79092		2006-11-22	8.8		2014-12-16 12:49:00	1.64974
2015-02-08 06:31:00	1.20041		2006-11-23	10.3		2014-12-16 12:59:00	1.67261
2015-02-08 06:41:00	0.45701		2006-11-24	9.7		2014-12-16 13:09:00	1.65791
2015-02-08 06:51:00	0.29019		2006-11-25	10.1		2014-12-16 13:19:00	1.63503
2015-02-08 07:01:00	-0.08856		2006-11-26	10		2014-12-16 13:29:00	1.62032
2015-02-08 07:11:00	-0.52738		2006-11-27	7.3		2014-12-16 13:39:00	1.59088
2015-02-08 07:21:00	-0.38017		2006-11-28	6.8		2014-12-16 13:49:00	1.59252
2015-02-08 07:31:00	-0.47488		2006-11-29	6.9		2014-12-16 13:59:00	1.6056
2015-02-08 07:41:00	-0.07175		2006-11-30	7.6		2014-12-16 14:09:00	1.66118
2015-02-08 07:51:00	-0.38355		2006-12-01	7.9		2014-12-16 14:19:00	1.71833
2015-02-08 08:01:00	-0.62234		2006-12-02	3.8		2014-12-16 14:29:00	1.72813
2015-02-08 08:11:00	-0.78719		2006-12-03	3.3		2014-12-16 14:39:00	1.74608
2015-02-08 08:21:00	-1.35174		2006-12-04	2.7		2014-12-16 14:49:00	1.71344
2015-02-08 08:31:00	-1.22292		2006-12-05	9.4		2014-12-16 14:59:00	1.71017
2015-02-08 08:41:00	-1.25381		2006-12-06	6		2014-12-16 15:09:00	1.71833
2015-02-08 08:51:00	-1.43951		2006-12-07	4.7		2014-12-16 15:19:00	1.72486
2015-02-08 09:01:00	-1.15606		2006-12-08	3.6		2014-12-16 15:29:00	1.69874
2015-02-08 09:11:00	-1.32939		2006-12-09	3.5		2014-12-16 15:39:00	1.68241
2015-02-08 09:21:00	-0.79911		2006-12-10	3.2		2014-12-16 15:49:00	1.68731
2015-02-08 09:31:00	-0.02303		2006-12-11	5.9		2014-12-16 15:59:00	1.69384
2015-02-08 09:41:00	0.53858		2006-12-12	6.6		2014-12-16 16:09:00	1.66444
2015-02-08 09:51:00	0.86377		2006-12-13	1.1		2014-12-16 16:19:00	1.66934
2015-02-08 10:01:00	1.27278		2006-12-14	3.3		2014-12-16 16:29:00	1.66934
2015-02-08 10:11:00	1.63503		2006-12-15	4.3		2014-12-16 16:39:00	1.6481
2015-02-08 10:21:00	1.74771		2006-12-16	3.4		2014-12-16 16:49:00	1.67425
2015-02-08 10:31:00	2.12839		2006-12-17	6.3		2014-12-16 16:59:00	1.66281
2015-02-08 10:41:00	2.45041		2006-12-18	6.7		2014-12-16 17:09:00	1.66281
2015-02-08 10:51:00	2.62615		2006-12-19	5.7		2014-12-16 17:19:00	1.68568
2015-02-08 11:01:00	2.87045		2006-12-20	2.6		2014-12-16 17:29:00	1.68405
2015-02-08 11:11:00	3.00349		2006-12-21	2.7		2014-12-16 17:39:00	1.68568
2015-02-08 11:21:00	3.13149		2006-12-22	2.7		2014-12-16 17:49:00	1.67751
2015-02-08 11:31:00	3.35651		2006-12-23	1.5		2014-12-16 17:59:00	1.66934
2015-02-08 11:41:00	3.382		2006-12-24	0.9		2014-12-16 18:09:00	1.67751
2015-02-08 11:51:00	3.86619		2006-12-25	2.9		2014-12-16 18:19:00	1.66934
2015-02-08 12:01:00	4.25127		2006-12-26	1.5		2014-12-16 18:29:00	1.67425
2015-02-08 12:11:00	4.35667		2006-12-27	-1.4		2014-12-16 18:39:00	1.66608
2015-02-08 12:21:00	3.77753		2006-12-28	0.8		2014-12-16 18:49:00	1.67915
2015-02-08 12:31:00	3.25765		2006-12-29	3.2		2014-12-16 18:59:00	1.67915
2015-02-08 12:41:00	3.14907		2006-12-30	0		2014-12-16 19:09:00	1.69221
2015-02-08 12:51:00	2.83675		2006-12-31	-0.9		2014-12-16 19:19:00	1.69548
2015-02-08 13:01:00	2.66317		2007-01-01	4.4		2014-12-16 19:29:00	1.67751
2015-02-08 13:11:00	2.18838		2007-01-02	6.6		2014-12-16 19:39:00	1.67915
2015-02-08 13:21:00	1.64484		2007-01-03	4.5		2014-12-16 19:49:00	1.68568
2015-02-08 13:31:00	1.71017		2007-01-04	4.4		2014-12-16 19:59:00	1.70527
2015-02-08 13:41:00	1.96598		2007-01-05	3		2014-12-16 20:09:00	1.68731
2015-02-08 13:51:00	2.69857		2007-01-06	5.7		2014-12-16 20:19:00	1.70038
2015-02-08 14:01:00	3.04512		2007-01-07	5.9		2014-12-16 20:29:00	1.70201
2015-02-08 14:11:00	2.95864		2007-01-08	6.3		2014-12-16 20:39:00	1.70201
2015-02-08 14:21:00	3.29594		2007-01-09	5.1		2014-12-16 20:49:00	1.69711
2015-02-08 14:31:00	2.90414		2007-01-10	6.7		2014-12-16 20:59:00	1.67261
2015-02-08 14:41:00	2.84638		2007-01-11	8		2014-12-16 21:09:00	1.67915
2015-02-08 14:51:00	3.07232		2007-01-12	7.5		2014-12-16 21:19:00	1.66608
2015-02-08 15:01:00	2.58427		2007-01-13	8.4		2014-12-16 21:29:00	1.6334
2015-02-08 15:11:00	2.14623		2007-01-14	10.7		2014-12-16 21:39:00	1.64647
2015-02-08 15:21:00	2.61165		2007-01-15	9.6		2014-12-16 21:49:00	1.64157
2015-02-08 15:31:00	3.04672		2007-01-16	2.4		2014-12-16 21:59:00	1.62032
2015-02-08 15:41:00	3.03551		2007-01-17	9.4		2014-12-16 22:09:00	1.61705
2015-02-08 15:51:00	2.8528		2007-01-18	8.4		2014-12-16 22:19:00	1.63503
2015-02-08 16:01:00	3.21296		2007-01-19	6.4		2014-12-16 22:29:00	1.6383
2015-02-08 16:11:00	3.00349		2007-01-20	10.4		2014-12-16 22:39:00	1.62686
2015-02-08 16:21:00	3.19859		2007-01-21	7.2		2014-12-16 22:49:00	1.6334
2015-02-08 16:31:00	3.611		2007-01-22	10.3		2014-12-16 22:59:00	1.65137
2015-02-08 16:41:00	3.42658		2007-01-23	6.1		2014-12-16 23:09:00	1.63993
2015-02-08 16:51:00	3.53475		2007-01-24	6.8		2014-12-16 23:19:00	1.63666
2015-02-08 17:01:00	3.53157		2007-01-25	6.1		2014-12-16 23:29:00	1.65137
2015-02-08 17:11:00	3.44728		2007-01-26	3.4		2014-12-16 23:39:00	1.65791
2015-02-08 17:21:00	3.59036		2007-01-27	-0.3		2014-12-16 23:49:00	1.65627
2015-02-08 17:31:00	3.6364		2007-01-28	1.6		2014-12-16 23:59:00	1.65137
2015-02-08 17:41:00	3.77911		2007-01-29	4.2		2014-12-17 00:09:00	1.64647
2015-02-08 17:51:00	3.64116		2007-01-30	3.8		2014-12-17 00:19:00	1.64484
2015-02-08 18:01:00	3.40748		2007-01-31	6.4		2014-12-17 00:29:00	1.64157
2015-02-08 18:11:00	3.1171		2007-02-01	3.5		2014-12-17 00:39:00	1.64484
2015-02-08 18:21:00	3.15067		2007-02-02	6.6		2014-12-17 00:49:00	1.64974
2015-02-08 18:31:00	3.04672		2007-02-03	2.1		2014-12-17 00:59:00	1.65464
2015-02-08 18:41:00	2.61971		2007-02-04	5		2014-12-17 01:09:00	1.6432
2015-02-08 18:51:00	2.49721		2007-02-05	1.6		2014-12-17 01:19:00	1.63993
2015-02-08 19:01:00	2.51818		2007-02-06	2.8		2014-12-17 01:29:00	1.63666
2015-02-08 19:11:00	2.5746		2007-02-07	4.7		2014-12-17 01:39:00	1.6334
2015-02-08 19:21:00	2.7243		2007-02-08	7.3		2014-12-17 01:49:00	1.61051
2015-02-08 19:31:00	2.79822		2007-02-09	7.2		2014-12-17 01:59:00	1.60724
2015-02-08 19:41:00	2.71465		2007-02-10	8.4		2014-12-17 02:09:00	1.60724
2015-02-08 19:51:00	2.33247		2007-02-11	10.5		2014-12-17 02:19:00	1.61051
2015-02-08 20:01:00	2.13812		2007-02-12	9.7		2014-12-17 02:29:00	1.61868
2015-02-08 20:11:00	1.9676		2007-02-13	6.9		2014-12-17 02:39:00	1.6383
2015-02-08 20:21:00	1.8162		2007-02-14	9.3		2014-12-17 02:49:00	1.63176
2015-02-08 20:31:00	1.73466		2007-02-15	7.7		2014-12-17 02:59:00	1.64647
2015-02-08 20:41:00	1.69548		2007-02-16	6.8		2014-12-17 03:09:00	1.65791
2015-02-08 20:51:00	1.81294		2007-02-17	2.8		2014-12-17 03:19:00	1.65464
2015-02-08 21:01:00	1.93182		2007-02-18	0.9		2014-12-17 03:29:00	1.63176
2015-02-08 21:11:00	2.24184		2007-02-19	1.3		2014-12-17 03:39:00	1.61705
2015-02-08 21:21:00	2.46171		2007-02-20	4.4		2014-12-17 03:49:00	1.63176
2015-02-08 21:31:00	2.50528		2007-02-21	10.2		2014-12-17 03:59:00	1.6383
2015-02-08 21:41:00	2.11217		2007-02-22	9.4		2014-12-17 04:09:00	1.64647
2015-02-08 21:51:00	1.8162		2007-02-23	8.1		2014-12-17 04:19:00	1.65301
2015-02-08 22:01:00	2.20783		2007-02-24	-1.4		2014-12-17 04:29:00	1.65464
2015-02-08 22:11:00	1.80316		2007-02-25	-1.8		2014-12-17 04:39:00	1.65137
2015-02-08 22:21:00	1.69058		2007-02-26	1		2014-12-17 04:49:00	1.65791
2015-02-08 22:31:00	1.82109		2007-02-27	1.9		2014-12-17 04:59:00	1.65301
2015-02-08 22:41:00	1.76239		2007-02-28	5.4		2014-12-17 05:09:00	1.64484
2015-02-08 22:51:00	1.78686		2007-03-01	9.4		2014-12-17 05:19:00	1.62849
2015-02-08 23:01:00	1.70364		2007-03-02	9.5		2014-12-17 05:29:00	1.63176
2015-02-08 23:11:00	1.79501		2007-03-03	9.9		2014-12-17 05:39:00	1.62195
2015-02-08 23:21:00	2.31791		2007-03-04	9.4		2014-12-17 05:49:00	1.61868
2015-02-08 23:31:00	2.19649		2007-03-05	8.2		2014-12-17 05:59:00	1.62522
2015-02-08 23:41:00	1.99524		2007-03-06	6.4		2014-12-17 06:09:00	1.62686
2015-02-08 23:51:00	1.80642		2007-03-07	7.8		2014-12-17 06:19:00	1.62686
2015-02-09 00:01:00	1.58434		2007-03-08	7		2014-12-17 06:29:00	1.6334
2015-02-09 00:11:00	1.53689		2007-03-09	6		2014-12-17 06:39:00	1.61705
2015-02-09 00:21:00	1.63993		2007-03-10	8.1		2014-12-17 06:49:00	1.62686
2015-02-09 00:31:00	1.70527		2007-03-11	6.8		2014-12-17 06:59:00	1.63666
2015-02-09 00:41:00	1.31222		2007-03-12	7.8		2014-12-17 07:09:00	1.6383
2015-02-09 00:51:00	1.8325		2007-03-13	8.8		2014-12-17 07:19:00	1.64484
2015-02-09 01:01:00	1.8162		2007-03-14	9.1		2014-12-17 07:29:00	1.64484
2015-02-09 01:11:00	2.18352		2007-03-15	10.8		2014-12-17 07:39:00	1.62686
2015-02-09 01:21:00	2.25642		2007-03-16	10.7		2014-12-17 07:49:00	1.6432
2015-02-09 01:31:00	2.4956		2007-03-17	11.9		2014-12-17 07:59:00	1.61868
2015-02-09 01:41:00	2.74359		2007-03-18	11.1		2014-12-17 08:09:00	1.62195
2015-02-09 01:51:00	2.88489		2007-03-19	11		2014-12-17 08:19:00	1.60887
2015-02-09 02:01:00	2.98588		2007-03-20	13		2014-12-17 08:29:00	1.61214
2015-02-09 02:11:00	2.90895		2007-03-21	10.9		2014-12-17 08:39:00	1.61868
2015-02-09 02:21:00	2.93941		2007-03-22	7.4		2014-12-17 08:49:00	1.62195
2015-02-09 02:31:00	2.94262		2007-03-23	7.8		2014-12-17 08:59:00	1.63013
2015-02-09 02:41:00	3.05312		2007-03-24	7.5		2014-12-17 09:09:00	1.63013
2015-02-09 02:51:00	3.17942		2007-03-25	9		2014-12-17 09:19:00	1.61378
2015-02-09 03:01:00	3.10431		2007-03-26	8.3		2014-12-17 09:29:00	1.63993
2015-02-09 03:11:00	2.69374		2007-03-27	8.7		2014-12-17 09:39:00	1.6383
2015-02-09 03:21:00	3.04352		2007-03-28	8.3		2014-12-17 09:49:00	1.64484
2015-02-09 03:31:00	2.86404		2007-03-29	8.1		2014-12-17 09:59:00	1.6383
2015-02-09 03:41:00	2.41166		2007-03-30	9.1		2014-12-17 10:09:00	1.63666
2015-02-09 03:51:00	2.75966		2007-03-31	9.4		2014-12-17 10:19:00	1.63176
2015-02-09 04:01:00	2.96345		2007-04-01	9.2		2014-12-17 10:29:00	1.6481
2015-02-09 04:11:00	3.14747		2007-04-02	11		2014-12-17 10:39:00	1.6334
2015-02-09 04:21:00	3.3581		2007-04-03	11.6		2014-12-17 10:49:00	1.63993
2015-02-09 04:31:00	3.10111		2007-04-04	11.9		2014-12-17 10:59:00	1.67915
2015-02-09 04:41:00	3.47591		2007-04-05	11.9		2014-12-17 11:09:00	1.71344
2015-02-09 04:51:00	3.61418		2007-04-06	12.9		2014-12-17 11:19:00	1.73955
2015-02-09 05:01:00	3.6237		2007-04-07	14.8		2014-12-17 11:29:00	1.72976
2015-02-09 05:11:00	3.56494		2007-04-08	13		2014-12-17 11:39:00	1.72486
2015-02-09 05:21:00	2.89933		2007-04-09	12.6		2014-12-17 11:49:00	1.70038
2015-02-09 05:31:00	3.1922		2007-04-10	14.7		2014-12-17 11:59:00	1.72813
2015-02-09 05:41:00	3.17303		2007-04-11	15.9		2014-12-17 12:09:00	1.74118
2015-02-09 05:51:00	3.25286		2007-04-12	15.5		2014-12-17 12:19:00	1.73955
2015-02-09 06:01:00	3.10111		2007-04-13	16.3		2014-12-17 12:29:00	1.80153
2015-02-09 06:11:00	3.31666		2007-04-14	17		2014-12-17 12:39:00	1.83087
2015-02-09 06:21:00	3.3581		2007-04-15	14.7		2014-12-17 12:49:00	1.85368
2015-02-09 06:31:00	3.31985		2007-04-16	13.1		2014-12-17 12:59:00	1.86508
2015-02-09 06:41:00	3.32463		2007-04-17	12.9		2014-12-17 13:09:00	1.86019
2015-02-09 06:51:00	2.8897		2007-04-18	14.1		2014-12-17 13:19:00	1.85205
2015-02-09 07:01:00	2.38904		2007-04-19	12.9		2014-12-17 13:29:00	1.85856
2015-02-09 07:11:00	2.15434		2007-04-20	12		2014-12-17 13:39:00	1.91392
2015-02-09 07:21:00	2.20621		2007-04-21	15.3		2014-12-17 13:49:00	1.98224
2015-02-09 07:31:00	2.4262		2007-04-22	15.1		2014-12-17 13:59:00	2.00012
2015-02-09 07:41:00	2.80303		2007-04-23	14.7		2014-12-17 14:09:00	2.01149
2015-02-09 07:51:00	2.47463		2007-04-24	15.8		2014-12-17 14:19:00	2.05211
2015-02-09 08:01:00	2.52625		2007-04-25	16.3		2014-12-17 14:29:00	2.05535
2015-02-09 08:11:00	2.40681		2007-04-26	16.7		2014-12-17 14:39:00	2.02124
2015-02-09 08:21:00	2.58588		2007-04-27	15.7		2014-12-17 14:49:00	2.02612
2015-02-09 08:31:00	2.63098		2007-04-28	14.9		2014-12-17 14:59:00	2.03099
2015-02-09 08:41:00	2.76769		2007-04-29	17.9		2014-12-17 15:09:00	2.01312
2015-02-09 08:51:00	2.71626		2007-04-30	17.1		2014-12-17 15:19:00	2.01962
2015-02-09 09:01:00	2.77733		2007-05-01	15.7		2014-12-17 15:29:00	1.99037
2015-02-09 09:11:00	2.92819		2007-05-02	12.6		2014-12-17 15:39:00	1.99037
2015-02-09 09:21:00	3.18901		2007-05-03	14.3		2014-12-17 15:49:00	2.02774
2015-02-09 09:31:00	3.42658		2007-05-04	15.6		2014-12-17 15:59:00	2.00824
2015-02-09 09:41:00	3.79654		2007-05-05	18.6		2014-12-17 16:09:00	2.00337
2015-02-09 09:51:00	3.611		2007-05-06	19.6		2014-12-17 16:19:00	1.98549
2015-02-09 10:01:00	3.90257		2007-05-07	19		2014-12-17 16:29:00	1.97736
2015-02-09 10:11:00	3.86461		2007-05-08	20		2014-12-17 16:39:00	1.96923
2015-02-09 10:21:00	3.84087		2007-05-09	18.8		2014-12-17 16:49:00	1.95622
2015-02-09 10:31:00	3.86777		2007-05-10	18.5		2014-12-17 16:59:00	1.95297
2015-02-09 10:41:00	3.95		2007-05-11	20.4		2014-12-17 17:09:00	1.95134
2015-02-09 10:51:00	4.00056		2007-05-12	21.3		2014-12-17 17:19:00	1.94809
2015-02-09 11:01:00	4.01951		2007-05-13	23		2014-12-17 17:29:00	1.93182
2015-02-09 11:11:00	3.80287		2007-05-14	24.1		2014-12-17 17:39:00	1.93833
2015-02-09 11:21:00	4.00214		2007-05-15	24.9		2014-12-17 17:49:00	1.92694
2015-02-09 11:31:00	4.1		2007-05-16	22.7		2014-12-17 17:59:00	1.92694
2015-02-09 11:41:00	4.31264		2007-05-17	17.9		2014-12-17 18:09:00	1.94158
2015-02-09 11:51:00	4.26544		2007-05-18	16.5		2014-12-17 18:19:00	1.93507
2015-02-09 12:01:00	4.19615		2007-05-19	15.6		2014-12-17 18:29:00	1.92857
2015-02-09 12:11:00	4.30635		2007-05-20	18.8		2014-12-17 18:39:00	1.89602
2015-02-09 12:21:00	4.35195		2007-05-21	20.4		2014-12-17 18:49:00	1.89764
2015-02-09 12:31:00	4.38967		2007-05-22	21		2014-12-17 18:59:00	1.89276
2015-02-09 12:41:00	4.54508		2007-05-23	19.6		2014-12-17 19:09:00	1.89276
2015-02-09 12:51:00	4.68922		2007-05-24	22.7		2014-12-17 19:19:00	1.9009
2015-02-09 13:01:00	4.7346		2007-05-25	23.4		2014-12-17 19:29:00	1.88625
2015-02-09 13:11:00	4.80809		2007-05-26	22.9		2014-12-17 19:39:00	1.88462
2015-02-09 13:21:00	5.06712		2007-05-27	22.4		2014-12-17 19:49:00	1.89113
2015-02-09 13:31:00	4.7737		2007-05-28	21.8		2014-12-17 19:59:00	1.89276
2015-02-09 13:41:00	4.67513		2007-05-29	19.4		2014-12-17 20:09:00	1.89764
2015-02-09 13:51:00	4.75024		2007-05-30	19.2		2014-12-17 20:19:00	1.88788
2015-02-09 14:01:00	5.01101		2007-05-31	18.4		2014-12-17 20:29:00	1.89927
2015-02-09 14:11:00	5.38741		2007-06-01	16.2		2014-12-17 20:39:00	1.86997
2015-02-09 14:21:00	5.36258		2007-06-02	21		2014-12-17 20:49:00	1.88462
2015-02-09 14:31:00	5.36103		2007-06-03	22.3		2014-12-17 20:59:00	1.88625
2015-02-09 14:41:00	5.5378		2007-06-04	22.1		2014-12-17 21:09:00	1.89602
2015-02-09 14:51:00	5.50682		2007-06-05	20.5		2014-12-17 21:19:00	1.91229
2015-02-09 15:01:00	5.50062		2007-06-06	19.5		2014-12-17 21:29:00	1.89764
2015-02-09 15:11:00	5.52231		2007-06-07	23.5		2014-12-17 21:39:00	1.90578
2015-02-09 15:21:00	5.50527		2007-06-08	22.4		2014-12-17 21:49:00	1.8895
2015-02-09 15:31:00	5.61522		2007-06-09	21.5		2014-12-17 21:59:00	1.87811
2015-02-09 15:41:00	5.31134		2007-06-10	21.3		2014-12-17 22:09:00	1.87648
2015-02-09 15:51:00	5.01257		2007-06-11	22.1		2014-12-17 22:19:00	1.87648
2015-02-09 16:01:00	4.38496		2007-06-12	23.6		2014-12-17 22:29:00	1.87322
2015-02-09 16:11:00	4.01951		2007-06-13	23.3		2014-12-17 22:39:00	1.85694
2015-02-09 16:21:00	3.63323		2007-06-14	23.6		2014-12-17 22:49:00	1.85042
2015-02-09 16:31:00	3.14427		2007-06-15	24.6		2014-12-17 22:59:00	1.83576
2015-02-09 16:41:00	2.66639		2007-06-16	23.6		2014-12-17 23:09:00	1.82924
2015-02-09 16:51:00	2.51818		2007-06-17	23.8		2014-12-17 23:19:00	1.8325
2015-02-09 17:01:00	2.32923		2007-06-18	24.7		2014-12-17 23:29:00	1.84716
2015-02-09 17:11:00	1.99362		2007-06-19	25.9		2014-12-17 23:39:00	1.85368
2015-02-09 17:21:00	1.58598		2007-06-20	26.6		2014-12-17 23:49:00	1.81783
2015-02-09 17:31:00	1.52706		2007-06-21	25.8		2014-12-17 23:59:00	1.80153
2015-02-09 17:41:00	1.45498		2007-06-22	26.4		2014-12-18 00:09:00	1.79175
2015-02-09 17:51:00	1.28922		2007-06-23	26.7		2014-12-18 00:19:00	1.78849
2015-02-09 18:01:00	1.13949		2007-06-24	25.9		2014-12-18 00:29:00	1.81131
2015-02-09 18:11:00	1.15761		2007-06-25	26.6		2014-12-18 00:39:00	1.8162
2015-02-09 18:21:00	1.04057		2007-06-26	26.9		2014-12-18 00:49:00	1.8162
2015-02-09 18:31:00	0.59512		2007-06-27	25		2014-12-18 00:59:00	1.82272
2015-02-09 18:41:00	0.69476		2007-06-28	22.6		2014-12-18 01:09:00	1.86019
2015-02-09 18:51:00	0.71964		2007-06-29	22.3		2014-12-18 01:19:00	1.87811
2015-02-09 19:01:00	0.58348		2007-06-30	23.3		2014-12-18 01:29:00	1.85205
2015-02-09 19:11:00	0.54357		2007-07-01	24.5		2014-12-18 01:39:00	1.82924
2015-02-09 19:21:00	0.51362		2007-07-02	26.9		2014-12-18 01:49:00	1.82924
2015-02-09 19:31:00	0.57351		2007-07-03	26.6		2014-12-18 01:59:00	1.80642
2015-02-09 19:41:00	0.76607		2007-07-04	27.8		2014-12-18 02:09:00	1.7836
2015-02-09 19:51:00	0.88693		2007-07-05	21.1		2014-12-18 02:19:00	1.76402
2015-02-09 20:01:00	1.01582		2007-07-06	20.4		2014-12-18 02:29:00	1.75424
2015-02-09 20:11:00	0.6848		2007-07-07	23.2		2014-12-18 02:39:00	1.73792
2015-02-09 20:21:00	0.3119		2007-07-08	26		2014-12-18 02:49:00	1.73629
2015-02-09 20:31:00	0.2785		2007-07-09	27.6		2014-12-18 02:59:00	1.7216
2015-02-09 20:41:00	0.27348		2007-07-10	25.9		2014-12-18 03:09:00	1.73139
2015-02-09 20:51:00	0.08436		2007-07-11	19.4		2014-12-18 03:19:00	1.72976
2015-02-09 21:01:00	-0.15922		2007-07-12	18.4		2014-12-18 03:29:00	1.7216
2015-02-09 21:11:00	0.10279		2007-07-13	21		2014-12-18 03:39:00	1.7265
2015-02-09 21:21:00	0.19155		2007-07-14	23.9		2014-12-18 03:49:00	1.73302
2015-02-09 21:31:00	0.04076		2007-07-15	26		2014-12-18 03:59:00	1.74771
2015-02-09 21:41:00	-0.35821		2007-07-16	29		2014-12-18 04:09:00	1.72976
2015-02-09 21:51:00	0.19489		2007-07-17	29.6		2014-12-18 04:19:00	1.75424
2015-02-09 22:01:00	0.29854		2007-07-18	30		2014-12-18 04:29:00	1.76892
2015-02-09 22:11:00	0.45368		2007-07-19	31.2		2014-12-18 04:39:00	1.77544
2015-02-09 22:21:00	0.60675		2007-07-20	32.1		2014-12-18 04:49:00	1.76729
2015-02-09 22:31:00	1.04057		2007-07-21	30.9		2014-12-18 04:59:00	1.78033
2015-02-09 22:41:00	1.0851		2007-07-22	31.4		2014-12-18 05:09:00	1.77544
2015-02-09 22:51:00	1.29251		2007-07-23	30.5		2014-12-18 05:19:00	1.76565
2015-02-09 23:01:00	1.46154		2007-07-24	31.2		2014-12-18 05:29:00	1.77218
2015-02-09 23:11:00	1.45826		2007-07-25	26.5		2014-12-18 05:39:00	1.77707
2015-02-09 23:21:00	1.66281		2007-07-26	25.4		2014-12-18 05:49:00	1.77544
2015-02-09 23:31:00	1.48612		2007-07-27	27.5		2014-12-18 05:59:00	1.75913
2015-02-09 23:41:00	1.61378		2007-07-28	29.3		2014-12-18 06:09:00	1.77707
2015-02-09 23:51:00	1.41071		2007-07-29	29.1		2014-12-18 06:19:00	1.79175
2015-02-10 00:01:00	1.32208		2007-07-30	27.4		2014-12-18 06:29:00	1.80153
2015-02-10 00:11:00	1.46973		2007-07-31	18.5		2014-12-18 06:39:00	1.80968
2015-02-10 00:21:00	1.45171		2007-08-01	17.4		2014-12-18 06:49:00	1.80968
2015-02-10 00:31:00	1.25634		2007-08-02	21.1		2014-12-18 06:59:00	1.81457
2015-02-10 00:41:00	0.78098		2007-08-03	23.2		2014-12-18 07:09:00	1.80968
2015-02-10 00:51:00	0.8555		2007-08-04	20.7		2014-12-18 07:19:00	1.81294
2015-02-10 01:01:00	0.43868		2007-08-05	16.9		2014-12-18 07:29:00	1.81131
2015-02-10 01:11:00	0.38867		2007-08-06	20		2014-12-18 07:39:00	1.7999
2015-02-10 01:21:00	0.35531		2007-08-07	21.2		2014-12-18 07:49:00	1.80479
2015-02-10 01:31:00	0.36698		2007-08-08	23.8		2014-12-18 07:59:00	1.78849
2015-02-10 01:41:00	-0.15586		2007-08-09	25.1		2014-12-18 08:09:00	1.77707
2015-02-10 01:51:00	0.07094		2007-08-10	24.5		2014-12-18 08:19:00	1.78523
2015-02-10 02:01:00	0.17146		2007-08-11	19.9		2014-12-18 08:29:00	1.80968
2015-02-10 02:11:00	0.12625		2007-08-12	20.5		2014-12-18 08:39:00	1.81294
2015-02-10 02:21:00	0.24841		2007-08-13	22.2		2014-12-18 08:49:00	1.81294
2015-02-10 02:31:00	0.22333		2007-08-14	24		2014-12-18 08:59:00	1.79012
2015-02-10 02:41:00	0.25343		2007-08-15	24.9		2014-12-18 09:09:00	1.79501
2015-02-10 02:51:00	0.53193		2007-08-16	25.4		2014-12-18 09:19:00	1.78686
2015-02-10 03:01:00	0.5053		2007-08-17	26.2		2014-12-18 09:29:00	1.78033
2015-02-10 03:11:00	0.35864		2007-08-18	25.4		2014-12-18 09:39:00	1.78196
2015-02-10 03:21:00	-0.64101		2007-08-19	25.5		2014-12-18 09:49:00	1.7836
2015-02-10 03:31:00	-0.15249		2007-08-20	25.4		2014-12-18 09:59:00	1.78849
2015-02-10 03:41:00	-0.06503		2007-08-21	26.9		2014-12-18 10:09:00	1.79338
2015-02-10 03:51:00	-0.03815		2007-08-22	27.3		2014-12-18 10:19:00	1.79175
2015-02-10 04:01:00	-0.11043		2007-08-23	29		2014-12-18 10:29:00	1.78523
2015-02-10 04:11:00	0.00048		2007-08-24	28.9		2014-12-18 10:39:00	1.80316
2015-02-10 04:21:00	0.21831		2007-08-25	29.2		2014-12-18 10:49:00	1.81131
2015-02-10 04:31:00	-0.5528		2007-08-26	26.1		2014-12-18 10:59:00	1.81131
2015-02-10 04:41:00	-0.67667		2007-08-27	23.1		2014-12-18 11:09:00	1.82109
2015-02-10 04:51:00	-1.11838		2007-08-28	23.7		2014-12-18 11:19:00	1.82435
2015-02-10 05:01:00	-1.46707		2007-08-29	24.4		2014-12-18 11:29:00	1.90416
2015-02-10 05:11:00	-1.23836		2007-08-30	25.5		2014-12-18 11:39:00	1.93995
2015-02-10 05:21:00	-1.09099		2007-08-31	23.7		2014-12-18 11:49:00	1.95459
2015-02-10 05:31:00	-0.8485		2007-09-01	21.1		2014-12-18 11:59:00	1.92368
2015-02-10 05:41:00	-0.38524		2007-09-02	19		2014-12-18 12:09:00	1.94971
2015-02-10 05:51:00	-0.67497		2007-09-03	19.3		2014-12-18 12:19:00	1.99524
2015-02-10 06:01:00	-0.52568		2007-09-04	19.8		2014-12-18 12:29:00	1.97248
2015-02-10 06:11:00	-0.62403		2007-09-05	14		2014-12-18 12:39:00	1.98224
2015-02-10 06:21:00	-0.95937		2007-09-06	12.9		2014-12-18 12:49:00	1.98874
2015-02-10 06:31:00	-0.9662		2007-09-07	14.3		2014-12-18 12:59:00	1.98386
2015-02-10 06:41:00	-0.75486		2007-09-08	14.6		2014-12-18 13:09:00	1.99849
2015-02-10 06:51:00	-1.19205		2007-09-09	17		2014-12-18 13:19:00	2.02449
2015-02-10 07:01:00	-1.18519		2007-09-10	16.2		2014-12-18 13:29:00	2.02124
2015-02-10 07:11:00	-1.13721		2007-09-11	13.9		2014-12-18 13:39:00	2.00824
2015-02-10 07:21:00	-1.26068		2007-09-12	14.3		2014-12-18 13:49:00	2.04886
2015-02-10 07:31:00	-1.27956		2007-09-13	17.9		2014-12-18 13:59:00	2.0586
2015-02-10 07:41:00	-1.14749		2007-09-14	16.1		2014-12-18 14:09:00	2.04886
2015-02-10 07:51:00	-0.75997		2007-09-15	18.2		2014-12-18 14:19:00	2.04723
2015-02-10 08:01:00	-0.79911		2007-09-16	19		2014-12-18 14:29:00	2.0586
2015-02-10 08:11:00	-0.90988		2007-09-17	17		2014-12-18 14:39:00	2.05211
2015-02-10 08:21:00	-1.03796		2007-09-18	20.8		2014-12-18 14:49:00	2.05535
2015-02-10 08:31:00	-0.95083		2007-09-19	17.3		2014-12-18 14:59:00	2.01149
2015-02-10 08:41:00	-0.98157		2007-09-20	13.2		2014-12-18 15:09:00	2.01799
2015-02-10 08:51:00	-1.39819		2007-09-21	13.8		2014-12-18 15:19:00	2.00499
2015-02-10 09:01:00	-1.49293		2007-09-22	13.7		2014-12-18 15:29:00	1.97086
2015-02-10 09:11:00	-1.82844		2007-09-23	14.5		2014-12-18 15:39:00	1.96923
2015-02-10 09:21:00	-1.39819		2007-09-24	15		2014-12-18 15:49:00	1.97248
2015-02-10 09:31:00	-1.05164		2007-09-25	15.6		2014-12-18 15:59:00	1.95134
2015-02-10 09:41:00	-1.08243		2007-09-26	16.1		2014-12-18 16:09:00	1.93019
2015-02-10 09:51:00	-0.55958		2007-09-27	19.3		2014-12-18 16:19:00	1.92206
2015-02-10 10:01:00	-0.09361		2007-09-28	19.6		2014-12-18 16:29:00	1.88788
2015-02-10 10:11:00	0.01391		2007-09-29	19.6		2014-12-18 16:39:00	1.86345
2015-02-10 10:21:00	-0.06335		2007-09-30	18.8		2014-12-18 16:49:00	1.83087
2015-02-10 10:31:00	-0.05831		2007-10-01	18.4		2014-12-18 16:59:00	1.79338
2015-02-10 10:41:00	0.17816		2007-10-02	17.1		2014-12-18 17:09:00	1.75587
2015-02-10 10:51:00	0.26513		2007-10-03	16.3		2014-12-18 17:19:00	1.72976
2015-02-10 11:01:00	0.34195		2007-10-04	16.6		2014-12-18 17:29:00	1.7118
2015-02-10 11:11:00	0.36031		2007-10-05	20		2014-12-18 17:39:00	1.69548
2015-02-10 11:21:00	0.42702		2007-10-06	19.1		2014-12-18 17:49:00	1.69711
2015-02-10 11:31:00	0.59512		2007-10-07	14.7		2014-12-18 17:59:00	1.68078
2015-02-10 11:41:00	0.76109		2007-10-08	13.3		2014-12-18 18:09:00	1.66281
2015-02-10 11:51:00	0.75446		2007-10-09	14.7		2014-12-18 18:19:00	1.64974
2015-02-10 12:01:00	0.82073		2007-10-10	12.2		2014-12-18 18:29:00	1.65464
2015-02-10 12:11:00	0.92497		2007-10-11	13.5		2014-12-18 18:39:00	1.66771
2015-02-10 12:21:00	0.92331		2007-10-12	13.9		2014-12-18 18:49:00	1.64647
2015-02-10 12:31:00	1.07191		2007-10-13	13.4		2014-12-18 18:59:00	1.63176
2015-02-10 12:41:00	1.29908		2007-10-14	8.1		2014-12-18 19:09:00	1.63666
2015-02-10 12:51:00	1.40579		2007-10-15	7.2		2014-12-18 19:19:00	1.67588
2015-02-10 13:01:00	1.4599		2007-10-16	9.1		2014-12-18 19:29:00	1.70038
2015-02-10 13:11:00	1.59416		2007-10-17	11.1		2014-12-18 19:39:00	1.68241
2015-02-10 13:21:00	1.73955		2007-10-18	11.9		2014-12-18 19:49:00	1.65627
2015-02-10 13:31:00	1.90416		2007-10-19	11.5		2014-12-18 19:59:00	1.59579
2015-02-10 13:41:00	1.98386		2007-10-20	8.4		2014-12-18 20:09:00	1.58434
2015-02-10 13:51:00	2.21593		2007-10-21	5.9		2014-12-18 20:19:00	1.5418
2015-02-10 14:01:00	2.29364		2007-10-22	7		2014-12-18 20:29:00	1.51233
2015-02-10 14:11:00	2.41489		2007-10-23	9.3		2014-12-18 20:39:00	1.54016
2015-02-10 14:21:00	2.52302		2007-10-24	8.7		2014-12-18 20:49:00	1.53361
2015-02-10 14:31:00	2.59394		2007-10-25	8		2014-12-18 20:59:00	1.52706
2015-02-10 14:41:00	2.64547		2007-10-26	9.1		2014-12-18 21:09:00	1.47793
2015-02-10 14:51:00	2.77573		2007-10-27	10.1		2014-12-18 21:19:00	1.4894
2015-02-10 15:01:00	2.74037		2007-10-28	10.6		2014-12-18 21:29:00	1.46973
2015-02-10 15:11:00	2.74037		2007-10-29	10.4		2014-12-18 21:39:00	1.43203
2015-02-10 15:21:00	2.7468		2007-10-30	11.1		2014-12-18 21:49:00	1.40251
2015-02-10 15:31:00	2.67926		2007-10-31	12.1		2014-12-18 21:59:00	1.40087
2015-02-10 15:41:00	2.71786		2007-11-01	11.5		2014-12-18 22:09:00	1.36969
2015-02-10 15:51:00	2.89131		2007-11-02	11.6		2014-12-18 22:19:00	1.32701
2015-02-10 16:01:00	2.96505		2007-11-03	9.6		2014-12-18 22:29:00	1.30236
2015-02-10 16:11:00	2.87687		2007-11-04	11		2014-12-18 22:39:00	1.31058
2015-02-10 16:21:00	2.9314		2007-11-05	7.7		2014-12-18 22:49:00	1.27114
2015-02-10 16:31:00	2.87206		2007-11-06	3.7		2014-12-18 22:59:00	1.27443
2015-02-10 16:41:00	2.87366		2007-11-07	4.9		2014-12-18 23:09:00	1.2399
2015-02-10 16:51:00	2.84157		2007-11-08	5.8		2014-12-18 23:19:00	1.25634
2015-02-10 17:01:00	2.79982		2007-11-09	5.8		2014-12-18 23:29:00	1.24154
2015-02-10 17:11:00	2.95864		2007-11-10	5.5		2014-12-18 23:39:00	1.20206
2015-02-10 17:21:00	2.93781		2007-11-11	5.5		2014-12-18 23:49:00	1.18889
2015-02-10 17:31:00	2.91536		2007-11-12	4.9		2014-12-18 23:59:00	1.18889
2015-02-10 17:41:00	2.96345		2007-11-13	4.2		2014-12-19 00:09:00	1.17572
2015-02-10 17:51:00	2.8897		2007-11-14	3.5		2014-12-19 00:19:00	1.18066
2015-02-10 18:01:00	3.02431		2007-11-15	3.9		2014-12-19 00:29:00	1.17572
2015-02-10 18:11:00	3.16185		2007-11-16	3.8		2014-12-19 00:39:00	1.15926
2015-02-10 18:21:00	3.12989		2007-11-17	3.8		2014-12-19 00:49:00	1.16584
2015-02-10 18:31:00	2.99068		2007-11-18	3.5		2014-12-19 00:59:00	1.16584
2015-02-10 18:41:00	2.94422		2007-11-19	3.1		2014-12-19 01:09:00	1.1642
2015-02-10 18:51:00	2.8881		2007-11-20	2.4		2014-12-19 01:19:00	1.14608
2015-02-10 19:01:00	2.933		2007-11-21	0.3		2014-12-19 01:29:00	1.13784
2015-02-10 19:11:00	2.90735		2007-11-22	0.7		2014-12-19 01:39:00	1.13784
2015-02-10 19:21:00	2.85922		2007-11-23	1.3		2014-12-19 01:49:00	1.14773
2015-02-10 19:31:00	2.45041		2007-11-24	1.3		2014-12-19 01:59:00	1.13949
2015-02-10 19:41:00	2.64386		2007-11-25	1.7		2014-12-19 02:09:00	1.12631
2015-02-10 19:51:00	2.4714		2007-11-26	5.2		2014-12-19 02:19:00	1.12961
2015-02-10 20:01:00	2.39389		2007-11-27	3.1		2014-12-19 02:29:00	1.13949
2015-02-10 20:11:00	2.36642		2007-11-28	2.6		2014-12-19 02:39:00	1.12301
2015-02-10 20:21:00	2.33085		2007-11-29	-0.7		2014-12-19 02:49:00	1.12301
2015-02-10 20:31:00	1.91555		2007-11-30	1.6		2014-12-19 02:59:00	1.0884
2015-02-10 20:41:00	1.93995		2007-12-01	4		2014-12-19 03:09:00	1.08016
2015-02-10 20:51:00	1.87159		2007-12-02	3.5		2014-12-19 03:19:00	1.05542
2015-02-10 21:01:00	1.70201		2007-12-03	3.2		2014-12-19 03:29:00	1.04882
2015-02-10 21:11:00	1.77544		2007-12-04	6.6		2014-12-19 03:39:00	1.00261
2015-02-10 21:21:00	1.6334		2007-12-05	6.8		2014-12-19 03:49:00	1.02737
2015-02-10 21:31:00	1.69384		2007-12-06	6.5		2014-12-19 03:59:00	0.99435
2015-02-10 21:41:00	1.72323		2007-12-07	4.7		2014-12-19 04:09:00	0.97619
2015-02-10 21:51:00	1.70038		2007-12-08	3.7		2014-12-19 04:19:00	1.00921
2015-02-10 22:01:00	1.73955		2007-12-09	4.1		2014-12-19 04:29:00	0.99435
2015-02-10 22:11:00	1.62849		2007-12-10	3.8		2014-12-19 04:39:00	0.97454
2015-02-10 22:21:00	1.12137		2007-12-11	4.9		2014-12-19 04:49:00	0.96132
2015-02-10 22:31:00	1.281		2007-12-12	4.9		2014-12-19 04:59:00	0.96793
2015-02-10 22:41:00	0.86874		2007-12-13	4.5		2014-12-19 05:09:00	0.92827
2015-02-10 22:51:00	0.69144		2007-12-14	-1.8		2014-12-19 05:19:00	0.92827
2015-02-10 23:01:00	0.97619		2007-12-15	-2.9		2014-12-19 05:29:00	0.92331
2015-02-10 23:11:00	-0.10033		2007-12-16	-0.8		2014-12-19 05:39:00	0.89686
2015-02-10 23:21:00	0.11117		2007-12-17	-1.6		2014-12-19 05:49:00	0.89024
2015-02-10 23:31:00	-0.22154		2007-12-18	-2.9		2014-12-19 05:59:00	0.89686
2015-02-10 23:41:00	0.07933		2007-12-19	-4		2014-12-19 06:09:00	0.89355
2015-02-10 23:51:00	0.30689		2007-12-20	-3		2014-12-19 06:19:00	0.91009
2015-02-11 00:01:00	0.00048		2007-12-21	-1.1		2014-12-19 06:29:00	0.91174
2015-02-11 00:11:00	0.11955		2007-12-22	-1.6		2014-12-19 06:39:00	0.90016
2015-02-11 00:21:00	-0.0768		2007-12-23	-2.2		2014-12-19 06:49:00	0.87866
2015-02-11 00:31:00	0.06759		2007-12-24	-3.3		2014-12-19 06:59:00	0.86543
2015-02-11 00:41:00	0.14468		2007-12-25	-4.7		2014-12-19 07:09:00	0.86212
2015-02-11 00:51:00	0.07094		2007-12-26	-3.2		2014-12-19 07:19:00	0.86212
2015-02-11 01:01:00	0.13128		2007-12-27	-0.5		2014-12-19 07:29:00	0.87535
2015-02-11 01:11:00	-0.18111		2007-12-28	-3		2014-12-19 07:39:00	0.87039
2015-02-11 01:21:00	-0.55449		2007-12-29	-4.4		2014-12-19 07:49:00	0.88859
2015-02-11 01:31:00	-0.39031		2007-12-30	-6.3		2014-12-19 07:59:00	0.87866
2015-02-11 01:41:00	-0.24008		2007-12-31	-5.4		2014-12-19 08:09:00	0.89024
2015-02-11 01:51:00	-0.51891		2008-01-01	-3.6		2014-12-19 08:19:00	0.88197
2015-02-11 02:01:00	-0.7889		2008-01-02	-1.5		2014-12-19 08:29:00	0.88362
2015-02-11 02:11:00	-0.89964		2008-01-03	-4.1		2014-12-19 08:39:00	0.8952
2015-02-11 02:21:00	-0.97132		2008-01-04	-7.7		2014-12-19 08:49:00	0.88528
2015-02-11 02:31:00	-0.81784		2008-01-05	-10.4		2014-12-19 08:59:00	0.91339
2015-02-11 02:41:00	-0.56636		2008-01-06	-9.1		2014-12-19 09:09:00	0.94976
2015-02-11 02:51:00	-0.49858		2008-01-07	-3.5		2014-12-19 09:19:00	0.97949
2015-02-11 03:01:00	-0.34132		2008-01-08	-2.2		2014-12-19 09:29:00	1.00756
2015-02-11 03:11:00	-0.77018		2008-01-09	-7.1		2014-12-19 09:39:00	1.03562
2015-02-11 03:21:00	-1.08243		2008-01-10	-6.2		2014-12-19 09:49:00	1.095
2015-02-11 03:31:00	-0.8468		2008-01-11	-6		2014-12-19 09:59:00	1.14278
2015-02-11 03:41:00	-0.72765		2008-01-12	-6.8		2014-12-19 10:09:00	1.17078
2015-02-11 03:51:00	-0.68176		2008-01-13	-7.1		2014-12-19 10:19:00	1.19712
2015-02-11 04:01:00	-0.81614		2008-01-14	-6.5		2014-12-19 10:29:00	1.23661
2015-02-11 04:11:00	-0.70215		2008-01-15	-1.6		2014-12-19 10:39:00	1.26785
2015-02-11 04:21:00	-0.50028		2008-01-16	-0.9		2014-12-19 10:49:00	1.29415
2015-02-11 04:31:00	-0.6495		2008-01-17	0.1		2014-12-19 10:59:00	1.31387
2015-02-11 04:41:00	-0.67837		2008-01-18	0.2		2014-12-19 11:09:00	1.35656
2015-02-11 04:51:00	-1.16634		2008-01-19	0.3		2014-12-19 11:19:00	1.39759
2015-02-11 05:01:00	-1.28643		2008-01-20	4.4		2014-12-19 11:29:00	1.41891
2015-02-11 05:11:00	-0.99865		2008-01-21	3.7		2014-12-19 11:39:00	1.44679
2015-02-11 05:21:00	-0.85191		2008-01-22	4		2014-12-19 11:49:00	1.43859
2015-02-11 05:31:00	-0.93718		2008-01-23	4.8		2014-12-19 11:59:00	1.44023
2015-02-11 05:41:00	-0.86043		2008-01-24	0.7		2014-12-19 12:09:00	1.45662
2015-02-11 05:51:00	-0.63761		2008-01-25	-0.3		2014-12-19 12:19:00	1.47301
2015-02-11 06:01:00	-0.76677		2008-01-26	3.6		2014-12-19 12:29:00	1.55489
2015-02-11 06:11:00	-0.70385		2008-01-27	6.2		2014-12-19 12:39:00	1.59416
2015-02-11 06:21:00	-0.45119		2008-01-28	4.4		2014-12-19 12:49:00	1.5778
2015-02-11 06:31:00	-0.77698		2008-01-29	1.4		2014-12-19 12:59:00	1.57125
2015-02-11 06:41:00	-1.38098		2008-01-30	0.3		2014-12-19 13:09:00	1.56798
2015-02-11 06:51:00	-1.12351		2008-01-31	1.9		2014-12-19 13:19:00	1.57453
2015-02-11 07:01:00	-1.50844		2008-02-01	3.3		2014-12-19 13:29:00	1.62032
2015-02-11 07:11:00	-1.4154		2008-02-02	1.8		2014-12-19 13:39:00	1.63176
2015-02-11 07:21:00	-1.41368		2008-02-03	4.9		2014-12-19 13:49:00	1.66281
2015-02-11 07:31:00	-1.56884		2008-02-04	5.9		2014-12-19 13:59:00	1.64974
2015-02-11 07:41:00	-1.78682		2008-02-05	4.3		2014-12-19 14:09:00	1.64157
2015-02-11 07:51:00	-2.39005		2008-02-06	3.9		2014-12-19 14:19:00	1.66608
2015-02-11 08:01:00	-2.3883		2008-02-07	4.1		2014-12-19 14:29:00	1.68078
2015-02-11 08:11:00	-1.90656		2008-02-08	3.9		2014-12-19 14:39:00	1.66444
2015-02-11 08:21:00	-2.00221		2008-02-09	2		2014-12-19 14:49:00	1.68241
2015-02-11 08:31:00	-1.64313		2008-02-10	0.4		2014-12-19 14:59:00	1.71507
2015-02-11 08:41:00	-1.26583		2008-02-11	-0.5		2014-12-19 15:09:00	1.70201
2015-02-11 08:51:00	-1.52052		2008-02-12	-0.8		2014-12-19 15:19:00	1.70527
2015-02-11 09:01:00	-1.78855		2008-02-13	-0.8		2014-12-19 15:29:00	1.77218
2015-02-11 09:11:00	-1.83364		2008-02-14	3.5		2014-12-19 15:39:00	1.75913
2015-02-11 09:21:00	-1.83711		2008-02-15	1.9		2014-12-19 15:49:00	1.72813
2015-02-11 09:31:00	-1.8753		2008-02-16	-1.2		2014-12-19 15:59:00	1.75097
2015-02-11 09:41:00	-2.37427		2008-02-17	-3.4		2014-12-19 16:09:00	1.73302
2015-02-11 09:51:00	-2.14164		2008-02-18	-0.5		2014-12-19 16:19:00	1.71833
2015-02-11 10:01:00	-1.82323		2008-02-19	4.7		2014-12-19 16:29:00	1.73466
2015-02-11 10:11:00	-1.505		2008-02-20	4.9		2014-12-19 16:39:00	1.72323
2015-02-11 10:21:00	-1.41368		2008-02-21	5.6		2014-12-19 16:49:00	1.73466
2015-02-11 10:31:00	-0.98669		2008-02-22	9.7		2014-12-19 16:59:00	1.75097
2015-02-11 10:41:00	-0.95595		2008-02-23	8.8		2014-12-19 17:09:00	1.76729
2015-02-11 10:51:00	-0.75827		2008-02-24	11.3		2014-12-19 17:19:00	1.76565
2015-02-11 11:01:00	-0.794		2008-02-25	8.8		2014-12-19 17:29:00	1.7526
2015-02-11 11:11:00	-0.48504		2008-02-26	12.7		2014-12-19 17:39:00	1.74608
2015-02-11 11:21:00	-0.38862		2008-02-27	10.1		2014-12-19 17:49:00	1.68731
2015-02-11 11:31:00	-0.56127		2008-02-28	12.8		2014-12-19 17:59:00	1.67261
2015-02-11 11:41:00	-0.58501		2008-02-29	9		2014-12-19 18:09:00	1.69548
2015-02-11 11:51:00	-0.26706		2008-03-01	8.6		2014-12-19 18:19:00	1.76076
2015-02-11 12:01:00	-0.31262		2008-03-02	8.9		2014-12-19 18:29:00	1.74445
2015-02-11 12:11:00	-0.16259		2008-03-03	13.9		2014-12-19 18:39:00	1.76892
2015-02-11 12:21:00	0.12793		2008-03-04	10.5		2014-12-19 18:49:00	1.77381
2015-02-11 12:31:00	0.09777		2008-03-05	5.3		2014-12-19 18:59:00	1.74934
2015-02-11 12:41:00	0.24173		2008-03-06	4.9		2014-12-19 19:09:00	1.74934
2015-02-11 12:51:00	0.47033		2008-03-07	7.2		2014-12-19 19:19:00	1.74445
2015-02-11 13:01:00	0.69144		2008-03-08	9.3		2014-12-19 19:29:00	1.7999
2015-02-11 13:11:00	0.8108		2008-03-09	9		2014-12-19 19:39:00	1.78849
2015-02-11 13:21:00	0.93984		2008-03-10	8.7		2014-12-19 19:49:00	1.80479
2015-02-11 13:31:00	1.26785		2008-03-11	9.8		2014-12-19 19:59:00	1.82598
2015-02-11 13:41:00	1.61705		2008-03-12	12.6		2014-12-19 20:09:00	1.8325
2015-02-11 13:51:00	1.78033		2008-03-13	9.6		2014-12-19 20:19:00	1.85042
2015-02-11 14:01:00	2.00499		2008-03-14	8.2		2014-12-19 20:29:00	1.83087
2015-02-11 14:11:00	1.94646		2008-03-15	9.8		2014-12-19 20:39:00	1.83902
2015-02-11 14:21:00	2.20945		2008-03-16	9.3		2014-12-19 20:49:00	1.82924
2015-02-11 14:31:00	2.29364		2008-03-17	9.5		2014-12-19 20:59:00	1.85042
2015-02-11 14:41:00	2.51818		2008-03-18	7.8		2014-12-19 21:09:00	1.83902
2015-02-11 14:51:00	2.64547		2008-03-19	4.8		2014-12-19 21:19:00	1.85042
2015-02-11 15:01:00	2.72269		2008-03-20	5.2		2014-12-19 21:29:00	1.84064
2015-02-11 15:11:00	2.75644		2008-03-21	7.5		2014-12-19 21:39:00	1.86182
2015-02-11 15:21:00	2.74359		2008-03-22	8.6		2014-12-19 21:49:00	1.86671
2015-02-11 15:31:00	2.81588		2008-03-23	12.5		2014-12-19 21:59:00	1.85205
2015-02-11 15:41:00	2.83675		2008-03-24	7.9		2014-12-19 22:09:00	1.84879
2015-02-11 15:51:00	2.71947		2008-03-25	5.6		2014-12-19 22:19:00	1.85531
2015-02-11 16:01:00	2.61971		2008-03-26	4.5		2014-12-19 22:29:00	1.86345
2015-02-11 16:11:00	2.56493		2008-03-27	7.9		2014-12-19 22:39:00	1.89113
2015-02-11 16:21:00	2.60682		2008-03-28	11.4		2014-12-19 22:49:00	1.90253
2015-02-11 16:31:00	2.58749		2008-03-29	10.6		2014-12-19 22:59:00	1.95459
2015-02-11 16:41:00	2.4262		2008-03-30	10.3		2014-12-19 23:09:00	2.03424
2015-02-11 16:51:00	2.19324		2008-03-31	11.1		2014-12-19 23:19:00	2.00499
2015-02-11 17:01:00	2.21593		2008-04-01	8.7		2014-12-19 23:29:00	2.00337
2015-02-11 17:11:00	2.31629		2008-04-02	8.5		2014-12-19 23:39:00	1.99037
2015-02-11 17:21:00	2.21107		2008-04-03	9.2		2014-12-19 23:49:00	1.97573
2015-02-11 17:31:00	2.09269		2008-04-04	11.8		2014-12-19 23:59:00	1.97248
2015-02-11 17:41:00	2.08783		2008-04-05	10.6		2014-12-20 00:09:00	1.98711
2015-02-11 17:51:00	2.07322		2008-04-06	9.3		2014-12-20 00:19:00	1.99524
2015-02-11 18:01:00	1.93019		2008-04-07	13.4		2014-12-20 00:29:00	2.04074
2015-02-11 18:11:00	2.03424		2008-04-08	13.4		2014-12-20 00:39:00	2.05698
2015-02-11 18:21:00	2.19162		2008-04-09	14.8		2014-12-20 00:49:00	2.05211
2015-02-11 18:31:00	2.30011		2008-04-10	14.4		2014-12-20 00:59:00	2.07646
2015-02-11 18:41:00	2.09269		2008-04-11	14.4		2014-12-20 01:09:00	2.07484
2015-02-11 18:51:00	2.17866		2008-04-12	16.1		2014-12-20 01:19:00	2.09269
2015-02-11 19:01:00	2.22079		2008-04-13	15.4		2014-12-20 01:29:00	2.0862
2015-02-11 19:11:00	1.94809		2008-04-14	13.3		2014-12-20 01:39:00	2.0651
2015-02-11 19:21:00	1.8895		2008-04-15	10.6		2014-12-20 01:49:00	2.01799
2015-02-11 19:31:00	1.78523		2008-04-16	10.7		2014-12-20 01:59:00	1.99524
2015-02-11 19:41:00	1.84553		2008-04-17	12.9		2014-12-20 02:09:00	1.99849
2015-02-11 19:51:00	1.95947		2008-04-18	13.5		2014-12-20 02:19:00	1.98711
2015-02-11 20:01:00	2.22565		2008-04-19	13		2014-12-20 02:29:00	1.98386
2015-02-11 20:11:00	2.35995		2008-04-20	15.7		2014-12-20 02:39:00	1.99687
2015-02-11 20:21:00	2.21593		2008-04-21	18.1		2014-12-20 02:49:00	2.00987
2015-02-11 20:31:00	2.16731		2008-04-22	15.7		2014-12-20 02:59:00	2.01637
2015-02-11 20:41:00	1.82761		2008-04-23	14.3		2014-12-20 03:09:00	2.02287
2015-02-11 20:51:00	1.43531		2008-04-24	11.3		2014-12-20 03:19:00	2.01312
2015-02-11 21:01:00	1.63176		2008-04-25	11.1		2014-12-20 03:29:00	2.03586
2015-02-11 21:11:00	1.84716		2008-04-26	12.4		2014-12-20 03:39:00	2.07159
2015-02-11 21:21:00	1.77381		2008-04-27	13.9		2014-12-20 03:49:00	2.05535
2015-02-11 21:31:00	1.83413		2008-04-28	14.5		2014-12-20 03:59:00	2.06672
2015-02-11 21:41:00	1.96598		2008-04-29	13.8		2014-12-20 04:09:00	2.08296
2015-02-11 21:51:00	1.98874		2008-04-30	13.9		2014-12-20 04:19:00	2.06672
2015-02-11 22:01:00	1.94321		2008-05-01	17.3		2014-12-20 04:29:00	2.08458
2015-02-11 22:11:00	1.98874		2008-05-02	16		2014-12-20 04:39:00	2.10081
2015-02-11 22:21:00	1.94971		2008-05-03	16		2014-12-20 04:49:00	2.11704
2015-02-11 22:31:00	1.78523		2008-05-04	15.7		2014-12-20 04:59:00	2.10568
2015-02-11 22:41:00	1.15761		2008-05-05	13.1		2014-12-20 05:09:00	2.14137
2015-02-11 22:51:00	1.07191		2008-05-06	15.7		2014-12-20 05:19:00	2.1365
2015-02-11 23:01:00	0.75778		2008-05-07	15.7		2014-12-20 05:29:00	2.14785
2015-02-11 23:11:00	0.69973		2008-05-08	16.2		2014-12-20 05:39:00	2.17866
2015-02-11 23:21:00	0.87039		2008-05-09	16.2		2014-12-20 05:49:00	2.18838
2015-02-11 23:31:00	0.83563		2008-05-10	12.7		2014-12-20 05:59:00	2.19487
2015-02-11 23:41:00	0.90347		2008-05-11	13.4		2014-12-20 06:09:00	2.19811
2015-02-11 23:51:00	0.84557		2008-05-12	15.1		2014-12-20 06:19:00	2.22079
2015-02-12 00:01:00	0.72793		2008-05-13	16.7		2014-12-20 06:29:00	2.20297
2015-02-12 00:11:00	0.78429		2008-05-14	17.6		2014-12-20 06:39:00	2.21107
2015-02-12 00:21:00	0.8406		2008-05-15	18.1		2014-12-20 06:49:00	2.22889
2015-02-12 00:31:00	0.83729		2008-05-16	18.3		2014-12-20 06:59:00	2.21107
2015-02-12 00:41:00	0.80417		2008-05-17	20.8		2014-12-20 07:09:00	2.23213
2015-02-12 00:51:00	0.52028		2008-05-18	22.6		2014-12-20 07:19:00	2.19649
2015-02-12 01:01:00	0.472		2008-05-19	22.8		2014-12-20 07:29:00	2.17704
2015-02-12 01:11:00	0.23504		2008-05-20	23.2		2014-12-20 07:39:00	2.12839
2015-02-12 01:21:00	0.09441		2008-05-21	21		2014-12-20 07:49:00	2.11217
2015-02-12 01:31:00	0.1882		2008-05-22	18.3		2014-12-20 07:59:00	2.07809
2015-02-12 01:41:00	0.17649		2008-05-23	18.9		2014-12-20 08:09:00	2.05211
2015-02-12 01:51:00	-0.05831		2008-05-24	20.4		2014-12-20 08:19:00	2.03424
2015-02-12 02:01:00	-0.20469		2008-05-25	21.4		2014-12-20 08:29:00	2.03424
2015-02-12 02:11:00	-0.33119		2008-05-26	22.5		2014-12-20 08:39:00	2.01962
2015-02-12 02:21:00	-0.62403		2008-05-27	21.8		2014-12-20 08:49:00	2.00662
2015-02-12 02:31:00	-0.54941		2008-05-28	26		2014-12-20 08:59:00	1.96923
2015-02-12 02:41:00	-0.50366		2008-05-29	18.4		2014-12-20 09:09:00	1.96435
2015-02-12 02:51:00	-0.31599		2008-05-30	21.2		2014-12-20 09:19:00	1.94809
2015-02-12 03:01:00	-0.17774		2008-05-31	22.3		2014-12-20 09:29:00	1.93182
2015-02-12 03:11:00	0.16812		2008-06-01	24.2		2014-12-20 09:39:00	1.92368
2015-02-12 03:21:00	-0.10874		2008-06-02	21.5		2014-12-20 09:49:00	1.92368
2015-02-12 03:31:00	0.05921		2008-06-03	20.5		2014-12-20 09:59:00	1.9367
2015-02-12 03:41:00	0.0743		2008-06-04	21.3		2014-12-20 10:09:00	1.96435
2015-02-12 03:51:00	-0.47827		2008-06-05	18.5		2014-12-20 10:19:00	1.95947
2015-02-12 04:01:00	-0.59688		2008-06-06	16.6		2014-12-20 10:29:00	1.97411
2015-02-12 04:11:00	-0.50875		2008-06-07	16.9		2014-12-20 10:39:00	2.01312
2015-02-12 04:21:00	-0.18616		2008-06-08	17.3		2014-12-20 10:49:00	2.04561
2015-02-12 04:31:00	0.0743		2008-06-09	20.4		2014-12-20 10:59:00	2.06185
2015-02-12 04:41:00	0.60509		2008-06-10	21.4		2014-12-20 11:09:00	2.06672
2015-02-12 04:51:00	0.62336		2008-06-11	21.5		2014-12-20 11:19:00	2.06347
2015-02-12 05:01:00	0.69808		2008-06-12	20.9		2014-12-20 11:29:00	2.06835
2015-02-12 05:11:00	0.70969		2008-06-13	19.4		2014-12-20 11:39:00	2.08133
2015-02-12 05:21:00	0.95141		2008-06-14	19.2		2014-12-20 11:49:00	2.08133
2015-02-12 05:31:00	0.90513		2008-06-15	19.6		2014-12-20 11:59:00	2.09756
2015-02-12 05:41:00	0.46201		2008-06-16	19.8		2014-12-20 12:09:00	2.07646
2015-02-12 05:51:00	0.36031		2008-06-17	22		2014-12-20 12:19:00	2.07809
2015-02-12 06:01:00	0.2785		2008-06-18	22.9		2014-12-20 12:29:00	2.10243
2015-02-12 06:11:00	0.09777		2008-06-19	22.2		2014-12-20 12:39:00	2.05211
2015-02-12 06:21:00	0.44201		2008-06-20	23.8		2014-12-20 12:49:00	2.02287
2015-02-12 06:31:00	0.57018		2008-06-21	25		2014-12-20 12:59:00	2.02937
2015-02-12 06:41:00	0.78761		2008-06-22	25.9		2014-12-20 13:09:00	2.19
2015-02-12 06:51:00	0.47033		2008-06-23	26.7		2014-12-20 13:19:00	2.16083
2015-02-12 07:01:00	0.14802		2008-06-24	27.2		2014-12-20 13:29:00	2.16407
2015-02-12 07:11:00	0.10447		2008-06-25	26.8		2014-12-20 13:39:00	2.20459
2015-02-12 07:21:00	0.5053		2008-06-26	27.4		2014-12-20 13:49:00	2.28717
2015-02-12 07:31:00	0.47866		2008-06-27	26.5		2014-12-20 13:59:00	2.27908
2015-02-12 07:41:00	0.6433		2008-06-28	26.6		2014-12-20 14:09:00	2.22727
2015-02-12 07:51:00	0.80417		2008-06-29	25.2		2014-12-20 14:19:00	2.20621
2015-02-12 08:01:00	0.9894		2008-06-30	25.6		2014-12-20 14:29:00	2.16083
2015-02-12 08:11:00	1.10818		2008-07-01	26		2014-12-20 14:39:00	2.1592
2015-02-12 08:21:00	1.32701		2008-07-02	25.9		2014-12-20 14:49:00	2.13488
2015-02-12 08:31:00	1.33193		2008-07-03	24.7		2014-12-20 14:59:00	2.15272
2015-02-12 08:41:00	1.47793		2008-07-04	25.2		2014-12-20 15:09:00	2.15758
2015-02-12 08:51:00	1.7575		2008-07-05	24.3		2014-12-20 15:19:00	2.16731
2015-02-12 09:01:00	1.7526		2008-07-06	23.9		2014-12-20 15:29:00	2.1592
2015-02-12 09:11:00	1.76892		2008-07-07	24.9		2014-12-20 15:39:00	2.12028
2015-02-12 09:21:00	1.59579		2008-07-08	26.9		2014-12-20 15:49:00	2.07809
2015-02-12 09:31:00	1.74608		2008-07-09	23.4		2014-12-20 15:59:00	2.07322
2015-02-12 09:41:00	1.61705		2008-07-10	22.5		2014-12-20 16:09:00	2.05535
2015-02-12 09:51:00	1.7575		2008-07-11	24.4		2014-12-20 16:19:00	2.04074
2015-02-12 10:01:00	1.76565		2008-07-12	26		2014-12-20 16:29:00	2.01962
2015-02-12 10:11:00	1.90416		2008-07-13	27.2		2014-12-20 16:39:00	1.98061
2015-02-12 10:21:00	2.06835		2008-07-14	26.3		2014-12-20 16:49:00	1.98386
2015-02-12 10:31:00	2.15596		2008-07-15	22.2		2014-12-20 16:59:00	1.97736
2015-02-12 10:41:00	2.04561		2008-07-16	21.6		2014-12-20 17:09:00	1.9611
2015-02-12 10:51:00	2.17542		2008-07-17	24.7		2014-12-20 17:19:00	1.92206
2015-02-12 11:01:00	2.18514		2008-07-18	25.2		2014-12-20 17:29:00	1.90416
2015-02-12 11:11:00	2.24508		2008-07-19	24.9		2014-12-20 17:39:00	1.86508
2015-02-12 11:21:00	2.3648		2008-07-20	25.5		2014-12-20 17:49:00	1.83902
2015-02-12 11:31:00	2.56977		2008-07-21	27		2014-12-20 17:59:00	1.79338
2015-02-12 11:41:00	2.70339		2008-07-22	17.4		2014-12-20 18:09:00	1.72323
2015-02-12 11:51:00	2.73876		2008-07-23	16.7		2014-12-20 18:19:00	1.69874
2015-02-12 12:01:00	2.95223		2008-07-24	17.6		2014-12-20 18:29:00	1.64647
2015-02-12 12:11:00	3.1187		2008-07-25	18.1		2014-12-20 18:39:00	1.60233
2015-02-12 12:21:00	3.41226		2008-07-26	19.7		2014-12-20 18:49:00	1.54998
2015-02-12 12:31:00	3.53634		2008-07-27	23		2014-12-20 18:59:00	1.49922
2015-02-12 12:41:00	3.65069		2008-07-28	23.1		2014-12-20 19:09:00	1.45171
2015-02-12 12:51:00	3.8915		2008-07-29	24		2014-12-20 19:19:00	1.39431
2015-02-12 13:01:00	4.11262		2008-07-30	24.4		2014-12-20 19:29:00	1.33522
2015-02-12 13:11:00	4.43366		2008-07-31	24.6		2014-12-20 19:39:00	1.28264
2015-02-12 13:21:00	4.52469		2008-08-01	25.2		2014-12-20 19:49:00	1.24319
2015-02-12 13:31:00	4.74398		2008-08-02	26.1		2014-12-20 19:59:00	1.21851
2015-02-12 13:41:00	4.7737		2008-08-03	25.6		2014-12-20 20:09:00	1.19547
2015-02-12 13:51:00	4.85809		2008-08-04	26.3		2014-12-20 20:19:00	1.18395
2015-02-12 14:01:00	5.04842		2008-08-05	26.5		2014-12-20 20:29:00	1.15267
2015-02-12 14:11:00	5.31755		2008-08-06	26.2		2014-12-20 20:39:00	1.11148
2015-02-12 14:21:00	5.29736		2008-08-07	24.4		2014-12-20 20:49:00	1.08181
2015-02-12 14:31:00	5.45566		2008-08-08	25.9		2014-12-20 20:59:00	1.03397
2015-02-12 14:41:00	5.47427		2008-08-09	22.7		2014-12-20 21:09:00	0.99931
2015-02-12 14:51:00	5.53935		2008-08-10	23.1		2014-12-20 21:19:00	0.95141
2015-02-12 15:01:00	5.72966		2008-08-11	23.1		2014-12-20 21:29:00	0.94315
2015-02-12 15:11:00	6.01664		2008-08-12	25.4		2014-12-20 21:39:00	0.9828
2015-02-12 15:21:00	6.18284		2008-08-13	27.2		2014-12-20 21:49:00	0.99435
2015-02-12 15:31:00	6.22895		2008-08-14	28.4		2014-12-20 21:59:00	1.00921
2015-02-12 15:41:00	6.14901		2008-08-15	28.9		2014-12-20 22:09:00	1.02737
2015-02-12 15:51:00	6.03204		2008-08-16	29.1		2014-12-20 22:19:00	1.06861
2015-02-12 16:01:00	6.07824		2008-08-17	25.3		2014-12-20 22:29:00	1.03727
2015-02-12 16:11:00	5.98583		2008-08-18	24.5		2014-12-20 22:39:00	1.02242
2015-02-12 16:21:00	5.98891		2008-08-19	23		2014-12-20 22:49:00	1.00921
2015-02-12 16:31:00	5.89795		2008-08-20	25.7		2014-12-20 22:59:00	1.04387
2015-02-12 16:41:00	5.84395		2008-08-21	27		2014-12-20 23:09:00	1.04387
2015-02-12 16:51:00	5.72502		2008-08-22	27.3		2014-12-20 23:19:00	1.05542
2015-02-12 17:01:00	5.5889		2008-08-23	28.6		2014-12-20 23:29:00	1.07851
2015-02-12 17:11:00	5.5889		2008-08-24	25.2		2014-12-20 23:39:00	1.06037
2015-02-12 17:21:00	5.44171		2008-08-25	22.9		2014-12-20 23:49:00	1.03562
2015-02-12 17:31:00	5.35016		2008-08-26	23.2		2014-12-20 23:59:00	1.00921
2015-02-12 17:41:00	5.36103		2008-08-27	23.7		2014-12-21 00:09:00	1.03727
2015-02-12 17:51:00	5.2523		2008-08-28	23.9		2014-12-21 00:19:00	1.01417
2015-02-12 18:01:00	5.14653		2008-08-29	22.7		2014-12-21 00:29:00	0.97123
2015-02-12 18:11:00	5.13875		2008-08-30	22		2014-12-21 00:39:00	0.9861
2015-02-12 18:21:00	5.34395		2008-08-31	19.7		2014-12-21 00:49:00	0.97619
2015-02-12 18:31:00	5.15742		2008-09-01	20.7		2014-12-21 00:59:00	0.96628
2015-02-12 18:41:00	5.00946		2008-09-02	21.6		2014-12-21 01:09:00	0.96628
2015-02-12 18:51:00	4.95175		2008-09-03	22.8		2014-12-21 01:19:00	0.97454
2015-02-12 19:01:00	4.93303		2008-09-04	24.3		2014-12-21 01:29:00	0.9927
2015-02-12 19:11:00	4.86121		2008-09-05	24.5		2014-12-21 01:39:00	1.00591
2015-02-12 19:21:00	4.75962		2008-09-06	25.4		2014-12-21 01:49:00	1.01747
2015-02-12 19:31:00	4.77683		2008-09-07	25.6		2014-12-21 01:59:00	1.04057
2015-02-12 19:41:00	4.64381		2008-09-08	26.3		2014-12-21 02:09:00	1.05707
2015-02-12 19:51:00	4.56233		2008-09-09	23.7		2014-12-21 02:19:00	1.05707
2015-02-12 20:01:00	4.54822		2008-09-10	22.9		2014-12-21 02:29:00	1.04222
2015-02-12 20:11:00	4.41167		2008-09-11	22		2014-12-21 02:39:00	1.03562
2015-02-12 20:21:00	4.41795		2008-09-12	22.6		2014-12-21 02:49:00	1.02902
2015-02-12 20:31:00	4.32837		2008-09-13	18.5		2014-12-21 02:59:00	1.05542
2015-02-12 20:41:00	4.18985		2008-09-14	11.5		2014-12-21 03:09:00	1.0884
2015-02-12 20:51:00	4.05266		2008-09-15	11		2014-12-21 03:19:00	1.10983
2015-02-12 21:01:00	4.04635		2008-09-16	14.2		2014-12-21 03:29:00	1.14937
2015-02-12 21:11:00	4.01162		2008-09-17	13.9		2014-12-21 03:39:00	1.19054
2015-02-12 21:21:00	4.01635		2008-09-18	12.6		2014-12-21 03:49:00	1.23332
2015-02-12 21:31:00	3.90732		2008-09-19	13.3		2014-12-21 03:59:00	1.27771
2015-02-12 21:41:00	3.9974		2008-09-20	13.3		2014-12-21 04:09:00	1.29579
2015-02-12 21:51:00	3.88992		2008-09-21	13.2		2014-12-21 04:19:00	1.31222
2015-02-12 22:01:00	3.88201		2008-09-22	11.6		2014-12-21 04:29:00	1.32044
2015-02-12 22:11:00	3.58559		2008-09-23	13.5		2014-12-21 04:39:00	1.32044
2015-02-12 22:21:00	3.66021		2008-09-24	15		2014-12-21 04:49:00	1.34343
2015-02-12 22:31:00	3.60624		2008-09-25	11.8		2014-12-21 04:59:00	1.37626
2015-02-12 22:41:00	3.50454		2008-09-26	11.7		2014-12-21 05:09:00	1.42055
2015-02-12 22:51:00	3.495		2008-09-27	11.3		2014-12-21 05:19:00	1.43039
2015-02-12 23:01:00	3.43773		2008-09-28	11.6		2014-12-21 05:29:00	1.33193
2015-02-12 23:11:00	3.34376		2008-09-29	13.4		2014-12-21 05:39:00	1.22016
2015-02-12 23:21:00	3.26722		2008-09-30	12.4		2014-12-21 05:49:00	1.14773
2015-02-12 23:31:00	3.28477		2008-10-01	13.4		2014-12-21 05:59:00	1.09335
2015-02-12 23:41:00	3.21615		2008-10-02	13.9		2014-12-21 06:09:00	1.00096
2015-02-12 23:51:00	3.38996		2008-10-03	16.5		2014-12-21 06:19:00	0.95471
2015-02-13 00:01:00	3.28637		2008-10-04	17		2014-12-21 06:29:00	0.92662
2015-02-13 00:11:00	3.29912		2008-10-05	10.9		2014-12-21 06:39:00	0.90678
2015-02-13 00:21:00	3.20178		2008-10-06	12.2		2014-12-21 06:49:00	0.8555
2015-02-13 00:31:00	3.1155		2008-10-07	16.1		2014-12-21 06:59:00	0.83067
2015-02-13 00:41:00	3.1139		2008-10-08	16.1		2014-12-21 07:09:00	0.81411
2015-02-13 00:51:00	3.1906		2008-10-09	15		2014-12-21 07:19:00	0.79092
2015-02-13 01:01:00	2.92659		2008-10-10	15.1		2014-12-21 07:29:00	0.8108
2015-02-13 01:11:00	2.59877		2008-10-11	15.7		2014-12-21 07:39:00	0.88197
2015-02-13 01:21:00	2.48269		2008-10-12	14.8		2014-12-21 07:49:00	0.94315
2015-02-13 01:31:00	2.6036		2008-10-13	14.4		2014-12-21 07:59:00	1.00591
2015-02-13 01:41:00	2.49883		2008-10-14	14.8		2014-12-21 08:09:00	1.01747
2015-02-13 01:51:00	2.62776		2008-10-15	15.7		2014-12-21 08:19:00	0.98445
2015-02-13 02:01:00	2.64708		2008-10-16	15.2		2014-12-21 08:29:00	0.97619
2015-02-13 02:11:00	2.4488		2008-10-17	14.7		2014-12-21 08:39:00	0.94645
2015-02-13 02:21:00	2.3745		2008-10-18	11.9		2014-12-21 08:49:00	0.92497
2015-02-13 02:31:00	2.72912		2008-10-19	10.4		2014-12-21 08:59:00	0.86874
2015-02-13 02:41:00	2.41327		2008-10-20	12.4		2014-12-21 09:09:00	0.85715
2015-02-13 02:51:00	2.60038		2008-10-21	12.4		2014-12-21 09:19:00	0.81245
2015-02-13 03:01:00	2.58427		2008-10-22	12.4		2014-12-21 09:29:00	0.81577
2015-02-13 03:11:00	2.64547		2008-10-23	11.8		2014-12-21 09:39:00	0.77767
2015-02-13 03:21:00	2.55849		2008-10-24	10.6		2014-12-21 09:49:00	0.76772
2015-02-13 03:31:00	1.88136		2008-10-25	10.8		2014-12-21 09:59:00	0.73954
2015-02-13 03:41:00	2.10081		2008-10-26	9.2		2014-12-21 10:09:00	0.70969
2015-02-13 03:51:00	2.02937		2008-10-27	8.7		2014-12-21 10:19:00	0.65326
2015-02-13 04:01:00	2.09756		2008-10-28	10.9		2014-12-21 10:29:00	0.6765
2015-02-13 04:11:00	1.80316		2008-10-29	11.3		2014-12-21 10:39:00	0.70139
2015-02-13 04:21:00	1.8439		2008-10-30	12.3		2014-12-21 10:49:00	0.7213
2015-02-13 04:31:00	1.7575		2008-10-31	12.5		2014-12-21 10:59:00	0.6848
2015-02-13 04:41:00	2.07809		2008-11-01	14.5		2014-12-21 11:09:00	0.66322
2015-02-13 04:51:00	2.02287		2008-11-02	16.3		2014-12-21 11:19:00	0.6682
2015-02-13 05:01:00	1.97248		2008-11-03	13.1		2014-12-21 11:29:00	0.62669
2015-02-13 05:11:00	2.0862		2008-11-04	14.6		2014-12-21 11:39:00	0.6217
2015-02-13 05:21:00	2.17542		2008-11-05	14.7		2014-12-21 11:49:00	0.58182
2015-02-13 05:31:00	1.98711		2008-11-06	13		2014-12-21 11:59:00	0.59179
2015-02-13 05:41:00	2.01474		2008-11-07	12.1		2014-12-21 12:09:00	0.63001
2015-02-13 05:51:00	2.23213		2008-11-08	10.7		2014-12-21 12:19:00	0.55022
2015-02-13 06:01:00	2.25642		2008-11-09	9.9		2014-12-21 12:29:00	0.58847
2015-02-13 06:11:00	2.05373		2008-11-10	8.7		2014-12-21 12:39:00	0.59678
2015-02-13 06:21:00	2.10568		2008-11-11	6.2		2014-12-21 12:49:00	0.51529
2015-02-13 06:31:00	1.83902		2008-11-12	5.6		2014-12-21 12:59:00	0.51695
2015-02-13 06:41:00	1.96273		2008-11-13	4.8		2014-12-21 13:09:00	0.55189
2015-02-13 06:51:00	1.92206		2008-11-14	3.5		2014-12-21 13:19:00	0.53525
2015-02-13 07:01:00	1.92043		2008-11-15	5.7		2014-12-21 13:29:00	0.57351
2015-02-13 07:11:00	2.04723		2008-11-16	5.4		2014-12-21 13:39:00	0.5469
2015-02-13 07:21:00	2.03749		2008-11-17	8.2		2014-12-21 13:49:00	0.52527
2015-02-13 07:31:00	1.61051		2008-11-18	5.5		2014-12-21 13:59:00	0.43868
2015-02-13 07:41:00	1.80968		2008-11-19	5.7		2014-12-21 14:09:00	0.39034
2015-02-13 07:51:00	1.6056		2008-11-20	8.2		2014-12-21 14:19:00	0.40868
2015-02-13 08:01:00	1.74771		2008-11-21	7.9		2014-12-21 14:29:00	0.33361
2015-02-13 08:11:00	2.07159		2008-11-22	5.2		2014-12-21 14:39:00	0.34696
2015-02-13 08:21:00	2.03586		2008-11-23	0.8		2014-12-21 14:49:00	0.36532
2015-02-13 08:31:00	1.8439		2008-11-24	-1.3		2014-12-21 14:59:00	0.36365
2015-02-13 08:41:00	1.64157		2008-11-25	5.7		2014-12-21 15:09:00	0.2952
2015-02-13 08:51:00	1.74118		2008-11-26	5		2014-12-21 15:19:00	0.31858
2015-02-13 09:01:00	1.99362		2008-11-27	2.6		2014-12-21 15:29:00	0.31357
2015-02-13 09:11:00	1.82598		2008-11-28	0.9		2014-12-21 15:39:00	0.27014
2015-02-13 09:21:00	1.94158		2008-11-29	3.9		2014-12-21 15:49:00	0.29186
2015-02-13 09:31:00	2.12028		2008-11-30	3.9		2014-12-21 15:59:00	0.21497
2015-02-13 09:41:00	2.41327		2008-12-01	4		2014-12-21 16:09:00	0.24005
2015-02-13 09:51:00	2.33247		2008-12-02	4.4		2014-12-21 16:19:00	0.24674
2015-02-13 10:01:00	2.15434		2008-12-03	6.1		2014-12-21 16:29:00	0.23671
2015-02-13 10:11:00	2.26775		2008-12-04	7.4		2014-12-21 16:39:00	0.225
2015-02-13 10:21:00	2.1819		2008-12-05	8.6		2014-12-21 16:49:00	0.16979
2015-02-13 10:31:00	2.03424		2008-12-06	8.8		2014-12-21 16:59:00	0.18151
2015-02-13 10:41:00	2.04399		2008-12-07	6.1		2014-12-21 17:09:00	0.19155
2015-02-13 10:51:00	2.39389		2008-12-08	6.4		2014-12-21 17:19:00	0.15472
2015-02-13 11:01:00	2.39874		2008-12-09	4		2014-12-21 17:29:00	0.19824
2015-02-13 11:11:00	2.47301		2008-12-10	0.9		2014-12-21 17:39:00	0.17146
2015-02-13 11:21:00	2.48753		2008-12-11	1.8		2014-12-21 17:49:00	0.2066
2015-02-13 11:31:00	2.70339		2008-12-12	7.7		2014-12-21 17:59:00	0.18987
2015-02-13 11:41:00	2.78055		2008-12-13	5.4		2014-12-21 18:09:00	0.17314
2015-02-13 11:51:00	3.0179		2008-12-14	2.4		2014-12-21 18:19:00	0.18653
2015-02-13 12:01:00	3.15386		2008-12-15	4.5		2014-12-21 18:29:00	0.1882
2015-02-13 12:11:00	3.23371		2008-12-16	4.6		2014-12-21 18:39:00	0.13128
2015-02-13 12:21:00	3.51885		2008-12-17	5.6		2014-12-21 18:49:00	0.11787
2015-02-13 12:31:00	3.86777		2008-12-18	8		2014-12-21 18:59:00	0.14133
2015-02-13 12:41:00	3.92471		2008-12-19	5.7		2014-12-21 19:09:00	0.18485
2015-02-13 12:51:00	4.10631		2008-12-20	4.8		2014-12-21 19:19:00	0.17314
2015-02-13 13:01:00	4.29848		2008-12-21	5.4		2014-12-21 19:29:00	0.20493
2015-02-13 13:11:00	4.55449		2008-12-22	5		2014-12-21 19:39:00	0.18485
2015-02-13 13:21:00	4.82372		2008-12-23	5.2		2014-12-21 19:49:00	0.16142
2015-02-13 13:31:00	5.08893		2008-12-24	2.3		2014-12-21 19:59:00	0.13798
2015-02-13 13:41:00	5.38431		2008-12-25	-0.9		2014-12-21 20:09:00	0.1162
2015-02-13 13:51:00	5.76056		2008-12-26	-4.9		2014-12-21 20:19:00	0.08436
2015-02-13 14:01:00	5.87481		2008-12-27	-4.6		2014-12-21 20:29:00	0.05417
2015-02-13 14:11:00	6.02742		2008-12-28	-3.6		2014-12-21 20:39:00	0.06591
2015-02-13 14:21:00	6.15978		2008-12-29	-6.3		2014-12-21 20:49:00	0.06759
2015-02-13 14:31:00	6.41009		2008-12-30	-6.8		2014-12-21 20:59:00	0.04747
2015-02-13 14:41:00	6.54341		2008-12-31	-7		2014-12-21 21:09:00	0.02733
2015-02-13 14:51:00	6.67501		2009-01-01	-6.3		2014-12-21 21:19:00	0.05921
2015-02-13 15:01:00	6.72545		2009-01-02	-2.8		2014-12-21 21:29:00	0.00887
2015-02-13 15:11:00	6.73768		2009-01-03	-4.4		2014-12-21 21:39:00	-0.03143
2015-02-13 15:21:00	6.82321		2009-01-04	-5.2		2014-12-21 21:49:00	-0.03983
2015-02-13 15:31:00	6.79878		2009-01-05	-7.2		2014-12-21 21:59:00	-0.05999
2015-02-13 15:41:00	6.85069		2009-01-06	-6.6		2014-12-21 22:09:00	-0.09529
2015-02-13 15:51:00	6.90104		2009-01-07	-2.3		2014-12-21 22:19:00	-0.11547
2015-02-13 16:01:00	6.95746		2009-01-08	-3.1		2014-12-21 22:29:00	-0.16764
2015-02-13 16:11:00	6.88273		2009-01-09	-4.9		2014-12-21 22:39:00	-0.16596
2015-02-13 16:21:00	6.89951		2009-01-10	-6.4		2014-12-21 22:49:00	-0.17606
2015-02-13 16:31:00	6.84458		2009-01-11	-6.3		2014-12-21 22:59:00	-0.17943
2015-02-13 16:41:00	6.811		2009-01-12	-6.6		2014-12-21 23:09:00	-0.14744
2015-02-13 16:51:00	6.64289		2009-01-13	-5.9		2014-12-21 23:19:00	-0.09193
2015-02-13 17:01:00	6.52963		2009-01-14	-0.7		2014-12-21 23:29:00	-0.06503
2015-02-13 17:11:00	6.46222		2009-01-15	1.1		2014-12-21 23:39:00	-0.06839
2015-02-13 17:21:00	6.32725		2009-01-16	3		2014-12-21 23:49:00	-0.06839
2015-02-13 17:31:00	6.2689		2009-01-17	2.2		2014-12-21 23:59:00	-0.07512
2015-02-13 17:41:00	5.9997		2009-01-18	3		2014-12-22 00:09:00	-0.08688
2015-02-13 17:51:00	5.94113		2009-01-19	4.3		2014-12-22 00:19:00	-0.11884
2015-02-13 18:01:00	5.81771		2009-01-20	4.5		2014-12-22 00:29:00	-0.1222
2015-02-13 18:11:00	5.80227		2009-01-21	2.3		2014-12-22 00:39:00	-0.18616
2015-02-13 18:21:00	5.66163		2009-01-22	4.3		2014-12-22 00:49:00	-0.14744
2015-02-13 18:31:00	5.43395		2009-01-23	6.8		2014-12-22 00:59:00	-0.22997
2015-02-13 18:41:00	5.48822		2009-01-24	5.2		2014-12-22 01:09:00	-0.19122
2015-02-13 18:51:00	5.37345		2009-01-25	6.8		2014-12-22 01:19:00	-0.25526
2015-02-13 19:01:00	5.41224		2009-01-26	7.2		2014-12-22 01:29:00	-0.30924
2015-02-13 19:11:00	5.44636		2009-01-27	5.1		2014-12-22 01:39:00	-0.32106
2015-02-13 19:21:00	5.28648		2009-01-28	6.2		2014-12-22 01:49:00	-0.27381
2015-02-13 19:31:00	5.2383		2009-01-29	3.7		2014-12-22 01:59:00	-0.30755
2015-02-13 19:41:00	5.00166		2009-01-30	1.8		2014-12-22 02:09:00	-0.26369
2015-02-13 19:51:00	5.1154		2009-01-31	2		2014-12-22 02:19:00	-0.32443
2015-02-13 20:01:00	5.20565		2009-02-01	1.3		2014-12-22 02:29:00	-0.31093
2015-02-13 20:11:00	5.17765		2009-02-02	1.8		2014-12-22 02:39:00	-0.31937
2015-02-13 20:21:00	5.15898		2009-02-03	2.2		2014-12-22 02:49:00	-0.31937
2015-02-13 20:31:00	5.19787		2009-02-04	5.2		2014-12-22 02:59:00	-0.38186
2015-02-13 20:41:00	5.0453		2009-02-05	6.5		2014-12-22 03:09:00	-0.35145
2015-02-13 20:51:00	4.99074		2009-02-06	6.8		2014-12-22 03:19:00	-0.41905
2015-02-13 21:01:00	5.03595		2009-02-07	7		2014-12-22 03:29:00	-0.46811
2015-02-13 21:11:00	5.07023		2009-02-08	9.1		2014-12-22 03:39:00	-0.4952
2015-02-13 21:21:00	4.90025		2009-02-09	4.8		2014-12-22 03:49:00	-0.45796
2015-02-13 21:31:00	4.8534		2009-02-10	5.6		2014-12-22 03:59:00	-0.56127
2015-02-13 21:41:00	4.87683		2009-02-11	5.1		2014-12-22 04:09:00	-0.4952
2015-02-13 21:51:00	4.89869		2009-02-12	2.3		2014-12-22 04:19:00	-0.45119
2015-02-13 22:01:00	4.80809		2009-02-13	1.5		2014-12-22 04:29:00	-0.53585
2015-02-13 22:11:00	4.67513		2009-02-14	1		2014-12-22 04:39:00	-0.44273
2015-02-13 22:21:00	4.78777		2009-02-15	1.5		2014-12-22 04:49:00	-0.44273
2015-02-13 22:31:00	4.68609		2009-02-16	0.6		2014-12-22 04:59:00	-0.40721
2015-02-13 22:41:00	4.61875		2009-02-17	-1.7		2014-12-22 05:09:00	-0.38524
2015-02-13 22:51:00	4.62502		2009-02-18	0.1		2014-12-22 05:19:00	-0.40891
2015-02-13 23:01:00	4.51842		2009-02-19	1.4		2014-12-22 05:29:00	-0.40214
2015-02-13 23:11:00	4.48233		2009-02-20	0.1		2014-12-22 05:39:00	-0.392
2015-02-13 23:21:00	4.38496		2009-02-21	0.8		2014-12-22 05:49:00	-0.44611
2015-02-13 23:31:00	4.41952		2009-02-22	-0.6		2014-12-22 05:59:00	-0.54432
2015-02-13 23:41:00	4.24025		2009-02-23	-0.9		2014-12-22 06:09:00	-0.48673
2015-02-13 23:51:00	4.24025		2009-02-24	-2.6		2014-12-22 06:19:00	-0.46473
2015-02-14 00:01:00	4.11735		2009-02-25	-0.6		2014-12-22 06:29:00	-0.42412
2015-02-14 00:11:00	3.95158		2009-02-26	-0.3		2014-12-22 06:39:00	-0.54263
2015-02-14 00:21:00	3.81712		2009-02-27	4.7		2014-12-22 06:49:00	-0.46811
2015-02-14 00:31:00	3.69035		2009-02-28	4.3		2014-12-22 06:59:00	-0.42751
2015-02-14 00:41:00	3.68559		2009-03-01	7.3		2014-12-22 07:09:00	-0.41229
2015-02-14 00:51:00	3.82662		2009-03-02	5		2014-12-22 07:19:00	-0.41229
2015-02-14 01:01:00	3.50613		2009-03-03	4.1		2014-12-22 07:29:00	-0.40214
2015-02-14 01:11:00	3.64116		2009-03-04	4.8		2014-12-22 07:39:00	-0.31093
2015-02-14 01:21:00	3.45046		2009-03-05	7.1		2014-12-22 07:49:00	-0.25526
2015-02-14 01:31:00	3.61735		2009-03-06	10		2014-12-22 07:59:00	-0.23503
2015-02-14 01:41:00	3.61735		2009-03-07	8.7		2014-12-22 08:09:00	-0.20806
2015-02-14 01:51:00	3.54905		2009-03-08	6.9		2014-12-22 08:19:00	-0.19122
2015-02-14 02:01:00	3.69511		2009-03-09	9		2014-12-22 08:29:00	-0.17606
2015-02-14 02:11:00	3.72523		2009-03-10	7		2014-12-22 08:39:00	-0.20469
2015-02-14 02:21:00	3.684		2009-03-11	4.5		2014-12-22 08:49:00	-0.20638
2015-02-14 02:31:00	3.58242		2009-03-12	6.2		2014-12-22 08:59:00	-0.20806
2015-02-14 02:41:00	3.72365		2009-03-13	4.5		2014-12-22 09:09:00	-0.17438
2015-02-14 02:51:00	3.47273		2009-03-14	6.1		2014-12-22 09:19:00	-0.18616
2015-02-14 03:01:00	3.57606		2009-03-15	5.5		2014-12-22 09:29:00	-0.18111
2015-02-14 03:11:00	3.18422		2009-03-16	7.3		2014-12-22 09:39:00	-0.19459
2015-02-14 03:21:00	3.06912		2009-03-17	6.5		2014-12-22 09:49:00	-0.21649
2015-02-14 03:31:00	3.19699		2009-03-18	5.7		2014-12-22 09:59:00	-0.20301
2015-02-14 03:41:00	3.07232		2009-03-19	4.9		2014-12-22 10:09:00	-0.17774
2015-02-14 03:51:00	3.1906		2009-03-20	4.1		2014-12-22 10:19:00	-0.14912
2015-02-14 04:01:00	3.3071		2009-03-21	3.3		2014-12-22 10:29:00	-0.11547
2015-02-14 04:11:00	3.34217		2009-03-22	7.2		2014-12-22 10:39:00	-0.0852
2015-02-14 04:21:00	3.29434		2009-03-23	8.4		2014-12-22 10:49:00	-0.04487
2015-02-14 04:31:00	3.2385		2009-03-24	7.1		2014-12-22 10:59:00	-0.05999
2015-02-14 04:41:00	3.48705		2009-03-25	5		2014-12-22 11:09:00	-0.05495
2015-02-14 04:51:00	3.37244		2009-03-26	3.5		2014-12-22 11:19:00	-0.05831
2015-02-14 05:01:00	3.40748		2009-03-27	6.7		2014-12-22 11:29:00	-0.02807
2015-02-14 05:11:00	3.382		2009-03-28	9.5		2014-12-22 11:39:00	-0.02471
2015-02-14 05:21:00	3.22414		2009-03-29	12.1		2014-12-22 11:49:00	-0.01799
2015-02-14 05:31:00	3.59989		2009-03-30	14.4		2014-12-22 11:59:00	0.03069
2015-02-14 05:41:00	3.22094		2009-03-31	14.7		2014-12-22 12:09:00	0.0374
2015-02-14 05:51:00	3.48069		2009-04-01	12.8		2014-12-22 12:19:00	0.04411
2015-02-14 06:01:00	3.62212		2009-04-02	11.7		2014-12-22 12:29:00	0.0525
2015-02-14 06:11:00	3.36607		2009-04-03	14.3		2014-12-22 12:39:00	0.07597
2015-02-14 06:21:00	3.46796		2009-04-04	12		2014-12-22 12:49:00	0.08436
2015-02-14 06:31:00	3.30072		2009-04-05	13.7		2014-12-22 12:59:00	0.11117
2015-02-14 06:41:00	3.36129		2009-04-06	14.4		2014-12-22 13:09:00	0.11955
2015-02-14 06:51:00	3.38996		2009-04-07	13.1		2014-12-22 13:19:00	0.15305
2015-02-14 07:01:00	3.20498		2009-04-08	13.5		2014-12-22 13:29:00	0.16309
2015-02-14 07:11:00	3.01951		2009-04-09	14.6		2014-12-22 13:39:00	0.16309
2015-02-14 07:21:00	2.88329		2009-04-10	14.1		2014-12-22 13:49:00	0.18318
2015-02-14 07:31:00	3.17463		2009-04-11	13.7		2014-12-22 13:59:00	0.21162
2015-02-14 07:41:00	3.08832		2009-04-12	13.9		2014-12-22 14:09:00	0.24841
2015-02-14 07:51:00	3.28637		2009-04-13	10.3		2014-12-22 14:19:00	0.30355
2015-02-14 08:01:00	3.28956		2009-04-14	9.9		2014-12-22 14:29:00	0.3503
2015-02-14 08:11:00	3.10751		2009-04-15	13.5		2014-12-22 14:39:00	0.387
2015-02-14 08:21:00	3.49023		2009-04-16	15		2014-12-22 14:49:00	0.43868
2015-02-14 08:31:00	3.32463		2009-04-17	15.5		2014-12-22 14:59:00	0.47367
2015-02-14 08:41:00	3.57447		2009-04-18	16.3		2014-12-22 15:09:00	0.47367
2015-02-14 08:51:00	3.42658		2009-04-19	14.7		2014-12-22 15:19:00	0.472
2015-02-14 09:01:00	3.68718		2009-04-20	16.1		2014-12-22 15:29:00	0.5286
2015-02-14 09:11:00	3.68876		2009-04-21	15.9		2014-12-22 15:39:00	0.56852
2015-02-14 09:21:00	3.75693		2009-04-22	13		2014-12-22 15:49:00	0.57849
2015-02-14 09:31:00	3.92629		2009-04-23	11.1		2014-12-22 15:59:00	0.58514
2015-02-14 09:41:00	3.95949		2009-04-24	11.8		2014-12-22 16:09:00	0.62669
2015-02-14 09:51:00	3.68718		2009-04-25	12		2014-12-22 16:19:00	0.61838
2015-02-14 10:01:00	3.63481		2009-04-26	10.2		2014-12-22 16:29:00	0.60841
2015-02-14 10:11:00	3.41863		2009-04-27	12.3		2014-12-22 16:39:00	0.60509
2015-02-14 10:21:00	3.16824		2009-04-28	15		2014-12-22 16:49:00	0.59512
2015-02-14 10:31:00	3.21456		2009-04-29	16.6		2014-12-22 16:59:00	0.59345
2015-02-14 10:41:00	3.35014		2009-04-30	15.7		2014-12-22 17:09:00	0.63167
2015-02-14 10:51:00	3.20019		2009-05-01	15.6		2014-12-22 17:19:00	0.63499
2015-02-14 11:01:00	3.2385		2009-05-02	14.5		2014-12-22 17:29:00	0.63665
2015-02-14 11:11:00	3.22254		2009-05-03	14.1		2014-12-22 17:39:00	0.64994
2015-02-14 11:21:00	3.38837		2009-05-04	16.1		2014-12-22 17:49:00	0.65824
2015-02-14 11:31:00	3.46637		2009-05-05	14.7		2014-12-22 17:59:00	0.64828
2015-02-14 11:41:00	3.55382		2009-05-06	15.5		2014-12-22 18:09:00	0.6682
2015-02-14 11:51:00	3.73316		2009-05-07	16		2014-12-22 18:19:00	0.65326
2015-02-14 12:01:00	3.8915		2009-05-08	16.5		2014-12-22 18:29:00	0.67318
2015-02-14 12:11:00	3.99108		2009-05-09	19		2014-12-22 18:39:00	0.67816
2015-02-14 12:21:00	4.19931		2009-05-10	19.8		2014-12-22 18:49:00	0.68812
2015-02-14 12:31:00	4.42266		2009-05-11	21.2		2014-12-22 18:59:00	0.70803
2015-02-14 12:41:00	4.54351		2009-05-12	21.2		2014-12-22 19:09:00	0.74617
2015-02-14 12:51:00	4.72678		2009-05-13	15.4		2014-12-22 19:19:00	0.72628
2015-02-14 13:01:00	5.03907		2009-05-14	15.7		2014-12-22 19:29:00	0.69476
2015-02-14 13:11:00	5.33308		2009-05-15	21.7		2014-12-22 19:39:00	0.70803
2015-02-14 13:21:00	5.64926		2009-05-16	21.7		2014-12-22 19:49:00	0.69973
2015-02-14 13:31:00	5.95192		2009-05-17	22.4		2014-12-22 19:59:00	0.65326
2015-02-14 13:41:00	6.252		2009-05-18	23.8		2014-12-22 20:09:00	0.65492
2015-02-14 13:51:00	6.40856		2009-05-19	23.4		2014-12-22 20:19:00	0.67484
2015-02-14 14:01:00	6.58628		2009-05-20	21.2		2014-12-22 20:29:00	0.6433
2015-02-14 14:11:00	6.67195		2009-05-21	21.6		2014-12-22 20:39:00	0.65658
2015-02-14 14:21:00	6.95136		2009-05-22	23.7		2014-12-22 20:49:00	0.64164
2015-02-14 14:31:00	7.03365		2009-05-23	22.5		2014-12-22 20:59:00	0.66488
2015-02-14 14:41:00	7.01537		2009-05-24	21.8		2014-12-22 21:09:00	0.65824
2015-02-14 14:51:00	7.11435		2009-05-25	22.6		2014-12-22 21:19:00	0.66322
2015-02-14 15:01:00	7.15847		2009-05-26	22.3		2014-12-22 21:29:00	0.68812
2015-02-14 15:11:00	7.18129		2009-05-27	22.6		2014-12-22 21:39:00	0.71964
2015-02-14 15:21:00	7.23147		2009-05-28	19.8		2014-12-22 21:49:00	0.75612
2015-02-14 15:31:00	7.29225		2009-05-29	16.4		2014-12-22 21:59:00	0.79258
2015-02-14 15:41:00	7.33326		2009-05-30	11.2		2014-12-22 22:09:00	0.80583
2015-02-14 15:51:00	7.40157		2009-05-31	15.1		2014-12-22 22:19:00	0.81245
2015-02-14 16:01:00	7.4046		2009-06-01	17.3		2014-12-22 22:29:00	0.79092
2015-02-14 16:11:00	7.3287		2009-06-02	15.5		2014-12-22 22:39:00	0.78098
2015-02-14 16:21:00	7.3287		2009-06-03	18.2		2014-12-22 22:49:00	0.77269
2015-02-14 16:31:00	7.34085		2009-06-04	18.6		2014-12-22 22:59:00	0.81411
2015-02-14 16:41:00	7.30288		2009-06-05	18.9		2014-12-22 23:09:00	0.8257
2015-02-14 16:51:00	7.23755		2009-06-06	21.7		2014-12-22 23:19:00	0.92331
2015-02-14 17:01:00	7.13413		2009-06-07	24.9		2014-12-22 23:29:00	0.9481
2015-02-14 17:11:00	7.02756		2009-06-08	25		2014-12-22 23:39:00	0.96958
2015-02-14 17:21:00	6.86137		2009-06-09	24.8		2014-12-22 23:49:00	0.98775
2015-02-14 17:31:00	6.73768		2009-06-10	26.5		2014-12-22 23:59:00	1.01417
2015-02-14 17:41:00	6.69336		2009-06-11	26.2		2014-12-23 00:09:00	1.10324
2015-02-14 17:51:00	6.62453		2009-06-12	21.8		2014-12-23 00:19:00	1.1362
2015-02-14 18:01:00	6.75143		2009-06-13	18.8		2014-12-23 00:29:00	1.11478
2015-02-14 18:11:00	6.68877		2009-06-14	20.1		2014-12-23 00:39:00	1.06861
2015-02-14 18:21:00	6.36868		2009-06-15	22.7		2014-12-23 00:49:00	1.07521
2015-02-14 18:31:00	6.30882		2009-06-16	25.3		2014-12-23 00:59:00	1.08346
2015-02-14 18:41:00	6.25661		2009-06-17	22.7		2014-12-23 01:09:00	1.11478
2015-02-14 18:51:00	5.94576		2009-06-18	22.6		2014-12-23 01:19:00	1.12137
2015-02-14 19:01:00	5.62295		2009-06-19	24.6		2014-12-23 01:29:00	1.14773
2015-02-14 19:11:00	5.28182		2009-06-20	26.3		2014-12-23 01:39:00	1.13125
2015-02-14 19:21:00	5.17143		2009-06-21	22.7		2014-12-23 01:49:00	1.11313
2015-02-14 19:31:00	5.0453		2009-06-22	19.7		2014-12-23 01:59:00	1.10159
2015-02-14 19:41:00	5.15431		2009-06-23	21		2014-12-23 02:09:00	1.10489
2015-02-14 19:51:00	5.23053		2009-06-24	18.7		2014-12-23 02:19:00	1.14278
2015-02-14 20:01:00	5.38121		2009-06-25	18.9		2014-12-23 02:29:00	1.18395
2015-02-14 20:11:00	5.38121		2009-06-26	20.1		2014-12-23 02:39:00	1.17572
2015-02-14 20:21:00	5.43861		2009-06-27	19.2		2014-12-23 02:49:00	1.16914
2015-02-14 20:31:00	5.44016		2009-06-28	21.2		2014-12-23 02:59:00	1.17243
2015-02-14 20:41:00	5.47582		2009-06-29	22.8		2014-12-23 03:09:00	1.14608
2015-02-14 20:51:00	5.4293		2009-06-30	21.6		2014-12-23 03:19:00	1.14114
2015-02-14 21:01:00	5.54864		2009-07-01	23.1		2014-12-23 03:29:00	1.15431
2015-02-14 21:11:00	5.26784		2009-07-02	22.4		2014-12-23 03:39:00	1.15926
2015-02-14 21:21:00	5.1263		2009-07-03	23.5		2014-12-23 03:49:00	1.18066
2015-02-14 21:31:00	5.1901		2009-07-04	24		2014-12-23 03:59:00	1.20699
2015-02-14 21:41:00	5.1901		2009-07-05	24.7		2014-12-23 04:09:00	1.24154
2015-02-14 21:51:00	5.15431		2009-07-06	25.3		2014-12-23 04:19:00	1.19547
2015-02-14 22:01:00	5.08269		2009-07-07	22.2		2014-12-23 04:29:00	1.20535
2015-02-14 22:11:00	5.07802		2009-07-08	23.9		2014-12-23 04:39:00	1.19712
2015-02-14 22:21:00	5.07179		2009-07-09	23.1		2014-12-23 04:49:00	1.18395
2015-02-14 22:31:00	4.91274		2009-07-10	23.3		2014-12-23 04:59:00	1.17737
2015-02-14 22:41:00	4.86277		2009-07-11	20.4		2014-12-23 05:09:00	1.18395
2015-02-14 22:51:00	4.83466		2009-07-12	19.3		2014-12-23 05:19:00	1.19054
2015-02-14 23:01:00	4.62502		2009-07-13	23		2014-12-23 05:29:00	1.1856
2015-02-14 23:11:00	4.71426		2009-07-14	25.3		2014-12-23 05:39:00	1.15926
2015-02-14 23:21:00	4.55292		2009-07-15	26.3		2014-12-23 05:49:00	1.14608
2015-02-14 23:31:00	4.38182		2009-07-16	27.9		2014-12-23 05:59:00	1.14773
2015-02-14 23:41:00	4.4525		2009-07-17	27.1		2014-12-23 06:09:00	1.16749
2015-02-14 23:51:00	4.42895		2009-07-18	27		2014-12-23 06:19:00	1.18724
2015-02-15 00:01:00	4.40381		2009-07-19	23.2		2014-12-23 06:29:00	1.15761
2015-02-15 00:11:00	4.25599		2009-07-20	23.9		2014-12-23 06:39:00	1.16255
2015-02-15 00:21:00	4.32365		2009-07-21	23.8		2014-12-23 06:49:00	1.17737
2015-02-15 00:31:00	4.31578		2009-07-22	25.5		2014-12-23 06:59:00	1.19547
2015-02-15 00:41:00	4.4101		2009-07-23	26.5		2014-12-23 07:09:00	1.23167
2015-02-15 00:51:00	4.08107		2009-07-24	28.7		2014-12-23 07:19:00	1.281
2015-02-15 01:01:00	4.05582		2009-07-25	27.9		2014-12-23 07:29:00	1.33029
2015-02-15 01:11:00	3.86302		2009-07-26	24.2		2014-12-23 07:39:00	1.31058
2015-02-15 01:21:00	3.84245		2009-07-27	23.1		2014-12-23 07:49:00	1.29086
2015-02-15 01:31:00	3.82504		2009-07-28	24.4		2014-12-23 07:59:00	1.30729
2015-02-15 01:41:00	3.63005		2009-07-29	25.1		2014-12-23 08:09:00	1.32044
2015-02-15 01:51:00	3.64434		2009-07-30	26.7		2014-12-23 08:19:00	1.31715
2015-02-15 02:01:00	3.43932		2009-07-31	26.6		2014-12-23 08:29:00	1.35164
2015-02-15 02:11:00	3.6237		2009-08-01	26.5		2014-12-23 08:39:00	1.34179
2015-02-15 02:21:00	3.70621		2009-08-02	26.4		2014-12-23 08:49:00	1.35328
2015-02-15 02:31:00	3.61577		2009-08-03	28.7		2014-12-23 08:59:00	1.34343
2015-02-15 02:41:00	3.73316		2009-08-04	27.9		2014-12-23 09:09:00	1.36477
2015-02-15 02:51:00	3.37244		2009-08-05	20.2		2014-12-23 09:19:00	1.43367
2015-02-15 03:01:00	3.5427		2009-08-06	22.5		2014-12-23 09:29:00	1.42875
2015-02-15 03:11:00	3.611		2009-08-07	21.9		2014-12-23 09:39:00	1.49595
2015-02-15 03:21:00	3.495		2009-08-08	23.3		2014-12-23 09:49:00	1.46154
2015-02-15 03:31:00	3.67766		2009-08-09	23.8		2014-12-23 09:59:00	1.57125
2015-02-15 03:41:00	3.57765		2009-08-10	22.1		2014-12-23 10:09:00	1.52379
2015-02-15 03:51:00	3.684		2009-08-11	23.6		2014-12-23 10:19:00	1.55653
2015-02-15 04:01:00	3.65545		2009-08-12	24		2014-12-23 10:29:00	1.6007
2015-02-15 04:11:00	3.68242		2009-08-13	24.3		2014-12-23 10:39:00	1.59579
2015-02-15 04:21:00	3.52521		2009-08-14	23.3		2014-12-23 10:49:00	1.62849
2015-02-15 04:31:00	3.70938		2009-08-15	24.6		2014-12-23 10:59:00	1.66608
2015-02-15 04:41:00	3.72999		2009-08-16	25		2014-12-23 11:09:00	1.75424
2015-02-15 04:51:00	3.69352		2009-08-17	25.5		2014-12-23 11:19:00	1.7265
2015-02-15 05:01:00	3.77753		2009-08-18	26.4		2014-12-23 11:29:00	1.73466
2015-02-15 05:11:00	3.87568		2009-08-19	26.5		2014-12-23 11:39:00	1.7265
2015-02-15 05:21:00	3.77278		2009-08-20	25.2		2014-12-23 11:49:00	1.76076
2015-02-15 05:31:00	3.67607		2009-08-21	25.1		2014-12-23 11:59:00	1.83087
2015-02-15 05:41:00	3.69035		2009-08-22	25.2		2014-12-23 12:09:00	1.90904
2015-02-15 05:51:00	3.50136		2009-08-23	25.4		2014-12-23 12:19:00	1.89764
2015-02-15 06:01:00	3.53475		2009-08-24	22.7		2014-12-23 12:29:00	1.83576
2015-02-15 06:11:00	3.84087		2009-08-25	24.2		2014-12-23 12:39:00	1.85205
2015-02-15 06:21:00	3.92787		2009-08-26	24.5		2014-12-23 12:49:00	1.87322
2015-02-15 06:31:00	4.1		2009-08-27	25.3		2014-12-23 12:59:00	1.85531
2015-02-15 06:41:00	4.04951		2009-08-28	23.6		2014-12-23 13:09:00	1.88136
2015-02-15 06:51:00	3.95474		2009-08-29	24.5		2014-12-23 13:19:00	1.91392
2015-02-15 07:01:00	3.92313		2009-08-30	23.4		2014-12-23 13:29:00	1.8895
2015-02-15 07:11:00	3.80604		2009-08-31	22.1		2014-12-23 13:39:00	1.92368
2015-02-15 07:21:00	3.56812		2009-09-01	22.2		2014-12-23 13:49:00	1.97248
2015-02-15 07:31:00	3.58083		2009-09-02	22.1		2014-12-23 13:59:00	1.94158
2015-02-15 07:41:00	3.66179		2009-09-03	23.9		2014-12-23 14:09:00	1.87974
2015-02-15 07:51:00	3.40111		2009-09-04	25.3		2014-12-23 14:19:00	1.87159
2015-02-15 08:01:00	3.42977		2009-09-05	22.3		2014-12-23 14:29:00	1.93995
2015-02-15 08:11:00	3.33739		2009-09-06	18.7		2014-12-23 14:39:00	2.02774
2015-02-15 08:21:00	3.28956		2009-09-07	17.7		2014-12-23 14:49:00	1.99849
2015-02-15 08:31:00	3.35651		2009-09-08	16.3		2014-12-23 14:59:00	1.97899
2015-02-15 08:41:00	3.33739		2009-09-09	19.5		2014-12-23 15:09:00	1.95297
2015-02-15 08:51:00	3.41066		2009-09-10	21.5		2014-12-23 15:19:00	2.03262
2015-02-15 09:01:00	3.57289		2009-09-11	23		2014-12-23 15:29:00	1.99687
2015-02-15 09:11:00	3.96107		2009-09-12	23.6		2014-12-23 15:39:00	1.97899
2015-02-15 09:21:00	3.85353		2009-09-13	20.4		2014-12-23 15:49:00	1.94971
2015-02-15 09:31:00	4.0574		2009-09-14	20.4		2014-12-23 15:59:00	1.94321
2015-02-15 09:41:00	4.3991		2009-09-15	21.9		2014-12-23 16:09:00	1.91392
2015-02-15 09:51:00	4.51528		2009-09-16	22.1		2014-12-23 16:19:00	1.93833
2015-02-15 10:01:00	4.50273		2009-09-17	20		2014-12-23 16:29:00	1.92531
2015-02-15 10:11:00	4.25757		2009-09-18	18.7		2014-12-23 16:39:00	1.90253
2015-02-15 10:21:00	4.02741		2009-09-19	17.8		2014-12-23 16:49:00	1.92206
2015-02-15 10:31:00	4.09684		2009-09-20	16.8		2014-12-23 16:59:00	1.91067
2015-02-15 10:41:00	3.86144		2009-09-21	16.5		2014-12-23 17:09:00	1.9611
2015-02-15 10:51:00	3.98161		2009-09-22	17.9		2014-12-23 17:19:00	1.94321
2015-02-15 11:01:00	3.88043		2009-09-23	19.5		2014-12-23 17:29:00	1.87322
2015-02-15 11:11:00	4.02741		2009-09-24	19.5		2014-12-23 17:39:00	1.85531
2015-02-15 11:21:00	4.35352		2009-09-25	20.2		2014-12-23 17:49:00	1.84879
2015-02-15 11:31:00	4.35824		2009-09-26	20.1		2014-12-23 17:59:00	1.85042
2015-02-15 11:41:00	4.4839		2009-09-27	18.2		2014-12-23 18:09:00	1.84227
2015-02-15 11:51:00	4.62658		2009-09-28	17.8		2014-12-23 18:19:00	1.83739
2015-02-15 12:01:00	4.71739		2009-09-29	18		2014-12-23 18:29:00	1.82435
2015-02-15 12:11:00	4.61561		2009-09-30	19.4		2014-12-23 18:39:00	1.84553
2015-02-15 12:21:00	4.71895		2009-10-01	16.8		2014-12-23 18:49:00	1.85694
2015-02-15 12:31:00	4.79559		2009-10-02	17.9		2014-12-23 18:59:00	1.83739
2015-02-15 12:41:00	5.08114		2009-10-03	13.6		2014-12-23 19:09:00	1.79175
2015-02-15 12:51:00	5.32376		2009-10-04	13.8		2014-12-23 19:19:00	1.7836
2015-02-15 13:01:00	5.18699		2009-10-05	16.6		2014-12-23 19:29:00	1.86345
2015-02-15 13:11:00	5.53625		2009-10-06	16.7		2014-12-23 19:39:00	1.84553
2015-02-15 13:21:00	5.80227		2009-10-07	17.6		2014-12-23 19:49:00	1.79664
2015-02-15 13:31:00	5.92263		2009-10-08	18.3		2014-12-23 19:59:00	1.78686
2015-02-15 13:41:00	6.04128		2009-10-09	19.4		2014-12-23 20:09:00	1.79012
2015-02-15 13:51:00	6.20436		2009-10-10	18.5		2014-12-23 20:19:00	1.80479
2015-02-15 14:01:00	6.47754		2009-10-11	16.9		2014-12-23 20:29:00	1.76239
2015-02-15 14:11:00	6.811		2009-10-12	16.4		2014-12-23 20:39:00	1.89276
2015-02-15 14:21:00	6.85221		2009-10-13	10.6		2014-12-23 20:49:00	1.89276
2015-02-15 14:31:00	6.92544		2009-10-14	6.8		2014-12-23 20:59:00	1.99849
2015-02-15 14:41:00	6.99709		2009-10-15	5.9		2014-12-23 21:09:00	1.92206
2015-02-15 14:51:00	7.06868		2009-10-16	5.2		2014-12-23 21:19:00	1.88462
2015-02-15 15:01:00	7.04888		2009-10-17	3.9		2014-12-23 21:29:00	1.87811
2015-02-15 15:11:00	7.10217		2009-10-18	7.7		2014-12-23 21:39:00	1.86345
2015-02-15 15:21:00	6.99251		2009-10-19	8.9		2014-12-23 21:49:00	1.85042
2015-02-15 15:31:00	6.89646		2009-10-20	9.7		2014-12-23 21:59:00	1.84879
2015-02-15 15:41:00	6.94221		2009-10-21	9.7		2014-12-23 22:09:00	1.85694
2015-02-15 15:51:00	6.98794		2009-10-22	11.7		2014-12-23 22:19:00	1.8439
2015-02-15 16:01:00	7.04431		2009-10-23	14.9		2014-12-23 22:29:00	1.85531
2015-02-15 16:11:00	7.16		2009-10-24	16.7		2014-12-23 22:39:00	1.85205
2015-02-15 16:21:00	7.10217		2009-10-25	16.1		2014-12-23 22:49:00	1.85531
2015-02-15 16:31:00	7.12804		2009-10-26	15.4		2014-12-23 22:59:00	1.82435
2015-02-15 16:41:00	7.08847		2009-10-27	13.5		2014-12-23 23:09:00	1.81294
2015-02-15 16:51:00	7.24363		2009-10-28	13.8		2014-12-23 23:19:00	1.78196
2015-02-15 17:01:00	7.14326		2009-10-29	12.8		2014-12-23 23:29:00	1.79664
2015-02-15 17:11:00	7.14022		2009-10-30	7.6		2014-12-23 23:39:00	1.78033
2015-02-15 17:21:00	7.03517		2009-10-31	6.7		2014-12-23 23:49:00	1.76565
2015-02-15 17:31:00	6.97118		2009-11-01	3.4		2014-12-23 23:59:00	1.7575
2015-02-15 17:41:00	6.91171		2009-11-02	3.2		2014-12-24 00:09:00	1.78033
2015-02-15 17:51:00	6.87815		2009-11-03	1.4		2014-12-24 00:19:00	1.85694
2015-02-15 18:01:00	6.84305		2009-11-04	5		2014-12-24 00:29:00	1.84064
2015-02-15 18:11:00	6.8171		2009-11-05	6		2014-12-24 00:39:00	1.80316
2015-02-15 18:21:00	6.83695		2009-11-06	7.7		2014-12-24 00:49:00	1.80316
2015-02-15 18:31:00	6.66277		2009-11-07	10.5		2014-12-24 00:59:00	1.81783
2015-02-15 18:41:00	6.42696		2009-11-08	13.2		2014-12-24 01:09:00	1.78849
2015-02-15 18:51:00	6.00432		2009-11-09	12.4		2014-12-24 01:19:00	1.78196
2015-02-15 19:01:00	5.96734		2009-11-10	11.4		2014-12-24 01:29:00	1.77055
2015-02-15 19:11:00	5.90258		2009-11-11	9		2014-12-24 01:39:00	1.73629
2015-02-15 19:21:00	5.793		2009-11-12	8		2014-12-24 01:49:00	1.73629
2015-02-15 19:31:00	5.58736		2009-11-13	9.1		2014-12-24 01:59:00	1.73629
2015-02-15 19:41:00	5.38586		2009-11-14	8		2014-12-24 02:09:00	1.74608
2015-02-15 19:51:00	5.44481		2009-11-15	7.9		2014-12-24 02:19:00	1.77381
2015-02-15 20:01:00	5.48667		2009-11-16	8.3		2014-12-24 02:29:00	1.79664
2015-02-15 20:11:00	5.25074		2009-11-17	8.6		2014-12-24 02:39:00	1.78033
2015-02-15 20:21:00	5.26162		2009-11-18	8.7		2014-12-24 02:49:00	1.80968
2015-02-15 20:31:00	5.26939		2009-11-19	11.1		2014-12-24 02:59:00	1.81946
2015-02-15 20:41:00	5.08269		2009-11-20	13.3		2014-12-24 03:09:00	1.84879
2015-02-15 20:51:00	5.1512		2009-11-21	8.6		2014-12-24 03:19:00	1.85531
2015-02-15 21:01:00	5.21032		2009-11-22	8.3		2014-12-24 03:29:00	1.82761
2015-02-15 21:11:00	5.09048		2009-11-23	8.9		2014-12-24 03:39:00	1.79338
2015-02-15 21:21:00	5.04063		2009-11-24	9.4		2014-12-24 03:49:00	1.7836
2015-02-15 21:31:00	5.01257		2009-11-25	11.9		2014-12-24 03:59:00	1.77381
2015-02-15 21:41:00	5.0531		2009-11-26	7.6		2014-12-24 04:09:00	1.76892
2015-02-15 21:51:00	4.86746		2009-11-27	7.9		2014-12-24 04:19:00	1.74608
2015-02-15 22:01:00	4.75337		2009-11-28	6.9		2014-12-24 04:29:00	1.76402
2015-02-15 22:11:00	4.63598		2009-11-29	9.9		2014-12-24 04:39:00	1.79012
2015-02-15 22:21:00	4.52783		2009-11-30	5.6		2014-12-24 04:49:00	1.80153
2015-02-15 22:31:00	4.34409		2009-12-01	5.2		2014-12-24 04:59:00	1.82924
2015-02-15 22:41:00	4.16779		2009-12-02	8.5		2014-12-24 05:09:00	1.83087
2015-02-15 22:51:00	4.04477		2009-12-03	10.1		2014-12-24 05:19:00	1.83739
2015-02-15 23:01:00	3.93578		2009-12-04	8.9		2014-12-24 05:29:00	1.85368
2015-02-15 23:11:00	4.08265		2009-12-05	8.1		2014-12-24 05:39:00	1.8325
2015-02-15 23:21:00	4.04635		2009-12-06	7		2014-12-24 05:49:00	1.8325
2015-02-15 23:31:00	4.15676		2009-12-07	5.4		2014-12-24 05:59:00	1.8325
2015-02-15 23:41:00	4.02741		2009-12-08	5.6		2014-12-24 06:09:00	1.83576
2015-02-15 23:51:00	4.1804		2009-12-09	5.3		2014-12-24 06:19:00	1.85368
2015-02-16 00:01:00	4.03688		2009-12-10	5.5		2014-12-24 06:29:00	1.84064
2015-02-16 00:11:00	4.3378		2009-12-11	4		2014-12-24 06:39:00	1.88788
2015-02-16 00:21:00	4.31107		2009-12-12	1.8		2014-12-24 06:49:00	1.91718
2015-02-16 00:31:00	4.03372		2009-12-13	-0.2		2014-12-24 06:59:00	1.90578
2015-02-16 00:41:00	3.96423		2009-12-14	0.4		2014-12-24 07:09:00	1.86671
2015-02-16 00:51:00	4.02583		2009-12-15	0.1		2014-12-24 07:19:00	1.83413
2015-02-16 01:01:00	4.10473		2009-12-16	-1.1		2014-12-24 07:29:00	1.83576
2015-02-16 01:11:00	4.10158		2009-12-17	-2.3		2014-12-24 07:39:00	1.83087
2015-02-16 01:21:00	3.79495		2009-12-18	-4.5		2014-12-24 07:49:00	1.85856
2015-02-16 01:31:00	3.08032		2009-12-19	-8		2014-12-24 07:59:00	1.86019
2015-02-16 01:41:00	3.52203		2009-12-20	-4.9		2014-12-24 08:09:00	1.81946
2015-02-16 01:51:00	3.9089		2009-12-21	-6.7		2014-12-24 08:19:00	1.79664
2015-02-16 02:01:00	4.20246		2009-12-22	-6.4		2014-12-24 08:29:00	1.81457
2015-02-16 02:11:00	4.17567		2009-12-23	-1.5		2014-12-24 08:39:00	1.82272
2015-02-16 02:21:00	4.13627		2009-12-24	-0.3		2014-12-24 08:49:00	1.79501
2015-02-16 02:31:00	3.94368		2009-12-25	0.8		2014-12-24 08:59:00	1.79338
2015-02-16 02:41:00	3.81237		2009-12-26	3.8		2014-12-24 09:09:00	1.83902
2015-02-16 02:51:00	3.46478		2009-12-27	2.8		2014-12-24 09:19:00	1.83902
2015-02-16 03:01:00	3.55223		2009-12-28	3.9		2014-12-24 09:29:00	1.87322
2015-02-16 03:11:00	3.62529		2009-12-29	0.9		2014-12-24 09:39:00	1.89764
2015-02-16 03:21:00	3.60783		2009-12-30	2.6		2014-12-24 09:49:00	1.86345
2015-02-16 03:31:00	3.33898		2009-12-31	3		2014-12-24 09:59:00	1.90741
2015-02-16 03:41:00	3.29115		2010-01-01	4.9		2014-12-24 10:09:00	1.89276
2015-02-16 03:51:00	3.20817		2010-01-02	7.7		2014-12-24 10:19:00	1.91067
2015-02-16 04:01:00	2.51657		2010-01-03	3.8		2014-12-24 10:29:00	1.93019
2015-02-16 04:11:00	2.02124		2010-01-04	0		2014-12-24 10:39:00	1.94971
2015-02-16 04:21:00	2.0651		2010-01-05	-2.4		2014-12-24 10:49:00	1.94321
2015-02-16 04:31:00	1.6383		2010-01-06	0.7		2014-12-24 10:59:00	1.94321
2015-02-16 04:41:00	1.27114		2010-01-07	2.4		2014-12-24 11:09:00	1.98549
2015-02-16 04:51:00	1.41891		2010-01-08	4.1		2014-12-24 11:19:00	1.97573
2015-02-16 05:01:00	2.00499		2010-01-09	5.2		2014-12-24 11:29:00	1.98061
2015-02-16 05:11:00	2.19		2010-01-10	5.3		2014-12-24 11:39:00	2.01799
2015-02-16 05:21:00	2.26937		2010-01-11	4.3		2014-12-24 11:49:00	2.07484
2015-02-16 05:31:00	2.15434		2010-01-12	3.9		2014-12-24 11:59:00	2.07484
2015-02-16 05:41:00	2.36803		2010-01-13	1.8		2014-12-24 12:09:00	2.04886
2015-02-16 05:51:00	2.45364		2010-01-14	0.7		2014-12-24 12:19:00	2.05698
2015-02-16 06:01:00	2.21107		2010-01-15	2.1		2014-12-24 12:29:00	2.06185
2015-02-16 06:11:00	1.85856		2010-01-16	0.9		2014-12-24 12:39:00	2.12839
2015-02-16 06:21:00	0.86708		2010-01-17	0.4		2014-12-24 12:49:00	2.13326
2015-02-16 06:31:00	0.54856		2010-01-18	0.7		2014-12-24 12:59:00	2.14137
2015-02-16 06:41:00	0.96132		2010-01-19	-1.6		2014-12-24 13:09:00	2.12839
2015-02-16 06:51:00	1.73792		2010-01-20	-3.3		2014-12-24 13:19:00	2.18676
2015-02-16 07:01:00	1.7575		2010-01-21	-4.8		2014-12-24 13:29:00	2.13001
2015-02-16 07:11:00	1.78849		2010-01-22	-6		2014-12-24 13:39:00	2.11217
2015-02-16 07:21:00	2.13975		2010-01-23	-5.7		2014-12-24 13:49:00	2.16731
2015-02-16 07:31:00	2.39712		2010-01-24	-7		2014-12-24 13:59:00	2.19324
2015-02-16 07:41:00	2.63098		2010-01-25	-11.3		2014-12-24 14:09:00	2.19487
2015-02-16 07:51:00	2.18676		2010-01-26	-11.8		2014-12-24 14:19:00	2.14785
2015-02-16 08:01:00	1.54507		2010-01-27	-7.4		2014-12-24 14:29:00	2.15596
2015-02-16 08:11:00	1.27278		2010-01-28	-7.9		2014-12-24 14:39:00	2.10405
2015-02-16 08:21:00	1.05047		2010-01-29	-3.7		2014-12-24 14:49:00	2.15434
2015-02-16 08:31:00	1.53689		2010-01-30	-2.7		2014-12-24 14:59:00	2.10892
2015-02-16 08:41:00	1.94321		2010-01-31	0.3		2014-12-24 15:09:00	2.11866
2015-02-16 08:51:00	1.84227		2010-02-01	0.1		2014-12-24 15:19:00	2.13326
2015-02-16 09:01:00	1.72323		2010-02-02	0.3		2014-12-24 15:29:00	2.13812
2015-02-16 09:11:00	1.54834		2010-02-03	-3.5		2014-12-24 15:39:00	2.12352
2015-02-16 09:21:00	2.04236		2010-02-04	0.6		2014-12-24 15:49:00	2.07646
2015-02-16 09:31:00	2.12515		2010-02-05	0.1		2014-12-24 15:59:00	2.06835
2015-02-16 09:41:00	2.36318		2010-02-06	-1.5		2014-12-24 16:09:00	2.02124
2015-02-16 09:51:00	2.43911		2010-02-07	0.6		2014-12-24 16:19:00	1.98711
2015-02-16 10:01:00	2.53592		2010-02-08	-1.9		2014-12-24 16:29:00	1.96273
2015-02-16 10:11:00	2.53753		2010-02-09	-2.9		2014-12-24 16:39:00	1.93182
2015-02-16 10:21:00	2.61649		2010-02-10	-4.2		2014-12-24 16:49:00	1.89927
2015-02-16 10:31:00	2.60682		2010-02-11	0.7		2014-12-24 16:59:00	1.85368
2015-02-16 10:41:00	2.84317		2010-02-12	1.9		2014-12-24 17:09:00	1.83902
2015-02-16 10:51:00	2.73876		2010-02-13	1.1		2014-12-24 17:19:00	1.81131
2015-02-16 11:01:00	2.96665		2010-02-14	3.5		2014-12-24 17:29:00	1.79501
2015-02-16 11:11:00	2.91857		2010-02-15	2.3		2014-12-24 17:39:00	1.78196
2015-02-16 11:21:00	2.89933		2010-02-16	-0.6		2014-12-24 17:49:00	1.76729
2015-02-16 11:31:00	2.94903		2010-02-17	1.7		2014-12-24 17:59:00	1.7575
2015-02-16 11:41:00	3.20817		2010-02-18	2.1		2014-12-24 18:09:00	1.7787
2015-02-16 11:51:00	3.20817		2010-02-19	3.4		2014-12-24 18:19:00	1.83413
2015-02-16 12:01:00	3.17463		2010-02-20	5		2014-12-24 18:29:00	1.80805
2015-02-16 12:11:00	3.10591		2010-02-21	5.1		2014-12-24 18:39:00	1.78686
2015-02-16 12:21:00	3.25446		2010-02-22	3.8		2014-12-24 18:49:00	1.81294
2015-02-16 12:31:00	3.21775		2010-02-23	6.7		2014-12-24 18:59:00	1.86182
2015-02-16 12:41:00	3.12349		2010-02-24	8.3		2014-12-24 19:09:00	1.92531
2015-02-16 12:51:00	3.25286		2010-02-25	7.3		2014-12-24 19:19:00	1.96273
2015-02-16 13:01:00	3.44091		2010-02-26	8.2		2014-12-24 19:29:00	1.97736
2015-02-16 13:11:00	3.65862		2010-02-27	8		2014-12-24 19:39:00	1.94646
2015-02-16 13:21:00	3.61418		2010-02-28	5.5		2014-12-24 19:49:00	1.89602
2015-02-16 13:31:00	3.91522		2010-03-01	8.3		2014-12-24 19:59:00	1.84879
2015-02-16 13:41:00	3.99424		2010-03-02	9.5		2014-12-24 20:09:00	1.83087
2015-02-16 13:51:00	3.97055		2010-03-03	9.5		2014-12-24 20:19:00	1.83413
2015-02-16 14:01:00	4.0716		2010-03-04	5.1		2014-12-24 20:29:00	1.8162
2015-02-16 14:11:00	4.10631		2010-03-05	2.2		2014-12-24 20:39:00	1.80968
2015-02-16 14:21:00	4.11735		2010-03-06	1		2014-12-24 20:49:00	1.81946
2015-02-16 14:31:00	4.04477		2010-03-07	0		2014-12-24 20:59:00	1.81457
2015-02-16 14:41:00	4.16622		2010-03-08	0		2014-12-24 21:09:00	1.79338
2015-02-16 14:51:00	4.04951		2010-03-09	-1.3		2014-12-24 21:19:00	1.7836
2015-02-16 15:01:00	4.38967		2010-03-10	-1.4		2014-12-24 21:29:00	1.77707
2015-02-16 15:11:00	4.50586		2010-03-11	0.4		2014-12-24 21:39:00	1.77055
2015-02-16 15:21:00	4.62188		2010-03-12	3.3		2014-12-24 21:49:00	1.76729
2015-02-16 15:31:00	4.57487		2010-03-13	4.3		2014-12-24 21:59:00	1.77055
2015-02-16 15:41:00	4.46977		2010-03-14	5.4		2014-12-24 22:09:00	1.77218
2015-02-16 15:51:00	4.53724		2010-03-15	5.6		2014-12-24 22:19:00	1.77218
2015-02-16 16:01:00	4.62502		2010-03-16	5.6		2014-12-24 22:29:00	1.77055
2015-02-16 16:11:00	4.49017		2010-03-17	6.2		2014-12-24 22:39:00	1.73629
2015-02-16 16:21:00	4.51842		2010-03-18	7.4		2014-12-24 22:49:00	1.72976
2015-02-16 16:31:00	4.54822		2010-03-19	8.5		2014-12-24 22:59:00	1.7167
2015-02-16 16:41:00	4.59211		2010-03-20	10.8		2014-12-24 23:09:00	1.68568
2015-02-16 16:51:00	4.49017		2010-03-21	13.8		2014-12-24 23:19:00	1.65954
2015-02-16 17:01:00	4.60935		2010-03-22	16		2014-12-24 23:29:00	1.69221
2015-02-16 17:11:00	4.27803		2010-03-23	13		2014-12-24 23:39:00	1.70691
2015-02-16 17:21:00	4.11419		2010-03-24	12		2014-12-24 23:49:00	1.71017
2015-02-16 17:31:00	3.98792		2010-03-25	12.7		2014-12-24 23:59:00	1.71507
2015-02-16 17:41:00	4.11419		2010-03-26	14.6		2014-12-25 00:09:00	1.72323
2015-02-16 17:51:00	4.15519		2010-03-27	11.5		2014-12-25 00:19:00	1.71833
2015-02-16 18:01:00	4.24497		2010-03-28	11.8		2014-12-25 00:29:00	1.74281
2015-02-16 18:11:00	4.14415		2010-03-29	14.5		2014-12-25 00:39:00	1.7575
2015-02-16 18:21:00	4.14888		2010-03-30	12.7		2014-12-25 00:49:00	1.75913
2015-02-16 18:31:00	3.99108		2010-03-31	13.7		2014-12-25 00:59:00	1.78033
2015-02-16 18:41:00	3.75852		2010-04-01	11.6		2014-12-25 01:09:00	1.79501
2015-02-16 18:51:00	3.86777		2010-04-02	11.2		2014-12-25 01:19:00	1.81131
2015-02-16 19:01:00	4.13469		2010-04-03	12.4		2014-12-25 01:29:00	1.81946
2015-02-16 19:11:00	4.22923		2010-04-04	10.8		2014-12-25 01:39:00	1.85042
2015-02-16 19:21:00	4.21978		2010-04-05	12.7		2014-12-25 01:49:00	1.87811
2015-02-16 19:31:00	4.32994		2010-04-06	11.7		2014-12-25 01:59:00	1.88299
2015-02-16 19:41:00	4.39753		2010-04-07	13.2		2014-12-25 02:09:00	1.89439
2015-02-16 19:51:00	4.06687		2010-04-08	12.7		2014-12-25 02:19:00	1.90578
2015-02-16 20:01:00	4.02267		2010-04-09	12.9		2014-12-25 02:29:00	1.92043
2015-02-16 20:11:00	3.62529		2010-04-10	13		2014-12-25 02:39:00	1.93833
2015-02-16 20:21:00	3.91681		2010-04-11	12.5		2014-12-25 02:49:00	1.95297
2015-02-16 20:31:00	3.76327		2010-04-12	13.8		2014-12-25 02:59:00	1.95297
2015-02-16 20:41:00	3.96423		2010-04-13	13.9		2014-12-25 03:09:00	1.98061
2015-02-16 20:51:00	4.31578		2010-04-14	12.2		2014-12-25 03:19:00	1.97411
2015-02-16 21:01:00	4.41952		2010-04-15	10.1		2014-12-25 03:29:00	1.96923
2015-02-16 21:11:00	4.56389		2010-04-16	11.7		2014-12-25 03:39:00	1.9611
2015-02-16 21:21:00	4.56546		2010-04-17	13.7		2014-12-25 03:49:00	1.9611
2015-02-16 21:31:00	4.75806		2010-04-18	14.6		2014-12-25 03:59:00	1.95622
2015-02-16 21:41:00	4.65477		2010-04-19	14		2014-12-25 04:09:00	1.93345
2015-02-16 21:51:00	4.70643		2010-04-20	12		2014-12-25 04:19:00	1.92043
2015-02-16 22:01:00	4.80496		2010-04-21	15.3		2014-12-25 04:29:00	1.91229
2015-02-16 22:11:00	4.81747		2010-04-22	12.3		2014-12-25 04:39:00	1.89276
2015-02-16 22:21:00	4.75337		2010-04-23	14.1		2014-12-25 04:49:00	1.87648
2015-02-16 22:31:00	4.80184		2010-04-24	16		2014-12-25 04:59:00	1.86997
2015-02-16 22:41:00	4.76744		2010-04-25	18.5		2014-12-25 05:09:00	1.84227
2015-02-16 22:51:00	4.61091		2010-04-26	15.5		2014-12-25 05:19:00	1.8439
2015-02-16 23:01:00	4.60465		2010-04-27	14.5		2014-12-25 05:29:00	1.82761
2015-02-16 23:11:00	4.41481		2010-04-28	13.3		2014-12-25 05:39:00	1.8439
2015-02-16 23:21:00	4.26229		2010-04-29	15		2014-12-25 05:49:00	1.88136
2015-02-16 23:31:00	4.33308		2010-04-30	16.2		2014-12-25 05:59:00	1.83576
2015-02-16 23:41:00	3.66973		2010-05-01	18		2014-12-25 06:09:00	1.78686
2015-02-16 23:51:00	3.33898		2010-05-02	19.3		2014-12-25 06:19:00	1.74771
2015-02-17 00:01:00	2.77412		2010-05-03	20.4		2014-12-25 06:29:00	1.72323
2015-02-17 00:11:00	2.59877		2010-05-04	19.2		2014-12-25 06:39:00	1.69384
2015-02-17 00:21:00	2.87848		2010-05-05	20		2014-12-25 06:49:00	1.68241
2015-02-17 00:31:00	2.83996		2010-05-06	19		2014-12-25 06:59:00	1.69221
2015-02-17 00:41:00	2.19324		2010-05-07	17.6		2014-12-25 07:09:00	1.74118
2015-02-17 00:51:00	1.71344		2010-05-08	15.6		2014-12-25 07:19:00	1.78033
2015-02-17 01:01:00	1.25141		2010-05-09	15.8		2014-12-25 07:29:00	1.75424
2015-02-17 01:11:00	1.52543		2010-05-10	19		2014-12-25 07:39:00	1.79338
2015-02-17 01:21:00	1.65301		2010-05-11	18.6		2014-12-25 07:49:00	1.79664
2015-02-17 01:31:00	2.03262		2010-05-12	21.1		2014-12-25 07:59:00	1.77544
2015-02-17 01:41:00	1.72486		2010-05-13	17.3		2014-12-25 08:09:00	1.79827
2015-02-17 01:51:00	1.91229		2010-05-14	18.3		2014-12-25 08:19:00	1.82272
2015-02-17 02:01:00	1.5778		2010-05-15	15.9		2014-12-25 08:29:00	1.79501
2015-02-17 02:11:00	1.96435		2010-05-16	13.5		2014-12-25 08:39:00	1.77055
2015-02-17 02:21:00	1.42055		2010-05-17	10.3		2014-12-25 08:49:00	1.76565
2015-02-17 02:31:00	1.06037		2010-05-18	11.4		2014-12-25 08:59:00	1.7575
2015-02-17 02:41:00	0.72628		2010-05-19	12.9		2014-12-25 09:09:00	1.78033
2015-02-17 02:51:00	0.59678		2010-05-20	16.2		2014-12-25 09:19:00	1.75097
2015-02-17 03:01:00	1.15431		2010-05-21	15.3		2014-12-25 09:29:00	1.70854
2015-02-17 03:11:00	1.2399		2010-05-22	17.8		2014-12-25 09:39:00	1.7118
2015-02-17 03:21:00	1.12137		2010-05-23	17.7		2014-12-25 09:49:00	1.7167
2015-02-17 03:31:00	1.71017		2010-05-24	18.1		2014-12-25 09:59:00	1.74118
2015-02-17 03:41:00	2.1365		2010-05-25	20.2		2014-12-25 10:09:00	1.73955
2015-02-17 03:51:00	2.06672		2010-05-26	22.1		2014-12-25 10:19:00	1.7526
2015-02-17 04:01:00	2.00824		2010-05-27	21.6		2014-12-25 10:29:00	1.74118
2015-02-17 04:11:00	2.26289		2010-05-28	22.3		2014-12-25 10:39:00	1.74281
2015-02-17 04:21:00	1.82761		2010-05-29	21.9		2014-12-25 10:49:00	1.74771
2015-02-17 04:31:00	1.62195		2010-05-30	20.2		2014-12-25 10:59:00	1.77544
2015-02-17 04:41:00	2.26127		2010-05-31	18.8		2014-12-25 11:09:00	1.78686
2015-02-17 04:51:00	2.3082		2010-06-01	15.7		2014-12-25 11:19:00	1.82109
2015-02-17 05:01:00	2.41004		2010-06-02	16		2014-12-25 11:29:00	1.84716
2015-02-17 05:11:00	2.02124		2010-06-03	16.8		2014-12-25 11:39:00	1.8162
2015-02-17 05:21:00	2.19		2010-06-04	18.2		2014-12-25 11:49:00	1.79338
2015-02-17 05:31:00	2.07971		2010-06-05	21.3		2014-12-25 11:59:00	1.81783
2015-02-17 05:41:00	1.5778		2010-06-06	21.6		2014-12-25 12:09:00	1.84064
2015-02-17 05:51:00	0.96463		2010-06-07	21.4		2014-12-25 12:19:00	1.82924
2015-02-17 06:01:00	0.18987		2010-06-08	22.6		2014-12-25 12:29:00	1.85531
2015-02-17 06:11:00	0.23504		2010-06-09	23.3		2014-12-25 12:39:00	1.86997
2015-02-17 06:21:00	0.50364		2010-06-10	25.2		2014-12-25 12:49:00	1.85205
2015-02-17 06:31:00	0.78926		2010-06-11	25.5		2014-12-25 12:59:00	1.83576
2015-02-17 06:41:00	1.34343		2010-06-12	26.9		2014-12-25 13:09:00	1.8439
2015-02-17 06:51:00	1.74281		2010-06-13	28.5		2014-12-25 13:19:00	1.82272
2015-02-17 07:01:00	2.26451		2010-06-14	28.6		2014-12-25 13:29:00	1.82598
2015-02-17 07:11:00	2.83194		2010-06-15	27.2		2014-12-25 13:39:00	1.86834
2015-02-17 07:21:00	2.7468		2010-06-16	25.5		2014-12-25 13:49:00	1.83413
2015-02-17 07:31:00	2.43427		2010-06-17	24.4		2014-12-25 13:59:00	1.83413
2015-02-17 07:41:00	2.1073		2010-06-18	22		2014-12-25 14:09:00	1.83413
2015-02-17 07:51:00	1.70364		2010-06-19	21.3		2014-12-25 14:19:00	1.82435
2015-02-17 08:01:00	1.71017		2010-06-20	21.6		2014-12-25 14:29:00	1.82109
2015-02-17 08:11:00	1.54343		2010-06-21	20.6		2014-12-25 14:39:00	1.8162
2015-02-17 08:21:00	1.4812		2010-06-22	19		2014-12-25 14:49:00	1.80479
2015-02-17 08:31:00	1.60724		2010-06-23	19.1		2014-12-25 14:59:00	1.79012
2015-02-17 08:41:00	1.75587		2010-06-24	20.1		2014-12-25 15:09:00	1.7787
2015-02-17 08:51:00	1.83739		2010-06-25	20.8		2014-12-25 15:19:00	1.76076
2015-02-17 09:01:00	1.80153		2010-06-26	19.5		2014-12-25 15:29:00	1.75587
2015-02-17 09:11:00	1.31715		2010-06-27	20.7		2014-12-25 15:39:00	1.76565
2015-02-17 09:21:00	1.35656		2010-06-28	21.6		2014-12-25 15:49:00	1.75097
2015-02-17 09:31:00	1.68241		2010-06-29	24.4		2014-12-25 15:59:00	1.74281
2015-02-17 09:41:00	1.78033		2010-06-30	23		2014-12-25 16:09:00	1.7526
2015-02-17 09:51:00	1.82272		2010-07-01	23.6		2014-12-25 16:19:00	1.75424
2015-02-17 10:01:00	1.75587		2010-07-02	23.1		2014-12-25 16:29:00	1.75913
2015-02-17 10:11:00	1.5778		2010-07-03	22.8		2014-12-25 16:39:00	1.77707
2015-02-17 10:21:00	1.98061		2010-07-04	22.7		2014-12-25 16:49:00	1.78686
2015-02-17 10:31:00	2.37288		2010-07-05	22.1		2014-12-25 16:59:00	1.76729
2015-02-17 10:41:00	2.28231		2010-07-06	23.3		2014-12-25 17:09:00	1.77544
2015-02-17 10:51:00	2.26613		2010-07-07	21.8		2014-12-25 17:19:00	1.76239
2015-02-17 11:01:00	2.19649		2010-07-08	20.4		2014-12-25 17:29:00	1.73955
2015-02-17 11:11:00	1.93182		2010-07-09	21.3		2014-12-25 17:39:00	1.73302
2015-02-17 11:21:00	1.23825		2010-07-10	23.3		2014-12-25 17:49:00	1.73792
2015-02-17 11:31:00	0.91505		2010-07-11	24.6		2014-12-25 17:59:00	1.75424
2015-02-17 11:41:00	0.88197		2010-07-12	26		2014-12-25 18:09:00	1.7787
2015-02-17 11:51:00	0.92331		2010-07-13	25.9		2014-12-25 18:19:00	1.77381
2015-02-17 12:01:00	1.22838		2010-07-14	26.7		2014-12-25 18:29:00	1.77218
2015-02-17 12:11:00	1.38446		2010-07-15	26.7		2014-12-25 18:39:00	1.76239
2015-02-17 12:21:00	1.62686		2010-07-16	27.3		2014-12-25 18:49:00	1.76565
2015-02-17 12:31:00	1.5287		2010-07-17	28		2014-12-25 18:59:00	1.76239
2015-02-17 12:41:00	1.52706		2010-07-18	28.3		2014-12-25 19:09:00	1.76076
2015-02-17 12:51:00	0.69144		2010-07-19	26.4		2014-12-25 19:19:00	1.79664
2015-02-17 13:01:00	0.77767		2010-07-20	26.7		2014-12-25 19:29:00	1.81294
2015-02-17 13:11:00	0.83563		2010-07-21	27.4		2014-12-25 19:39:00	1.82924
2015-02-17 13:21:00	1.11478		2010-07-22	27.8		2014-12-25 19:49:00	1.92694
2015-02-17 13:31:00	1.29744		2010-07-23	27.2		2014-12-25 19:59:00	1.96273
2015-02-17 13:41:00	1.52215		2010-07-24	26.8		2014-12-25 20:09:00	1.94483
2015-02-17 13:51:00	1.52215		2010-07-25	22.4		2014-12-25 20:19:00	1.91067
2015-02-17 14:01:00	1.43859		2010-07-26	20.6		2014-12-25 20:29:00	1.91718
2015-02-17 14:11:00	1.23661		2010-07-27	21.5		2014-12-25 20:39:00	1.9188
2015-02-17 14:21:00	1.17901		2010-07-28	20.9		2014-12-25 20:49:00	1.92857
2015-02-17 14:31:00	1.61214		2010-07-29	22.1		2014-12-25 20:59:00	1.87811
2015-02-17 14:41:00	1.90253		2010-07-30	24.1		2014-12-25 21:09:00	1.85368
2015-02-17 14:51:00	1.71833		2010-07-31	25.5		2014-12-25 21:19:00	1.7999
2015-02-17 15:01:00	1.58434		2010-08-01	24.3		2014-12-25 21:29:00	1.80153
2015-02-17 15:11:00	1.6383		2010-08-02	26		2014-12-25 21:39:00	1.79827
2015-02-17 15:21:00	1.84227		2010-08-03	28		2014-12-25 21:49:00	1.79501
2015-02-17 15:31:00	2.26613		2010-08-04	25.6		2014-12-25 21:59:00	1.78033
2015-02-17 15:41:00	2.39227		2010-08-05	24.9		2014-12-25 22:09:00	1.81783
2015-02-17 15:51:00	2.32438		2010-08-06	26		2014-12-25 22:19:00	1.8325
2015-02-17 16:01:00	2.39227		2010-08-07	24.1		2014-12-25 22:29:00	1.80805
2015-02-17 16:11:00	2.50851		2010-08-08	23.7		2014-12-25 22:39:00	1.7787
2015-02-17 16:21:00	2.29526		2010-08-09	24		2014-12-25 22:49:00	1.75424
2015-02-17 16:31:00	2.10405		2010-08-10	24.9		2014-12-25 22:59:00	1.75587
2015-02-17 16:41:00	2.47624		2010-08-11	26.2		2014-12-25 23:09:00	1.74118
2015-02-17 16:51:00	2.58266		2010-08-12	27.1		2014-12-25 23:19:00	1.74934
2015-02-17 17:01:00	2.62132		2010-08-13	29.4		2014-12-25 23:29:00	1.77055
2015-02-17 17:11:00	2.62937		2010-08-14	29.3		2014-12-25 23:39:00	1.76729
2015-02-17 17:21:00	2.61165		2010-08-15	29.1		2014-12-25 23:49:00	1.72486
2015-02-17 17:31:00	2.64547		2010-08-16	28.7		2014-12-25 23:59:00	1.71344
2015-02-17 17:41:00	2.77573		2010-08-17	26		2014-12-26 00:09:00	1.69058
2015-02-17 17:51:00	2.35834		2010-08-18	24.3		2014-12-26 00:19:00	1.66934
2015-02-17 18:01:00	2.44557		2010-08-19	24.2		2014-12-26 00:29:00	1.66444
2015-02-17 18:11:00	2.48108		2010-08-20	25.6		2014-12-26 00:39:00	1.63503
2015-02-17 18:21:00	2.76127		2010-08-21	22		2014-12-26 00:49:00	1.63013
2015-02-17 18:31:00	3.00189		2010-08-22	23.6		2014-12-26 00:59:00	1.65791
2015-02-17 18:41:00	2.8223		2010-08-23	23.4		2014-12-26 01:09:00	1.68241
2015-02-17 18:51:00	2.72269		2010-08-24	24.3		2014-12-26 01:19:00	1.65791
2015-02-17 19:01:00	2.73876		2010-08-25	24.8		2014-12-26 01:29:00	1.63013
2015-02-17 19:11:00	2.61165		2010-08-26	27.3		2014-12-26 01:39:00	1.60233
2015-02-17 19:21:00	2.64064		2010-08-27	25.1		2014-12-26 01:49:00	1.60887
2015-02-17 19:31:00	2.63581		2010-08-28	26.5		2014-12-26 01:59:00	1.61868
2015-02-17 19:41:00	2.56493		2010-08-29	22.5		2014-12-26 02:09:00	1.63176
2015-02-17 19:51:00	2.26937		2010-08-30	20.4		2014-12-26 02:19:00	1.61214
2015-02-17 20:01:00	2.19649		2010-08-31	18.5		2014-12-26 02:29:00	1.62522
2015-02-17 20:11:00	1.81946		2010-09-01	16.2		2014-12-26 02:39:00	1.62849
2015-02-17 20:21:00	1.58925		2010-09-02	18		2014-12-26 02:49:00	1.63176
2015-02-17 20:31:00	1.95459		2010-09-03	17.3		2014-12-26 02:59:00	1.62686
2015-02-17 20:41:00	1.47793		2010-09-04	16.4		2014-12-26 03:09:00	1.6007
2015-02-17 20:51:00	1.31387		2010-09-05	17.9		2014-12-26 03:19:00	1.6007
2015-02-17 21:01:00	1.44187		2010-09-06	19.5		2014-12-26 03:29:00	1.59252
2015-02-17 21:11:00	0.99601		2010-09-07	20.7		2014-12-26 03:39:00	1.57289
2015-02-17 21:21:00	0.74783		2010-09-08	22		2014-12-26 03:49:00	1.52543
2015-02-17 21:31:00	0.87535		2010-09-09	20.1		2014-12-26 03:59:00	1.47137
2015-02-17 21:41:00	1.01252		2010-09-10	19.5		2014-12-26 04:09:00	1.45662
2015-02-17 21:51:00	1.43039		2010-09-11	19		2014-12-26 04:19:00	1.41891
2015-02-17 22:01:00	1.08016		2010-09-12	19.5		2014-12-26 04:29:00	1.38611
2015-02-17 22:11:00	1.28593		2010-09-13	19.5		2014-12-26 04:39:00	1.36149
2015-02-17 22:21:00	1.28593		2010-09-14	20.1		2014-12-26 04:49:00	1.33193
2015-02-17 22:31:00	1.37134		2010-09-15	20.2		2014-12-26 04:59:00	1.30565
2015-02-17 22:41:00	1.29579		2010-09-16	21.1		2014-12-26 05:09:00	1.281
2015-02-17 22:51:00	1.60887		2010-09-17	22.3		2014-12-26 05:19:00	1.2218
2015-02-17 23:01:00	1.53689		2010-09-18	22.4		2014-12-26 05:29:00	1.19547
2015-02-17 23:11:00	1.37954		2010-09-19	21.1		2014-12-26 05:39:00	1.2037
2015-02-17 23:21:00	1.42547		2010-09-20	18		2014-12-26 05:49:00	1.18395
2015-02-17 23:31:00	1.67588		2010-09-21	19.2		2014-12-26 05:59:00	1.14608
2015-02-17 23:41:00	1.05047		2010-09-22	17.6		2014-12-26 06:09:00	1.13125
2015-02-17 23:51:00	1.24976		2010-09-23	18.5		2014-12-26 06:19:00	1.14114
2015-02-18 00:01:00	1.34835		2010-09-24	18.1		2014-12-26 06:29:00	1.16914
2015-02-18 00:11:00	0.86708		2010-09-25	18.7		2014-12-26 06:39:00	1.1856
2015-02-18 00:21:00	1.31551		2010-09-26	19.9		2014-12-26 06:49:00	1.13784
2015-02-18 00:31:00	1.74281		2010-09-27	16.3		2014-12-26 06:59:00	1.08016
2015-02-18 00:41:00	1.64647		2010-09-28	18.4		2014-12-26 07:09:00	1.03892
2015-02-18 00:51:00	1.00756		2010-09-29	17.6		2014-12-26 07:19:00	1.02902
2015-02-18 01:01:00	1.56635		2010-09-30	14.7		2014-12-26 07:29:00	1.02407
2015-02-18 01:11:00	1.52215		2010-10-01	13.6		2014-12-26 07:39:00	1.02407
2015-02-18 01:21:00	1.1609		2010-10-02	14.7		2014-12-26 07:49:00	1.00591
2015-02-18 01:31:00	1.67261		2010-10-03	12.5		2014-12-26 07:59:00	0.97123
2015-02-18 01:41:00	1.35656		2010-10-04	11		2014-12-26 08:09:00	0.93984
2015-02-18 01:51:00	1.17572		2010-10-05	9.1		2014-12-26 08:19:00	0.90678
2015-02-18 02:01:00	0.77932		2010-10-06	9.3		2014-12-26 08:29:00	0.85881
2015-02-18 02:11:00	1.28922		2010-10-07	8.1		2014-12-26 08:39:00	0.82239
2015-02-18 02:21:00	1.31387		2010-10-08	9.1		2014-12-26 08:49:00	0.81742
2015-02-18 02:31:00	1.59252		2010-10-09	8.5		2014-12-26 08:59:00	0.83067
2015-02-18 02:41:00	1.36641		2010-10-10	11.6		2014-12-26 09:09:00	0.84226
2015-02-18 02:51:00	1.00426		2010-10-11	11		2014-12-26 09:19:00	0.85384
2015-02-18 03:01:00	1.50086		2010-10-12	11.6		2014-12-26 09:29:00	0.86377
2015-02-18 03:11:00	0.9448		2010-10-13	13		2014-12-26 09:39:00	0.88362
2015-02-18 03:21:00	1.0851		2010-10-14	11.4		2014-12-26 09:49:00	0.88859
2015-02-18 03:31:00	1.06037		2010-10-15	11.2		2014-12-26 09:59:00	0.89024
2015-02-18 03:41:00	1.47793		2010-10-16	11.3		2014-12-26 10:09:00	0.8952
2015-02-18 03:51:00	1.46482		2010-10-17	12.3		2014-12-26 10:19:00	0.8952
2015-02-18 04:01:00	0.98114		2010-10-18	12.6		2014-12-26 10:29:00	0.90843
2015-02-18 04:11:00	0.91835		2010-10-19	12.8		2014-12-26 10:39:00	0.91835
2015-02-18 04:21:00	1.61705		2010-10-20	12.8		2014-12-26 10:49:00	0.91174
2015-02-18 04:31:00	1.59579		2010-10-21	11.5		2014-12-26 10:59:00	0.91174
2015-02-18 04:41:00	1.4599		2010-10-22	7		2014-12-26 11:09:00	0.9448
2015-02-18 04:51:00	0.87866		2010-10-23	7.9		2014-12-26 11:19:00	0.95802
2015-02-18 05:01:00	0.90016		2010-10-24	9.3		2014-12-26 11:29:00	0.95802
2015-02-18 05:11:00	-0.12557		2010-10-25	9.3		2014-12-26 11:39:00	0.96793
2015-02-18 05:21:00	-0.37172		2010-10-26	13.5		2014-12-26 11:49:00	0.94645
2015-02-18 05:31:00	-0.21649		2010-10-27	8.6		2014-12-26 11:59:00	0.94976
2015-02-18 05:41:00	-0.13734		2010-10-28	5.6		2014-12-26 12:09:00	0.94976
2015-02-18 05:51:00	-0.29405		2010-10-29	5.3		2014-12-26 12:19:00	0.94149
2015-02-18 06:01:00	0.26178		2010-10-30	6.2		2014-12-26 12:29:00	0.92662
2015-02-18 06:11:00	-0.33456		2010-10-31	7.7		2014-12-26 12:39:00	0.91174
2015-02-18 06:21:00	-1.09099		2010-11-01	7.1		2014-12-26 12:49:00	0.90843
2015-02-18 06:31:00	-0.69366		2010-11-02	7.5		2014-12-26 12:59:00	0.92662
2015-02-18 06:41:00	-1.10468		2010-11-03	7.4		2014-12-26 13:09:00	0.91339
2015-02-18 06:51:00	-1.39302		2010-11-04	14.1		2014-12-26 13:19:00	0.8555
2015-02-18 07:01:00	-1.55675		2010-11-05	14.5		2014-12-26 13:29:00	0.81577
2015-02-18 07:11:00	-2.10501		2010-11-06	16.3		2014-12-26 13:39:00	0.73788
2015-02-18 07:21:00	-2.04226		2010-11-07	12.8		2014-12-26 13:49:00	0.7213
2015-02-18 07:31:00	-2.13641		2010-11-08	12.6		2014-12-26 13:59:00	0.68978
2015-02-18 07:41:00	-1.86315		2010-11-09	14.5		2014-12-26 14:09:00	0.7213
2015-02-18 07:51:00	-2.06317		2010-11-10	17		2014-12-26 14:19:00	0.72628
2015-02-18 08:01:00	-2.84271		2010-11-11	16.4		2014-12-26 14:29:00	0.71632
2015-02-18 08:11:00	-3.61469		2010-11-12	14.3		2014-12-26 14:39:00	0.66488
2015-02-18 08:21:00	-3.64345		2010-11-13	14		2014-12-26 14:49:00	0.69144
2015-02-18 08:31:00	-2.92771		2010-11-14	12.6		2014-12-26 14:59:00	0.71964
2015-02-18 08:41:00	-4.25864		2010-11-15	13.3		2014-12-26 15:09:00	0.70305
2015-02-18 08:51:00	-4.62058		2010-11-16	13.2		2014-12-26 15:19:00	0.63167
2015-02-18 09:01:00	-4.57473		2010-11-17	10.3		2014-12-26 15:29:00	0.6599
2015-02-18 09:11:00	-3.9175		2010-11-18	12.7		2014-12-26 15:39:00	0.67318
2015-02-18 09:21:00	-3.90123		2010-11-19	11.2		2014-12-26 15:49:00	0.68646
2015-02-18 09:31:00	-3.16039		2010-11-20	12.2		2014-12-26 15:59:00	0.68812
2015-02-18 09:41:00	-3.3602		2010-11-21	10.1		2014-12-26 16:09:00	0.67318
2015-02-18 09:51:00	-2.89227		2010-11-22	8.4		2014-12-26 16:19:00	0.68646
2015-02-18 10:01:00	-2.5235		2010-11-23	11.8		2014-12-26 16:29:00	0.62669
2015-02-18 10:11:00	-2.07188		2010-11-24	7.3		2014-12-26 16:39:00	0.60675
2015-02-18 10:21:00	-2.09454		2010-11-25	5.6		2014-12-26 16:49:00	0.61838
2015-02-18 10:31:00	-1.90135		2010-11-26	5.3		2014-12-26 16:59:00	0.57683
2015-02-18 10:41:00	-1.67599		2010-11-27	6		2014-12-26 17:09:00	0.57683
2015-02-18 10:51:00	-1.20577		2010-11-28	4		2014-12-26 17:19:00	0.53692
2015-02-18 11:01:00	-0.95083		2010-11-29	9.8		2014-12-26 17:29:00	0.54024
2015-02-18 11:11:00	-0.93718		2010-11-30	5.5		2014-12-26 17:39:00	0.472
2015-02-18 11:21:00	-0.61046		2010-12-01	2.8		2014-12-26 17:49:00	0.44201
2015-02-18 11:31:00	-0.41905		2010-12-02	2.2		2014-12-26 17:59:00	0.48366
2015-02-18 11:41:00	-0.33287		2010-12-03	3.3		2014-12-26 18:09:00	0.45701
2015-02-18 11:51:00	0.18987		2010-12-04	5		2014-12-26 18:19:00	0.35531
2015-02-18 12:01:00	0.51529		2010-12-05	2.3		2014-12-26 18:29:00	0.24507
2015-02-18 12:11:00	0.32025		2010-12-06	0.8		2014-12-26 18:39:00	0.15137
2015-02-18 12:21:00	0.76772		2010-12-07	4.8		2014-12-26 18:49:00	0.1229
2015-02-18 12:31:00	1.11478		2010-12-08	6.6		2014-12-26 18:59:00	0.08771
2015-02-18 12:41:00	1.40907		2010-12-09	7.9		2014-12-26 19:09:00	0.16812
2015-02-18 12:51:00	1.55489		2010-12-10	3.6		2014-12-26 19:19:00	0.16142
2015-02-18 13:01:00	1.77381		2010-12-11	0.3		2014-12-26 19:29:00	0.12458
2015-02-18 13:11:00	2.17055		2010-12-12	2.3		2014-12-26 19:39:00	0.07262
2015-02-18 13:21:00	2.44557		2010-12-13	2.5		2014-12-26 19:49:00	0.07094
2015-02-18 13:31:00	2.75644		2010-12-14	-0.3		2014-12-26 19:59:00	0.02565
2015-02-18 13:41:00	2.94422		2010-12-15	-1.7		2014-12-26 20:09:00	-0.01631
2015-02-18 13:51:00	3.16185		2010-12-16	-5.9		2014-12-26 20:19:00	-0.00288
2015-02-18 14:01:00	3.37085		2010-12-17	-4.1		2014-12-26 20:29:00	-0.03647
2015-02-18 14:11:00	3.55223		2010-12-18	-7		2014-12-26 20:39:00	0.00887
2015-02-18 14:21:00	3.88201		2010-12-19	-1.7		2014-12-26 20:49:00	0.04579
2015-02-18 14:31:00	3.98161		2010-12-20	-4.4		2014-12-26 20:59:00	0.00887
2015-02-18 14:41:00	4.15203		2010-12-21	2		2014-12-26 21:09:00	-0.07512
2015-02-18 14:51:00	4.1867		2010-12-22	2.2		2014-12-26 21:19:00	-0.05831
2015-02-18 15:01:00	4.20246		2010-12-23	4.1		2014-12-26 21:29:00	-0.05999
2015-02-18 15:11:00	4.27331		2010-12-24	2.7		2014-12-26 21:39:00	-0.07007
2015-02-18 15:21:00	4.40381		2010-12-25	4.1		2014-12-26 21:49:00	-0.02807
2015-02-18 15:31:00	4.35195		2010-12-26	3.8		2014-12-26 21:59:00	-0.06167
2015-02-18 15:41:00	4.47919		2010-12-27	0.1		2014-12-26 22:09:00	-0.0768
2015-02-18 15:51:00	4.50743		2010-12-28	-1.7		2014-12-26 22:19:00	-0.15922
2015-02-18 16:01:00	4.55135		2010-12-29	-4.1		2014-12-26 22:29:00	-0.15249
2015-02-18 16:11:00	4.50273		2010-12-30	-6.2		2014-12-26 22:39:00	-0.11715
2015-02-18 16:21:00	4.61875		2010-12-31	-7.9		2014-12-26 22:49:00	-0.14912
2015-02-18 16:31:00	4.69704		2011-01-01	-0.8		2014-12-26 22:59:00	-0.22997
2015-02-18 16:41:00	4.82372		2011-01-02	5.2		2014-12-26 23:09:00	-0.33963
2015-02-18 16:51:00	4.76588		2011-01-03	0.7		2014-12-26 23:19:00	-0.32274
2015-02-18 17:01:00	4.79246		2011-01-04	-0.2		2014-12-26 23:29:00	-0.2873
2015-02-18 17:11:00	4.84091		2011-01-05	-2.4		2014-12-26 23:39:00	-0.39031
2015-02-18 17:21:00	4.68609		2011-01-06	-3.1		2014-12-26 23:49:00	-0.39538
2015-02-18 17:31:00	4.56703		2011-01-07	-2.4		2014-12-26 23:59:00	-0.35652
2015-02-18 17:41:00	4.60778		2011-01-08	-0.2		2014-12-27 00:09:00	-0.38017
2015-02-18 17:51:00	4.53881		2011-01-09	2.5		2014-12-27 00:19:00	-0.34638
2015-02-18 18:01:00	4.39596		2011-01-10	1.3		2014-12-27 00:29:00	-0.34469
2015-02-18 18:11:00	4.22608		2011-01-11	1.5		2014-12-27 00:39:00	-0.38355
2015-02-18 18:21:00	4.10315		2011-01-12	4		2014-12-27 00:49:00	-0.38355
2015-02-18 18:31:00	3.9579		2011-01-13	3.2		2014-12-27 00:59:00	-0.40552
2015-02-18 18:41:00	3.87252		2011-01-14	8.5		2014-12-27 01:09:00	-0.36665
2015-02-18 18:51:00	3.57289		2011-01-15	10.5		2014-12-27 01:19:00	-0.35821
2015-02-18 19:01:00	3.58718		2011-01-16	10.8		2014-12-27 01:29:00	-0.35821
2015-02-18 19:11:00	3.58083		2011-01-17	3.8		2014-12-27 01:39:00	-0.39707
2015-02-18 19:21:00	3.42022		2011-01-18	0.8		2014-12-27 01:49:00	-0.42412
2015-02-18 19:31:00	3.27361		2011-01-19	0.1		2014-12-27 01:59:00	-0.44781
2015-02-18 19:41:00	3.24648		2011-01-20	1.3		2014-12-27 02:09:00	-0.44442
2015-02-18 19:51:00	3.03071		2011-01-21	1.1		2014-12-27 02:19:00	-0.44442
2015-02-18 20:01:00	2.93941		2011-01-22	0.8		2014-12-27 02:29:00	-0.46811
2015-02-18 20:11:00	2.96024		2011-01-23	-0.2		2014-12-27 02:39:00	-0.49689
2015-02-18 20:21:00	2.53431		2011-01-24	0.6		2014-12-27 02:49:00	-0.51891
2015-02-18 20:31:00	2.21107		2011-01-25	-2.2		2014-12-27 02:59:00	-0.5206
2015-02-18 20:41:00	2.12352		2011-01-26	-5.4		2014-12-27 03:09:00	-0.53585
2015-02-18 20:51:00	1.85368		2011-01-27	-5.5		2014-12-27 03:19:00	-0.52568
2015-02-18 21:01:00	2.03424		2011-01-28	-4		2014-12-27 03:29:00	-0.5528
2015-02-18 21:11:00	2.12515		2011-01-29	-2.2		2014-12-27 03:39:00	-0.49012
2015-02-18 21:21:00	1.80479		2011-01-30	-3.7		2014-12-27 03:49:00	-0.5528
2015-02-18 21:31:00	1.68078		2011-01-31	-3.9		2014-12-27 03:59:00	-0.57314
2015-02-18 21:41:00	1.71017		2011-02-01	-6.5		2014-12-27 04:09:00	-0.61215
2015-02-18 21:51:00	1.5025		2011-02-02	-5.9		2014-12-27 04:19:00	-0.65459
2015-02-18 22:01:00	1.5598		2011-02-03	-4.4		2014-12-27 04:29:00	-0.75146
2015-02-18 22:11:00	1.32701		2011-02-04	-3.9		2014-12-27 04:39:00	-0.79741
2015-02-18 22:21:00	1.06696		2011-02-05	4		2014-12-27 04:49:00	-0.74806
2015-02-18 22:31:00	0.96793		2011-02-06	9.4		2014-12-27 04:59:00	-0.77018
2015-02-18 22:41:00	0.9861		2011-02-07	9.7		2014-12-27 05:09:00	-0.7957
2015-02-18 22:51:00	0.92166		2011-02-08	7.5		2014-12-27 05:19:00	-0.80932
2015-02-18 23:01:00	0.98114		2011-02-09	8.3		2014-12-27 05:29:00	-0.74466
2015-02-18 23:11:00	0.44201		2011-02-10	4		2014-12-27 05:39:00	-0.76167
2015-02-18 23:21:00	0.59345		2011-02-11	3.1		2014-12-27 05:49:00	-0.73786
2015-02-18 23:31:00	0.72462		2011-02-12	6.7		2014-12-27 05:59:00	-0.73786
2015-02-18 23:41:00	0.7412		2011-02-13	1.5		2014-12-27 06:09:00	-0.73615
2015-02-18 23:51:00	0.30522		2011-02-14	2.1		2014-12-27 06:19:00	-0.71065
2015-02-19 00:01:00	0.36698		2011-02-15	1		2014-12-27 06:29:00	-0.72595
2015-02-19 00:11:00	0.48532		2011-02-16	-0.9		2014-12-27 06:39:00	-0.68516
2015-02-19 00:21:00	-0.51552		2011-02-17	0		2014-12-27 06:49:00	-0.73956
2015-02-19 00:31:00	-0.58501		2011-02-18	1.2		2014-12-27 06:59:00	-0.72255
2015-02-19 00:41:00	-0.58162		2011-02-19	2.4		2014-12-27 07:09:00	-0.73275
2015-02-19 00:51:00	-0.28393		2011-02-20	1.3		2014-12-27 07:19:00	-0.72085
2015-02-19 01:01:00	-0.18448		2011-02-21	0.5		2014-12-27 07:29:00	-0.71745
2015-02-19 01:11:00	0.05921		2011-02-22	0.5		2014-12-27 07:39:00	-0.70385
2015-02-19 01:21:00	0.00887		2011-02-23	0.5		2014-12-27 07:49:00	-0.74806
2015-02-19 01:31:00	0.05417		2011-02-24	-1.5		2014-12-27 07:59:00	-0.794
2015-02-19 01:41:00	0.01391		2011-02-25	-2.7		2014-12-27 08:09:00	-0.77188
2015-02-19 01:51:00	-0.49012		2011-02-26	-2.4		2014-12-27 08:19:00	-0.75316
2015-02-19 02:01:00	-0.78549		2011-02-27	-1.7		2014-12-27 08:29:00	-0.77188
2015-02-19 02:11:00	-0.89112		2011-02-28	-2.4		2014-12-27 08:39:00	-0.83146
2015-02-19 02:21:00	-0.61215		2011-03-01	-2.4		2014-12-27 08:49:00	-0.85873
2015-02-19 02:31:00	-0.262		2011-03-02	-3.1		2014-12-27 08:59:00	-0.83487
2015-02-19 02:41:00	-0.16932		2011-03-03	-1.1		2014-12-27 09:09:00	-0.83657
2015-02-19 02:51:00	0.04747		2011-03-04	0.5		2014-12-27 09:19:00	-0.87066
2015-02-19 03:01:00	-0.10538		2011-03-05	-1.1		2014-12-27 09:29:00	-0.86554
2015-02-19 03:11:00	-0.17101		2011-03-06	0.7		2014-12-27 09:39:00	-0.97303
2015-02-19 03:21:00	-0.19964		2011-03-07	-0.6		2014-12-27 09:49:00	-0.97132
2015-02-19 03:31:00	-0.04151		2011-03-08	-2.6		2014-12-27 09:59:00	-1.04993
2015-02-19 03:41:00	0.00216		2011-03-09	-2.3		2014-12-27 10:09:00	-0.99182
2015-02-19 03:51:00	-0.02807		2011-03-10	-0.4		2014-12-27 10:19:00	-0.9662
2015-02-19 04:01:00	-0.06335		2011-03-11	6		2014-12-27 10:29:00	-0.96961
2015-02-19 04:11:00	0.08268		2011-03-12	7.3		2014-12-27 10:39:00	-0.9662
2015-02-19 04:21:00	0.06424		2011-03-13	8		2014-12-27 10:49:00	-0.9662
2015-02-19 04:31:00	0.02901		2011-03-14	9.1		2014-12-27 10:59:00	-1.00036
2015-02-19 04:41:00	0.16477		2011-03-15	10.9		2014-12-27 11:09:00	-1.01745
2015-02-19 04:51:00	0.1095		2011-03-16	11.3		2014-12-27 11:19:00	-1.07901
2015-02-19 05:01:00	0.17481		2011-03-17	11.4		2014-12-27 11:29:00	-1.00548
2015-02-19 05:11:00	-0.23671		2011-03-18	7.5		2014-12-27 11:39:00	-1.07045
2015-02-19 05:21:00	-0.17774		2011-03-19	7.4		2014-12-27 11:49:00	-1.02428
2015-02-19 05:31:00	-0.00624		2011-03-20	5.9		2014-12-27 11:59:00	-1.07217
2015-02-19 05:41:00	-0.25863		2011-03-21	5.3		2014-12-27 12:09:00	-1.06874
2015-02-19 05:51:00	-0.2148		2011-03-22	8.4		2014-12-27 12:19:00	-1.12694
2015-02-19 06:01:00	0.36365		2011-03-23	9.7		2014-12-27 12:29:00	-1.16634
2015-02-19 06:11:00	-0.0012		2011-03-24	11.7		2014-12-27 12:39:00	-1.16805
2015-02-19 06:21:00	-0.08352		2011-03-25	15.6		2014-12-27 12:49:00	-1.18005
2015-02-19 06:31:00	-0.4495		2011-03-26	13.5		2014-12-27 12:59:00	-1.18348
2015-02-19 06:41:00	-0.24514		2011-03-27	13.3		2014-12-27 13:09:00	-1.21092
2015-02-19 06:51:00	-0.38862		2011-03-28	9.6		2014-12-27 13:19:00	-1.21949
2015-02-19 07:01:00	-0.13903		2011-03-29	8.6		2014-12-27 13:29:00	-1.26754
2015-02-19 07:11:00	0.06088		2011-03-30	11.3		2014-12-27 13:39:00	-1.30705
2015-02-19 07:21:00	-0.19627		2011-03-31	11		2014-12-27 13:49:00	-1.32079
2015-02-19 07:31:00	-0.83487		2011-04-01	11.7		2014-12-27 13:59:00	-1.27613
2015-02-19 07:41:00	-1.00378		2011-04-02	12.6		2014-12-27 14:09:00	-1.3655
2015-02-19 07:51:00	-0.85191		2011-04-03	14.5		2014-12-27 14:19:00	-1.37926
2015-02-19 08:01:00	-1.03283		2011-04-04	12.3		2014-12-27 14:29:00	-1.35862
2015-02-19 08:11:00	-0.93376		2011-04-05	11.2		2014-12-27 14:39:00	-1.40679
2015-02-19 08:21:00	-0.75316		2011-04-06	13.8		2014-12-27 14:49:00	-1.38958
2015-02-19 08:31:00	-0.49858		2011-04-07	14.1		2014-12-27 14:59:00	-1.42745
2015-02-19 08:41:00	-0.45796		2011-04-08	17.6		2014-12-27 15:09:00	-1.46879
2015-02-19 08:51:00	-0.4292		2011-04-09	15.6		2014-12-27 15:19:00	-1.5395
2015-02-19 09:01:00	-0.18448		2011-04-10	12.1		2014-12-27 15:29:00	-1.53777
2015-02-19 09:11:00	-0.11547		2011-04-11	10.3		2014-12-27 15:39:00	-1.50844
2015-02-19 09:21:00	0.16142		2011-04-12	15.2		2014-12-27 15:49:00	-1.50672
2015-02-19 09:31:00	0.0223		2011-04-13	12.1		2014-12-27 15:59:00	-1.51362
2015-02-19 09:41:00	-0.1222		2011-04-14	10.2		2014-12-27 16:09:00	-1.58438
2015-02-19 09:51:00	-0.10538		2011-04-15	9.3		2014-12-27 16:19:00	-1.63621
2015-02-19 10:01:00	-0.27212		2011-04-16	9.7		2014-12-27 16:29:00	-1.67599
2015-02-19 10:11:00	-0.09361		2011-04-17	12.6		2014-12-27 16:39:00	-1.75562
2015-02-19 10:21:00	0.21497		2011-04-18	13.1		2014-12-27 16:49:00	-1.75562
2015-02-19 10:31:00	0.11452		2011-04-19	14.7		2014-12-27 16:59:00	-1.80762
2015-02-19 10:41:00	0.45201		2011-04-20	14.8		2014-12-27 17:09:00	-1.83538
2015-02-19 10:51:00	0.88362		2011-04-21	14.7		2014-12-27 17:19:00	-1.89267
2015-02-19 11:01:00	1.32372		2011-04-22	15.4		2014-12-27 17:29:00	-1.94132
2015-02-19 11:11:00	1.75587		2011-04-23	12.9		2014-12-27 17:39:00	-1.97785
2015-02-19 11:21:00	2.14137		2011-04-24	13.5		2014-12-27 17:49:00	-2.03007
2015-02-19 11:31:00	2.61327		2011-04-25	15.8		2014-12-27 17:59:00	-1.98481
2015-02-19 11:41:00	2.96024		2011-04-26	15.5		2014-12-27 18:09:00	-2.00221
2015-02-19 11:51:00	3.32623		2011-04-27	15.5		2014-12-27 18:19:00	-2.12594
2015-02-19 12:01:00	3.44409		2011-04-28	12.8		2014-12-27 18:29:00	-2.21324
2015-02-19 12:11:00	3.70621		2011-04-29	15.9		2014-12-27 18:39:00	-2.17132
2015-02-19 12:21:00	3.93103		2011-04-30	15.4		2014-12-27 18:49:00	-2.2587
2015-02-19 12:31:00	4.24655		2011-05-01	14.3		2014-12-27 18:59:00	-2.27445
2015-02-19 12:41:00	4.49017		2011-05-02	16.7		2014-12-27 19:09:00	-2.23947
2015-02-19 12:51:00	4.74868		2011-05-03	12		2014-12-27 19:19:00	-2.44444
2015-02-19 13:01:00	5.01413		2011-05-04	12.7		2014-12-27 19:29:00	-2.462
2015-02-19 13:11:00	5.30047		2011-05-05	14.3		2014-12-27 19:39:00	-2.65377
2015-02-19 13:21:00	5.57652		2011-05-06	11.3		2014-12-27 19:49:00	-2.57275
2015-02-19 13:31:00	5.75747		2011-05-07	12		2014-12-27 19:59:00	-2.56219
2015-02-19 13:41:00	5.94113		2011-05-08	11.8		2014-12-27 20:09:00	-2.66082
2015-02-19 13:51:00	6.12594		2011-05-09	13.1		2014-12-27 20:19:00	-2.7455
2015-02-19 14:01:00	6.18592		2011-05-10	17.2		2014-12-27 20:29:00	-2.82149
2015-02-19 14:11:00	6.29347		2011-05-11	15.8		2014-12-27 20:39:00	-2.85864
2015-02-19 14:21:00	6.37788		2011-05-12	16.6		2014-12-27 20:49:00	-2.76316
2015-02-19 14:31:00	6.53882		2011-05-13	17.8		2014-12-27 20:59:00	-2.74727
2015-02-19 14:41:00	6.73004		2011-05-14	18.7		2014-12-27 21:09:00	-2.67845
2015-02-19 14:51:00	6.94374		2011-05-15	19.4		2014-12-27 21:19:00	-2.66963
2015-02-19 15:01:00	7.05193		2011-05-16	18.1		2014-12-27 21:29:00	-2.63086
2015-02-19 15:11:00	7.26186		2011-05-17	16.1		2014-12-27 21:39:00	-2.57451
2015-02-19 15:21:00	7.4046		2011-05-18	19.9		2014-12-27 21:49:00	-2.53932
2015-02-19 15:31:00	7.43798		2011-05-19	19.6		2014-12-27 21:59:00	-2.50065
2015-02-19 15:41:00	7.49864		2011-05-20	20		2014-12-27 22:09:00	-2.42338
2015-02-19 15:51:00	7.54562		2011-05-21	20.5		2014-12-27 22:19:00	-2.37252
2015-02-19 16:01:00	7.56986		2011-05-22	20.6		2014-12-27 22:29:00	-2.43216
2015-02-19 16:11:00	7.53047		2011-05-23	22.2		2014-12-27 22:39:00	-2.47078
2015-02-19 16:21:00	7.55017		2011-05-24	21.7		2014-12-27 22:49:00	-2.58331
2015-02-19 16:31:00	7.55168		2011-05-25	21.1		2014-12-27 22:59:00	-2.59915
2015-02-19 16:41:00	7.56986		2011-05-26	19.6		2014-12-27 23:09:00	-2.64495
2015-02-19 16:51:00	7.48196		2011-05-27	22.7		2014-12-27 23:19:00	-2.66082
2015-02-19 17:01:00	7.40309		2011-05-28	21.4		2014-12-27 23:29:00	-2.67668
2015-02-19 17:11:00	7.3363		2011-05-29	21.3		2014-12-27 23:39:00	-2.60268
2015-02-19 17:21:00	7.22691		2011-05-30	22.3		2014-12-27 23:49:00	-2.58331
2015-02-19 17:31:00	7.12957		2011-05-31	20.7		2014-12-27 23:59:00	-2.51119
2015-02-19 17:41:00	7.05954		2011-06-01	20.5		2014-12-28 00:09:00	-2.55691
2015-02-19 17:51:00	6.91781		2011-06-02	22.1		2014-12-28 00:19:00	-2.51647
2015-02-19 18:01:00	6.74379		2011-06-03	23.1		2014-12-28 00:29:00	-2.54284
2015-02-19 18:11:00	6.59852		2011-06-04	22.9		2014-12-28 00:39:00	-2.56219
2015-02-19 18:21:00	6.50512		2011-06-05	23.5		2014-12-28 00:49:00	-2.57979
2015-02-19 18:31:00	6.38095		2011-06-06	23.1		2014-12-28 00:59:00	-2.41286
2015-02-19 18:41:00	6.35487		2011-06-07	24.8		2014-12-28 01:09:00	-2.42514
2015-02-19 18:51:00	6.1244		2011-06-08	26		2014-12-28 01:19:00	-2.51822
2015-02-19 19:01:00	6.07977		2011-06-09	21.6		2014-12-28 01:29:00	-2.55691
2015-02-19 19:11:00	5.96425		2011-06-10	18.9		2014-12-28 01:39:00	-2.51471
2015-02-19 19:21:00	5.95501		2011-06-11	20.1		2014-12-28 01:49:00	-2.61148
2015-02-19 19:31:00	5.89333		2011-06-12	21.8		2014-12-28 01:59:00	-2.6661
2015-02-19 19:41:00	5.67864		2011-06-13	22		2014-12-28 02:09:00	-2.70314
2015-02-19 19:51:00	5.55949		2011-06-14	21.7		2014-12-28 02:19:00	-2.6855
2015-02-19 20:01:00	5.39052		2011-06-15	23		2014-12-28 02:29:00	-2.69961
2015-02-19 20:11:00	5.41999		2011-06-16	23.1		2014-12-28 02:39:00	-2.74727
2015-02-19 20:21:00	5.33153		2011-06-17	24.5		2014-12-28 02:49:00	-2.772
2015-02-19 20:31:00	5.06089		2011-06-18	25.1		2014-12-28 02:59:00	-2.85864
2015-02-19 20:41:00	5.20721		2011-06-19	26.2		2014-12-28 03:09:00	-2.92771
2015-02-19 20:51:00	5.35792		2011-06-20	20.6		2014-12-28 03:19:00	-2.98622
2015-02-19 21:01:00	5.16987		2011-06-21	21.9		2014-12-28 03:29:00	-2.97735
2015-02-19 21:11:00	4.94551		2011-06-22	23.8		2014-12-28 03:39:00	-2.84094
[truncated: 114,783 more rows]

## Sheet: fig05.
Drobeta Date	T	Drobeta DJF	T	Drobeta MAM	T	Drobeta JJA	T	Drobeta SON	T
2012-01-01	13.6989	2011-12-01	0.5	2012-03-01	14.1	2012-06-01	25.7109	2012-09-01	15.4
2012-12-31	13.7	2012-02-28	0.5	2012-05-31	14.1	2012-08-30	25.7	2012-11-30	15.4
2013-01-01	13.4967	2012-12-01	2	2013-03-01	13.4	2013-06-01	24.3	2013-09-01	13.8
2013-12-31	13.5	2013-02-28	2	2013-05-31	13.4	2013-08-30	24.3	2013-11-30	13.8
2014-01-01	13.3	2013-12-01	2.4	2014-03-01	13.9	2014-06-01	22.7	2014-09-01	12.9
2014-12-31	13.3	2014-02-28	2.4	2014-05-31	13.9	2014-08-30	22.7	2014-11-30	12.9
2015-01-01	14.1	2014-12-01	2.9	2015-03-01	13.2	2015-06-01	24.9	2015-09-01	14.4
2015-12-31	14.1	2015-02-28	2.9	2015-05-31	13.2	2015-08-30	24.9	2015-11-30	14.4
2016-01-01	13.6	2015-12-01	4.6	2016-03-01	11	2016-06-01	20.9	2016-09-01	10.1
2016-12-31	13.6	2016-02-28	4.6	2016-05-31	11	2016-08-30	20.9	2016-11-30	10.1

## Sheet: fig06.
POM A Date	POM A Temp.		POM2 Date	POM2 Temp		POM Entr. Date	POM Entr. Temp.		Time Isverna Cave	Temp Isverna Cave
2014-12-13 06:29:00	7.12044		2014-08-18 02:04:00	7.32567		2015-02-08 10:05:00	4.99542		2014-09-24 11:13:00	10.084
2014-12-13 06:39:00	7.12196		2014-08-18 03:04:00	7.3287		2015-02-08 10:15:00	4.9923		2014-09-24 12:13:00	10.084
2014-12-13 06:49:00	7.12196		2014-08-18 04:04:00	7.32567		2015-02-08 10:25:00	4.99854		2014-09-24 13:13:00	10.0884
2014-12-13 06:59:00	7.12044		2014-08-18 05:04:00	7.31959		2015-02-08 10:35:00	4.99854		2014-09-24 14:13:00	10.084
2014-12-13 07:09:00	7.12044		2014-08-18 06:04:00	7.31807		2015-02-08 10:45:00	4.99854		2014-09-24 15:13:00	10.0854
2014-12-13 07:19:00	7.12044		2014-08-18 07:04:00	7.31655		2015-02-08 10:55:00	5.0001		2014-09-24 16:13:00	10.0825
2014-12-13 07:29:00	7.12044		2014-08-18 08:04:00	7.312		2015-02-08 11:05:00	5.00322		2014-09-24 17:13:00	10.0854
2014-12-13 07:39:00	7.11891		2014-08-18 09:04:00	7.31504		2015-02-08 11:15:00	5.00478		2014-09-24 18:13:00	10.0869
2014-12-13 07:49:00	7.11739		2014-08-18 10:04:00	7.31807		2015-02-08 11:25:00	5.00634		2014-09-24 19:13:00	10.0854
2014-12-13 07:59:00	7.12044		2014-08-18 11:04:00	7.31504		2015-02-08 11:35:00	5.00634		2014-09-24 20:13:00	10.0869
2014-12-13 08:09:00	7.12044		2014-08-18 12:04:00	7.312		2015-02-08 11:45:00	5.00322		2014-09-24 21:13:00	10.084
2014-12-13 08:19:00	7.12044		2014-08-18 13:04:00	7.30896		2015-02-08 11:55:00	5.0001		2014-09-24 22:13:00	10.0825
2014-12-13 08:29:00	7.11891		2014-08-18 14:04:00	7.31048		2015-02-08 12:05:00	4.99854		2014-09-24 23:13:00	10.084
2014-12-13 08:39:00	7.11891		2014-08-18 15:04:00	7.30744		2015-02-08 12:15:00	4.99386		2014-09-25 00:13:00	10.084
2014-12-13 08:49:00	7.11891		2014-08-18 16:04:00	7.31048		2015-02-08 12:25:00	4.98919		2014-09-25 01:13:00	10.084
2014-12-13 08:59:00	7.11891		2014-08-18 17:04:00	7.30896		2015-02-08 12:35:00	4.97827		2014-09-25 02:13:00	10.0825
2014-12-13 09:09:00	7.12044		2014-08-18 18:04:00	7.31048		2015-02-08 12:45:00	4.97515		2014-09-25 03:13:00	10.081
2014-12-13 09:19:00	7.12196		2014-08-18 19:04:00	7.30896		2015-02-08 12:55:00	4.97827		2014-09-25 04:13:00	10.081
2014-12-13 09:29:00	7.12196		2014-08-18 20:04:00	7.3044		2015-02-08 13:05:00	4.96891		2014-09-25 05:13:00	10.0795
2014-12-13 09:39:00	7.12044		2014-08-18 21:04:00	7.30744		2015-02-08 13:15:00	4.96735		2014-09-25 06:13:00	10.0751
2014-12-13 09:49:00	7.12044		2014-08-18 22:04:00	7.30592		2015-02-08 13:25:00	4.97827		2014-09-25 07:13:00	10.0765
2014-12-13 09:59:00	7.12044		2014-08-18 23:04:00	7.31048		2015-02-08 13:35:00	4.97983		2014-09-25 08:13:00	10.081
2014-12-13 10:09:00	7.12044		2014-08-19 00:04:00	7.30592		2015-02-08 13:45:00	4.97827		2014-09-25 09:13:00	10.081
2014-12-13 10:19:00	7.12044		2014-08-19 01:04:00	7.3044		2015-02-08 13:55:00	4.97671		2014-09-25 10:13:00	10.078
2014-12-13 10:29:00	7.11891		2014-08-19 02:04:00	7.30592		2015-02-08 14:05:00	4.97515		2014-09-25 11:13:00	10.0795
2014-12-13 10:39:00	7.11891		2014-08-19 03:04:00	7.3044		2015-02-08 14:15:00	4.96891		2014-09-25 12:13:00	10.0736
2014-12-13 10:49:00	7.11739		2014-08-19 04:04:00	7.30288		2015-02-08 14:25:00	4.97047		2014-09-25 13:13:00	10.0765
2014-12-13 10:59:00	7.11891		2014-08-19 05:04:00	7.30744		2015-02-08 14:35:00	4.97359		2014-09-25 14:13:00	10.0692
2014-12-13 11:09:00	7.11891		2014-08-19 06:04:00	7.30288		2015-02-08 14:45:00	4.97359		2014-09-25 15:13:00	10.0706
2014-12-13 11:19:00	7.11739		2014-08-19 07:04:00	7.30137		2015-02-08 14:55:00	4.97047		2014-09-25 16:13:00	10.0736
2014-12-13 11:29:00	7.11587		2014-08-19 08:04:00	7.3044		2015-02-08 15:05:00	4.97047		2014-09-25 17:13:00	10.0736
2014-12-13 11:39:00	7.11587		2014-08-19 09:04:00	7.30288		2015-02-08 15:15:00	4.96891		2014-09-25 18:13:00	10.0765
2014-12-13 11:49:00	7.11587		2014-08-19 10:04:00	7.29985		2015-02-08 15:25:00	4.96267		2014-09-25 19:13:00	10.0751
2014-12-13 11:59:00	7.11587		2014-08-19 11:04:00	7.3044		2015-02-08 15:35:00	4.95955		2014-09-25 20:13:00	10.078
2014-12-13 12:09:00	7.11587		2014-08-19 12:04:00	7.30137		2015-02-08 15:45:00	4.95955		2014-09-25 21:13:00	10.0721
2014-12-13 12:19:00	7.11435		2014-08-19 13:04:00	7.30288		2015-02-08 15:55:00	4.95487		2014-09-25 22:13:00	10.0736
2014-12-13 12:29:00	7.11435		2014-08-19 14:04:00	7.30137		2015-02-08 16:05:00	4.94707		2014-09-25 23:13:00	10.0765
2014-12-13 12:39:00	7.11435		2014-08-19 15:04:00	7.29985		2015-02-08 16:15:00	4.94395		2014-09-26 00:13:00	10.0721
2014-12-13 12:49:00	7.11435		2014-08-19 16:04:00	7.29985		2015-02-08 16:25:00	4.94083		2014-09-26 01:13:00	10.0706
2014-12-13 12:59:00	7.11435		2014-08-19 17:04:00	7.30288		2015-02-08 16:35:00	4.94083		2014-09-26 02:13:00	10.0721
2014-12-13 13:09:00	7.11435		2014-08-19 18:04:00	7.3044		2015-02-08 16:45:00	4.93927		2014-09-26 03:13:00	10.0706
2014-12-13 13:19:00	7.11283		2014-08-19 19:04:00	7.30137		2015-02-08 16:55:00	4.94083		2014-09-26 04:13:00	10.0736
2014-12-13 13:29:00	7.11283		2014-08-19 20:04:00	7.30137		2015-02-08 17:05:00	4.94083		2014-09-26 05:13:00	10.0721
2014-12-13 13:39:00	7.11283		2014-08-19 21:04:00	7.30288		2015-02-08 17:15:00	4.94083		2014-09-26 06:13:00	10.0736
2014-12-13 13:49:00	7.11435		2014-08-19 22:04:00	7.30288		2015-02-08 17:25:00	4.93615		2014-09-26 07:13:00	10.0721
2014-12-13 13:59:00	7.11283		2014-08-19 23:04:00	7.3044		2015-02-08 17:35:00	4.93147		2014-09-26 08:13:00	10.0751
2014-12-13 14:09:00	7.11283		2014-08-20 00:04:00	7.30137		2015-02-08 17:45:00	4.92679		2014-09-26 09:13:00	10.0736
2014-12-13 14:19:00	7.11283		2014-08-20 01:04:00	7.30137		2015-02-08 17:55:00	4.92522		2014-09-26 10:13:00	10.0706
2014-12-13 14:29:00	7.12348		2014-08-20 02:04:00	7.30137		2015-02-08 18:05:00	4.9221		2014-09-26 11:13:00	10.0706
2014-12-13 14:39:00	7.12044		2014-08-20 03:04:00	7.29985		2015-02-08 18:15:00	4.91742		2014-09-26 12:13:00	10.0721
2014-12-13 14:49:00	7.11891		2014-08-20 04:04:00	7.29985		2015-02-08 18:25:00	4.91742		2014-09-26 13:13:00	10.0721
2014-12-13 14:59:00	7.11587		2014-08-20 05:04:00	7.29833		2015-02-08 18:35:00	4.91118		2014-09-26 14:13:00	10.0692
2014-12-13 15:09:00	7.11435		2014-08-20 06:04:00	7.30137		2015-02-08 18:45:00	4.91274		2014-09-26 15:13:00	10.0721
2014-12-13 15:19:00	7.11435		2014-08-20 07:04:00	7.29681		2015-02-08 18:55:00	4.9143		2014-09-26 16:13:00	10.0721
2014-12-13 15:29:00	7.12652		2014-08-20 08:04:00	7.30137		2015-02-08 19:05:00	4.9143		2014-09-26 17:13:00	10.0706
2014-12-13 15:39:00	7.125		2014-08-20 09:04:00	7.29985		2015-02-08 19:15:00	4.91742		2014-09-26 18:13:00	10.0721
2014-12-13 15:49:00	7.12196		2014-08-20 10:04:00	7.30137		2015-02-08 19:25:00	4.91742		2014-09-26 19:13:00	10.0706
2014-12-13 15:59:00	7.12044		2014-08-20 11:04:00	7.29833		2015-02-08 19:35:00	4.91586		2014-09-26 20:13:00	10.0692
2014-12-13 16:09:00	7.11739		2014-08-20 12:04:00	7.30288		2015-02-08 19:45:00	4.91742		2014-09-26 21:13:00	10.0736
2014-12-13 16:19:00	7.11739		2014-08-20 13:04:00	7.29985		2015-02-08 19:55:00	4.91274		2014-09-26 22:13:00	10.0751
2014-12-13 16:29:00	7.11739		2014-08-20 14:04:00	7.29681		2015-02-08 20:05:00	4.91586		2014-09-26 23:13:00	10.0721
2014-12-13 16:39:00	7.11435		2014-08-20 15:04:00	7.30137		2015-02-08 20:15:00	4.9143		2014-09-27 00:13:00	10.0721
2014-12-13 16:49:00	7.11435		2014-08-20 16:04:00	7.29833		2015-02-08 20:25:00	4.9143		2014-09-27 01:13:00	10.0677
2014-12-13 16:59:00	7.11283		2014-08-20 17:04:00	7.29225		2015-02-08 20:35:00	4.91274		2014-09-27 02:13:00	10.0706
2014-12-13 17:09:00	7.11283		2014-08-20 18:04:00	7.29833		2015-02-08 20:45:00	4.91274		2014-09-27 03:13:00	10.0692
2014-12-13 17:19:00	7.11283		2014-08-20 19:04:00	7.29985		2015-02-08 20:55:00	4.9143		2014-09-27 04:13:00	10.0662
2014-12-13 17:29:00	7.11283		2014-08-20 20:04:00	7.30137		2015-02-08 21:05:00	4.91274		2014-09-27 05:13:00	10.0706
2014-12-13 17:39:00	7.11435		2014-08-20 21:04:00	7.30137		2015-02-08 21:15:00	4.90962		2014-09-27 06:13:00	10.0721
2014-12-13 17:49:00	7.11283		2014-08-20 22:04:00	7.29985		2015-02-08 21:25:00	4.88932		2014-09-27 07:13:00	10.0751
2014-12-13 17:59:00	7.11283		2014-08-20 23:04:00	7.30288		2015-02-08 21:35:00	4.88932		2014-09-27 08:13:00	10.0692
2014-12-13 18:09:00	7.11283		2014-08-21 00:04:00	7.3044		2015-02-08 21:45:00	4.88308		2014-09-27 09:13:00	10.0677
2014-12-13 18:19:00	7.11283		2014-08-21 01:04:00	7.30288		2015-02-08 21:55:00	4.88932		2014-09-27 10:13:00	10.0677
2014-12-13 18:29:00	7.11283		2014-08-21 02:04:00	7.30288		2015-02-08 22:05:00	4.89557		2014-09-27 11:13:00	10.0677
2014-12-13 18:39:00	7.1113		2014-08-21 03:04:00	7.30288		2015-02-08 22:15:00	4.89244		2014-09-27 12:13:00	10.0721
2014-12-13 18:49:00	7.1113		2014-08-21 04:04:00	7.29985		2015-02-08 22:25:00	4.88464		2014-09-27 13:13:00	10.0706
2014-12-13 18:59:00	7.11283		2014-08-21 05:04:00	7.30137		2015-02-08 22:35:00	4.89244		2014-09-27 14:13:00	10.0692
2014-12-13 19:09:00	7.11283		2014-08-21 06:04:00	7.29529		2015-02-08 22:45:00	4.88932		2014-09-27 15:13:00	10.0692
2014-12-13 19:19:00	7.11283		2014-08-21 07:04:00	7.29529		2015-02-08 22:55:00	4.8862		2014-09-27 16:13:00	10.0692
2014-12-13 19:29:00	7.11283		2014-08-21 08:04:00	7.30137		2015-02-08 23:05:00	4.88464		2014-09-27 17:13:00	10.0692
2014-12-13 19:39:00	7.11283		2014-08-21 09:04:00	7.29833		2015-02-08 23:15:00	4.88308		2014-09-27 18:13:00	10.0677
2014-12-13 19:49:00	7.1113		2014-08-21 10:04:00	7.30288		2015-02-08 23:25:00	4.88151		2014-09-27 19:13:00	10.0677
2014-12-13 19:59:00	7.1113		2014-08-21 11:04:00	7.29985		2015-02-08 23:35:00	4.87683		2014-09-27 20:13:00	10.0692
2014-12-13 20:09:00	7.1113		2014-08-21 12:04:00	7.29833		2015-02-08 23:45:00	4.87995		2014-09-27 21:13:00	10.0706
2014-12-13 20:19:00	7.1113		2014-08-21 13:04:00	7.29833		2015-02-08 23:55:00	4.87839		2014-09-27 22:13:00	10.0662
2014-12-13 20:29:00	7.1113		2014-08-21 14:04:00	7.29833		2015-02-09 00:05:00	4.87527		2014-09-27 23:13:00	10.0692
2014-12-13 20:39:00	7.1113		2014-08-21 15:04:00	7.29833		2015-02-09 00:15:00	4.87371		2014-09-28 00:13:00	10.0706
2014-12-13 20:49:00	7.1113		2014-08-21 16:04:00	7.30137		2015-02-09 00:25:00	4.87371		2014-09-28 01:13:00	10.0647
2014-12-13 20:59:00	7.1113		2014-08-21 17:04:00	7.29377		2015-02-09 00:35:00	4.87058		2014-09-28 02:13:00	10.0706
2014-12-13 21:09:00	7.1113		2014-08-21 18:04:00	7.29529		2015-02-09 00:45:00	4.86746		2014-09-28 03:13:00	10.0677
2014-12-13 21:19:00	7.1113		2014-08-21 19:04:00	7.29681		2015-02-09 00:55:00	4.86434		2014-09-28 04:13:00	10.0647
2014-12-13 21:29:00	7.1113		2014-08-21 20:04:00	7.29985		2015-02-09 01:05:00	4.86121		2014-09-28 05:13:00	10.0677
2014-12-13 21:39:00	7.1113		2014-08-21 21:04:00	7.29833		2015-02-09 01:15:00	4.86277		2014-09-28 06:13:00	10.0662
2014-12-13 21:49:00	7.1113		2014-08-21 22:04:00	7.29529		2015-02-09 01:25:00	4.86277		2014-09-28 07:13:00	10.0647
2014-12-13 21:59:00	7.10978		2014-08-21 23:04:00	7.29833		2015-02-09 01:35:00	4.86121		2014-09-28 08:13:00	10.0662
2014-12-13 22:09:00	7.10978		2014-08-22 00:04:00	7.30137		2015-02-09 01:45:00	4.86277		2014-09-28 09:13:00	10.0647
2014-12-13 22:19:00	7.10978		2014-08-22 01:04:00	7.29985		2015-02-09 01:55:00	4.85965		2014-09-28 10:13:00	10.0647
2014-12-13 22:29:00	7.10978		2014-08-22 02:04:00	7.30288		2015-02-09 02:05:00	4.85965		2014-09-28 11:13:00	10.0706
2014-12-13 22:39:00	7.10978		2014-08-22 03:04:00	7.29985		2015-02-09 02:15:00	4.85809		2014-09-28 12:13:00	10.0677
2014-12-13 22:49:00	7.10978		2014-08-22 04:04:00	7.29833		2015-02-09 02:25:00	4.85497		2014-09-28 13:13:00	10.0706
2014-12-13 22:59:00	7.10978		2014-08-22 05:04:00	7.29985		2015-02-09 02:35:00	4.85653		2014-09-28 14:13:00	10.0677
2014-12-13 23:09:00	7.10978		2014-08-22 06:04:00	7.29833		2015-02-09 02:45:00	4.85809		2014-09-28 15:13:00	10.0692
2014-12-13 23:19:00	7.10978		2014-08-22 07:04:00	7.29985		2015-02-09 02:55:00	4.85965		2014-09-28 16:13:00	10.0662
2014-12-13 23:29:00	7.10826		2014-08-22 08:04:00	7.29833		2015-02-09 03:05:00	4.85809		2014-09-28 17:13:00	10.0677
2014-12-13 23:39:00	7.10978		2014-08-22 09:04:00	7.29833		2015-02-09 03:15:00	4.85497		2014-09-28 18:13:00	10.0706
2014-12-13 23:49:00	7.10978		2014-08-22 10:04:00	7.30137		2015-02-09 03:25:00	4.85497		2014-09-28 19:13:00	10.0692
2014-12-13 23:59:00	7.10978		2014-08-22 11:04:00	7.30137		2015-02-09 03:35:00	4.85184		2014-09-28 20:13:00	10.0677
2014-12-14 00:09:00	7.10978		2014-08-22 12:04:00	7.29985		2015-02-09 03:45:00	4.84559		2014-09-28 21:13:00	10.0662
2014-12-14 00:19:00	7.10978		2014-08-22 13:04:00	7.29833		2015-02-09 03:55:00	4.84559		2014-09-28 22:13:00	10.0647
2014-12-14 00:29:00	7.10978		2014-08-22 14:04:00	7.29985		2015-02-09 04:05:00	4.84559		2014-09-28 23:13:00	10.0692
2014-12-14 00:39:00	7.10826		2014-08-22 15:04:00	7.29833		2015-02-09 04:15:00	4.84559		2014-09-29 00:13:00	10.0677
2014-12-14 00:49:00	7.10826		2014-08-22 16:04:00	7.29985		2015-02-09 04:25:00	4.84247		2014-09-29 01:13:00	10.0692
2014-12-14 00:59:00	7.10826		2014-08-22 17:04:00	7.29681		2015-02-09 04:35:00	4.84715		2014-09-29 02:13:00	10.0662
2014-12-14 01:09:00	7.10826		2014-08-22 18:04:00	7.29529		2015-02-09 04:45:00	4.84247		2014-09-29 03:13:00	10.0662
2014-12-14 01:19:00	7.10826		2014-08-22 19:04:00	7.29985		2015-02-09 04:55:00	4.84247		2014-09-29 04:13:00	10.0662
2014-12-14 01:29:00	7.1113		2014-08-22 20:04:00	7.29985		2015-02-09 05:05:00	4.84247		2014-09-29 05:13:00	10.0677
2014-12-14 01:39:00	7.10826		2014-08-22 21:04:00	7.29985		2015-02-09 05:15:00	4.83778		2014-09-29 06:13:00	10.0677
2014-12-14 01:49:00	7.10826		2014-08-22 22:04:00	7.29985		2015-02-09 05:25:00	4.83622		2014-09-29 07:13:00	10.0677
2014-12-14 01:59:00	7.10674		2014-08-22 23:04:00	7.29985		2015-02-09 05:35:00	4.83309		2014-09-29 08:13:00	10.0632
2014-12-14 02:09:00	7.10826		2014-08-23 00:04:00	7.3044		2015-02-09 05:45:00	4.83309		2014-09-29 09:13:00	10.0647
2014-12-14 02:19:00	7.10826		2014-08-23 01:04:00	7.30288		2015-02-09 05:55:00	4.82997		2014-09-29 10:13:00	10.0602
2014-12-14 02:29:00	7.10826		2014-08-23 02:04:00	7.30288		2015-02-09 06:05:00	4.82841		2014-09-29 11:13:00	10.0647
2014-12-14 02:39:00	7.10826		2014-08-23 03:04:00	7.30288		2015-02-09 06:15:00	4.82528		2014-09-29 12:13:00	10.0662
2014-12-14 02:49:00	7.10826		2014-08-23 04:04:00	7.3044		2015-02-09 06:25:00	4.82372		2014-09-29 13:13:00	10.0617
2014-12-14 02:59:00	7.10826		2014-08-23 05:04:00	7.29985		2015-02-09 06:35:00	4.82059		2014-09-29 14:13:00	10.0647
2014-12-14 03:09:00	7.10826		2014-08-23 06:04:00	7.29377		2015-02-09 06:45:00	4.81747		2014-09-29 15:13:00	10.0647
2014-12-14 03:19:00	7.10978		2014-08-23 07:04:00	7.30288		2015-02-09 06:55:00	4.81747		2014-09-29 16:13:00	10.0647
2014-12-14 03:29:00	7.10978		2014-08-23 08:04:00	7.30137		2015-02-09 07:05:00	4.81903		2014-09-29 17:13:00	10.0647
2014-12-14 03:39:00	7.10978		2014-08-23 09:04:00	7.30137		2015-02-09 07:15:00	4.81747		2014-09-29 18:13:00	10.0602
2014-12-14 03:49:00	7.10978		2014-08-23 10:04:00	7.30137		2015-02-09 07:25:00	4.81434		2014-09-29 19:13:00	10.0632
2014-12-14 03:59:00	7.10978		2014-08-23 11:04:00	7.30137		2015-02-09 07:35:00	4.80965		2014-09-29 20:13:00	10.0647
2014-12-14 04:09:00	7.10978		2014-08-23 12:04:00	7.29985		2015-02-09 07:45:00	4.80965		2014-09-29 21:13:00	10.0602
2014-12-14 04:19:00	7.10978		2014-08-23 13:04:00	7.30137		2015-02-09 07:55:00	4.80496		2014-09-29 22:13:00	10.0632
2014-12-14 04:29:00	7.10826		2014-08-23 14:04:00	7.30137		2015-02-09 08:05:00	4.80496		2014-09-29 23:13:00	10.0632
2014-12-14 04:39:00	7.10674		2014-08-23 15:04:00	7.29833		2015-02-09 08:15:00	4.8034		2014-09-30 00:13:00	10.0617
2014-12-14 04:49:00	7.10826		2014-08-23 16:04:00	7.29377		2015-02-09 08:25:00	4.79871		2014-09-30 01:13:00	10.0647
2014-12-14 04:59:00	7.10826		2014-08-23 17:04:00	7.29529		2015-02-09 08:35:00	4.79559		2014-09-30 02:13:00	10.0602
2014-12-14 05:09:00	7.10826		2014-08-23 18:04:00	7.29985		2015-02-09 08:45:00	4.79246		2014-09-30 03:13:00	10.0588
2014-12-14 05:19:00	7.10826		2014-08-23 19:04:00	7.29681		2015-02-09 08:55:00	4.79246		2014-09-30 04:13:00	10.0573
2014-12-14 05:29:00	7.10826		2014-08-23 20:04:00	7.29681		2015-02-09 09:05:00	4.7909		2014-09-30 05:13:00	10.0602
2014-12-14 05:39:00	7.10674		2014-08-23 21:04:00	7.29681		2015-02-09 09:15:00	4.78777		2014-09-30 06:13:00	10.0632
2014-12-14 05:49:00	7.10674		2014-08-23 22:04:00	7.29529		2015-02-09 09:25:00	4.78777		2014-09-30 07:13:00	10.0632
2014-12-14 05:59:00	7.10826		2014-08-23 23:04:00	7.29377		2015-02-09 09:35:00	4.78777		2014-09-30 08:13:00	10.0632
2014-12-14 06:09:00	7.10826		2014-08-24 00:04:00	7.30592		2015-02-09 09:45:00	4.78777		2014-09-30 09:13:00	10.0647
2014-12-14 06:19:00	7.10826		2014-08-24 01:04:00	7.29681		2015-02-09 09:55:00	4.78777		2014-09-30 10:13:00	10.0647
2014-12-14 06:29:00	7.10826		2014-08-24 02:04:00	7.29681		2015-02-09 10:05:00	4.78621		2014-09-30 11:13:00	10.0617
2014-12-14 06:39:00	7.10826		2014-08-24 03:04:00	7.29833		2015-02-09 10:15:00	4.78621		2014-09-30 12:13:00	10.0588
2014-12-14 06:49:00	7.10826		2014-08-24 04:04:00	7.29681		2015-02-09 10:25:00	4.78308		2014-09-30 13:13:00	10.0647
2014-12-14 06:59:00	7.10826		2014-08-24 05:04:00	7.29985		2015-02-09 10:35:00	4.78464		2014-09-30 14:13:00	10.0602
2014-12-14 07:09:00	7.10826		2014-08-24 06:04:00	7.29985		2015-02-09 10:45:00	4.77839		2014-09-30 15:13:00	10.0602
2014-12-14 07:19:00	7.10674		2014-08-24 07:04:00	7.29985		2015-02-09 10:55:00	4.77683		2014-09-30 16:13:00	10.0617
2014-12-14 07:29:00	7.10826		2014-08-24 08:04:00	7.29833		2015-02-09 11:05:00	4.7737		2014-09-30 17:13:00	10.0632
2014-12-14 07:39:00	7.10826		2014-08-24 09:04:00	7.30137		2015-02-09 11:15:00	4.77214		2014-09-30 18:13:00	10.0662
2014-12-14 07:49:00	7.10826		2014-08-24 10:04:00	7.29985		2015-02-09 11:25:00	4.77526		2014-09-30 19:13:00	10.0692
2014-12-14 07:59:00	7.10826		2014-08-24 11:04:00	7.29833		2015-02-09 11:35:00	4.77683		2014-09-30 20:13:00	10.0647
2014-12-14 08:09:00	7.10978		2014-08-24 12:04:00	7.29985		2015-02-09 11:45:00	4.77995		2014-09-30 21:13:00	10.0602
2014-12-14 08:19:00	7.10978		2014-08-24 13:04:00	7.29985		2015-02-09 11:55:00	4.77995		2014-09-30 22:13:00	10.0617
2014-12-14 08:29:00	7.10978		2014-08-24 14:04:00	7.29833		2015-02-09 12:05:00	4.78621		2014-09-30 23:13:00	10.0617
2014-12-14 08:39:00	7.10978		2014-08-24 15:04:00	7.29833		2015-02-09 12:15:00	4.7909		2014-10-01 00:13:00	10.0647
2014-12-14 08:49:00	7.10978		2014-08-24 16:04:00	7.30137		2015-02-09 12:25:00	4.78933		2014-10-01 01:13:00	10.0632
2014-12-14 08:59:00	7.10978		2014-08-24 17:04:00	7.29985		2015-02-09 12:35:00	4.78933		2014-10-01 02:13:00	10.0602
2014-12-14 09:09:00	7.10978		2014-08-24 18:04:00	7.29833		2015-02-09 12:45:00	4.7909		2014-10-01 03:13:00	10.0617
2014-12-14 09:19:00	7.1113		2014-08-24 19:04:00	7.29833		2015-02-09 12:55:00	4.78933		2014-10-01 04:13:00	10.0617
2014-12-14 09:29:00	7.10978		2014-08-24 20:04:00	7.29681		2015-02-09 13:05:00	4.7909		2014-10-01 05:13:00	10.0617
2014-12-14 09:39:00	7.10978		2014-08-24 21:04:00	7.30137		2015-02-09 13:15:00	4.79559		2014-10-01 06:13:00	10.0617
2014-12-14 09:49:00	7.10978		2014-08-24 22:04:00	7.30137		2015-02-09 13:25:00	4.79871		2014-10-01 07:13:00	10.0602
2014-12-14 09:59:00	7.10978		2014-08-24 23:04:00	7.30288		2015-02-09 13:35:00	4.79871		2014-10-01 08:13:00	10.0632
2014-12-14 10:09:00	7.10978		2014-08-25 00:04:00	7.29833		2015-02-09 13:45:00	4.80028		2014-10-01 09:13:00	10.0617
2014-12-14 10:19:00	7.10978		2014-08-25 01:04:00	7.30592		2015-02-09 13:55:00	4.80184		2014-10-01 10:13:00	10.0662
2014-12-14 10:29:00	7.10978		2014-08-25 02:04:00	7.30592		2015-02-09 14:05:00	4.80028		2014-10-01 11:13:00	10.0647
2014-12-14 10:39:00	7.10978		2014-08-25 03:04:00	7.30288		2015-02-09 14:15:00	4.80028		2014-10-01 12:13:00	10.0677
2014-12-14 10:49:00	7.10978		2014-08-25 04:04:00	7.30288		2015-02-09 14:25:00	4.79871		2014-10-01 13:13:00	10.0706
2014-12-14 10:59:00	7.10978		2014-08-25 05:04:00	7.3044		2015-02-09 14:35:00	4.79871		2014-10-01 14:13:00	10.0736
2014-12-14 11:09:00	7.10826		2014-08-25 06:04:00	7.30744		2015-02-09 14:45:00	4.79871		2014-10-01 15:13:00	10.0736
2014-12-14 11:19:00	7.10826		2014-08-25 07:04:00	7.30744		2015-02-09 14:55:00	4.79559		2014-10-01 16:13:00	10.0706
2014-12-14 11:29:00	7.10826		2014-08-25 08:04:00	7.30137		2015-02-09 15:05:00	4.79402		2014-10-01 17:13:00	10.0662
2014-12-14 11:39:00	7.10826		2014-08-25 09:04:00	7.30744		2015-02-09 15:15:00	4.79559		2014-10-01 18:13:00	10.0692
2014-12-14 11:49:00	7.10978		2014-08-25 10:04:00	7.31048		2015-02-09 15:25:00	4.79559		2014-10-01 19:13:00	10.0632
2014-12-14 11:59:00	7.10826		2014-08-25 11:04:00	7.31048		2015-02-09 15:35:00	4.79402		2014-10-01 20:13:00	10.0647
2014-12-14 12:09:00	7.10826		2014-08-25 12:04:00	7.30744		2015-02-09 15:45:00	4.7909		2014-10-01 21:13:00	10.0632
2014-12-14 12:19:00	7.10826		2014-08-25 13:04:00	7.30744		2015-02-09 15:55:00	4.77995		2014-10-01 22:13:00	10.0647
2014-12-14 12:29:00	7.10826		2014-08-25 14:04:00	7.30744		2015-02-09 16:05:00	4.76901		2014-10-01 23:13:00	10.0677
2014-12-14 12:39:00	7.10826		2014-08-25 15:04:00	7.30744		2015-02-09 16:15:00	4.76588		2014-10-02 00:13:00	10.0647
2014-12-14 12:49:00	7.10826		2014-08-25 16:04:00	7.30288		2015-02-09 16:25:00	4.75962		2014-10-02 01:13:00	10.0647
2014-12-14 12:59:00	7.10674		2014-08-25 17:04:00	7.3044		2015-02-09 16:35:00	4.74868		2014-10-02 02:13:00	10.0632
2014-12-14 13:09:00	7.10674		2014-08-25 18:04:00	7.30592		2015-02-09 16:45:00	4.74555		2014-10-02 03:13:00	10.0632
2014-12-14 13:19:00	7.10674		2014-08-25 19:04:00	7.3044		2015-02-09 16:55:00	4.73616		2014-10-02 04:13:00	10.0662
2014-12-14 13:29:00	7.10826		2014-08-25 20:04:00	7.30288		2015-02-09 17:05:00	4.73147		2014-10-02 05:13:00	10.0602
2014-12-14 13:39:00	7.10674		2014-08-25 21:04:00	7.3044		2015-02-09 17:15:00	4.72521		2014-10-02 06:13:00	10.0588
2014-12-14 13:49:00	7.10826		2014-08-25 22:04:00	7.30744		2015-02-09 17:25:00	4.72365		2014-10-02 07:13:00	10.0632
2014-12-14 13:59:00	7.10826		2014-08-25 23:04:00	7.29985		2015-02-09 17:35:00	4.72052		2014-10-02 08:13:00	10.0602
2014-12-14 14:09:00	7.10826		2014-08-26 00:04:00	7.3044		2015-02-09 17:45:00	4.71426		2014-10-02 09:13:00	10.0632
2014-12-14 14:19:00	7.10826		2014-08-26 01:04:00	7.29985		2015-02-09 17:55:00	4.7033		2014-10-02 10:13:00	10.0662
2014-12-14 14:29:00	7.10826		2014-08-26 02:04:00	7.29681		2015-02-09 18:05:00	4.70643		2014-10-02 11:13:00	10.0588
2014-12-14 14:39:00	7.10826		2014-08-26 03:04:00	7.29681		2015-02-09 18:15:00	4.70174		2014-10-02 12:13:00	10.0677
2014-12-14 14:49:00	7.10826		2014-08-26 04:04:00	7.29985		2015-02-09 18:25:00	4.69704		2014-10-02 13:13:00	10.0632
2014-12-14 14:59:00	7.10826		2014-08-26 05:04:00	7.29681		2015-02-09 18:35:00	4.7033		2014-10-02 14:13:00	10.0588
2014-12-14 15:09:00	7.10826		2014-08-26 06:04:00	7.29529		2015-02-09 18:45:00	4.69861		2014-10-02 15:13:00	10.0617
2014-12-14 15:19:00	7.1113		2014-08-26 07:04:00	7.29681		2015-02-09 18:55:00	4.69861		2014-10-02 16:13:00	10.0632
2014-12-14 15:29:00	7.10826		2014-08-26 08:04:00	7.29985		2015-02-09 19:05:00	4.69235		2014-10-02 17:13:00	10.0602
2014-12-14 15:39:00	7.10826		2014-08-26 09:04:00	7.29681		2015-02-09 19:15:00	4.69078		2014-10-02 18:13:00	10.0632
2014-12-14 15:49:00	7.10826		2014-08-26 10:04:00	7.29681		2015-02-09 19:25:00	4.69235		2014-10-02 19:13:00	10.0632
2014-12-14 15:59:00	7.10826		2014-08-26 11:04:00	7.3044		2015-02-09 19:35:00	4.69078		2014-10-02 20:13:00	10.0588
2014-12-14 16:09:00	7.10826		2014-08-26 12:04:00	7.29985		2015-02-09 19:45:00	4.68765		2014-10-02 21:13:00	10.0632
2014-12-14 16:19:00	7.10826		2014-08-26 13:04:00	7.29681		2015-02-09 19:55:00	4.67983		2014-10-02 22:13:00	10.0647
2014-12-14 16:29:00	7.10826		2014-08-26 14:04:00	7.29529		2015-02-09 20:05:00	4.67043		2014-10-02 23:13:00	10.0632
2014-12-14 16:39:00	7.10826		2014-08-26 15:04:00	7.29833		2015-02-09 20:15:00	4.66574		2014-10-03 00:13:00	10.0602
2014-12-14 16:49:00	7.10826		2014-08-26 16:04:00	7.30137		2015-02-09 20:25:00	4.6626		2014-10-03 01:13:00	10.0617
2014-12-14 16:59:00	7.10826		2014-08-26 17:04:00	7.29985		2015-02-09 20:35:00	4.66104		2014-10-03 02:13:00	10.0647
2014-12-14 17:09:00	7.10674		2014-08-26 18:04:00	7.30137		2015-02-09 20:45:00	4.65634		2014-10-03 03:13:00	10.0602
2014-12-14 17:19:00	7.10217		2014-08-26 19:04:00	7.29681		2015-02-09 20:55:00	4.65008		2014-10-03 04:13:00	10.0573
2014-12-14 17:29:00	7.09913		2014-08-26 20:04:00	7.30288		2015-02-09 21:05:00	4.64694		2014-10-03 05:13:00	10.0647
2014-12-14 17:39:00	7.0976		2014-08-26 21:04:00	7.30137		2015-02-09 21:15:00	4.64225		2014-10-03 06:13:00	10.0602
2014-12-14 17:49:00	7.09304		2014-08-26 22:04:00	7.29985		2015-02-09 21:25:00	4.64225		2014-10-03 07:13:00	10.0632
2014-12-14 17:59:00	7.09456		2014-08-26 23:04:00	7.29985		2015-02-09 21:35:00	4.64068		2014-10-03 08:13:00	10.0617
2014-12-14 18:09:00	7.09152		2014-08-27 00:04:00	7.30137		2015-02-09 21:45:00	4.63598		2014-10-03 09:13:00	10.0632
2014-12-14 18:19:00	7.09152		2014-08-27 01:04:00	7.29833		2015-02-09 21:55:00	4.63441		2014-10-03 10:13:00	10.0617
2014-12-14 18:29:00	7.09152		2014-08-27 02:04:00	7.30137		2015-02-09 22:05:00	4.63285		2014-10-03 11:13:00	10.0617
2014-12-14 18:39:00	7.09304		2014-08-27 03:04:00	7.30137		2015-02-09 22:15:00	4.63128		2014-10-03 12:13:00	10.0632
2014-12-14 18:49:00	7.09304		2014-08-27 04:04:00	7.30137		2015-02-09 22:25:00	4.62502		2014-10-03 13:13:00	10.0588
2014-12-14 18:59:00	7.09456		2014-08-27 05:04:00	7.29377		2015-02-09 22:35:00	4.61875		2014-10-03 14:13:00	10.0617
2014-12-14 19:09:00	7.09304		2014-08-27 06:04:00	7.29681		2015-02-09 22:45:00	4.61718		2014-10-03 15:13:00	10.0617
2014-12-14 19:19:00	7.09304		2014-08-27 07:04:00	7.29681		2015-02-09 22:55:00	4.61405		2014-10-03 16:13:00	10.0588
2014-12-14 19:29:00	7.09152		2014-08-27 08:04:00	7.29681		2015-02-09 23:05:00	4.61091		2014-10-03 17:13:00	10.0617
2014-12-14 19:39:00	7.09152		2014-08-27 09:04:00	7.29833		2015-02-09 23:15:00	4.60778		2014-10-03 18:13:00	10.0602
2014-12-14 19:49:00	7.09152		2014-08-27 10:04:00	7.30137		2015-02-09 23:25:00	4.60935		2014-10-03 19:13:00	10.0632
2014-12-14 19:59:00	7.08999		2014-08-27 11:04:00	7.29681		2015-02-09 23:35:00	4.60621		2014-10-03 20:13:00	10.0617
2014-12-14 20:09:00	7.08999		2014-08-27 12:04:00	7.29377		2015-02-09 23:45:00	4.60151		2014-10-03 21:13:00	10.0602
2014-12-14 20:19:00	7.09152		2014-08-27 13:04:00	7.29681		2015-02-09 23:55:00	4.60151		2014-10-03 22:13:00	10.0617
2014-12-14 20:29:00	7.09152		2014-08-27 14:04:00	7.29529		2015-02-10 00:05:00	4.59995		2014-10-03 23:13:00	10.0588
2014-12-14 20:39:00	7.08999		2014-08-27 15:04:00	7.29529		2015-02-10 00:15:00	4.59995		2014-10-04 00:13:00	10.0617
2014-12-14 20:49:00	7.08999		2014-08-27 16:04:00	7.29681		2015-02-10 00:25:00	4.60308		2014-10-04 01:13:00	10.0588
2014-12-14 20:59:00	7.09152		2014-08-27 17:04:00	7.29377		2015-02-10 00:35:00	4.60308		2014-10-04 02:13:00	10.0617
2014-12-14 21:09:00	7.09152		2014-08-27 18:04:00	7.29833		2015-02-10 00:45:00	4.60621		2014-10-04 03:13:00	10.0602
2014-12-14 21:19:00	7.09152		2014-08-27 19:04:00	7.29073		2015-02-10 00:55:00	4.60621		2014-10-04 04:13:00	10.0602
2014-12-14 21:29:00	7.09152		2014-08-27 20:04:00	7.29833		2015-02-10 01:05:00	4.60151		2014-10-04 05:13:00	10.0602
2014-12-14 21:39:00	7.09152		2014-08-27 21:04:00	7.29985		2015-02-10 01:15:00	4.59681		2014-10-04 06:13:00	10.0617
2014-12-14 21:49:00	7.08999		2014-08-27 22:04:00	7.29225		2015-02-10 01:25:00	4.59211		2014-10-04 07:13:00	10.0588
2014-12-14 21:59:00	7.08847		2014-08-27 23:04:00	7.29985		2015-02-10 01:35:00	4.59524		2014-10-04 08:13:00	10.0602
2014-12-14 22:09:00	7.08847		2014-08-28 00:04:00	7.30288		2015-02-10 01:45:00	4.59524		2014-10-04 09:13:00	10.0617
2014-12-14 22:19:00	7.08999		2014-08-28 01:04:00	7.30137		2015-02-10 01:55:00	4.59211		2014-10-04 10:13:00	10.0573
2014-12-14 22:29:00	7.08999		2014-08-28 02:04:00	7.29681		2015-02-10 02:05:00	4.58898		2014-10-04 11:13:00	10.0558
2014-12-14 22:39:00	7.08999		2014-08-28 03:04:00	7.30288		2015-02-10 02:15:00	4.58741		2014-10-04 12:13:00	10.0602
2014-12-14 22:49:00	7.08999		2014-08-28 04:04:00	7.30288		2015-02-10 02:25:00	4.58271		2014-10-04 13:13:00	10.0528
2014-12-14 22:59:00	7.08999		2014-08-28 05:04:00	7.29985		2015-02-10 02:35:00	4.57957		2014-10-04 14:13:00	10.0573
2014-12-14 23:09:00	7.09152		2014-08-28 06:04:00	7.30288		2015-02-10 02:45:00	4.57644		2014-10-04 15:13:00	10.0602
2014-12-14 23:19:00	7.08999		2014-08-28 07:04:00	7.3044		2015-02-10 02:55:00	4.578		2014-10-04 16:13:00	10.0558
2014-12-14 23:29:00	7.09152		2014-08-28 08:04:00	7.30288		2015-02-10 03:05:00	4.5733		2014-10-04 17:13:00	10.0573
2014-12-14 23:39:00	7.09304		2014-08-28 09:04:00	7.31048		2015-02-10 03:15:00	4.57173		2014-10-04 18:13:00	10.0543
2014-12-14 23:49:00	7.09152		2014-08-28 10:04:00	7.312		2015-02-10 03:25:00	4.5686		2014-10-04 19:13:00	10.0617
2014-12-14 23:59:00	7.09152		2014-08-28 11:04:00	7.30288		2015-02-10 03:35:00	4.56389		2014-10-04 20:13:00	10.0588
2014-12-15 00:09:00	7.08999		2014-08-28 12:04:00	7.30288		2015-02-10 03:45:00	4.56546		2014-10-04 21:13:00	10.0632
2014-12-15 00:19:00	7.09152		2014-08-28 13:04:00	7.3044		2015-02-10 03:55:00	4.56233		2014-10-04 22:13:00	10.0617
2014-12-15 00:29:00	7.09152		2014-08-28 14:04:00	7.30744		2015-02-10 04:05:00	4.56076		2014-10-04 23:13:00	10.0543
2014-12-15 00:39:00	7.08999		2014-08-28 15:04:00	7.30744		2015-02-10 04:15:00	4.55919		2014-10-05 00:13:00	10.0602
2014-12-15 00:49:00	7.08999		2014-08-28 16:04:00	7.3044		2015-02-10 04:25:00	4.56076		2014-10-05 01:13:00	10.0543
2014-12-15 00:59:00	7.08847		2014-08-28 17:04:00	7.30744		2015-02-10 04:35:00	4.56076		2014-10-05 02:13:00	10.0543
2014-12-15 01:09:00	7.08847		2014-08-28 18:04:00	7.30744		2015-02-10 04:45:00	4.55919		2014-10-05 03:13:00	10.0573
2014-12-15 01:19:00	7.08847		2014-08-28 19:04:00	7.30896		2015-02-10 04:55:00	4.55919		2014-10-05 04:13:00	10.0602
2014-12-15 01:29:00	7.08847		2014-08-28 20:04:00	7.30592		2015-02-10 05:05:00	4.55919		2014-10-05 05:13:00	10.0499
2014-12-15 01:39:00	7.08847		2014-08-28 21:04:00	7.32111		2015-02-10 05:15:00	4.55762		2014-10-05 06:13:00	10.0514
2014-12-15 01:49:00	7.08695		2014-08-28 22:04:00	7.30744		2015-02-10 05:25:00	4.55449		2014-10-05 07:13:00	10.0469
2014-12-15 01:59:00	7.08695		2014-08-28 23:04:00	7.31504		2015-02-10 05:35:00	4.56233		2014-10-05 08:13:00	10.0573
2014-12-15 02:09:00	7.08847		2014-08-29 00:04:00	7.312		2015-02-10 05:45:00	4.56389		2014-10-05 09:13:00	10.0588
2014-12-15 02:19:00	7.08847		2014-08-29 01:04:00	7.31807		2015-02-10 05:55:00	4.55919		2014-10-05 10:13:00	10.0558
2014-12-15 02:29:00	7.08847		2014-08-29 02:04:00	7.31807		2015-02-10 06:05:00	4.55606		2014-10-05 11:13:00	10.0573
2014-12-15 02:39:00	7.08847		2014-08-29 03:04:00	7.312		2015-02-10 06:15:00	4.55919		2014-10-05 12:13:00	10.0573
2014-12-15 02:49:00	7.08695		2014-08-29 04:04:00	7.32263		2015-02-10 06:25:00	4.55919		2014-10-05 13:13:00	10.0558
2014-12-15 02:59:00	7.08695		2014-08-29 05:04:00	7.31504		2015-02-10 06:35:00	4.55919		2014-10-05 14:13:00	10.0528
2014-12-15 03:09:00	7.08695		2014-08-29 06:04:00	7.312		2015-02-10 06:45:00	4.55762		2014-10-05 15:13:00	10.0558
2014-12-15 03:19:00	7.08695		2014-08-29 07:04:00	7.30288		2015-02-10 06:55:00	4.55449		2014-10-05 16:13:00	10.0573
2014-12-15 03:29:00	7.08695		2014-08-29 08:04:00	7.30288		2015-02-10 07:05:00	4.55135		2014-10-05 17:13:00	10.0602
2014-12-15 03:39:00	7.08847		2014-08-29 09:04:00	7.31048		2015-02-10 07:15:00	4.54822		2014-10-05 18:13:00	10.0588
2014-12-15 03:49:00	7.08847		2014-08-29 10:04:00	7.30288		2015-02-10 07:25:00	4.54665		2014-10-05 19:13:00	10.0602
2014-12-15 03:59:00	7.08847		2014-08-29 11:04:00	7.30592		2015-02-10 07:35:00	4.54194		2014-10-05 20:13:00	10.0602
2014-12-15 04:09:00	7.08847		2014-08-29 12:04:00	7.30744		2015-02-10 07:45:00	4.53881		2014-10-05 21:13:00	10.0558
2014-12-15 04:19:00	7.08543		2014-08-29 13:04:00	7.29833		2015-02-10 07:55:00	4.53567		2014-10-05 22:13:00	10.0528
2014-12-15 04:29:00	7.08543		2014-08-29 14:04:00	7.29985		2015-02-10 08:05:00	4.53096		2014-10-05 23:13:00	10.0617
2014-12-15 04:39:00	7.08543		2014-08-29 15:04:00	7.29985		2015-02-10 08:15:00	4.5294		2014-10-06 00:13:00	10.0602
2014-12-15 04:49:00	7.08543		2014-08-29 16:04:00	7.30288		2015-02-10 08:25:00	4.52469		2014-10-06 01:13:00	10.0573
2014-12-15 04:59:00	7.08543		2014-08-29 17:04:00	7.30744		2015-02-10 08:35:00	4.52469		2014-10-06 02:13:00	10.0602
2014-12-15 05:09:00	7.08695		2014-08-29 18:04:00	7.30288		2015-02-10 08:45:00	4.52469		2014-10-06 03:13:00	10.0543
2014-12-15 05:19:00	7.08695		2014-08-29 19:04:00	7.3044		2015-02-10 08:55:00	4.52155		2014-10-06 04:13:00	10.0558
2014-12-15 05:29:00	7.08543		2014-08-29 20:04:00	7.30288		2015-02-10 09:05:00	4.52469		2014-10-06 05:13:00	10.0558
2014-12-15 05:39:00	7.08543		2014-08-29 21:04:00	7.30744		2015-02-10 09:15:00	4.51998		2014-10-06 06:13:00	10.0528
2014-12-15 05:49:00	7.08543		2014-08-29 22:04:00	7.31048		2015-02-10 09:25:00	4.51998		2014-10-06 07:13:00	10.0558
2014-12-15 05:59:00	7.08543		2014-08-29 23:04:00	7.29681		2015-02-10 09:35:00	4.51842		2014-10-06 08:13:00	10.0558
2014-12-15 06:09:00	7.08543		2014-08-30 00:04:00	7.30137		2015-02-10 09:45:00	4.52626		2014-10-06 09:13:00	10.0558
2014-12-15 06:19:00	7.0839		2014-08-30 01:04:00	7.30137		2015-02-10 09:55:00	4.53096		2014-10-06 10:13:00	10.0573
2014-12-15 06:29:00	7.0839		2014-08-30 02:04:00	7.30137		2015-02-10 10:05:00	4.53096		2014-10-06 11:13:00	10.0617
2014-12-15 06:39:00	7.08543		2014-08-30 03:04:00	7.29833		2015-02-10 10:15:00	4.5294		2014-10-06 12:13:00	10.0588
2014-12-15 06:49:00	7.08543		2014-08-30 04:04:00	7.29833		2015-02-10 10:25:00	4.53096		2014-10-06 13:13:00	10.0528
2014-12-15 06:59:00	7.08543		2014-08-30 05:04:00	7.29833		2015-02-10 10:35:00	4.53881		2014-10-06 14:13:00	10.0558
2014-12-15 07:09:00	7.08543		2014-08-30 06:04:00	7.29833		2015-02-10 10:45:00	4.54037		2014-10-06 15:13:00	10.0602
2014-12-15 07:19:00	7.08543		2014-08-30 07:04:00	7.30288		2015-02-10 10:55:00	4.54822		2014-10-06 16:13:00	10.0588
2014-12-15 07:29:00	7.08543		2014-08-30 08:04:00	7.31655		2015-02-10 11:05:00	4.55135		2014-10-06 17:13:00	10.0588
2014-12-15 07:39:00	7.08695		2014-08-30 09:04:00	7.31655		2015-02-10 11:15:00	4.55449		2014-10-06 18:13:00	10.0573
2014-12-15 07:49:00	7.08695		2014-08-30 10:04:00	7.31504		2015-02-10 11:25:00	4.55919		2014-10-06 19:13:00	10.0543
2014-12-15 07:59:00	7.08543		2014-08-30 11:04:00	7.30137		2015-02-10 11:35:00	4.56233		2014-10-06 20:13:00	10.0573
2014-12-15 08:09:00	7.08543		2014-08-30 12:04:00	7.30896		2015-02-10 11:45:00	4.55919		2014-10-06 21:13:00	10.0602
2014-12-15 08:19:00	7.08695		2014-08-30 13:04:00	7.312		2015-02-10 11:55:00	4.56233		2014-10-06 22:13:00	10.0588
2014-12-15 08:29:00	7.08695		2014-08-30 14:04:00	7.31655		2015-02-10 12:05:00	4.56233		2014-10-06 23:13:00	10.0602
2014-12-15 08:39:00	7.08695		2014-08-30 15:04:00	7.30592		2015-02-10 12:15:00	4.56389		2014-10-07 00:13:00	10.0558
2014-12-15 08:49:00	7.08543		2014-08-30 16:04:00	7.30896		2015-02-10 12:25:00	4.56703		2014-10-07 01:13:00	10.0588
2014-12-15 08:59:00	7.08543		2014-08-30 17:04:00	7.30744		2015-02-10 12:35:00	4.57173		2014-10-07 02:13:00	10.0558
2014-12-15 09:09:00	7.08695		2014-08-30 18:04:00	7.312		2015-02-10 12:45:00	4.5733		2014-10-07 03:13:00	10.0573
2014-12-15 09:19:00	7.08543		2014-08-30 19:04:00	7.312		2015-02-10 12:55:00	4.578		2014-10-07 04:13:00	10.0514
2014-12-15 09:29:00	7.08543		2014-08-30 20:04:00	7.32111		2015-02-10 13:05:00	4.57957		2014-10-07 05:13:00	10.0573
2014-12-15 09:39:00	7.08695		2014-08-30 21:04:00	7.30896		2015-02-10 13:15:00	4.57957		2014-10-07 06:13:00	10.0573
2014-12-15 09:49:00	7.08543		2014-08-30 22:04:00	7.30896		2015-02-10 13:25:00	4.58271		2014-10-07 07:13:00	10.0632
2014-12-15 09:59:00	7.08543		2014-08-30 23:04:00	7.31655		2015-02-10 13:35:00	4.58584		2014-10-07 08:13:00	10.0602
2014-12-15 10:09:00	7.08543		2014-08-31 00:04:00	7.31655		2015-02-10 13:45:00	4.58741		2014-10-07 09:13:00	10.0617
2014-12-15 10:19:00	7.08543		2014-08-31 01:04:00	7.31352		2015-02-10 13:55:00	4.59054		2014-10-07 10:13:00	10.0558
2014-12-15 10:29:00	7.08543		2014-08-31 02:04:00	7.31048		2015-02-10 14:05:00	4.59524		2014-10-07 11:13:00	10.0543
2014-12-15 10:39:00	7.08543		2014-08-31 03:04:00	7.31352		2015-02-10 14:15:00	4.59838		2014-10-07 12:13:00	10.0632
2014-12-15 10:49:00	7.0839		2014-08-31 04:04:00	7.31352		2015-02-10 14:25:00	4.59838		2014-10-07 13:13:00	10.0558
2014-12-15 10:59:00	7.08543		2014-08-31 05:04:00	7.31655		2015-02-10 14:35:00	4.59995		2014-10-07 14:13:00	10.0573
2014-12-15 11:09:00	7.08543		2014-08-31 06:04:00	7.30744		2015-02-10 14:45:00	4.60151		2014-10-07 15:13:00	10.0573
2014-12-15 11:19:00	7.08543		2014-08-31 07:04:00	7.30744		2015-02-10 14:55:00	4.59995		2014-10-07 16:13:00	10.0558
2014-12-15 11:29:00	7.08543		2014-08-31 08:04:00	7.30137		2015-02-10 15:05:00	4.60151		2014-10-07 17:13:00	10.0588
2014-12-15 11:39:00	7.08543		2014-08-31 09:04:00	7.3044		2015-02-10 15:15:00	4.60308		2014-10-07 18:13:00	10.0588
2014-12-15 11:49:00	7.08543		2014-08-31 10:04:00	7.29985		2015-02-10 15:25:00	4.60465		2014-10-07 19:13:00	10.0617
2014-12-15 11:59:00	7.08543		2014-08-31 11:04:00	7.30592		2015-02-10 15:35:00	4.60621		2014-10-07 20:13:00	10.0573
2014-12-15 12:09:00	7.0839		2014-08-31 12:04:00	7.29985		2015-02-10 15:45:00	4.60621		2014-10-07 21:13:00	10.0588
2014-12-15 12:19:00	7.0839		2014-08-31 13:04:00	7.29985		2015-02-10 15:55:00	4.60308		2014-10-07 22:13:00	10.0573
2014-12-15 12:29:00	7.08238		2014-08-31 14:04:00	7.3044		2015-02-10 16:05:00	4.60151		2014-10-07 23:13:00	10.0573
2014-12-15 12:39:00	7.08238		2014-08-31 15:04:00	7.29833		2015-02-10 16:15:00	4.60151		2014-10-08 00:13:00	10.0588
2014-12-15 12:49:00	7.08238		2014-08-31 16:04:00	7.29833		2015-02-10 16:25:00	4.60151		2014-10-08 01:13:00	10.0588
2014-12-15 12:59:00	7.0839		2014-08-31 17:04:00	7.3044		2015-02-10 16:35:00	4.59995		2014-10-08 02:13:00	10.0573
2014-12-15 13:09:00	7.0839		2014-08-31 18:04:00	7.30744		2015-02-10 16:45:00	4.59995		2014-10-08 03:13:00	10.0573
2014-12-15 13:19:00	7.0839		2014-08-31 19:04:00	7.3044		2015-02-10 16:55:00	4.59995		2014-10-08 04:13:00	10.0588
2014-12-15 13:29:00	7.08238		2014-08-31 20:04:00	7.30288		2015-02-10 17:05:00	4.59995		2014-10-08 05:13:00	10.0573
2014-12-15 13:39:00	7.0839		2014-08-31 21:04:00	7.31048		2015-02-10 17:15:00	4.60308		2014-10-08 06:13:00	10.0573
2014-12-15 13:49:00	7.0839		2014-08-31 22:04:00	7.30592		2015-02-10 17:25:00	4.60465		2014-10-08 07:13:00	10.0543
2014-12-15 13:59:00	7.08238		2014-08-31 23:04:00	7.30592		2015-02-10 17:35:00	4.60308		2014-10-08 08:13:00	10.0588
2014-12-15 14:09:00	7.08238		2014-09-01 00:04:00	7.30288		2015-02-10 17:45:00	4.60151		2014-10-08 09:13:00	10.0573
2014-12-15 14:19:00	7.08238		2014-09-01 01:04:00	7.30592		2015-02-10 17:55:00	4.59995		2014-10-08 10:13:00	10.0573
2014-12-15 14:29:00	7.08238		2014-09-01 02:04:00	7.31352		2015-02-10 18:05:00	4.59838		2014-10-08 11:13:00	10.0588
2014-12-15 14:39:00	7.08238		2014-09-01 03:04:00	7.30288		2015-02-10 18:15:00	4.59995		2014-10-08 12:13:00	10.0617
2014-12-15 14:49:00	7.0839		2014-09-01 04:04:00	7.30896		2015-02-10 18:25:00	4.59838		2014-10-08 13:13:00	10.0558
2014-12-15 14:59:00	7.08238		2014-09-01 05:04:00	7.30288		2015-02-10 18:35:00	4.59681		2014-10-08 14:13:00	10.0588
2014-12-15 15:09:00	7.08238		2014-09-01 06:04:00	7.30744		2015-02-10 18:45:00	4.59524		2014-10-08 15:13:00	10.0558
2014-12-15 15:19:00	7.08238		2014-09-01 07:04:00	7.3044		2015-02-10 18:55:00	4.59211		2014-10-08 16:13:00	10.0573
2014-12-15 15:29:00	7.08238		2014-09-01 08:04:00	7.30288		2015-02-10 19:05:00	4.59054		2014-10-08 17:13:00	10.0573
2014-12-15 15:39:00	7.08238		2014-09-01 09:04:00	7.3044		2015-02-10 19:15:00	4.58741		2014-10-08 18:13:00	10.0602
2014-12-15 15:49:00	7.08086		2014-09-01 10:04:00	7.31048		2015-02-10 19:25:00	4.58741		2014-10-08 19:13:00	10.0588
2014-12-15 15:59:00	7.08086		2014-09-01 11:04:00	7.30744		2015-02-10 19:35:00	4.58584		2014-10-08 20:13:00	10.0602
2014-12-15 16:09:00	7.08086		2014-09-01 12:04:00	7.312		2015-02-10 19:45:00	4.58114		2014-10-08 21:13:00	10.0617
2014-12-15 16:19:00	7.08086		2014-09-01 13:04:00	7.30288		2015-02-10 19:55:00	4.57957		2014-10-08 22:13:00	10.0573
2014-12-15 16:29:00	7.08238		2014-09-01 14:04:00	7.30744		2015-02-10 20:05:00	4.578		2014-10-08 23:13:00	10.0573
2014-12-15 16:39:00	7.08086		2014-09-01 15:04:00	7.3044		2015-02-10 20:15:00	4.57644		2014-10-09 00:13:00	10.0588
2014-12-15 16:49:00	7.08238		2014-09-01 16:04:00	7.31352		2015-02-10 20:25:00	4.57644		2014-10-09 01:13:00	10.0558
2014-12-15 16:59:00	7.08086		2014-09-01 17:04:00	7.31048		2015-02-10 20:35:00	4.5733		2014-10-09 02:13:00	10.0588
2014-12-15 17:09:00	7.08086		2014-09-01 18:04:00	7.30896		2015-02-10 20:45:00	4.57487		2014-10-09 03:13:00	10.0543
2014-12-15 17:19:00	7.08238		2014-09-01 19:04:00	7.30896		2015-02-10 20:55:00	4.57644		2014-10-09 04:13:00	10.0528
2014-12-15 17:29:00	7.08238		2014-09-01 20:04:00	7.31352		2015-02-10 21:05:00	4.5733		2014-10-09 05:13:00	10.0543
2014-12-15 17:39:00	7.08238		2014-09-01 21:04:00	7.312		2015-02-10 21:15:00	4.5733		2014-10-09 06:13:00	10.0573
2014-12-15 17:49:00	7.08238		2014-09-01 22:04:00	7.31048		2015-02-10 21:25:00	4.57173		2014-10-09 07:13:00	10.0528
2014-12-15 17:59:00	7.08238		2014-09-01 23:04:00	7.31048		2015-02-10 21:35:00	4.56703		2014-10-09 08:13:00	10.0588
2014-12-15 18:09:00	7.08238		2014-09-02 00:04:00	7.31048		2015-02-10 21:45:00	4.56703		2014-10-09 09:13:00	10.0588
2014-12-15 18:19:00	7.08238		2014-09-02 01:04:00	7.31048		2015-02-10 21:55:00	4.56389		2014-10-09 10:13:00	10.0558
2014-12-15 18:29:00	7.08238		2014-09-02 02:04:00	7.30896		2015-02-10 22:05:00	4.56076		2014-10-09 11:13:00	10.0573
2014-12-15 18:39:00	7.0839		2014-09-02 03:04:00	7.312		2015-02-10 22:15:00	4.55762		2014-10-09 12:13:00	10.0558
2014-12-15 18:49:00	7.08238		2014-09-02 04:04:00	7.312		2015-02-10 22:25:00	4.55762		2014-10-09 13:13:00	10.0588
2014-12-15 18:59:00	7.08238		2014-09-02 05:04:00	7.30744		2015-02-10 22:35:00	4.55762		2014-10-09 14:13:00	10.0588
2014-12-15 19:09:00	7.08238		2014-09-02 06:04:00	7.30744		2015-02-10 22:45:00	4.55292		2014-10-09 15:13:00	10.0632
2014-12-15 19:19:00	7.08086		2014-09-02 07:04:00	7.30896		2015-02-10 22:55:00	4.55292		2014-10-09 16:13:00	10.0588
2014-12-15 19:29:00	7.08086		2014-09-02 08:04:00	7.30896		2015-02-10 23:05:00	4.54822		2014-10-09 17:13:00	10.0632
2014-12-15 19:39:00	7.08086		2014-09-02 09:04:00	7.312		2015-02-10 23:15:00	4.54508		2014-10-09 18:13:00	10.0632
2014-12-15 19:49:00	7.08086		2014-09-02 10:04:00	7.31048		2015-02-10 23:25:00	4.54194		2014-10-09 19:13:00	10.0573
2014-12-15 19:59:00	7.08086		2014-09-02 11:04:00	7.31048		2015-02-10 23:35:00	4.54194		2014-10-09 20:13:00	10.0588
2014-12-15 20:09:00	7.08086		2014-09-02 12:04:00	7.31352		2015-02-10 23:45:00	4.53881		2014-10-09 21:13:00	10.0617
2014-12-15 20:19:00	7.08086		2014-09-02 13:04:00	7.31048		2015-02-10 23:55:00	4.53881		2014-10-09 22:13:00	10.0632
2014-12-15 20:29:00	7.07934		2014-09-02 14:04:00	7.30896		2015-02-11 00:05:00	4.53881		2014-10-09 23:13:00	10.0632
2014-12-15 20:39:00	7.08086		2014-09-02 15:04:00	7.30744		2015-02-11 00:15:00	4.53881		2014-10-10 00:13:00	10.0588
2014-12-15 20:49:00	7.08238		2014-09-02 16:04:00	7.30744		2015-02-11 00:25:00	4.53724		2014-10-10 01:13:00	10.0588
2014-12-15 20:59:00	7.08086		2014-09-02 17:04:00	7.30896		2015-02-11 00:35:00	4.5341		2014-10-10 02:13:00	10.0588
2014-12-15 21:09:00	7.07934		2014-09-02 18:04:00	7.31048		2015-02-11 00:45:00	4.5294		2014-10-10 03:13:00	10.0573
2014-12-15 21:19:00	7.07934		2014-09-02 19:04:00	7.30896		2015-02-11 00:55:00	4.52783		2014-10-10 04:13:00	10.0573
2014-12-15 21:29:00	7.07934		2014-09-02 20:04:00	7.31048		2015-02-11 01:05:00	4.52783		2014-10-10 05:13:00	10.0588
2014-12-15 21:39:00	7.08086		2014-09-02 21:04:00	7.31352		2015-02-11 01:15:00	4.52783		2014-10-10 06:13:00	10.0602
2014-12-15 21:49:00	7.08086		2014-09-02 22:04:00	7.31048		2015-02-11 01:25:00	4.52626		2014-10-10 07:13:00	10.0573
2014-12-15 21:59:00	7.07934		2014-09-02 23:04:00	7.30896		2015-02-11 01:35:00	4.52626		2014-10-10 08:13:00	10.0573
2014-12-15 22:09:00	7.07934		2014-09-03 00:04:00	7.31048		2015-02-11 01:45:00	4.52312		2014-10-10 09:13:00	10.0573
2014-12-15 22:19:00	7.07934		2014-09-03 01:04:00	7.30896		2015-02-11 01:55:00	4.51842		2014-10-10 10:13:00	10.0573
2014-12-15 22:29:00	7.07781		2014-09-03 02:04:00	7.31048		2015-02-11 02:05:00	4.52155		2014-10-10 11:13:00	10.0588
2014-12-15 22:39:00	7.07934		2014-09-03 03:04:00	7.30896		2015-02-11 02:15:00	4.51998		2014-10-10 12:13:00	10.0558
2014-12-15 22:49:00	7.07934		2014-09-03 04:04:00	7.30896		2015-02-11 02:25:00	4.51685		2014-10-10 13:13:00	10.0573
2014-12-15 22:59:00	7.07934		2014-09-03 05:04:00	7.30896		2015-02-11 02:35:00	4.51371		2014-10-10 14:13:00	10.0632
2014-12-15 23:09:00	7.07934		2014-09-03 06:04:00	7.30896		2015-02-11 02:45:00	4.51685		2014-10-10 15:13:00	10.0617
2014-12-15 23:19:00	7.07934		2014-09-03 07:04:00	7.30744		2015-02-11 02:55:00	4.51528		2014-10-10 16:13:00	10.0588
2014-12-15 23:29:00	7.07781		2014-09-03 08:04:00	7.30896		2015-02-11 03:05:00	4.51214		2014-10-10 17:13:00	10.0573
2014-12-15 23:39:00	7.07781		2014-09-03 09:04:00	7.30744		2015-02-11 03:15:00	4.51214		2014-10-10 18:13:00	10.0632
2014-12-15 23:49:00	7.07629		2014-09-03 10:04:00	7.30896		2015-02-11 03:25:00	4.51214		2014-10-10 19:13:00	10.0573
2014-12-15 23:59:00	7.07781		2014-09-03 11:04:00	7.30896		2015-02-11 03:35:00	4.50743		2014-10-10 20:13:00	10.0588
2014-12-16 00:09:00	7.07934		2014-09-03 12:04:00	7.30744		2015-02-11 03:45:00	4.50586		2014-10-10 21:13:00	10.0602
2014-12-16 00:19:00	7.07781		2014-09-03 13:04:00	7.30896		2015-02-11 03:55:00	4.5043		2014-10-10 22:13:00	10.0617
2014-12-16 00:29:00	7.07781		2014-09-03 14:04:00	7.31048		2015-02-11 04:05:00	4.50586		2014-10-10 23:13:00	10.0588
2014-12-16 00:39:00	7.07781		2014-09-03 15:04:00	7.30592		2015-02-11 04:15:00	4.5043		2014-10-11 00:13:00	10.0602
2014-12-16 00:49:00	7.07629		2014-09-03 16:04:00	7.312		2015-02-11 04:25:00	4.5043		2014-10-11 01:13:00	10.0558
2014-12-16 00:59:00	7.07629		2014-09-03 17:04:00	7.30896		2015-02-11 04:35:00	4.50273		2014-10-11 02:13:00	10.0617
2014-12-16 01:09:00	7.07477		2014-09-03 18:04:00	7.31048		2015-02-11 04:45:00	4.49959		2014-10-11 03:13:00	10.0588
2014-12-16 01:19:00	7.07477		2014-09-03 19:04:00	7.30744		2015-02-11 04:55:00	4.49802		2014-10-11 04:13:00	10.0558
2014-12-16 01:29:00	7.07477		2014-09-03 20:04:00	7.31048		2015-02-11 05:05:00	4.49331		2014-10-11 05:13:00	10.0543
2014-12-16 01:39:00	7.07325		2014-09-03 21:04:00	7.312		2015-02-11 05:15:00	4.49017		2014-10-11 06:13:00	10.0617
2014-12-16 01:49:00	7.07325		2014-09-03 22:04:00	7.31048		2015-02-11 05:25:00	4.48547		2014-10-11 07:13:00	10.0573
2014-12-16 01:59:00	7.07325		2014-09-03 23:04:00	7.31048		2015-02-11 05:35:00	4.48547		2014-10-11 08:13:00	10.0602
2014-12-16 02:09:00	7.07172		2014-09-04 00:04:00	7.31048		2015-02-11 05:45:00	4.47919		2014-10-11 09:13:00	10.0558
2014-12-16 02:19:00	7.07172		2014-09-04 01:04:00	7.30744		2015-02-11 05:55:00	4.48076		2014-10-11 10:13:00	10.0602
2014-12-16 02:29:00	7.0702		2014-09-04 02:04:00	7.30592		2015-02-11 06:05:00	4.48076		2014-10-11 11:13:00	10.0602
2014-12-16 02:39:00	7.07172		2014-09-04 03:04:00	7.312		2015-02-11 06:15:00	4.47762		2014-10-11 12:13:00	10.0573
2014-12-16 02:49:00	7.07172		2014-09-04 04:04:00	7.30592		2015-02-11 06:25:00	4.47448		2014-10-11 13:13:00	10.0573
2014-12-16 02:59:00	7.07172		2014-09-04 05:04:00	7.30744		2015-02-11 06:35:00	4.47134		2014-10-11 14:13:00	10.0573
2014-12-16 03:09:00	7.0702		2014-09-04 06:04:00	7.31048		2015-02-11 06:45:00	4.4682		2014-10-11 15:13:00	10.0573
2014-12-16 03:19:00	7.07172		2014-09-04 07:04:00	7.31048		2015-02-11 06:55:00	4.46663		2014-10-11 16:13:00	10.0602
2014-12-16 03:29:00	7.07172		2014-09-04 08:04:00	7.31352		2015-02-11 07:05:00	4.47134		2014-10-11 17:13:00	10.0558
2014-12-16 03:39:00	7.07325		2014-09-04 09:04:00	7.30896		2015-02-11 07:15:00	4.4682		2014-10-11 18:13:00	10.0588
2014-12-16 03:49:00	7.07325		2014-09-04 10:04:00	7.31048		2015-02-11 07:25:00	4.46506		2014-10-11 19:13:00	10.0617
2014-12-16 03:59:00	7.07477		2014-09-04 11:04:00	7.30896		2015-02-11 07:35:00	4.46506		2014-10-11 20:13:00	10.0573
2014-12-16 04:09:00	7.07325		2014-09-04 12:04:00	7.30896		2015-02-11 07:45:00	4.46192		2014-10-11 21:13:00	10.0602
2014-12-16 04:19:00	7.07325		2014-09-04 13:04:00	7.30592		2015-02-11 07:55:00	4.45878		2014-10-11 22:13:00	10.0602
2014-12-16 04:29:00	7.07325		2014-09-04 14:04:00	7.30592		2015-02-11 08:05:00	4.45878		2014-10-11 23:13:00	10.0573
2014-12-16 04:39:00	7.07325		2014-09-04 15:04:00	7.30744		2015-02-11 08:15:00	4.45878		2014-10-12 00:13:00	10.0573
2014-12-16 04:49:00	7.07325		2014-09-04 16:04:00	7.30896		2015-02-11 08:25:00	4.45564		2014-10-12 01:13:00	10.0558
2014-12-16 04:59:00	7.07325		2014-09-04 17:04:00	7.30744		2015-02-11 08:35:00	4.45407		2014-10-12 02:13:00	10.0543
2014-12-16 05:09:00	7.0702		2014-09-04 18:04:00	7.30896		2015-02-11 08:45:00	4.45564		2014-10-12 03:13:00	10.0558
2014-12-16 05:19:00	7.07325		2014-09-04 19:04:00	7.30896		2015-02-11 08:55:00	4.4525		2014-10-12 04:13:00	10.0573
2014-12-16 05:29:00	7.07172		2014-09-04 20:04:00	7.31048		2015-02-11 09:05:00	4.4525		2014-10-12 05:13:00	10.0573
2014-12-16 05:39:00	7.07172		2014-09-04 21:04:00	7.30744		2015-02-11 09:15:00	4.45564		2014-10-12 06:13:00	10.0558
2014-12-16 05:49:00	7.07477		2014-09-04 22:04:00	7.30592		2015-02-11 09:25:00	4.45878		2014-10-12 07:13:00	10.0588
2014-12-16 05:59:00	7.08086		2014-09-04 23:04:00	7.30744		2015-02-11 09:35:00	4.45721		2014-10-12 08:13:00	10.0573
2014-12-16 06:09:00	7.08543		2014-09-05 00:04:00	7.30592		2015-02-11 09:45:00	4.45878		2014-10-12 09:13:00	10.0558
2014-12-16 06:19:00	7.08847		2014-09-05 01:04:00	7.3044		2015-02-11 09:55:00	4.46349		2014-10-12 10:13:00	10.0573
2014-12-16 06:29:00	7.08999		2014-09-05 02:04:00	7.30288		2015-02-11 10:05:00	4.46506		2014-10-12 11:13:00	10.0573
2014-12-16 06:39:00	7.09152		2014-09-05 03:04:00	7.30288		2015-02-11 10:15:00	4.46977		2014-10-12 12:13:00	10.0573
2014-12-16 06:49:00	7.09152		2014-09-05 04:04:00	7.30288		2015-02-11 10:25:00	4.46977		2014-10-12 13:13:00	10.0573
2014-12-16 06:59:00	7.09152		2014-09-05 05:04:00	7.30288		2015-02-11 10:35:00	4.47448		2014-10-12 14:13:00	10.0573
2014-12-16 07:09:00	7.09152		2014-09-05 06:04:00	7.30744		2015-02-11 10:45:00	4.48076		2014-10-12 15:13:00	10.0573
2014-12-16 07:19:00	7.09304		2014-09-05 07:04:00	7.31048		2015-02-11 10:55:00	4.4839		2014-10-12 16:13:00	10.0617
2014-12-16 07:29:00	7.09304		2014-09-05 08:04:00	7.30592		2015-02-11 11:05:00	4.48703		2014-10-12 17:13:00	10.0677
2014-12-16 07:39:00	7.09304		2014-09-05 09:04:00	7.30896		2015-02-11 11:15:00	4.49174		2014-10-12 18:13:00	10.0677
2014-12-16 07:49:00	7.09304		2014-09-05 10:04:00	7.30288		2015-02-11 11:25:00	4.49488		2014-10-12 19:13:00	10.0662
2014-12-16 07:59:00	7.09304		2014-09-05 11:04:00	7.30137		2015-02-11 11:35:00	4.49488		2014-10-12 20:13:00	10.0558
2014-12-16 08:09:00	7.09456		2014-09-05 12:04:00	7.30137		2015-02-11 11:45:00	4.49802		2014-10-12 21:13:00	10.0558
2014-12-16 08:19:00	7.09456		2014-09-05 13:04:00	7.29529		2015-02-11 11:55:00	4.49959		2014-10-12 22:13:00	10.0588
2014-12-16 08:29:00	7.09456		2014-09-05 14:04:00	7.29681		2015-02-11 12:05:00	4.50273		2014-10-12 23:13:00	10.0588
2014-12-16 08:39:00	7.09456		2014-09-05 15:04:00	7.29377		2015-02-11 12:15:00	4.50586		2014-10-13 00:13:00	10.0543
2014-12-16 08:49:00	7.09608		2014-09-05 16:04:00	7.29529		2015-02-11 12:25:00	4.50586		2014-10-13 01:13:00	10.0558
2014-12-16 08:59:00	7.09608		2014-09-05 17:04:00	7.29529		2015-02-11 12:35:00	4.509		2014-10-13 02:13:00	10.0528
2014-12-16 09:09:00	7.09608		2014-09-05 18:04:00	7.29529		2015-02-11 12:45:00	4.51214		2014-10-13 03:13:00	10.0558
2014-12-16 09:19:00	7.09456		2014-09-05 19:04:00	7.29529		2015-02-11 12:55:00	4.51371		2014-10-13 04:13:00	10.0588
2014-12-16 09:29:00	7.09608		2014-09-05 20:04:00	7.29529		2015-02-11 13:05:00	4.51528		2014-10-13 05:13:00	10.0602
2014-12-16 09:39:00	7.09456		2014-09-05 21:04:00	7.29833		2015-02-11 13:15:00	4.51528		2014-10-13 06:13:00	10.0617
2014-12-16 09:49:00	7.09456		2014-09-05 22:04:00	7.29681		2015-02-11 13:25:00	4.51685		2014-10-13 07:13:00	10.0617
2014-12-16 09:59:00	7.09456		2014-09-05 23:04:00	7.29833		2015-02-11 13:35:00	4.51842		2014-10-13 08:13:00	10.0558
2014-12-16 10:09:00	7.09456		2014-09-06 00:04:00	7.29681		2015-02-11 13:45:00	4.51842		2014-10-13 09:13:00	10.0588
2014-12-16 10:19:00	7.09456		2014-09-06 01:04:00	7.29681		2015-02-11 13:55:00	4.52312		2014-10-13 10:13:00	10.0602
2014-12-16 10:29:00	7.09456		2014-09-06 02:04:00	7.29681		2015-02-11 14:05:00	4.52469		2014-10-13 11:13:00	10.0558
2014-12-16 10:39:00	7.09608		2014-09-06 03:04:00	7.29985		2015-02-11 14:15:00	4.52312		2014-10-13 12:13:00	10.0602
2014-12-16 10:49:00	7.09608		2014-09-06 04:04:00	7.29529		2015-02-11 14:25:00	4.52312		2014-10-13 13:13:00	10.0588
2014-12-16 10:59:00	7.09608		2014-09-06 05:04:00	7.29529		2015-02-11 14:35:00	4.52469		2014-10-13 14:13:00	10.0677
2014-12-16 11:09:00	7.09608		2014-09-06 06:04:00	7.29529		2015-02-11 14:45:00	4.53096		2014-10-13 15:13:00	10.0662
2014-12-16 11:19:00	7.09608		2014-09-06 07:04:00	7.29681		2015-02-11 14:55:00	4.53253		2014-10-13 16:13:00	10.0677
2014-12-16 11:29:00	7.09608		2014-09-06 08:04:00	7.29681		2015-02-11 15:05:00	4.5341		2014-10-13 17:13:00	10.0677
2014-12-16 11:39:00	7.09608		2014-09-06 09:04:00	7.29985		2015-02-11 15:15:00	4.54037		2014-10-13 18:13:00	10.0662
2014-12-16 11:49:00	7.09608		2014-09-06 10:04:00	7.29681		2015-02-11 15:25:00	4.54194		2014-10-13 19:13:00	10.0647
2014-12-16 11:59:00	7.09608		2014-09-06 11:04:00	7.29073		2015-02-11 15:35:00	4.54194		2014-10-13 20:13:00	10.0632
2014-12-16 12:09:00	7.09608		2014-09-06 12:04:00	7.29377		2015-02-11 15:45:00	4.53881		2014-10-13 21:13:00	10.0617
2014-12-16 12:19:00	7.09608		2014-09-06 13:04:00	7.29681		2015-02-11 15:55:00	4.53567		2014-10-13 22:13:00	10.0602
2014-12-16 12:29:00	7.0976		2014-09-06 14:04:00	7.29529		2015-02-11 16:05:00	4.5341		2014-10-13 23:13:00	10.0632
2014-12-16 12:39:00	7.09608		2014-09-06 15:04:00	7.29529		2015-02-11 16:15:00	4.53096		2014-10-14 00:13:00	10.0558
2014-12-16 12:49:00	7.09608		2014-09-06 16:04:00	7.29681		2015-02-11 16:25:00	4.53253		2014-10-14 01:13:00	10.0573
2014-12-16 12:59:00	7.09608		2014-09-06 17:04:00	7.29377		2015-02-11 16:35:00	4.5341		2014-10-14 02:13:00	10.0588
2014-12-16 13:09:00	7.09608		2014-09-06 18:04:00	7.29529		2015-02-11 16:45:00	4.53253		2014-10-14 03:13:00	10.0573
2014-12-16 13:19:00	7.09608		2014-09-06 19:04:00	7.29377		2015-02-11 16:55:00	4.53253		2014-10-14 04:13:00	10.0543
2014-12-16 13:29:00	7.09608		2014-09-06 20:04:00	7.29377		2015-02-11 17:05:00	4.52783		2014-10-14 05:13:00	10.0543
2014-12-16 13:39:00	7.0976		2014-09-06 21:04:00	7.29529		2015-02-11 17:15:00	4.53096		2014-10-14 06:13:00	10.0558
2014-12-16 13:49:00	7.0976		2014-09-06 22:04:00	7.29377		2015-02-11 17:25:00	4.5294		2014-10-14 07:13:00	10.0573
2014-12-16 13:59:00	7.0976		2014-09-06 23:04:00	7.29985		2015-02-11 17:35:00	4.52783		2014-10-14 08:13:00	10.0543
2014-12-16 14:09:00	7.0976		2014-09-07 00:04:00	7.29529		2015-02-11 17:45:00	4.52312		2014-10-14 09:13:00	10.0558
2014-12-16 14:19:00	7.09456		2014-09-07 01:04:00	7.29681		2015-02-11 17:55:00	4.52469		2014-10-14 10:13:00	10.0558
2014-12-16 14:29:00	7.09913		2014-09-07 02:04:00	7.29681		2015-02-11 18:05:00	4.52155		2014-10-14 11:13:00	10.0528
2014-12-16 14:39:00	7.09913		2014-09-07 03:04:00	7.29529		2015-02-11 18:15:00	4.51842		2014-10-14 12:13:00	10.0543
2014-12-16 14:49:00	7.0976		2014-09-07 04:04:00	7.29681		2015-02-11 18:25:00	4.51998		2014-10-14 13:13:00	10.0602
2014-12-16 14:59:00	7.0976		2014-09-07 05:04:00	7.29833		2015-02-11 18:35:00	4.51371		2014-10-14 14:13:00	10.0588
2014-12-16 15:09:00	7.0976		2014-09-07 06:04:00	7.29681		2015-02-11 18:45:00	4.51842		2014-10-14 15:13:00	10.0677
2014-12-16 15:19:00	7.09913		2014-09-07 07:04:00	7.29985		2015-02-11 18:55:00	4.51685		2014-10-14 16:13:00	10.0662
2014-12-16 15:29:00	7.0976		2014-09-07 08:04:00	7.29529		2015-02-11 19:05:00	4.51214		2014-10-14 17:13:00	10.0662
2014-12-16 15:39:00	7.09913		2014-09-07 09:04:00	7.29681		2015-02-11 19:15:00	4.50743		2014-10-14 18:13:00	10.0692
2014-12-16 15:49:00	7.0976		2014-09-07 10:04:00	7.29985		2015-02-11 19:25:00	4.50743		2014-10-14 19:13:00	10.0677
2014-12-16 15:59:00	7.09913		2014-09-07 11:04:00	7.29833		2015-02-11 19:35:00	4.50586		2014-10-14 20:13:00	10.0588
2014-12-16 16:09:00	7.09913		2014-09-07 12:04:00	7.30137		2015-02-11 19:45:00	4.50273		2014-10-14 21:13:00	10.0588
2014-12-16 16:19:00	7.09913		2014-09-07 13:04:00	7.30137		2015-02-11 19:55:00	4.50116		2014-10-14 22:13:00	10.0573
2014-12-16 16:29:00	7.09913		2014-09-07 14:04:00	7.30137		2015-02-11 20:05:00	4.49959		2014-10-14 23:13:00	10.0573
2014-12-16 16:39:00	7.09913		2014-09-07 15:04:00	7.29833		2015-02-11 20:15:00	4.49488		2014-10-15 00:13:00	10.0588
2014-12-16 16:49:00	7.09913		2014-09-07 16:04:00	7.29985		2015-02-11 20:25:00	4.49174		2014-10-15 01:13:00	10.0573
2014-12-16 16:59:00	7.09913		2014-09-07 17:04:00	7.29985		2015-02-11 20:35:00	4.49331		2014-10-15 02:13:00	10.0543
2014-12-16 17:09:00	7.0976		2014-09-07 18:04:00	7.30288		2015-02-11 20:45:00	4.49331		2014-10-15 03:13:00	10.0588
2014-12-16 17:19:00	7.0976		2014-09-07 19:04:00	7.30288		2015-02-11 20:55:00	4.49331		2014-10-15 04:13:00	10.0558
2014-12-16 17:29:00	7.09608		2014-09-07 20:04:00	7.30288		2015-02-11 21:05:00	4.49645		2014-10-15 05:13:00	10.0558
2014-12-16 17:39:00	7.09608		2014-09-07 21:04:00	7.30137		2015-02-11 21:15:00	4.49331		2014-10-15 06:13:00	10.0543
2014-12-16 17:49:00	7.09608		2014-09-07 22:04:00	7.29833		2015-02-11 21:25:00	4.49174		2014-10-15 07:13:00	10.0573
2014-12-16 17:59:00	7.09608		2014-09-07 23:04:00	7.30744		2015-02-11 21:35:00	4.4886		2014-10-15 08:13:00	10.0573
2014-12-16 18:09:00	7.09608		2014-09-08 00:04:00	7.29985		2015-02-11 21:45:00	4.48703		2014-10-15 09:13:00	10.0558
2014-12-16 18:19:00	7.09456		2014-09-08 01:04:00	7.29985		2015-02-11 21:55:00	4.48547		2014-10-15 10:13:00	10.0543
2014-12-16 18:29:00	7.09608		2014-09-08 02:04:00	7.30288		2015-02-11 22:05:00	4.48076		2014-10-15 11:13:00	10.0602
2014-12-16 18:39:00	7.09608		2014-09-08 03:04:00	7.30288		2015-02-11 22:15:00	4.47762		2014-10-15 12:13:00	10.0588
2014-12-16 18:49:00	7.09608		2014-09-08 04:04:00	7.29985		2015-02-11 22:25:00	4.47134		2014-10-15 13:13:00	10.0602
2014-12-16 18:59:00	7.09608		2014-09-08 05:04:00	7.30288		2015-02-11 22:35:00	4.46663		2014-10-15 14:13:00	10.0662
2014-12-16 19:09:00	7.09608		2014-09-08 06:04:00	7.30137		2015-02-11 22:45:00	4.46506		2014-10-15 15:13:00	10.0647
2014-12-16 19:19:00	7.09608		2014-09-08 07:04:00	7.30744		2015-02-11 22:55:00	4.46192		2014-10-15 16:13:00	10.0617
2014-12-16 19:29:00	7.09608		2014-09-08 08:04:00	7.30288		2015-02-11 23:05:00	4.46192		2014-10-15 17:13:00	10.0602
2014-12-16 19:39:00	7.09608		2014-09-08 09:04:00	7.30137		2015-02-11 23:15:00	4.45878		2014-10-15 18:13:00	10.0632
2014-12-16 19:49:00	7.09608		2014-09-08 10:04:00	7.30288		2015-02-11 23:25:00	4.45407		2014-10-15 19:13:00	10.0662
2014-12-16 19:59:00	7.0976		2014-09-08 11:04:00	7.3044		2015-02-11 23:35:00	4.45407		2014-10-15 20:13:00	10.0602
2014-12-16 20:09:00	7.0976		2014-09-08 12:04:00	7.30137		2015-02-11 23:45:00	4.4525		2014-10-15 21:13:00	10.0573
2014-12-16 20:19:00	7.09608		2014-09-08 13:04:00	7.30288		2015-02-11 23:55:00	4.44936		2014-10-15 22:13:00	10.0647
2014-12-16 20:29:00	7.0976		2014-09-08 14:04:00	7.30288		2015-02-12 00:05:00	4.44779		2014-10-15 23:13:00	10.0543
2014-12-16 20:39:00	7.09608		2014-09-08 15:04:00	7.3044		2015-02-12 00:15:00	4.44936		2014-10-16 00:13:00	10.0588
2014-12-16 20:49:00	7.09608		2014-09-08 16:04:00	7.30288		2015-02-12 00:25:00	4.44151		2014-10-16 01:13:00	10.0528
2014-12-16 20:59:00	7.09608		2014-09-08 17:04:00	7.3044		2015-02-12 00:35:00	4.43994		2014-10-16 02:13:00	10.0543
2014-12-16 21:09:00	7.09608		2014-09-08 18:04:00	7.30137		2015-02-12 00:45:00	4.43837		2014-10-16 03:13:00	10.0558
2014-12-16 21:19:00	7.09456		2014-09-08 19:04:00	7.30592		2015-02-12 00:55:00	4.43523		2014-10-16 04:13:00	10.0514
2014-12-16 21:29:00	7.09456		2014-09-08 20:04:00	7.3044		2015-02-12 01:05:00	4.43366		2014-10-16 05:13:00	10.0543
2014-12-16 21:39:00	7.09456		2014-09-08 21:04:00	7.30592		2015-02-12 01:15:00	4.43209		2014-10-16 06:13:00	10.0543
2014-12-16 21:49:00	7.09456		2014-09-08 22:04:00	7.30744		2015-02-12 01:25:00	4.43052		2014-10-16 07:13:00	10.0543
2014-12-16 21:59:00	7.09456		2014-09-08 23:04:00	7.30288		2015-02-12 01:35:00	4.42738		2014-10-16 08:13:00	10.0543
2014-12-16 22:09:00	7.09456		2014-09-09 00:04:00	7.30288		2015-02-12 01:45:00	4.42266		2014-10-16 09:13:00	10.0558
2014-12-16 22:19:00	7.09608		2014-09-09 01:04:00	7.30288		2015-02-12 01:55:00	4.42738		2014-10-16 10:13:00	10.0602
2014-12-16 22:29:00	7.09608		2014-09-09 02:04:00	7.30137		2015-02-12 02:05:00	4.42266		2014-10-16 11:13:00	10.0573
2014-12-16 22:39:00	7.09456		2014-09-09 03:04:00	7.30288		2015-02-12 02:15:00	4.42109		2014-10-16 12:13:00	10.0573
2014-12-16 22:49:00	7.09456		2014-09-09 04:04:00	7.30288		2015-02-12 02:25:00	4.41638		2014-10-16 13:13:00	10.0558
2014-12-16 22:59:00	7.09456		2014-09-09 05:04:00	7.30288		2015-02-12 02:35:00	4.41481		2014-10-16 14:13:00	10.0602
2014-12-16 23:09:00	7.09456		2014-09-09 06:04:00	7.29985		2015-02-12 02:45:00	4.41324		2014-10-16 15:13:00	10.0588
2014-12-16 23:19:00	7.09456		2014-09-09 07:04:00	7.29681		2015-02-12 02:55:00	4.4101		2014-10-16 16:13:00	10.0588
2014-12-16 23:29:00	7.09456		2014-09-09 08:04:00	7.3044		2015-02-12 03:05:00	4.40853		2014-10-16 17:13:00	10.0617
2014-12-16 23:39:00	7.09456		2014-09-09 09:04:00	7.30137		2015-02-12 03:15:00	4.40538		2014-10-16 18:13:00	10.0588
2014-12-16 23:49:00	7.09456		2014-09-09 10:04:00	7.30137		2015-02-12 03:25:00	4.40538		2014-10-16 19:13:00	10.0573
2014-12-16 23:59:00	7.09456		2014-09-09 11:04:00	7.30744		2015-02-12 03:35:00	4.40381		2014-10-16 20:13:00	10.0588
2014-12-17 00:09:00	7.09456		2014-09-09 12:04:00	7.30288		2015-02-12 03:45:00	4.40381		2014-10-16 21:13:00	10.0558
2014-12-17 00:19:00	7.09456		2014-09-09 13:04:00	7.30592		2015-02-12 03:55:00	4.40538		2014-10-16 22:13:00	10.0573
2014-12-17 00:29:00	7.09456		2014-09-09 14:04:00	7.29985		2015-02-12 04:05:00	4.40381		2014-10-16 23:13:00	10.0573
2014-12-17 00:39:00	7.09304		2014-09-09 15:04:00	7.3044		2015-02-12 04:15:00	4.40853		2014-10-17 00:13:00	10.0573
2014-12-17 00:49:00	7.09304		2014-09-09 16:04:00	7.29985		2015-02-12 04:25:00	4.4101		2014-10-17 01:13:00	10.0558
2014-12-17 00:59:00	7.09304		2014-09-09 17:04:00	7.3044		2015-02-12 04:35:00	4.40853		2014-10-17 02:13:00	10.0602
2014-12-17 01:09:00	7.09304		2014-09-09 18:04:00	7.30288		2015-02-12 04:45:00	4.40853		2014-10-17 03:13:00	10.0588
2014-12-17 01:19:00	7.09304		2014-09-09 19:04:00	7.3044		2015-02-12 04:55:00	4.41167		2014-10-17 04:13:00	10.0573
2014-12-17 01:29:00	7.09304		2014-09-09 20:04:00	7.3044		2015-02-12 05:05:00	4.41481		2014-10-17 05:13:00	10.0573
2014-12-17 01:39:00	7.09304		2014-09-09 21:04:00	7.3044		2015-02-12 05:15:00	4.41638		2014-10-17 06:13:00	10.0558
2014-12-17 01:49:00	7.09152		2014-09-09 22:04:00	7.30592		2015-02-12 05:25:00	4.42109		2014-10-17 07:13:00	10.0543
2014-12-17 01:59:00	7.09152		2014-09-09 23:04:00	7.3044		2015-02-12 05:35:00	4.42109		2014-10-17 08:13:00	10.0558
2014-12-17 02:09:00	7.08999		2014-09-10 00:04:00	7.30592		2015-02-12 05:45:00	4.42266		2014-10-17 09:13:00	10.0573
2014-12-17 02:19:00	7.09152		2014-09-10 01:04:00	7.3044		2015-02-12 05:55:00	4.42423		2014-10-17 10:13:00	10.0558
2014-12-17 02:29:00	7.08999		2014-09-10 02:04:00	7.30592		2015-02-12 06:05:00	4.42738		2014-10-17 11:13:00	10.0558
2014-12-17 02:39:00	7.09152		2014-09-10 03:04:00	7.30592		2015-02-12 06:15:00	4.42581		2014-10-17 12:13:00	10.0543
2014-12-17 02:49:00	7.09152		2014-09-10 04:04:00	7.30592		2015-02-12 06:25:00	4.42423		2014-10-17 13:13:00	10.0543
2014-12-17 02:59:00	7.08999		2014-09-10 05:04:00	7.3044		2015-02-12 06:35:00	4.42738		2014-10-17 14:13:00	10.0588
2014-12-17 03:09:00	7.09152		2014-09-10 06:04:00	7.30592		2015-02-12 06:45:00	4.43052		2014-10-17 15:13:00	10.0558
2014-12-17 03:19:00	7.09152		2014-09-10 07:04:00	7.30744		2015-02-12 06:55:00	4.43052		2014-10-17 16:13:00	10.0573
2014-12-17 03:29:00	7.09152		2014-09-10 08:04:00	7.30592		2015-02-12 07:05:00	4.43052		2014-10-17 17:13:00	10.0558
2014-12-17 03:39:00	7.09152		2014-09-10 09:04:00	7.30137		2015-02-12 07:15:00	4.43209		2014-10-17 18:13:00	10.0543
2014-12-17 03:49:00	7.09152		2014-09-10 10:04:00	7.3044		2015-02-12 07:25:00	4.43209		2014-10-17 19:13:00	10.0543
2014-12-17 03:59:00	7.09152		2014-09-10 11:04:00	7.30896		2015-02-12 07:35:00	4.43209		2014-10-17 20:13:00	10.0602
2014-12-17 04:09:00	7.09152		2014-09-10 12:04:00	7.30896		2015-02-12 07:45:00	4.43209		2014-10-17 21:13:00	10.0558
2014-12-17 04:19:00	7.08999		2014-09-10 13:04:00	7.30288		2015-02-12 07:55:00	4.43523		2014-10-17 22:13:00	10.0588
2014-12-17 04:29:00	7.09152		2014-09-10 14:04:00	7.30288		2015-02-12 08:05:00	4.43523		2014-10-17 23:13:00	10.0573
2014-12-17 04:39:00	7.08999		2014-09-10 15:04:00	7.30137		2015-02-12 08:15:00	4.4368		2014-10-18 00:13:00	10.0602
2014-12-17 04:49:00	7.08999		2014-09-10 16:04:00	7.30288		2015-02-12 08:25:00	4.43837		2014-10-18 01:13:00	10.0602
2014-12-17 04:59:00	7.09152		2014-09-10 17:04:00	7.30137		2015-02-12 08:35:00	4.43523		2014-10-18 02:13:00	10.0588
2014-12-17 05:09:00	7.09152		2014-09-10 18:04:00	7.3044		2015-02-12 08:45:00	4.4368		2014-10-18 03:13:00	10.0543
2014-12-17 05:19:00	7.09152		2014-09-10 19:04:00	7.30744		2015-02-12 08:55:00	4.43523		2014-10-18 04:13:00	10.0573
2014-12-17 05:29:00	7.09152		2014-09-10 20:04:00	7.30744		2015-02-12 09:05:00	4.43837		2014-10-18 05:13:00	10.0543
2014-12-17 05:39:00	7.09152		2014-09-10 21:04:00	7.31048		2015-02-12 09:15:00	4.44151		2014-10-18 06:13:00	10.0558
2014-12-17 05:49:00	7.09152		2014-09-10 22:04:00	7.3044		2015-02-12 09:25:00	4.43994		2014-10-18 07:13:00	10.0573
2014-12-17 05:59:00	7.08999		2014-09-10 23:04:00	7.3044		2015-02-12 09:35:00	4.44308		2014-10-18 08:13:00	10.0573
2014-12-17 06:09:00	7.09152		2014-09-11 00:04:00	7.30592		2015-02-12 09:45:00	4.44308		2014-10-18 09:13:00	10.0602
2014-12-17 06:19:00	7.09304		2014-09-11 01:04:00	7.30592		2015-02-12 09:55:00	4.44622		2014-10-18 10:13:00	10.0558
2014-12-17 06:29:00	7.09304		2014-09-11 02:04:00	7.30592		2015-02-12 10:05:00	4.45093		2014-10-18 11:13:00	10.0602
2014-12-17 06:39:00	7.09152		2014-09-11 03:04:00	7.30592		2015-02-12 10:15:00	4.45564		2014-10-18 12:13:00	10.0588
2014-12-17 06:49:00	7.09304		2014-09-11 04:04:00	7.30592		2015-02-12 10:25:00	4.45721		2014-10-18 13:13:00	10.0573
2014-12-17 06:59:00	7.09304		2014-09-11 05:04:00	7.30744		2015-02-12 10:35:00	4.46192		2014-10-18 14:13:00	10.0588
2014-12-17 07:09:00	7.09304		2014-09-11 06:04:00	7.30288		2015-02-12 10:45:00	4.46192		2014-10-18 15:13:00	10.0588
2014-12-17 07:19:00	7.09304		2014-09-11 07:04:00	7.3044		2015-02-12 10:55:00	4.46349		2014-10-18 16:13:00	10.0602
2014-12-17 07:29:00	7.09304		2014-09-11 08:04:00	7.3044		2015-02-12 11:05:00	4.46663		2014-10-18 17:13:00	10.0602
2014-12-17 07:39:00	7.09304		2014-09-11 09:04:00	7.30744		2015-02-12 11:15:00	4.46977		2014-10-18 18:13:00	10.0573
2014-12-17 07:49:00	7.09304		2014-09-11 10:04:00	7.30592		2015-02-12 11:25:00	4.46977		2014-10-18 19:13:00	10.0588
2014-12-17 07:59:00	7.09456		2014-09-11 11:04:00	7.30592		2015-02-12 11:35:00	4.46977		2014-10-18 20:13:00	10.0588
2014-12-17 08:09:00	7.09304		2014-09-11 12:04:00	7.3044		2015-02-12 11:45:00	4.47291		2014-10-18 21:13:00	10.0588
2014-12-17 08:19:00	7.09304		2014-09-11 13:04:00	7.3044		2015-02-12 11:55:00	4.47762		2014-10-18 22:13:00	10.0573
2014-12-17 08:29:00	7.09304		2014-09-11 14:04:00	7.30592		2015-02-12 12:05:00	4.47919		2014-10-18 23:13:00	10.0558
2014-12-17 08:39:00	7.09304		2014-09-11 15:04:00	7.30592		2015-02-12 12:15:00	4.48076		2014-10-19 00:13:00	10.0543
2014-12-17 08:49:00	7.09304		2014-09-11 16:04:00	7.30592		2015-02-12 12:25:00	4.48233		2014-10-19 01:13:00	10.0558
2014-12-17 08:59:00	7.09152		2014-09-11 17:04:00	7.30288		2015-02-12 12:35:00	4.48547		2014-10-19 02:13:00	10.0617
2014-12-17 09:09:00	7.09304		2014-09-11 18:04:00	7.30592		2015-02-12 12:45:00	4.4886		2014-10-19 03:13:00	10.0632
2014-12-17 09:19:00	7.09456		2014-09-11 19:04:00	7.30592		2015-02-12 12:55:00	4.49174		2014-10-19 04:13:00	10.0602
2014-12-17 09:29:00	7.09456		2014-09-11 20:04:00	7.30592		2015-02-12 13:05:00	4.49488		2014-10-19 05:13:00	10.0558
2014-12-17 09:39:00	7.09456		2014-09-11 21:04:00	7.30896		2015-02-12 13:15:00	4.49645		2014-10-19 06:13:00	10.0543
2014-12-17 09:49:00	7.09456		2014-09-11 22:04:00	7.3044		2015-02-12 13:25:00	4.50116		2014-10-19 07:13:00	10.0617
2014-12-17 09:59:00	7.09304		2014-09-11 23:04:00	7.30896		2015-02-12 13:35:00	4.50273		2014-10-19 08:13:00	10.0677
2014-12-17 10:09:00	7.09304		2014-09-12 00:04:00	7.3044		2015-02-12 13:45:00	4.50586		2014-10-19 09:13:00	10.0721
2014-12-17 10:19:00	7.09304		2014-09-12 01:04:00	7.3044		2015-02-12 13:55:00	4.51057		2014-10-19 10:13:00	10.0706
2014-12-17 10:29:00	7.09304		2014-09-12 02:04:00	7.30744		2015-02-12 14:05:00	4.51214		2014-10-19 11:13:00	10.0543
2014-12-17 10:39:00	7.09456		2014-09-12 03:04:00	7.3044		2015-02-12 14:15:00	4.51528		2014-10-19 12:13:00	10.0647
2014-12-17 10:49:00	7.09456		2014-09-12 04:04:00	7.30288		2015-02-12 14:25:00	4.51685		2014-10-19 13:13:00	10.0528
2014-12-17 10:59:00	7.09304		2014-09-12 05:04:00	7.30896		2015-02-12 14:35:00	4.51842		2014-10-19 14:13:00	10.0558
2014-12-17 11:09:00	7.09304		2014-09-12 06:04:00	7.30592		2015-02-12 14:45:00	4.52155		2014-10-19 15:13:00	10.0514
2014-12-17 11:19:00	7.09456		2014-09-12 07:04:00	7.3044		2015-02-12 14:55:00	4.52469		2014-10-19 16:13:00	10.0528
2014-12-17 11:29:00	7.09304		2014-09-12 08:04:00	7.30896		2015-02-12 15:05:00	4.52626		2014-10-19 17:13:00	10.0528
2014-12-17 11:39:00	7.09304		2014-09-12 09:04:00	7.30592		2015-02-12 15:15:00	4.5294		2014-10-19 18:13:00	10.0528
2014-12-17 11:49:00	7.09304		2014-09-12 10:04:00	7.30896		2015-02-12 15:25:00	4.53253		2014-10-19 19:13:00	10.0588
2014-12-17 11:59:00	7.09304		2014-09-12 11:04:00	7.31048		2015-02-12 15:35:00	4.53567		2014-10-19 20:13:00	10.0528
2014-12-17 12:09:00	7.09304		2014-09-12 12:04:00	7.30592		2015-02-12 15:45:00	4.53724		2014-10-19 21:13:00	10.0514
2014-12-17 12:19:00	7.09152		2014-09-12 13:04:00	7.30744		2015-02-12 15:55:00	4.53881		2014-10-19 22:13:00	10.0573
2014-12-17 12:29:00	7.09152		2014-09-12 14:04:00	7.30896		2015-02-12 16:05:00	4.54037		2014-10-19 23:13:00	10.0528
2014-12-17 12:39:00	7.08999		2014-09-12 15:04:00	7.30592		2015-02-12 16:15:00	4.54037		2014-10-20 00:13:00	10.0558
2014-12-17 12:49:00	7.08999		2014-09-12 16:04:00	7.30592		2015-02-12 16:25:00	4.54194		2014-10-20 01:13:00	10.0514
2014-12-17 12:59:00	7.09152		2014-09-12 17:04:00	7.30744		2015-02-12 16:35:00	4.54508		2014-10-20 02:13:00	10.0543
2014-12-17 13:09:00	7.09152		2014-09-12 18:04:00	7.30896		2015-02-12 16:45:00	4.54665		2014-10-20 03:13:00	10.0528
2014-12-17 13:19:00	7.08999		2014-09-12 19:04:00	7.30592		2015-02-12 16:55:00	4.54822		2014-10-20 04:13:00	10.0528
2014-12-17 13:29:00	7.09152		2014-09-12 20:04:00	7.30744		2015-02-12 17:05:00	4.54822		2014-10-20 05:13:00	10.0514
2014-12-17 13:39:00	7.08999		2014-09-12 21:04:00	7.312		2015-02-12 17:15:00	4.54665		2014-10-20 06:13:00	10.0514
2014-12-17 13:49:00	7.08999		2014-09-12 22:04:00	7.30592		2015-02-12 17:25:00	4.54665		2014-10-20 07:13:00	10.0573
2014-12-17 13:59:00	7.08999		2014-09-12 23:04:00	7.30896		2015-02-12 17:35:00	4.54351		2014-10-20 08:13:00	10.0617
2014-12-17 14:09:00	7.08847		2014-09-13 00:04:00	7.30592		2015-02-12 17:45:00	4.54351		2014-10-20 09:13:00	10.0617
2014-12-17 14:19:00	7.08999		2014-09-13 01:04:00	7.31048		2015-02-12 17:55:00	4.54194		2014-10-20 10:13:00	10.0662
2014-12-17 14:29:00	7.08999		2014-09-13 02:04:00	7.30896		2015-02-12 18:05:00	4.54194		2014-10-20 11:13:00	10.0588
2014-12-17 14:39:00	7.08999		2014-09-13 03:04:00	7.30744		2015-02-12 18:15:00	4.54037		2014-10-20 12:13:00	10.0573
2014-12-17 14:49:00	7.08999		2014-09-13 04:04:00	7.3044		2015-02-12 18:25:00	4.54037		2014-10-20 13:13:00	10.0602
2014-12-17 14:59:00	7.09152		2014-09-13 05:04:00	7.31048		2015-02-12 18:35:00	4.53881		2014-10-20 14:13:00	10.0588
2014-12-17 15:09:00	7.09304		2014-09-13 06:04:00	7.30592		2015-02-12 18:45:00	4.53881		2014-10-20 15:13:00	10.0543
2014-12-17 15:19:00	7.09152		2014-09-13 07:04:00	7.31048		2015-02-12 18:55:00	4.53881		2014-10-20 16:13:00	10.0543
2014-12-17 15:29:00	7.09152		2014-09-13 08:04:00	7.30744		2015-02-12 19:05:00	4.54037		2014-10-20 17:13:00	10.0573
2014-12-17 15:39:00	7.09304		2014-09-13 09:04:00	7.30896		2015-02-12 19:15:00	4.54194		2014-10-20 18:13:00	10.0573
2014-12-17 15:49:00	7.09304		2014-09-13 10:04:00	7.30896		2015-02-12 19:25:00	4.54194		2014-10-20 19:13:00	10.0588
2014-12-17 15:59:00	7.09304		2014-09-13 11:04:00	7.30744		2015-02-12 19:35:00	4.53881		2014-10-20 20:13:00	10.0543
2014-12-17 16:09:00	7.09304		2014-09-13 12:04:00	7.30744		2015-02-12 19:45:00	4.53724		2014-10-20 21:13:00	10.0528
2014-12-17 16:19:00	7.09304		2014-09-13 13:04:00	7.31048		2015-02-12 19:55:00	4.53724		2014-10-20 22:13:00	10.0588
2014-12-17 16:29:00	7.08999		2014-09-13 14:04:00	7.30744		2015-02-12 20:05:00	4.53567		2014-10-20 23:13:00	10.0558
2014-12-17 16:39:00	7.09304		2014-09-13 15:04:00	7.30896		2015-02-12 20:15:00	4.53567		2014-10-21 00:13:00	10.0543
2014-12-17 16:49:00	7.09304		2014-09-13 16:04:00	7.30744		2015-02-12 20:25:00	4.5341		2014-10-21 01:13:00	10.0514
2014-12-17 16:59:00	7.09456		2014-09-13 17:04:00	7.30744		2015-02-12 20:35:00	4.53567		2014-10-21 02:13:00	10.0543
2014-12-17 17:09:00	7.09456		2014-09-13 18:04:00	7.30744		2015-02-12 20:45:00	4.53567		2014-10-21 03:13:00	10.0528
2014-12-17 17:19:00	7.09304		2014-09-13 19:04:00	7.30744		2015-02-12 20:55:00	4.53567		2014-10-21 04:13:00	10.0558
2014-12-17 17:29:00	7.09304		2014-09-13 20:04:00	7.30896		2015-02-12 21:05:00	4.5341		2014-10-21 05:13:00	10.0514
2014-12-17 17:39:00	7.09304		2014-09-13 21:04:00	7.30896		2015-02-12 21:15:00	4.53567		2014-10-21 06:13:00	10.0514
2014-12-17 17:49:00	7.09304		2014-09-13 22:04:00	7.30896		2015-02-12 21:25:00	4.53724		2014-10-21 07:13:00	10.0514
2014-12-17 17:59:00	7.09304		2014-09-13 23:04:00	7.30896		2015-02-12 21:35:00	4.53567		2014-10-21 08:13:00	10.0528
2014-12-17 18:09:00	7.09304		2014-09-14 00:04:00	7.30896		2015-02-12 21:45:00	4.53567		2014-10-21 09:13:00	10.0484
2014-12-17 18:19:00	7.09456		2014-09-14 01:04:00	7.3044		2015-02-12 21:55:00	4.53567		2014-10-21 10:13:00	10.0514
2014-12-17 18:29:00	7.09456		2014-09-14 02:04:00	7.30592		2015-02-12 22:05:00	4.5341		2014-10-21 11:13:00	10.0514
2014-12-17 18:39:00	7.09456		2014-09-14 03:04:00	7.31048		2015-02-12 22:15:00	4.53567		2014-10-21 12:13:00	10.0558
2014-12-17 18:49:00	7.09304		2014-09-14 04:04:00	7.30744		2015-02-12 22:25:00	4.53567		2014-10-21 13:13:00	10.0558
2014-12-17 18:59:00	7.09304		2014-09-14 05:04:00	7.30744		2015-02-12 22:35:00	4.53567		2014-10-21 14:13:00	10.0528
2014-12-17 19:09:00	7.09304		2014-09-14 06:04:00	7.312		2015-02-12 22:45:00	4.53567		2014-10-21 15:13:00	10.0573
2014-12-17 19:19:00	7.09304		2014-09-14 07:04:00	7.30896		2015-02-12 22:55:00	4.53567		2014-10-21 16:13:00	10.0558
2014-12-17 19:29:00	7.09456		2014-09-14 08:04:00	7.30744		2015-02-12 23:05:00	4.53567		2014-10-21 17:13:00	10.0573
2014-12-17 19:39:00	7.09456		2014-09-14 09:04:00	7.31048		2015-02-12 23:15:00	4.53724		2014-10-21 18:13:00	10.0573
2014-12-17 19:49:00	7.09456		2014-09-14 10:04:00	7.30896		2015-02-12 23:25:00	4.53724		2014-10-21 19:13:00	10.0573
2014-12-17 19:59:00	7.09456		2014-09-14 11:04:00	7.312		2015-02-12 23:35:00	4.53567		2014-10-21 20:13:00	10.0543
2014-12-17 20:09:00	7.09304		2014-09-14 12:04:00	7.30896		2015-02-12 23:45:00	4.5341		2014-10-21 21:13:00	10.0588
2014-12-17 20:19:00	7.09304		2014-09-14 13:04:00	7.30592		2015-02-12 23:55:00	4.53567		2014-10-21 22:13:00	10.0543
2014-12-17 20:29:00	7.09304		2014-09-14 14:04:00	7.30896		2015-02-13 00:05:00	4.53567		2014-10-21 23:13:00	10.0528
2014-12-17 20:39:00	7.09304		2014-09-14 15:04:00	7.30744		2015-02-13 00:15:00	4.53567		2014-10-22 00:13:00	10.0514
2014-12-17 20:49:00	7.09456		2014-09-14 16:04:00	7.30744		2015-02-13 00:25:00	4.53567		2014-10-22 01:13:00	10.0543
2014-12-17 20:59:00	7.09456		2014-09-14 17:04:00	7.312		2015-02-13 00:35:00	4.53881		2014-10-22 02:13:00	10.0514
2014-12-17 21:09:00	7.09456		2014-09-14 18:04:00	7.31048		2015-02-13 00:45:00	4.53567		2014-10-22 03:13:00	10.0543
2014-12-17 21:19:00	7.09456		2014-09-14 19:04:00	7.30592		2015-02-13 00:55:00	4.5341		2014-10-22 04:13:00	10.0543
2014-12-17 21:29:00	7.09304		2014-09-14 20:04:00	7.30744		2015-02-13 01:05:00	4.53567		2014-10-22 05:13:00	10.0558
2014-12-17 21:39:00	7.09304		2014-09-14 21:04:00	7.30592		2015-02-13 01:15:00	4.53724		2014-10-22 06:13:00	10.0528
2014-12-17 21:49:00	7.09456		2014-09-14 22:04:00	7.31048		2015-02-13 01:25:00	4.53724		2014-10-22 07:13:00	10.0558
2014-12-17 21:59:00	7.09456		2014-09-14 23:04:00	7.30896		2015-02-13 01:35:00	4.53724		2014-10-22 08:13:00	10.0543
2014-12-17 22:09:00	7.09456		2014-09-15 00:04:00	7.31048		2015-02-13 01:45:00	4.54194		2014-10-22 09:13:00	10.0514
2014-12-17 22:19:00	7.09456		2014-09-15 01:04:00	7.30896		2015-02-13 01:55:00	4.54037		2014-10-22 10:13:00	10.0528
2014-12-17 22:29:00	7.09456		2014-09-15 02:04:00	7.28162		2015-02-13 02:05:00	4.54194		2014-10-22 11:13:00	10.0499
2014-12-17 22:39:00	7.09456		2014-09-15 03:04:00	7.29225		2015-02-13 02:15:00	4.54194		2014-10-22 12:13:00	10.0543
2014-12-17 22:49:00	7.09456		2014-09-15 04:04:00	7.29225		2015-02-13 02:25:00	4.54508		2014-10-22 13:13:00	10.0543
2014-12-17 22:59:00	7.09456		2014-09-15 05:04:00	7.30137		2015-02-13 02:35:00	4.54822		2014-10-22 14:13:00	10.0528
2014-12-17 23:09:00	7.09456		2014-09-15 06:04:00	7.29833		2015-02-13 02:45:00	4.54822		2014-10-22 15:13:00	10.0543
2014-12-17 23:19:00	7.09456		2014-09-15 07:04:00	7.29681		2015-02-13 02:55:00	4.54978		2014-10-22 16:13:00	10.0484
2014-12-17 23:29:00	7.09456		2014-09-15 08:04:00	7.29681		2015-02-13 03:05:00	4.54978		2014-10-22 17:13:00	10.0543
2014-12-17 23:39:00	7.09456		2014-09-15 09:04:00	7.30137		2015-02-13 03:15:00	4.54978		2014-10-22 18:13:00	10.0543
2014-12-17 23:49:00	7.09304		2014-09-15 10:04:00	7.30288		2015-02-13 03:25:00	4.55135		2014-10-22 19:13:00	10.0558
2014-12-17 23:59:00	7.09304		2014-09-15 11:04:00	7.30288		2015-02-13 03:35:00	4.55449		2014-10-22 20:13:00	10.0528
2014-12-18 00:09:00	7.09304		2014-09-15 12:04:00	7.30137		2015-02-13 03:45:00	4.55606		2014-10-22 21:13:00	10.0528
2014-12-18 00:19:00	7.09304		2014-09-15 13:04:00	7.29529		2015-02-13 03:55:00	4.55606		2014-10-22 22:13:00	10.0484
2014-12-18 00:29:00	7.09456		2014-09-15 14:04:00	7.29377		2015-02-13 04:05:00	4.55919		2014-10-22 23:13:00	10.0528
2014-12-18 00:39:00	7.09456		2014-09-15 15:04:00	7.29377		2015-02-13 04:15:00	4.56389		2014-10-23 00:13:00	10.0558
2014-12-18 00:49:00	7.09456		2014-09-15 16:04:00	7.29073		2015-02-13 04:25:00	4.56703		2014-10-23 01:13:00	10.0543
2014-12-18 00:59:00	7.09304		2014-09-15 17:04:00	7.29377		2015-02-13 04:35:00	4.5686		2014-10-23 02:13:00	10.0528
2014-12-18 01:09:00	7.09304		2014-09-15 18:04:00	7.29225		2015-02-13 04:45:00	4.5686		2014-10-23 03:13:00	10.0514
2014-12-18 01:19:00	7.09304		2014-09-15 19:04:00	7.29225		2015-02-13 04:55:00	4.57173		2014-10-23 04:13:00	10.0499
2014-12-18 01:29:00	7.09304		2014-09-15 20:04:00	7.29225		2015-02-13 05:05:00	4.57644		2014-10-23 05:13:00	10.0543
2014-12-18 01:39:00	7.09304		2014-09-15 21:04:00	7.29833		2015-02-13 05:15:00	4.57957		2014-10-23 06:13:00	10.0558
2014-12-18 01:49:00	7.09304		2014-09-15 22:04:00	7.30592		2015-02-13 05:25:00	4.57957		2014-10-23 07:13:00	10.0528
2014-12-18 01:59:00	7.09304		2014-09-15 23:04:00	7.30288		2015-02-13 05:35:00	4.58271		2014-10-23 08:13:00	10.0558
2014-12-18 02:09:00	7.09152		2014-09-16 00:04:00	7.30137		2015-02-13 05:45:00	4.58427		2014-10-23 09:13:00	10.0543
2014-12-18 02:19:00	7.09152		2014-09-16 01:04:00	7.29985		2015-02-13 05:55:00	4.58584		2014-10-23 10:13:00	10.0543
2014-12-18 02:29:00	7.09152		2014-09-16 02:04:00	7.29985		2015-02-13 06:05:00	4.58741		2014-10-23 11:13:00	10.0514
2014-12-18 02:39:00	7.09152		2014-09-16 03:04:00	7.29833		2015-02-13 06:15:00	4.58584		2014-10-23 12:13:00	10.0573
2014-12-18 02:49:00	7.09152		2014-09-16 04:04:00	7.29681		2015-02-13 06:25:00	4.58741		2014-10-23 13:13:00	10.0558
2014-12-18 02:59:00	7.09152		2014-09-16 05:04:00	7.29225		2015-02-13 06:35:00	4.58898		2014-10-23 14:13:00	10.0528
2014-12-18 03:09:00	7.09304		2014-09-16 06:04:00	7.29377		2015-02-13 06:45:00	4.58898		2014-10-23 15:13:00	10.0602
2014-12-18 03:19:00	7.09456		2014-09-16 07:04:00	7.29225		2015-02-13 06:55:00	4.58741		2014-10-23 16:13:00	10.0573
2014-12-18 03:29:00	7.09304		2014-09-16 08:04:00	7.29073		2015-02-13 07:05:00	4.58584		2014-10-23 17:13:00	10.0543
2014-12-18 03:39:00	7.09456		2014-09-16 09:04:00	7.28921		2015-02-13 07:15:00	4.58427		2014-10-23 18:13:00	10.0543
2014-12-18 03:49:00	7.09456		2014-09-16 10:04:00	7.28921		2015-02-13 07:25:00	4.58427		2014-10-23 19:13:00	10.0588
2014-12-18 03:59:00	7.09456		2014-09-16 11:04:00	7.28769		2015-02-13 07:35:00	4.58427		2014-10-23 20:13:00	10.0558
2014-12-18 04:09:00	7.09456		2014-09-16 12:04:00	7.28617		2015-02-13 07:45:00	4.58271		2014-10-23 21:13:00	10.0543
2014-12-18 04:19:00	7.09456		2014-09-16 13:04:00	7.28769		2015-02-13 07:55:00	4.58114		2014-10-23 22:13:00	10.0543
2014-12-18 04:29:00	7.09304		2014-09-16 14:04:00	7.28769		2015-02-13 08:05:00	4.58271		2014-10-23 23:13:00	10.0558
2014-12-18 04:39:00	7.09304		2014-09-16 15:04:00	7.28769		2015-02-13 08:15:00	4.58271		2014-10-24 00:13:00	10.0588
2014-12-18 04:49:00	7.09304		2014-09-16 16:04:00	7.28921		2015-02-13 08:25:00	4.58271		2014-10-24 01:13:00	10.0632
2014-12-18 04:59:00	7.09152		2014-09-16 17:04:00	7.28465		2015-02-13 08:35:00	4.58427		2014-10-24 02:13:00	10.0602
2014-12-18 05:09:00	7.09152		2014-09-16 18:04:00	7.29073		2015-02-13 08:45:00	4.58427		2014-10-24 03:13:00	10.0692
2014-12-18 05:19:00	7.09304		2014-09-16 19:04:00	7.29073		2015-02-13 08:55:00	4.58584		2014-10-24 04:13:00	10.0721
2014-12-18 05:29:00	7.09304		2014-09-16 20:04:00	7.29073		2015-02-13 09:05:00	4.58741		2014-10-24 05:13:00	10.0617
2014-12-18 05:39:00	7.09152		2014-09-16 21:04:00	7.28617		2015-02-13 09:15:00	4.59054		2014-10-24 06:13:00	10.0573
2014-12-18 05:49:00	7.09304		2014-09-16 22:04:00	7.28769		2015-02-13 09:25:00	4.59211		2014-10-24 07:13:00	10.0558
2014-12-18 05:59:00	7.09304		2014-09-16 23:04:00	7.28769		2015-02-13 09:35:00	4.59368		2014-10-24 08:13:00	10.0602
2014-12-18 06:09:00	7.09304		2014-09-17 00:04:00	7.28162		2015-02-13 09:45:00	4.59681		2014-10-24 09:13:00	10.0573
2014-12-18 06:19:00	7.09456		2014-09-17 01:04:00	7.29073		2015-02-13 09:55:00	4.59995		2014-10-24 10:13:00	10.0617
2014-12-18 06:29:00	7.09456		2014-09-17 02:04:00	7.28617		2015-02-13 10:05:00	4.60308		2014-10-24 11:13:00	10.0721
2014-12-18 06:39:00	7.09608		2014-09-17 03:04:00	7.28769		2015-02-13 10:15:00	4.60778		2014-10-24 12:13:00	10.0692
2014-12-18 06:49:00	7.09608		2014-09-17 04:04:00	7.28465		2015-02-13 10:25:00	4.60778		2014-10-24 13:13:00	10.0706
2014-12-18 06:59:00	7.09608		2014-09-17 05:04:00	7.28769		2015-02-13 10:35:00	4.61091		2014-10-24 14:13:00	10.0677
2014-12-18 07:09:00	7.09608		2014-09-17 06:04:00	7.28465		2015-02-13 10:45:00	4.61405		2014-10-24 15:13:00	10.0692
2014-12-18 07:19:00	7.09608		2014-09-17 07:04:00	7.28769		2015-02-13 10:55:00	4.61561		2014-10-24 16:13:00	10.0617
2014-12-18 07:29:00	7.09456		2014-09-17 08:04:00	7.28162		2015-02-13 11:05:00	4.61875		2014-10-24 17:13:00	10.0647
2014-12-18 07:39:00	7.09456		2014-09-17 09:04:00	7.28465		2015-02-13 11:15:00	4.62032		2014-10-24 18:13:00	10.0617
2014-12-18 07:49:00	7.09456		2014-09-17 10:04:00	7.28465		2015-02-13 11:25:00	4.62188		2014-10-24 19:13:00	10.0632
2014-12-18 07:59:00	7.09608		2014-09-17 11:04:00	7.28465		2015-02-13 11:35:00	4.62345		2014-10-24 20:13:00	10.0617
2014-12-18 08:09:00	7.09608		2014-09-17 12:04:00	7.28617		2015-02-13 11:45:00	4.62658		2014-10-24 21:13:00	10.0588
2014-12-18 08:19:00	7.09608		2014-09-17 13:04:00	7.28162		2015-02-13 11:55:00	4.62815		2014-10-24 22:13:00	10.0721
2014-12-18 08:29:00	7.09608		2014-09-17 14:04:00	7.28465		2015-02-13 12:05:00	4.63128		2014-10-24 23:13:00	10.0602
2014-12-18 08:39:00	7.09608		2014-09-17 15:04:00	7.28617		2015-02-13 12:15:00	4.63285		2014-10-25 00:13:00	10.0499
2014-12-18 08:49:00	7.0976		2014-09-17 16:04:00	7.28465		2015-02-13 12:25:00	4.63285		2014-10-25 01:13:00	10.0617
2014-12-18 08:59:00	7.0976		2014-09-17 17:04:00	7.28314		2015-02-13 12:35:00	4.63598		2014-10-25 02:13:00	10.0662
2014-12-18 09:09:00	7.0976		2014-09-17 18:04:00	7.2801		2015-02-13 12:45:00	4.63755		2014-10-25 03:13:00	10.0602
2014-12-18 09:19:00	7.0976		2014-09-17 19:04:00	7.2801		2015-02-13 12:55:00	4.64068		2014-10-25 04:13:00	10.0543
2014-12-18 09:29:00	7.09608		2014-09-17 20:04:00	7.27858		2015-02-13 13:05:00	4.64225		2014-10-25 05:13:00	10.0588
2014-12-18 09:39:00	7.0976		2014-09-17 21:04:00	7.28162		2015-02-13 13:15:00	4.64538		2014-10-25 06:13:00	10.0647
2014-12-18 09:49:00	7.0976		2014-09-17 22:04:00	7.27858		2015-02-13 13:25:00	4.64694		2014-10-25 07:13:00	10.0588
2014-12-18 09:59:00	7.09608		2014-09-17 23:04:00	7.28162		2015-02-13 13:35:00	4.64851		2014-10-25 08:13:00	10.0588
2014-12-18 10:09:00	7.09608		2014-09-18 00:04:00	7.2801		2015-02-13 13:45:00	4.65008		2014-10-25 09:13:00	10.0588
2014-12-18 10:19:00	7.09608		2014-09-18 01:04:00	7.2801		2015-02-13 13:55:00	4.65164		2014-10-25 10:13:00	10.0573
2014-12-18 10:29:00	7.09608		2014-09-18 02:04:00	7.28162		2015-02-13 14:05:00	4.65321		2014-10-25 11:13:00	10.0588
2014-12-18 10:39:00	7.09608		2014-09-18 03:04:00	7.28314		2015-02-13 14:15:00	4.65321		2014-10-25 12:13:00	10.0588
2014-12-18 10:49:00	7.0976		2014-09-18 04:04:00	7.27858		2015-02-13 14:25:00	4.65321		2014-10-25 13:13:00	10.0588
2014-12-18 10:59:00	7.09913		2014-09-18 05:04:00	7.2801		2015-02-13 14:35:00	4.65477		2014-10-25 14:13:00	10.0573
2014-12-18 11:09:00	7.0976		2014-09-18 06:04:00	7.2725		2015-02-13 14:45:00	4.65634		2014-10-25 15:13:00	10.0543
2014-12-18 11:19:00	7.0976		2014-09-18 07:04:00	7.27554		2015-02-13 14:55:00	4.65947		2014-10-25 16:13:00	10.0573
2014-12-18 11:29:00	7.0976		2014-09-18 08:04:00	7.27402		2015-02-13 15:05:00	4.65947		2014-10-25 17:13:00	10.0573
2014-12-18 11:39:00	7.0976		2014-09-18 09:04:00	7.27402		2015-02-13 15:15:00	4.6626		2014-10-25 18:13:00	10.0588
2014-12-18 11:49:00	7.0976		2014-09-18 10:04:00	7.27098		2015-02-13 15:25:00	4.6626		2014-10-25 19:13:00	10.0573
2014-12-18 11:59:00	7.0976		2014-09-18 11:04:00	7.2725		2015-02-13 15:35:00	4.66417		2014-10-25 20:13:00	10.0588
2014-12-18 12:09:00	7.09608		2014-09-18 12:04:00	7.27098		2015-02-13 15:45:00	4.66574		2014-10-25 21:13:00	10.0573
2014-12-18 12:19:00	7.09608		2014-09-18 13:04:00	7.27098		2015-02-13 15:55:00	4.66417		2014-10-25 22:13:00	10.0558
2014-12-18 12:29:00	7.09608		2014-09-18 14:04:00	7.26794		2015-02-13 16:05:00	4.66417		2014-10-25 23:13:00	10.0588
2014-12-18 12:39:00	7.09608		2014-09-18 15:04:00	7.26946		2015-02-13 16:15:00	4.66417		2014-10-26 00:13:00	10.0588
2014-12-18 12:49:00	7.09456		2014-09-18 16:04:00	7.26946		2015-02-13 16:25:00	4.66574		2014-10-26 01:13:00	10.0602
2014-12-18 12:59:00	7.09456		2014-09-18 17:04:00	7.26642		2015-02-13 16:35:00	4.66574		2014-10-26 02:13:00	10.0573
2014-12-18 13:09:00	7.09456		2014-09-18 18:04:00	7.26642		2015-02-13 16:45:00	4.66574		2014-10-26 03:13:00	10.0617
2014-12-18 13:19:00	7.09456		2014-09-18 19:04:00	7.26794		2015-02-13 16:55:00	4.66417		2014-10-26 04:13:00	10.0588
2014-12-18 13:29:00	7.09456		2014-09-18 20:04:00	7.26642		2015-02-13 17:05:00	4.6673		2014-10-26 05:13:00	10.0558
2014-12-18 13:39:00	7.09456		2014-09-18 21:04:00	7.2649		2015-02-13 17:15:00	4.66887		2014-10-26 06:13:00	10.0573
2014-12-18 13:49:00	7.09456		2014-09-18 22:04:00	7.2649		2015-02-13 17:25:00	4.67043		2014-10-26 07:13:00	10.0573
2014-12-18 13:59:00	7.09456		2014-09-18 23:04:00	7.26338		2015-02-13 17:35:00	4.672		2014-10-26 08:13:00	10.0602
2014-12-18 14:09:00	7.09456		2014-09-19 00:04:00	7.26338		2015-02-13 17:45:00	4.67356		2014-10-26 09:13:00	10.0602
2014-12-18 14:19:00	7.09456		2014-09-19 01:04:00	7.26338		2015-02-13 17:55:00	4.67669		2014-10-26 10:13:00	10.0617
2014-12-18 14:29:00	7.09456		2014-09-19 02:04:00	7.26186		2015-02-13 18:05:00	4.67669		2014-10-26 11:13:00	10.0588
2014-12-18 14:39:00	7.09456		2014-09-19 03:04:00	7.26338		2015-02-13 18:15:00	4.67826		2014-10-26 12:13:00	10.0588
2014-12-18 14:49:00	7.09456		2014-09-19 04:04:00	7.26186		2015-02-13 18:25:00	4.67826		2014-10-26 13:13:00	10.0573
2014-12-18 14:59:00	7.09456		2014-09-19 05:04:00	7.26186		2015-02-13 18:35:00	4.67983		2014-10-26 14:13:00	10.0573
2014-12-18 15:09:00	7.09456		2014-09-19 06:04:00	7.26186		2015-02-13 18:45:00	4.68139		2014-10-26 15:13:00	10.0573
2014-12-18 15:19:00	7.09456		2014-09-19 07:04:00	7.26186		2015-02-13 18:55:00	4.67983		2014-10-26 16:13:00	10.0573
2014-12-18 15:29:00	7.09456		2014-09-19 08:04:00	7.26338		2015-02-13 19:05:00	4.67826		2014-10-26 17:13:00	10.0602
2014-12-18 15:39:00	7.09456		2014-09-19 09:04:00	7.26338		2015-02-13 19:15:00	4.67669		2014-10-26 18:13:00	10.0588
2014-12-18 15:49:00	7.09456		2014-09-19 10:04:00	7.26186		2015-02-13 19:25:00	4.67356		2014-10-26 19:13:00	10.0543
2014-12-18 15:59:00	7.09456		2014-09-19 11:04:00	7.26034		2015-02-13 19:35:00	4.67356		2014-10-26 20:13:00	10.0573
2014-12-18 16:09:00	7.09456		2014-09-19 12:04:00	7.26186		2015-02-13 19:45:00	4.67356		2014-10-26 21:13:00	10.0588
2014-12-18 16:19:00	7.09456		2014-09-19 13:04:00	7.26034		2015-02-13 19:55:00	4.67356		2014-10-26 22:13:00	10.0602
2014-12-18 16:29:00	7.09456		2014-09-19 14:04:00	7.25882		2015-02-13 20:05:00	4.672		2014-10-26 23:13:00	10.0617
2014-12-18 16:39:00	7.09456		2014-09-19 15:04:00	7.25882		2015-02-13 20:15:00	4.672		2014-10-27 00:13:00	10.0558
2014-12-18 16:49:00	7.09456		2014-09-19 16:04:00	7.25426		2015-02-13 20:25:00	4.67356		2014-10-27 01:13:00	10.0602
2014-12-18 16:59:00	7.09456		2014-09-19 17:04:00	7.25882		2015-02-13 20:35:00	4.67513		2014-10-27 02:13:00	10.0573
2014-12-18 17:09:00	7.09456		2014-09-19 18:04:00	7.26034		2015-02-13 20:45:00	4.67356		2014-10-27 03:13:00	10.0573
2014-12-18 17:19:00	7.09608		2014-09-19 19:04:00	7.26034		2015-02-13 20:55:00	4.67356		2014-10-27 04:13:00	10.0573
2014-12-18 17:29:00	7.09608		2014-09-19 20:04:00	7.2573		2015-02-13 21:05:00	4.67669		2014-10-27 05:13:00	10.0543
2014-12-18 17:39:00	7.09608		2014-09-19 21:04:00	7.26034		2015-02-13 21:15:00	4.67513		2014-10-27 06:13:00	10.0573
2014-12-18 17:49:00	7.09608		2014-09-19 22:04:00	7.25882		2015-02-13 21:25:00	4.67669		2014-10-27 07:13:00	10.0514
2014-12-18 17:59:00	7.09608		2014-09-19 23:04:00	7.26186		2015-02-13 21:35:00	4.67513		2014-10-27 08:13:00	10.0528
2014-12-18 18:09:00	7.09608		2014-09-20 00:04:00	7.25882		2015-02-13 21:45:00	4.67356		2014-10-27 09:13:00	10.0588
2014-12-18 18:19:00	7.09608		2014-09-20 01:04:00	7.26186		2015-02-13 21:55:00	4.67356		2014-10-27 10:13:00	10.0558
2014-12-18 18:29:00	7.09608		2014-09-20 02:04:00	7.25882		2015-02-13 22:05:00	4.67356		2014-10-27 11:13:00	10.0543
2014-12-18 18:39:00	7.09608		2014-09-20 03:04:00	7.25882		2015-02-13 22:15:00	4.67356		2014-10-27 12:13:00	10.0573
2014-12-18 18:49:00	7.0976		2014-09-20 04:04:00	7.25882		2015-02-13 22:25:00	4.67513		2014-10-27 13:13:00	10.0469
2014-12-18 18:59:00	7.0976		2014-09-20 05:04:00	7.2573		2015-02-13 22:35:00	4.67669		2014-10-27 14:13:00	10.0484
2014-12-18 19:09:00	7.0976		2014-09-20 06:04:00	7.25578		2015-02-13 22:45:00	4.67826		2014-10-27 15:13:00	10.0514
2014-12-18 19:19:00	7.0976		2014-09-20 07:04:00	7.2573		2015-02-13 22:55:00	4.67826		2014-10-27 16:13:00	10.0543
2014-12-18 19:29:00	7.0976		2014-09-20 08:04:00	7.26034		2015-02-13 23:05:00	4.67826		2014-10-27 17:13:00	10.0528
2014-12-18 19:39:00	7.0976		2014-09-20 09:04:00	7.2573		2015-02-13 23:15:00	4.67826		2014-10-27 18:13:00	10.0543
2014-12-18 19:49:00	7.09913		2014-09-20 10:04:00	7.25426		2015-02-13 23:25:00	4.67826		2014-10-27 19:13:00	10.0617
2014-12-18 19:59:00	7.09913		2014-09-20 11:04:00	7.26034		2015-02-13 23:35:00	4.67826		2014-10-27 20:13:00	10.0558
2014-12-18 20:09:00	7.0976		2014-09-20 12:04:00	7.25578		2015-02-13 23:45:00	4.67669		2014-10-27 21:13:00	10.0558
2014-12-18 20:19:00	7.0976		2014-09-20 13:04:00	7.25882		2015-02-13 23:55:00	4.67826		2014-10-27 22:13:00	10.0573
2014-12-18 20:29:00	7.09608		2014-09-20 14:04:00	7.25578		2015-02-14 00:05:00	4.67826		2014-10-27 23:13:00	10.0543
2014-12-18 20:39:00	7.09456		2014-09-20 15:04:00	7.2573		2015-02-14 00:15:00	4.67826		2014-10-28 00:13:00	10.0514
2014-12-18 20:49:00	7.09456		2014-09-20 16:04:00	7.2573		2015-02-14 00:25:00	4.67983		2014-10-28 01:13:00	10.0499
2014-12-18 20:59:00	7.09456		2014-09-20 17:04:00	7.25426		2015-02-14 00:35:00	4.67983		2014-10-28 02:13:00	10.0484
2014-12-18 21:09:00	7.09608		2014-09-20 18:04:00	7.25882		2015-02-14 00:45:00	4.67983		2014-10-28 03:13:00	10.0469
2014-12-18 21:19:00	7.09608		2014-09-20 19:04:00	7.2573		2015-02-14 00:55:00	4.68139		2014-10-28 04:13:00	10.0499
2014-12-18 21:29:00	7.0976		2014-09-20 20:04:00	7.2573		2015-02-14 01:05:00	4.67983		2014-10-28 05:13:00	10.0484
2014-12-18 21:39:00	7.0976		2014-09-20 21:04:00	7.2573		2015-02-14 01:15:00	4.67826		2014-10-28 06:13:00	10.0469
2014-12-18 21:49:00	7.0976		2014-09-20 22:04:00	7.25882		2015-02-14 01:25:00	4.68139		2014-10-28 07:13:00	10.0484
2014-12-18 21:59:00	7.0976		2014-09-20 23:04:00	7.2573		2015-02-14 01:35:00	4.67983		2014-10-28 08:13:00	10.0469
2014-12-18 22:09:00	7.09913		2014-09-21 00:04:00	7.2573		2015-02-14 01:45:00	4.67983		2014-10-28 09:13:00	10.0543
2014-12-18 22:19:00	7.0976		2014-09-21 01:04:00	7.2573		2015-02-14 01:55:00	4.67826		2014-10-28 10:13:00	10.0528
2014-12-18 22:29:00	7.09913		2014-09-21 02:04:00	7.2573		2015-02-14 02:05:00	4.67669		2014-10-28 11:13:00	10.0499
2014-12-18 22:39:00	7.0976		2014-09-21 03:04:00	7.26034		2015-02-14 02:15:00	4.67513		2014-10-28 12:13:00	10.0514
2014-12-18 22:49:00	7.0976		2014-09-21 04:04:00	7.26034		2015-02-14 02:25:00	4.67356		2014-10-28 13:13:00	10.0484
2014-12-18 22:59:00	7.0976		2014-09-21 05:04:00	7.26338		2015-02-14 02:35:00	4.67356		2014-10-28 14:13:00	10.0484
2014-12-18 23:09:00	7.0976		2014-09-21 06:04:00	7.25578		2015-02-14 02:45:00	4.672		2014-10-28 15:13:00	10.0484
2014-12-18 23:19:00	7.0976		2014-09-21 07:04:00	7.25882		2015-02-14 02:55:00	4.67356		2014-10-28 16:13:00	10.0484
2014-12-18 23:29:00	7.0976		2014-09-21 08:04:00	7.26034		2015-02-14 03:05:00	4.67043		2014-10-28 17:13:00	10.0528
2014-12-18 23:39:00	7.09608		2014-09-21 09:04:00	7.25882		2015-02-14 03:15:00	4.67043		2014-10-28 18:13:00	10.0543
2014-12-18 23:49:00	7.0976		2014-09-21 10:04:00	7.26186		2015-02-14 03:25:00	4.67043		2014-10-28 19:13:00	10.0543
2014-12-18 23:59:00	7.0976		2014-09-21 11:04:00	7.26186		2015-02-14 03:35:00	4.66887		2014-10-28 20:13:00	10.0558
2014-12-19 00:09:00	7.0976		2014-09-21 12:04:00	7.26034		2015-02-14 03:45:00	4.66887		2014-10-28 21:13:00	10.0558
2014-12-19 00:19:00	7.0976		2014-09-21 13:04:00	7.26186		2015-02-14 03:55:00	4.67043		2014-10-28 22:13:00	10.0543
2014-12-19 00:29:00	7.09913		2014-09-21 14:04:00	7.26034		2015-02-14 04:05:00	4.66887		2014-10-28 23:13:00	10.0543
2014-12-19 00:39:00	7.09608		2014-09-21 15:04:00	7.26642		2015-02-14 04:15:00	4.66887		2014-10-29 00:13:00	10.0528
2014-12-19 00:49:00	7.09913		2014-09-21 16:04:00	7.26186		2015-02-14 04:25:00	4.66887		2014-10-29 01:13:00	10.0499
2014-12-19 00:59:00	7.0976		2014-09-21 17:04:00	7.26034		2015-02-14 04:35:00	4.67043		2014-10-29 02:13:00	10.0499
2014-12-19 01:09:00	7.0976		2014-09-21 18:04:00	7.26186		2015-02-14 04:45:00	4.67043		2014-10-29 03:13:00	10.0514
2014-12-19 01:19:00	7.0976		2014-09-21 19:04:00	7.26186		2015-02-14 04:55:00	4.66574		2014-10-29 04:13:00	10.0484
2014-12-19 01:29:00	7.0976		2014-09-21 20:04:00	7.26186		2015-02-14 05:05:00	4.66574		2014-10-29 05:13:00	10.0484
2014-12-19 01:39:00	7.09608		2014-09-21 21:04:00	7.26642		2015-02-14 05:15:00	4.6673		2014-10-29 06:13:00	10.0484
2014-12-19 01:49:00	7.09608		2014-09-21 22:04:00	7.26642		2015-02-14 05:25:00	4.66574		2014-10-29 07:13:00	10.0514
2014-12-19 01:59:00	7.09608		2014-09-21 23:04:00	7.26338		2015-02-14 05:35:00	4.66574		2014-10-29 08:13:00	10.0484
2014-12-19 02:09:00	7.09456		2014-09-22 00:04:00	7.26642		2015-02-14 05:45:00	4.66574		2014-10-29 09:13:00	10.0543
2014-12-19 02:19:00	7.09456		2014-09-22 01:04:00	7.26642		2015-02-14 05:55:00	4.66417		2014-10-29 10:13:00	10.0528
2014-12-19 02:29:00	7.09456		2014-09-22 02:04:00	7.26642		2015-02-14 06:05:00	4.66104		2014-10-29 11:13:00	10.0543
2014-12-19 02:39:00	7.09456		2014-09-22 03:04:00	7.26642		2015-02-14 06:15:00	4.66104		2014-10-29 12:13:00	10.0528
2014-12-19 02:49:00	7.09456		2014-09-22 04:04:00	7.26034		2015-02-14 06:25:00	4.66104		2014-10-29 13:13:00	10.0528
2014-12-19 02:59:00	7.09456		2014-09-22 05:04:00	7.2649		2015-02-14 06:35:00	4.66104		2014-10-29 14:13:00	10.0499
2014-12-19 03:09:00	7.09456		2014-09-22 06:04:00	7.26794		2015-02-14 06:45:00	4.65791		2014-10-29 15:13:00	10.0499
2014-12-19 03:19:00	7.09608		2014-09-22 07:04:00	7.26794		2015-02-14 06:55:00	4.65791		2014-10-29 16:13:00	10.0454
2014-12-19 03:29:00	7.09608		2014-09-22 08:04:00	7.2649		2015-02-14 07:05:00	4.65634		2014-10-29 17:13:00	10.0514
2014-12-19 03:39:00	7.09608		2014-09-22 09:04:00	7.26794		2015-02-14 07:15:00	4.65634		2014-10-29 18:13:00	10.0484
2014-12-19 03:49:00	7.09608		2014-09-22 10:04:00	7.2649		2015-02-14 07:25:00	4.65791		2014-10-29 19:13:00	10.0514
2014-12-19 03:59:00	7.0976		2014-09-22 11:04:00	7.26946		2015-02-14 07:35:00	4.65634		2014-10-29 20:13:00	10.0543
2014-12-19 04:09:00	7.09608		2014-09-22 12:04:00	7.2649		2015-02-14 07:45:00	4.65634		2014-10-29 21:13:00	10.0499
2014-12-19 04:19:00	7.09608		2014-09-22 13:04:00	7.2649		2015-02-14 07:55:00	4.65634		2014-10-29 22:13:00	10.0543
2014-12-19 04:29:00	7.09456		2014-09-22 14:04:00	7.26186		2015-02-14 08:05:00	4.65477		2014-10-29 23:13:00	10.0499
2014-12-19 04:39:00	7.09456		2014-09-22 15:04:00	7.26946		2015-02-14 08:15:00	4.65477		2014-10-30 00:13:00	10.0499
2014-12-19 04:49:00	7.09456		2014-09-22 16:04:00			2015-02-14 08:25:00	4.65477		2014-10-30 01:13:00	10.0528
2014-12-19 04:59:00	7.09152		2014-09-22 17:04:00			2015-02-14 08:35:00	4.65164		2014-10-30 02:13:00	10.0469
2014-12-19 05:09:00	7.09456		2014-09-22 18:04:00			2015-02-14 08:45:00	4.65321		2014-10-30 03:13:00	10.0528
2014-12-19 05:19:00	7.09456		2014-09-22 19:04:00			2015-02-14 08:55:00	4.65164		2014-10-30 04:13:00	10.0484
2014-12-19 05:29:00	7.09456		2014-09-22 20:04:00			2015-02-14 09:05:00	4.65477		2014-10-30 05:13:00	10.0543
2014-12-19 05:39:00	7.09456		2014-09-22 21:04:00			2015-02-14 09:15:00	4.65634		2014-10-30 06:13:00	10.0528
2014-12-19 05:49:00	7.09456		2014-09-22 22:04:00	7.27098		2015-02-14 09:25:00	4.66104		2014-10-30 07:13:00	10.0543
2014-12-19 05:59:00	7.09456		2014-09-22 23:04:00	7.26034		2015-02-14 09:35:00	4.6626		2014-10-30 08:13:00	10.0528
2014-12-19 06:09:00	7.09456		2014-09-23 00:04:00	7.26794		2015-02-14 09:45:00	4.66574		2014-10-30 09:13:00	10.0528
2014-12-19 06:19:00	7.09456		2014-09-23 01:04:00	7.26034		2015-02-14 09:55:00	4.6673		2014-10-30 10:13:00	10.0528
2014-12-19 06:29:00	7.09456		2014-09-23 02:04:00	7.26186		2015-02-14 10:05:00	4.66887		2014-10-30 11:13:00	10.0528
2014-12-19 06:39:00	7.09456		2014-09-23 03:04:00	7.25882		2015-02-14 10:15:00	4.672		2014-10-30 12:13:00	10.0528
2014-12-19 06:49:00	7.09456		2014-09-23 04:04:00	7.26794		2015-02-14 10:25:00	4.67513		2014-10-30 13:13:00	10.0543
2014-12-19 06:59:00	7.09456		2014-09-23 05:04:00	7.26338		2015-02-14 10:35:00	4.67826		2014-10-30 14:13:00	10.0558
2014-12-19 07:09:00	7.09456		2014-09-23 06:04:00	7.2649		2015-02-14 10:45:00	4.68139		2014-10-30 15:13:00	10.0514
2014-12-19 07:19:00	7.09456		2014-09-23 07:04:00	7.2649		2015-02-14 10:55:00	4.68296		2014-10-30 16:13:00	10.0558
2014-12-19 07:29:00	7.09456		2014-09-23 08:04:00	7.26186		2015-02-14 11:05:00	4.68609		2014-10-30 17:13:00	10.0558
2014-12-19 07:39:00	7.09456		2014-09-23 09:04:00	7.26338		2015-02-14 11:15:00	4.68765		2014-10-30 18:13:00	10.0573
2014-12-19 07:49:00	7.09608		2014-09-23 10:04:00	7.2725		2015-02-14 11:25:00	4.69078		2014-10-30 19:13:00	10.0558
2014-12-19 07:59:00	7.0976		2014-09-23 11:04:00	7.26642		2015-02-14 11:35:00	4.69235		2014-10-30 20:13:00	10.0573
2014-12-19 08:09:00	7.09608		2014-09-23 12:04:00	7.27402		2015-02-14 11:45:00	4.69391		2014-10-30 21:13:00	10.0543
2014-12-19 08:19:00	7.09608		2014-09-23 13:04:00	7.26794		2015-02-14 11:55:00	4.69548		2014-10-30 22:13:00	10.0528
2014-12-19 08:29:00	7.09608		2014-09-23 14:04:00	7.26794		2015-02-14 12:05:00	4.69861		2014-10-30 23:13:00	10.0543
2014-12-19 08:39:00	7.09608		2014-09-23 15:04:00	7.26642		2015-02-14 12:15:00	4.70017		2014-10-31 00:13:00	10.0558
2014-12-19 08:49:00	7.09456		2014-09-23 16:04:00	7.26794		2015-02-14 12:25:00	4.70174		2014-10-31 01:13:00	10.0558
2014-12-19 08:59:00	7.09456		2014-09-23 17:04:00	7.27098		2015-02-14 12:35:00	4.7033		2014-10-31 02:13:00	10.0543
2014-12-19 09:09:00	7.09456		2014-09-23 18:04:00	7.26794		2015-02-14 12:45:00	4.70487		2014-10-31 03:13:00	10.0558
2014-12-19 09:19:00	7.09456		2014-09-23 19:04:00	7.27402		2015-02-14 12:55:00	4.70643		2014-10-31 04:13:00	10.0528
2014-12-19 09:29:00	7.09456		2014-09-23 20:04:00	7.26794		2015-02-14 13:05:00	4.70956		2014-10-31 05:13:00	10.0558
2014-12-19 09:39:00	7.09608		2014-09-23 21:04:00	7.27098		2015-02-14 13:15:00	4.71113		2014-10-31 06:13:00	10.0543
2014-12-19 09:49:00	7.09456		2014-09-23 22:04:00	7.27402		2015-02-14 13:25:00	4.71113		2014-10-31 07:13:00	10.0528
2014-12-19 09:59:00	7.09456		2014-09-23 23:04:00	7.2725		2015-02-14 13:35:00	4.71426		2014-10-31 08:13:00	10.0543
2014-12-19 10:09:00	7.09456		2014-09-24 00:04:00	7.27098		2015-02-14 13:45:00	4.71426		2014-10-31 09:13:00	10.0514
2014-12-19 10:19:00	7.09608		2014-09-24 01:04:00	7.27098		2015-02-14 13:55:00	4.71582		2014-10-31 10:13:00	10.0543
2014-12-19 10:29:00	7.09456		2014-09-24 02:04:00	7.27554		2015-02-14 14:05:00	4.71895		2014-10-31 11:13:00	10.0558
2014-12-19 10:39:00	7.09456		2014-09-24 03:04:00	7.27098		2015-02-14 14:15:00	4.72052		2014-10-31 12:13:00	10.0558
2014-12-19 10:49:00	7.09456		2014-09-24 04:04:00	7.2725		2015-02-14 14:25:00	4.72052		2014-10-31 13:13:00	10.0543
2014-12-19 10:59:00	7.09456		2014-09-24 05:04:00	7.27098		2015-02-14 14:35:00	4.72208		2014-10-31 14:13:00	10.0558
2014-12-19 11:09:00	7.09608		2014-09-24 06:04:00	7.27402		2015-02-14 14:45:00	4.72365		2014-10-31 15:13:00	10.0558
2014-12-19 11:19:00	7.09456		2014-09-24 07:04:00	7.27402		2015-02-14 14:55:00	4.72521		2014-10-31 16:13:00	10.0558
2014-12-19 11:29:00	7.09456		2014-09-24 08:04:00	7.2725		2015-02-14 15:05:00	4.72521		2014-10-31 17:13:00	10.0558
2014-12-19 11:39:00	7.09456		2014-09-24 09:04:00	7.27554		2015-02-14 15:15:00	4.72521		2014-10-31 18:13:00	10.0558
2014-12-19 11:49:00	7.09456		2014-09-24 10:04:00	7.2725		2015-02-14 15:25:00	4.72678		2014-10-31 19:13:00	10.0558
2014-12-19 11:59:00	7.09456		2014-09-24 11:04:00	7.27706		2015-02-14 15:35:00	4.72521		2014-10-31 20:13:00	10.0543
2014-12-19 12:09:00	7.09456		2014-09-24 12:04:00	7.2725		2015-02-14 15:45:00	4.72678		2014-10-31 21:13:00	10.0528
2014-12-19 12:19:00	7.09456		2014-09-24 13:04:00	7.27554		2015-02-14 15:55:00	4.72521		2014-10-31 22:13:00	10.0528
2014-12-19 12:29:00	7.09456		2014-09-24 14:04:00	7.2725		2015-02-14 16:05:00	4.72678		2014-10-31 23:13:00	10.0558
2014-12-19 12:39:00	7.09456		2014-09-24 15:04:00	7.27706		2015-02-14 16:15:00	4.72521		2014-11-01 00:13:00	10.0573
2014-12-19 12:49:00	7.09456		2014-09-24 16:04:00	7.27554		2015-02-14 16:25:00	4.72521		2014-11-01 01:13:00	10.0558
2014-12-19 12:59:00	7.09456		2014-09-24 17:04:00	7.2725		2015-02-14 16:35:00	4.72521		2014-11-01 02:13:00	10.0543
2014-12-19 13:09:00	7.09456		2014-09-24 18:04:00	7.27706		2015-02-14 16:45:00	4.72521		2014-11-01 03:13:00	10.0528
2014-12-19 13:19:00	7.09456		2014-09-24 19:04:00	7.27706		2015-02-14 16:55:00	4.72521		2014-11-01 04:13:00	10.0543
2014-12-19 13:29:00	7.09456		2014-09-24 20:04:00	7.27858		2015-02-14 17:05:00	4.72521		2014-11-01 05:13:00	10.0528
2014-12-19 13:39:00	7.09456		2014-09-24 21:04:00	7.27858		2015-02-14 17:15:00	4.72365		2014-11-01 06:13:00	10.0528
2014-12-19 13:49:00	7.09456		2014-09-24 22:04:00	7.27706		2015-02-14 17:25:00	4.72521		2014-11-01 07:13:00	10.0499
2014-12-19 13:59:00	7.09304		2014-09-24 23:04:00	7.28162		2015-02-14 17:35:00	4.72678		2014-11-01 08:13:00	10.0514
2014-12-19 14:09:00	7.09456		2014-09-25 00:04:00	7.2801		2015-02-14 17:45:00	4.72678		2014-11-01 09:13:00	10.0514
2014-12-19 14:19:00	7.09304		2014-09-25 01:04:00	7.28314		2015-02-14 17:55:00	4.72678		2014-11-01 10:13:00	10.0528
2014-12-19 14:29:00	7.09456		2014-09-25 02:04:00	7.28314		2015-02-14 18:05:00	4.72678		2014-11-01 11:13:00	10.0514
2014-12-19 14:39:00	7.09456		2014-09-25 03:04:00	7.2801		2015-02-14 18:15:00	4.72521		2014-11-01 12:13:00	10.0558
2014-12-19 14:49:00	7.09456		2014-09-25 04:04:00	7.27858		2015-02-14 18:25:00	4.72521		2014-11-01 13:13:00	10.0528
2014-12-19 14:59:00	7.09456		2014-09-25 05:04:00	7.28162		2015-02-14 18:35:00	4.72521		2014-11-01 14:13:00	10.0528
2014-12-19 15:09:00	7.09456		2014-09-25 06:04:00	7.27706		2015-02-14 18:45:00	4.72365		2014-11-01 15:13:00	10.0558
2014-12-19 15:19:00	7.09304		2014-09-25 07:04:00	7.27858		2015-02-14 18:55:00	4.72052		2014-11-01 16:13:00	10.0528
2014-12-19 15:29:00	7.09304		2014-09-25 08:04:00	7.27706		2015-02-14 19:05:00	4.71895		2014-11-01 17:13:00	10.0543
2014-12-19 15:39:00	7.09456		2014-09-25 09:04:00	7.27554		2015-02-14 19:15:00	4.71895		2014-11-01 18:13:00	10.0543
2014-12-19 15:49:00	7.09456		2014-09-25 10:04:00	7.2801		2015-02-14 19:25:00	4.71895		2014-11-01 19:13:00	10.0514
2014-12-19 15:59:00	7.09456		2014-09-25 11:04:00	7.27706		2015-02-14 19:35:00	4.71739		2014-11-01 20:13:00	10.0543
2014-12-19 16:09:00	7.09456		2014-09-25 12:04:00	7.2801		2015-02-14 19:45:00	4.71582		2014-11-01 21:13:00	10.0499
2014-12-19 16:19:00	7.09304		2014-09-25 13:04:00	7.2801		2015-02-14 19:55:00	4.71269		2014-11-01 22:13:00	10.0528
2014-12-19 16:29:00	7.09456		2014-09-25 14:04:00	7.2725		2015-02-14 20:05:00	4.71113		2014-11-01 23:13:00	10.0499
2014-12-19 16:39:00	7.09456		2014-09-25 15:04:00	7.27554		2015-02-14 20:15:00	4.71113		2014-11-02 00:13:00	10.0484
2014-12-19 16:49:00	7.09456		2014-09-25 16:04:00	7.27706		2015-02-14 20:25:00	4.71269		2014-11-02 01:13:00	10.0543
2014-12-19 16:59:00	7.09304		2014-09-25 17:04:00	7.27554		2015-02-14 20:35:00	4.71113		2014-11-02 02:13:00	10.0543
2014-12-19 17:09:00	7.09456		2014-09-25 18:04:00	7.27706		2015-02-14 20:45:00	4.70956		2014-11-02 03:13:00	10.0514
2014-12-19 17:19:00	7.09304		2014-09-25 19:04:00	7.2801		2015-02-14 20:55:00	4.708		2014-11-02 04:13:00	10.0514
2014-12-19 17:29:00	7.09456		2014-09-25 20:04:00	7.27402		2015-02-14 21:05:00	4.70643		2014-11-02 05:13:00	10.0528
2014-12-19 17:39:00	7.09456		2014-09-25 21:04:00	7.28314		2015-02-14 21:15:00	4.70643		2014-11-02 06:13:00	10.0528
2014-12-19 17:49:00	7.09304		2014-09-25 22:04:00	7.27858		2015-02-14 21:25:00	4.708		2014-11-02 07:13:00	10.0499
2014-12-19 17:59:00	7.09304		2014-09-25 23:04:00	7.2801		2015-02-14 21:35:00	4.7033		2014-11-02 08:13:00	10.0499
2014-12-19 18:09:00	7.09608		2014-09-26 00:04:00	7.27858		2015-02-14 21:45:00	4.70487		2014-11-02 09:13:00	10.0543
2014-12-19 18:19:00	7.09608		2014-09-26 01:04:00	7.27858		2015-02-14 21:55:00	4.70487		2014-11-02 10:13:00	10.0543
2014-12-19 18:29:00	7.09456		2014-09-26 02:04:00	7.27706		2015-02-14 22:05:00	4.7033		2014-11-02 11:13:00	10.0543
2014-12-19 18:39:00	7.09456		2014-09-26 03:04:00	7.27706		2015-02-14 22:15:00	4.7033		2014-11-02 12:13:00	10.0514
2014-12-19 18:49:00	7.09456		2014-09-26 04:04:00	7.2801		2015-02-14 22:25:00	4.70017		2014-11-02 13:13:00	10.0484
2014-12-19 18:59:00	7.09456		2014-09-26 05:04:00	7.27858		2015-02-14 22:35:00	4.69861		2014-11-02 14:13:00	10.0484
2014-12-19 19:09:00	7.09456		2014-09-26 06:04:00	7.27706		2015-02-14 22:45:00	4.69704		2014-11-02 15:13:00	10.0469
2014-12-19 19:19:00	7.09608		2014-09-26 07:04:00	7.28162		2015-02-14 22:55:00	4.69704		2014-11-02 16:13:00	10.0528
2014-12-19 19:29:00	7.09456		2014-09-26 08:04:00	7.27706		2015-02-14 23:05:00	4.69861		2014-11-02 17:13:00	10.0528
2014-12-19 19:39:00	7.09456		2014-09-26 09:04:00	7.2801		2015-02-14 23:15:00	4.69861		2014-11-02 18:13:00	10.0528
2014-12-19 19:49:00	7.09456		2014-09-26 10:04:00	7.27858		2015-02-14 23:25:00	4.70017		2014-11-02 19:13:00	10.0558
2014-12-19 19:59:00	7.09456		2014-09-26 11:04:00	7.28162		2015-02-14 23:35:00	4.69704		2014-11-02 20:13:00	10.0543
2014-12-19 20:09:00	7.09456		2014-09-26 12:04:00	7.27706		2015-02-14 23:45:00	4.69548		2014-11-02 21:13:00	10.0514
2014-12-19 20:19:00	7.09456		2014-09-26 13:04:00	7.2801		2015-02-14 23:55:00	4.69548		2014-11-02 22:13:00	10.0514
2014-12-19 20:29:00	7.09456		2014-09-26 14:04:00	7.2801		2015-02-15 00:05:00	4.69548		2014-11-02 23:13:00	10.0514
2014-12-19 20:39:00	7.09456		2014-09-26 15:04:00	7.27858		2015-02-15 00:15:00	4.69391		2014-11-03 00:13:00	10.0543
2014-12-19 20:49:00	7.09456		2014-09-26 16:04:00	7.28162		2015-02-15 00:25:00	4.69078		2014-11-03 01:13:00	10.0558
2014-12-19 20:59:00	7.09456		2014-09-26 17:04:00	7.27858		2015-02-15 00:35:00	4.68922		2014-11-03 02:13:00	10.0558
2014-12-19 21:09:00	7.09456		2014-09-26 18:04:00	7.27858		2015-02-15 00:45:00	4.68765		2014-11-03 03:13:00	10.0514
2014-12-19 21:19:00	7.09456		2014-09-26 19:04:00	7.2801		2015-02-15 00:55:00	4.68765		2014-11-03 04:13:00	10.0499
2014-12-19 21:29:00	7.09608		2014-09-26 20:04:00	7.2801		2015-02-15 01:05:00	4.68609		2014-11-03 05:13:00	10.0499
2014-12-19 21:39:00	7.09608		2014-09-26 21:04:00	7.2801		2015-02-15 01:15:00	4.68296		2014-11-03 06:13:00	10.0484
2014-12-19 21:49:00	7.09608		2014-09-26 22:04:00	7.2801		2015-02-15 01:25:00	4.67983		2014-11-03 07:13:00	10.0514
2014-12-19 21:59:00	7.09608		2014-09-26 23:04:00	7.28314		2015-02-15 01:35:00	4.67826		2014-11-03 08:13:00	10.0514
2014-12-19 22:09:00	7.09608		2014-09-27 00:04:00	7.28162		2015-02-15 01:45:00	4.67983		2014-11-03 09:13:00	10.0558
2014-12-19 22:19:00	7.09608		2014-09-27 01:04:00	7.28162		2015-02-15 01:55:00	4.67983		2014-11-03 10:13:00	10.0528
2014-12-19 22:29:00	7.09608		2014-09-27 02:04:00	7.2801		2015-02-15 02:05:00	4.68139		2014-11-03 11:13:00	10.0514
2014-12-19 22:39:00	7.0976		2014-09-27 03:04:00	7.2801		2015-02-15 02:15:00	4.68296		2014-11-03 12:13:00	10.0528
2014-12-19 22:49:00	7.0976		2014-09-27 04:04:00	7.2801		2015-02-15 02:25:00	4.68296		2014-11-03 13:13:00	10.0499
2014-12-19 22:59:00	7.09913		2014-09-27 05:04:00	7.28162		2015-02-15 02:35:00	4.68296		2014-11-03 14:13:00	10.0469
2014-12-19 23:09:00	7.09913		2014-09-27 06:04:00	7.28314		2015-02-15 02:45:00	4.68296		2014-11-03 15:13:00	10.0454
2014-12-19 23:19:00	7.0976		2014-09-27 07:04:00	7.28314		2015-02-15 02:55:00	4.68296		2014-11-03 16:13:00	10.0499
2014-12-19 23:29:00	7.0976		2014-09-27 08:04:00	7.28465		2015-02-15 03:05:00	4.68452		2014-11-03 17:13:00	10.0514
2014-12-19 23:39:00	7.0976		2014-09-27 09:04:00	7.28465		2015-02-15 03:15:00	4.68452		2014-11-03 18:13:00	10.0514
2014-12-19 23:49:00	7.0976		2014-09-27 10:04:00	7.28162		2015-02-15 03:25:00	4.68296		2014-11-03 19:13:00	10.0514
2014-12-19 23:59:00	7.09456		2014-09-27 11:04:00	7.28314		2015-02-15 03:35:00	4.68139		2014-11-03 20:13:00	10.0514
2014-12-20 00:09:00	7.08847		2014-09-27 12:04:00	7.2801		2015-02-15 03:45:00	4.67983		2014-11-03 21:13:00	10.0499
2014-12-20 00:19:00	7.08238		2014-09-27 13:04:00	7.28162		2015-02-15 03:55:00	4.67669		2014-11-03 22:13:00	10.0499
2014-12-20 00:29:00	7.08238		2014-09-27 14:04:00	7.28162		2015-02-15 04:05:00	4.67983		2014-11-03 23:13:00	10.044
2014-12-20 00:39:00	7.08238		2014-09-27 15:04:00	7.28162		2015-02-15 04:15:00	4.67983		2014-11-04 00:13:00	10.0484
2014-12-20 00:49:00	7.08086		2014-09-27 16:04:00	7.2801		2015-02-15 04:25:00	4.67826		2014-11-04 01:13:00	10.0484
2014-12-20 00:59:00	7.07934		2014-09-27 17:04:00	7.28162		2015-02-15 04:35:00	4.67513		2014-11-04 02:13:00	10.0484
2014-12-20 01:09:00	7.07781		2014-09-27 18:04:00	7.28162		2015-02-15 04:45:00	4.67513		2014-11-04 03:13:00	10.0514
2014-12-20 01:19:00	7.07781		2014-09-27 19:04:00	7.28162		2015-02-15 04:55:00	4.67356		2014-11-04 04:13:00	10.0484
2014-12-20 01:29:00	7.07781		2014-09-27 20:04:00	7.28314		2015-02-15 05:05:00	4.672		2014-11-04 05:13:00	10.0469
2014-12-20 01:39:00	7.07629		2014-09-27 21:04:00	7.28314		2015-02-15 05:15:00	4.67043		2014-11-04 06:13:00	10.0484
2014-12-20 01:49:00	7.07629		2014-09-27 22:04:00	7.28314		2015-02-15 05:25:00	4.672		2014-11-04 07:13:00	10.0469
2014-12-20 01:59:00	7.07629		2014-09-27 23:04:00	7.27706		2015-02-15 05:35:00	4.67043		2014-11-04 08:13:00	10.0469
2014-12-20 02:09:00	7.07629		2014-09-28 00:04:00	7.28162		2015-02-15 05:45:00	4.67043		2014-11-04 09:13:00	10.0454
2014-12-20 02:19:00	7.07629		2014-09-28 01:04:00	7.28162		2015-02-15 05:55:00	4.67043		2014-11-04 10:13:00	10.0469
2014-12-20 02:29:00	7.07629		2014-09-28 02:04:00	7.28465		2015-02-15 06:05:00	4.67043		2014-11-04 11:13:00	10.0469
2014-12-20 02:39:00	7.07477		2014-09-28 03:04:00	7.2801		2015-02-15 06:15:00	4.672		2014-11-04 12:13:00	10.0484
2014-12-20 02:49:00	7.07629		2014-09-28 04:04:00	7.28162		2015-02-15 06:25:00	4.672		2014-11-04 13:13:00	10.0499
2014-12-20 02:59:00	7.07629		2014-09-28 05:04:00	7.28617		2015-02-15 06:35:00	4.66887		2014-11-04 14:13:00	10.0484
2014-12-20 03:09:00	7.07629		2014-09-28 06:04:00	7.28314		2015-02-15 06:45:00	4.66574		2014-11-04 15:13:00	10.0469
2014-12-20 03:19:00	7.07629		2014-09-28 07:04:00	7.27858		2015-02-15 06:55:00	4.6626		2014-11-04 16:13:00	10.0528
2014-12-20 03:29:00	7.07629		2014-09-28 08:04:00	7.28162		2015-02-15 07:05:00	4.66417		2014-11-04 17:13:00	10.0543
2014-12-20 03:39:00	7.07629		2014-09-28 09:04:00	7.28465		2015-02-15 07:15:00	4.66104		2014-11-04 18:13:00	10.0528
2014-12-20 03:49:00	7.07629		2014-09-28 10:04:00	7.28314		2015-02-15 07:25:00	4.65947		2014-11-04 19:13:00	10.0514
2014-12-20 03:59:00	7.07781		2014-09-28 11:04:00	7.2801		2015-02-15 07:35:00	4.65947		2014-11-04 20:13:00	10.0528
2014-12-20 04:09:00	7.07629		2014-09-28 12:04:00	7.28314		2015-02-15 07:45:00	4.65634		2014-11-04 21:13:00	10.0469
2014-12-20 04:19:00	7.07629		2014-09-28 13:04:00	7.28162		2015-02-15 07:55:00	4.65634		2014-11-04 22:13:00	10.0558
2014-12-20 04:29:00	7.07477		2014-09-28 14:04:00	7.27858		2015-02-15 08:05:00	4.65634		2014-11-04 23:13:00	10.0543
2014-12-20 04:39:00	7.07477		2014-09-28 15:04:00	7.28314		2015-02-15 08:15:00	4.65634		2014-11-05 00:13:00	10.0454
2014-12-20 04:49:00	7.07477		2014-09-28 16:04:00	7.28617		2015-02-15 08:25:00	4.65477		2014-11-05 01:13:00	10.0528
2014-12-20 04:59:00	7.07477		2014-09-28 17:04:00	7.28162		2015-02-15 08:35:00	4.65477		2014-11-05 02:13:00	10.0469
2014-12-20 05:09:00	7.07477		2014-09-28 18:04:00	7.28314		2015-02-15 08:45:00	4.65164		2014-11-05 03:13:00	10.0528
2014-12-20 05:19:00	7.07477		2014-09-28 19:04:00	7.28162		2015-02-15 08:55:00	4.65321		2014-11-05 04:13:00	10.0469
2014-12-20 05:29:00	7.07629		2014-09-28 20:04:00	7.28617		2015-02-15 09:05:00	4.65477		2014-11-05 05:13:00	10.0469
2014-12-20 05:39:00	7.07781		2014-09-28 21:04:00	7.2801		2015-02-15 09:15:00	4.65477		2014-11-05 06:13:00	10.0454
2014-12-20 05:49:00	7.07629		2014-09-28 22:04:00	7.28465		2015-02-15 09:25:00	4.65477		2014-11-05 07:13:00	10.0469
2014-12-20 05:59:00	7.07781		2014-09-28 23:04:00	7.28617		2015-02-15 09:35:00	4.65791		2014-11-05 08:13:00	10.0484
2014-12-20 06:09:00	7.07781		2014-09-29 00:04:00	7.28921		2015-02-15 09:45:00	4.65791		2014-11-05 09:13:00	10.0499
2014-12-20 06:19:00	7.07781		2014-09-29 01:04:00	7.28465		2015-02-15 09:55:00	4.66104		2014-11-05 10:13:00	10.0469
2014-12-20 06:29:00	7.07781		2014-09-29 02:04:00	7.28617		2015-02-15 10:05:00	4.6626		2014-11-05 11:13:00	10.0528
2014-12-20 06:39:00	7.07934		2014-09-29 03:04:00	7.28617		2015-02-15 10:15:00	4.6626		2014-11-05 12:13:00	10.0499
2014-12-20 06:49:00	7.07934		2014-09-29 04:04:00	7.28769		2015-02-15 10:25:00	4.66574		2014-11-05 13:13:00	10.0469
2014-12-20 06:59:00	7.08086		2014-09-29 05:04:00	7.28921		2015-02-15 10:35:00	4.66887		2014-11-05 14:13:00	10.0499
2014-12-20 07:09:00	7.07934		2014-09-29 06:04:00	7.28162		2015-02-15 10:45:00	4.672		2014-11-05 15:13:00	10.0484
2014-12-20 07:19:00	7.07781		2014-09-29 07:04:00	7.28617		2015-02-15 10:55:00	4.67513		2014-11-05 16:13:00	10.0514
2014-12-20 07:29:00	7.07934		2014-09-29 08:04:00	7.28921		2015-02-15 11:05:00	4.67669		2014-11-05 17:13:00	10.0514
2014-12-20 07:39:00	7.07934		2014-09-29 09:04:00	7.28617		2015-02-15 11:15:00	4.67983		2014-11-05 18:13:00	10.0543
2014-12-20 07:49:00	7.07934		2014-09-29 10:04:00	7.28617		2015-02-15 11:25:00	4.68139		2014-11-05 19:13:00	10.0528
2014-12-20 07:59:00	7.07934		2014-09-29 11:04:00	7.28617		2015-02-15 11:35:00	4.68139		2014-11-05 20:13:00	10.0528
2014-12-20 08:09:00	7.07781		2014-09-29 12:04:00	7.28769		2015-02-15 11:45:00	4.68452		2014-11-05 21:13:00	10.0499
2014-12-20 08:19:00	7.07934		2014-09-29 13:04:00	7.28769		2015-02-15 11:55:00	4.68452		2014-11-05 22:13:00	10.0528
2014-12-20 08:29:00	7.07934		2014-09-29 14:04:00	7.28769		2015-02-15 12:05:00	4.68609		2014-11-05 23:13:00	10.0528
2014-12-20 08:39:00	7.08086		2014-09-29 15:04:00	7.28617		2015-02-15 12:15:00	4.68765		2014-11-06 00:13:00	10.0528
2014-12-20 08:49:00	7.07934		2014-09-29 16:04:00	7.28314		2015-02-15 12:25:00	4.68765		2014-11-06 01:13:00	10.0528
2014-12-20 08:59:00	7.08086		2014-09-29 17:04:00	7.28465		2015-02-15 12:35:00	4.68922		2014-11-06 02:13:00	10.0514
2014-12-20 09:09:00	7.0839		2014-09-29 18:04:00	7.28617		2015-02-15 12:45:00	4.69078		2014-11-06 03:13:00	10.0514
2014-12-20 09:19:00	7.08086		2014-09-29 19:04:00	7.28465		2015-02-15 12:55:00	4.69235		2014-11-06 04:13:00	10.0514
2014-12-20 09:29:00	7.08238		2014-09-29 20:04:00	7.28769		2015-02-15 13:05:00	4.69078		2014-11-06 05:13:00	10.0499
2014-12-20 09:39:00	7.08238		2014-09-29 21:04:00	7.28617		2015-02-15 13:15:00	4.69391		2014-11-06 06:13:00	10.0499
2014-12-20 09:49:00	7.08238		2014-09-29 22:04:00	7.28617		2015-02-15 13:25:00	4.69548		2014-11-06 07:13:00	10.0499
2014-12-20 09:59:00	7.08086		2014-09-29 23:04:00	7.28769		2015-02-15 13:35:00	4.69861		2014-11-06 08:13:00	10.0499
2014-12-20 10:09:00	7.07934		2014-09-30 00:04:00	7.28617		2015-02-15 13:45:00	4.70017		2014-11-06 09:13:00	10.0543
2014-12-20 10:19:00	7.07781		2014-09-30 01:04:00	7.28314		2015-02-15 13:55:00	4.70017		2014-11-06 10:13:00	10.0514
2014-12-20 10:29:00	7.07781		2014-09-30 02:04:00	7.28465		2015-02-15 14:05:00	4.70174		2014-11-06 11:13:00	10.0514
2014-12-20 10:39:00	7.07629		2014-09-30 03:04:00	7.28314		2015-02-15 14:15:00	4.7033		2014-11-06 12:13:00	10.0514
2014-12-20 10:49:00	7.07781		2014-09-30 04:04:00	7.28314		2015-02-15 14:25:00	4.70487		2014-11-06 13:13:00	10.0514
2014-12-20 10:59:00	7.07934		2014-09-30 05:04:00	7.28617		2015-02-15 14:35:00	4.70643		2014-11-06 14:13:00	10.0528
2014-12-20 11:09:00	7.08086		2014-09-30 06:04:00	7.28769		2015-02-15 14:45:00	4.70643		2014-11-06 15:13:00	10.0514
2014-12-20 11:19:00	7.08238		2014-09-30 07:04:00	7.28921		2015-02-15 14:55:00	4.708		2014-11-06 16:13:00	10.0514
2014-12-20 11:29:00	7.0839		2014-09-30 08:04:00	7.28465		2015-02-15 15:05:00	4.70956		2014-11-06 17:13:00	10.0528
2014-12-20 11:39:00	7.08543		2014-09-30 09:04:00	7.28769		2015-02-15 15:15:00	4.71269		2014-11-06 18:13:00	10.0528
2014-12-20 11:49:00	7.08695		2014-09-30 10:04:00	7.28617		2015-02-15 15:25:00	4.71426		2014-11-06 19:13:00	10.0543
2014-12-20 11:59:00	7.08999		2014-09-30 11:04:00	7.28921		2015-02-15 15:35:00	4.71426		2014-11-06 20:13:00	10.0528
2014-12-20 12:09:00	7.08999		2014-09-30 12:04:00	7.28465		2015-02-15 15:45:00	4.71426		2014-11-06 21:13:00	10.0469
2014-12-20 12:19:00	7.08999		2014-09-30 13:04:00	7.28921		2015-02-15 15:55:00	4.71426		2014-11-06 22:13:00	10.0543
2014-12-20 12:29:00	7.09304		2014-09-30 14:04:00	7.28769		2015-02-15 16:05:00	4.71582		2014-11-06 23:13:00	10.0543
2014-12-20 12:39:00	7.09304		2014-09-30 15:04:00	7.28617		2015-02-15 16:15:00	4.71582		2014-11-07 00:13:00	10.0499
2014-12-20 12:49:00	7.09152		2014-09-30 16:04:00	7.28921		2015-02-15 16:25:00	4.71269		2014-11-07 01:13:00	10.0543
2014-12-20 12:59:00	7.08695		2014-09-30 17:04:00	7.28617		2015-02-15 16:35:00	4.71269		2014-11-07 02:13:00	10.0499
2014-12-20 13:09:00	7.08238		2014-09-30 18:04:00	7.28769		2015-02-15 16:45:00	4.71269		2014-11-07 03:13:00	10.0514
2014-12-20 13:19:00	7.08086		2014-09-30 19:04:00	7.28921		2015-02-15 16:55:00	4.70956		2014-11-07 04:13:00	10.0514
2014-12-20 13:29:00	7.08695		2014-09-30 20:04:00	7.28769		2015-02-15 17:05:00	4.708		2014-11-07 05:13:00	10.0543
2014-12-20 13:39:00	7.08847		2014-09-30 21:04:00	7.28617		2015-02-15 17:15:00	4.70643		2014-11-07 06:13:00	10.0514
2014-12-20 13:49:00	7.09152		2014-09-30 22:04:00	7.28769		2015-02-15 17:25:00	4.70643		2014-11-07 07:13:00	10.0514
2014-12-20 13:59:00	7.09304		2014-09-30 23:04:00	7.28617		2015-02-15 17:35:00	4.70643		2014-11-07 08:13:00	10.0573
2014-12-20 14:09:00	7.09304		2014-10-01 00:04:00	7.29073		2015-02-15 17:45:00	4.70956		2014-11-07 09:13:00	10.0543
2014-12-20 14:19:00	7.09456		2014-10-01 01:04:00	7.28769		2015-02-15 17:55:00	4.70643		2014-11-07 10:13:00	10.0514
2014-12-20 14:29:00	7.09304		2014-10-01 02:04:00	7.28617		2015-02-15 18:05:00	4.70643		2014-11-07 11:13:00	10.0528
2014-12-20 14:39:00	7.09304		2014-10-01 03:04:00	7.28769		2015-02-15 18:15:00	4.70487		2014-11-07 12:13:00	10.0528
2014-12-20 14:49:00	7.09456		2014-10-01 04:04:00	7.29073		2015-02-15 18:25:00	4.70487		2014-11-07 13:13:00	10.0484
2014-12-20 14:59:00	7.09304		2014-10-01 05:04:00	7.28769		2015-02-15 18:35:00	4.70487		2014-11-07 14:13:00	10.0528
2014-12-20 15:09:00	7.09456		2014-10-01 06:04:00	7.28617		2015-02-15 18:45:00	4.7033		2014-11-07 15:13:00	10.0514
2014-12-20 15:19:00	7.09456		2014-10-01 07:04:00	7.29073		2015-02-15 18:55:00	4.7033		2014-11-07 16:13:00	10.0484
2014-12-20 15:29:00	7.09456		2014-10-01 08:04:00	7.28921		2015-02-15 19:05:00	4.70174		2014-11-07 17:13:00	10.0528
2014-12-20 15:39:00	7.09304		2014-10-01 09:04:00	7.28769		2015-02-15 19:15:00	4.70017		2014-11-07 18:13:00	10.0528
2014-12-20 15:49:00	7.09304		2014-10-01 10:04:00	7.29073		2015-02-15 19:25:00	4.70174		2014-11-07 19:13:00	10.0543
2014-12-20 15:59:00	7.09304		2014-10-01 11:04:00	7.29073		2015-02-15 19:35:00	4.69861		2014-11-07 20:13:00	10.0499
2014-12-20 16:09:00	7.09304		2014-10-01 12:04:00	7.29225		2015-02-15 19:45:00	4.69548		2014-11-07 21:13:00	10.0514
2014-12-20 16:19:00	7.09304		2014-10-01 13:04:00	7.29073		2015-02-15 19:55:00	4.69704		2014-11-07 22:13:00	10.0499
2014-12-20 16:29:00	7.09456		2014-10-01 14:04:00	7.29073		2015-02-15 20:05:00	4.69548		2014-11-07 23:13:00	10.0514
2014-12-20 16:39:00	7.09456		2014-10-01 15:04:00	7.28769		2015-02-15 20:15:00	4.69391		2014-11-08 00:13:00	10.0514
2014-12-20 16:49:00	7.09304		2014-10-01 16:04:00	7.29073		2015-02-15 20:25:00	4.69391		2014-11-08 01:13:00	10.0484
2014-12-20 16:59:00	7.09456		2014-10-01 17:04:00	7.29073		2015-02-15 20:35:00	4.69391		2014-11-08 02:13:00	10.0499
2014-12-20 17:09:00	7.09608		2014-10-01 18:04:00	7.28617		2015-02-15 20:45:00	4.69235		2014-11-08 03:13:00	10.0528
2014-12-20 17:19:00	7.09608		2014-10-01 19:04:00	7.29073		2015-02-15 20:55:00	4.68922		2014-11-08 04:13:00	10.0499
2014-12-20 17:29:00	7.09608		2014-10-01 20:04:00	7.29377		2015-02-15 21:05:00	4.68922		2014-11-08 05:13:00	10.0499
2014-12-20 17:39:00	7.09608		2014-10-01 21:04:00	7.29073		2015-02-15 21:15:00	4.69078		2014-11-08 06:13:00	10.0514
2014-12-20 17:49:00	7.09608		2014-10-01 22:04:00	7.29073		2015-02-15 21:25:00	4.68922		2014-11-08 07:13:00	10.0499
2014-12-20 17:59:00	7.09608		2014-10-01 23:04:00	7.29073		2015-02-15 21:35:00	4.68765		2014-11-08 08:13:00	10.0484
2014-12-20 18:09:00	7.09608		2014-10-02 00:04:00	7.28921		2015-02-15 21:45:00	4.68765		2014-11-08 09:13:00	10.0528
2014-12-20 18:19:00	7.09608		2014-10-02 01:04:00	7.29073		2015-02-15 21:55:00	4.68922		2014-11-08 10:13:00	10.0543
2014-12-20 18:29:00	7.09608		2014-10-02 02:04:00	7.29073		2015-02-15 22:05:00	4.68765		2014-11-08 11:13:00	10.0528
2014-12-20 18:39:00	7.09456		2014-10-02 03:04:00	7.28465		2015-02-15 22:15:00	4.68922		2014-11-08 12:13:00	10.0514
2014-12-20 18:49:00	7.09456		2014-10-02 04:04:00	7.29225		2015-02-15 22:25:00	4.68922		2014-11-08 13:13:00	10.0543
2014-12-20 18:59:00	7.09456		2014-10-02 05:04:00	7.28921		2015-02-15 22:35:00	4.68765		2014-11-08 14:13:00	10.0528
2014-12-20 19:09:00	7.09152		2014-10-02 06:04:00	7.28617		2015-02-15 22:45:00	4.68765		2014-11-08 15:13:00	10.0588
2014-12-20 19:19:00	7.0839		2014-10-02 07:04:00	7.29529		2015-02-15 22:55:00	4.68452		2014-11-08 16:13:00	10.0617
2014-12-20 19:29:00	7.08238		2014-10-02 08:04:00	7.29377		2015-02-15 23:05:00	4.68452		2014-11-08 17:13:00	10.0632
2014-12-20 19:39:00	7.07934		2014-10-02 09:04:00	7.29073		2015-02-15 23:15:00	4.68139		2014-11-08 18:13:00	10.0706
2014-12-20 19:49:00	7.07934		2014-10-02 10:04:00	7.29073		2015-02-15 23:25:00	4.67983		2014-11-08 19:13:00	10.0617
2014-12-20 19:59:00	7.07781		2014-10-02 11:04:00	7.29073		2015-02-15 23:35:00	4.67983		2014-11-08 20:13:00	10.0602
2014-12-20 20:09:00	7.07629		2014-10-02 12:04:00	7.29073		2015-02-15 23:45:00	4.68139		2014-11-08 21:13:00	10.0558
2014-12-20 20:19:00	7.07781		2014-10-02 13:04:00	7.29377		2015-02-15 23:55:00	4.68139		2014-11-08 22:13:00	10.0514
2014-12-20 20:29:00	7.07781		2014-10-02 14:04:00	7.29073		2015-02-16 00:05:00	4.68139		2014-11-08 23:13:00	10.0528
2014-12-20 20:39:00	7.07781		2014-10-02 15:04:00	7.28921		2015-02-16 00:15:00	4.68296		2014-11-09 00:13:00	10.0499
2014-12-20 20:49:00	7.07781		2014-10-02 16:04:00	7.29073		2015-02-16 00:25:00	4.68139		2014-11-09 01:13:00	10.0558
2014-12-20 20:59:00	7.07477		2014-10-02 17:04:00	7.29377		2015-02-16 00:35:00	4.67983		2014-11-09 02:13:00	10.0543
2014-12-20 21:09:00	7.07477		2014-10-02 18:04:00	7.29225		2015-02-16 00:45:00	4.67826		2014-11-09 03:13:00	10.0543
2014-12-20 21:19:00	7.07325		2014-10-02 19:04:00	7.29225		2015-02-16 00:55:00	4.67826		2014-11-09 04:13:00	10.0528
2014-12-20 21:29:00	7.07325		2014-10-02 20:04:00	7.29225		2015-02-16 01:05:00	4.67826		2014-11-09 05:13:00	10.0528
2014-12-20 21:39:00	7.07477		2014-10-02 21:04:00	7.29225		2015-02-16 01:15:00	4.67826		2014-11-09 06:13:00	10.0528
2014-12-20 21:49:00	7.07172		2014-10-02 22:04:00	7.29529		2015-02-16 01:25:00	4.67826		2014-11-09 07:13:00	10.0469
2014-12-20 21:59:00	7.07172		2014-10-02 23:04:00	7.29377		2015-02-16 01:35:00	4.67356		2014-11-09 08:13:00	10.0499
2014-12-20 22:09:00	7.07325		2014-10-03 00:04:00	7.29377		2015-02-16 01:45:00	4.672		2014-11-09 09:13:00	10.0514
2014-12-20 22:19:00	7.07477		2014-10-03 01:04:00	7.29073		2015-02-16 01:55:00	4.67356		2014-11-09 10:13:00	10.0469
2014-12-20 22:29:00	7.07477		2014-10-03 02:04:00	7.28921		2015-02-16 02:05:00	4.67356		2014-11-09 11:13:00	10.0528
2014-12-20 22:39:00	7.07325		2014-10-03 03:04:00	7.29073		2015-02-16 02:15:00	4.672		2014-11-09 12:13:00	10.0514
2014-12-20 22:49:00	7.07325		2014-10-03 04:04:00	7.29225		2015-02-16 02:25:00	4.672		2014-11-09 13:13:00	10.0499
2014-12-20 22:59:00	7.07172		2014-10-03 05:04:00	7.28921		2015-02-16 02:35:00	4.67356		2014-11-09 14:13:00	10.0514
2014-12-20 23:09:00	7.07172		2014-10-03 06:04:00	7.29377		2015-02-16 02:45:00	4.67043		2014-11-09 15:13:00	10.0528
2014-12-20 23:19:00	7.0702		2014-10-03 07:04:00	7.29073		2015-02-16 02:55:00	4.672		2014-11-09 16:13:00	10.0514
2014-12-20 23:29:00	7.07172		2014-10-03 08:04:00	7.29073		2015-02-16 03:05:00	4.672		2014-11-09 17:13:00	10.0484
2014-12-20 23:39:00	7.07172		2014-10-03 09:04:00	7.29225		2015-02-16 03:15:00	4.66887		2014-11-09 18:13:00	10.0543
2014-12-20 23:49:00	7.07325		2014-10-03 10:04:00	7.29225		2015-02-16 03:25:00	4.6673		2014-11-09 19:13:00	10.0528
2014-12-20 23:59:00	7.07477		2014-10-03 11:04:00	7.28769		2015-02-16 03:35:00	4.6673		2014-11-09 20:13:00	10.0528
2014-12-21 00:09:00	7.07934		2014-10-03 12:04:00	7.29073		2015-02-16 03:45:00	4.66574		2014-11-09 21:13:00	10.0543
2014-12-21 00:19:00	7.08086		2014-10-03 13:04:00	7.28921		2015-02-16 03:55:00	4.66574		2014-11-09 22:13:00	10.0514
2014-12-21 00:29:00	7.07477		2014-10-03 14:04:00	7.28921		2015-02-16 04:05:00	4.6673		2014-11-09 23:13:00	10.0499
2014-12-21 00:39:00	7.07325		2014-10-03 15:04:00	7.29073		2015-02-16 04:15:00	4.66574		2014-11-10 00:13:00	10.0573
2014-12-21 00:49:00	7.0702		2014-10-03 16:04:00	7.29225		2015-02-16 04:25:00	4.66574		2014-11-10 01:13:00	10.0558
2014-12-21 00:59:00	7.06716		2014-10-03 17:04:00	7.28921		2015-02-16 04:35:00	4.6673		2014-11-10 02:13:00	10.0484
2014-12-21 01:09:00	7.06868		2014-10-03 18:04:00	7.29377		2015-02-16 04:45:00	4.66887		2014-11-10 03:13:00	10.0514
2014-12-21 01:19:00	7.06563		2014-10-03 19:04:00	7.29225		2015-02-16 04:55:00	4.66574		2014-11-10 04:13:00	10.0528
2014-12-21 01:29:00	7.06716		2014-10-03 20:04:00	7.29377		2015-02-16 05:05:00	4.66417		2014-11-10 05:13:00	10.0454
2014-12-21 01:39:00	7.06868		2014-10-03 21:04:00	7.29073		2015-02-16 05:15:00	4.66417		2014-11-10 06:13:00	10.0528
2014-12-21 01:49:00	7.06716		2014-10-03 22:04:00	7.29377		2015-02-16 05:25:00	4.66574		2014-11-10 07:13:00	10.0484
2014-12-21 01:59:00	7.06563		2014-10-03 23:04:00	7.29073		2015-02-16 05:35:00	4.65791		2014-11-10 08:13:00	10.0514
2014-12-21 02:09:00	7.06716		2014-10-04 00:04:00	7.29073		2015-02-16 05:45:00	4.65947		2014-11-10 09:13:00	10.0558
2014-12-21 02:19:00	7.06868		2014-10-04 01:04:00	7.29681		2015-02-16 05:55:00	4.65634		2014-11-10 10:13:00	10.0528
2014-12-21 02:29:00	7.06716		2014-10-04 02:04:00	7.29225		2015-02-16 06:05:00	4.65791		2014-11-10 11:13:00	10.0528
2014-12-21 02:39:00	7.06716		2014-10-04 03:04:00	7.29225		2015-02-16 06:15:00	4.65791		2014-11-10 12:13:00	10.0499
2014-12-21 02:49:00	7.06716		2014-10-04 04:04:00	7.29073		2015-02-16 06:25:00	4.65634		2014-11-10 13:13:00	10.0469
2014-12-21 02:59:00	7.06868		2014-10-04 05:04:00	7.29073		2015-02-16 06:35:00	4.65634		2014-11-10 14:13:00	10.0469
2014-12-21 03:09:00	7.06868		2014-10-04 06:04:00	7.29073		2015-02-16 06:45:00	4.65634		2014-11-10 15:13:00	10.0484
2014-12-21 03:19:00	7.06868		2014-10-04 07:04:00	7.29073		2015-02-16 06:55:00	4.65477		2014-11-10 16:13:00	10.0528
2014-12-21 03:29:00	7.06868		2014-10-04 08:04:00	7.29377		2015-02-16 07:05:00	4.65477		2014-11-10 17:13:00	10.0528
2014-12-21 03:39:00	7.07172		2014-10-04 09:04:00	7.29225		2015-02-16 07:15:00	4.65477		2014-11-10 18:13:00	10.0528
2014-12-21 03:49:00	7.07172		2014-10-04 10:04:00	7.29225		2015-02-16 07:25:00	4.65321		2014-11-10 19:13:00	10.0514
2014-12-21 03:59:00	7.07781		2014-10-04 11:04:00	7.28921		2015-02-16 07:35:00	4.65321		2014-11-10 20:13:00	10.0558
2014-12-21 04:09:00	7.08238		2014-10-04 12:04:00	7.29073		2015-02-16 07:45:00	4.65008		2014-11-10 21:13:00	10.0528
2014-12-21 04:19:00	7.0839		2014-10-04 13:04:00	7.29225		2015-02-16 07:55:00	4.64851		2014-11-10 22:13:00	10.0528
2014-12-21 04:29:00	7.0839		2014-10-04 14:04:00	7.29073		2015-02-16 08:05:00	4.64851		2014-11-10 23:13:00	10.0528
2014-12-21 04:39:00	7.08543		2014-10-04 15:04:00	7.29225		2015-02-16 08:15:00	4.64851		2014-11-11 00:13:00	10.0514
2014-12-21 04:49:00	7.08695		2014-10-04 16:04:00	7.29073		2015-02-16 08:25:00	4.64851		2014-11-11 01:13:00	10.0514
2014-12-21 04:59:00	7.08695		2014-10-04 17:04:00	7.28921		2015-02-16 08:35:00	4.64694		2014-11-11 02:13:00	10.0499
2014-12-21 05:09:00	7.08847		2014-10-04 18:04:00	7.29377		2015-02-16 08:45:00	4.64851		2014-11-11 03:13:00	10.0499
2014-12-21 05:19:00	7.08999		2014-10-04 19:04:00	7.29681		2015-02-16 08:55:00	4.64851		2014-11-11 04:13:00	10.0528
2014-12-21 05:29:00	7.08999		2014-10-04 20:04:00	7.29529		2015-02-16 09:05:00	4.64694		2014-11-11 05:13:00	10.0469
2014-12-21 05:39:00	7.09152		2014-10-04 21:04:00	7.29225		2015-02-16 09:15:00	4.64538		2014-11-11 06:13:00	10.0543
2014-12-21 05:49:00	7.09152		2014-10-04 22:04:00	7.29073		2015-02-16 09:25:00	4.64538		2014-11-11 07:13:00	10.0543
2014-12-21 05:59:00	7.08999		2014-10-04 23:04:00	7.29377		2015-02-16 09:35:00	4.64381		2014-11-11 08:13:00	10.0484
2014-12-21 06:09:00	7.08847		2014-10-05 00:04:00	7.29225		2015-02-16 09:45:00	4.64851		2014-11-11 09:13:00	10.0514
2014-12-21 06:19:00	7.09152		2014-10-05 01:04:00	7.29529		2015-02-16 09:55:00	4.65321		2014-11-11 10:13:00	10.0499
2014-12-21 06:29:00	7.09152		2014-10-05 02:04:00	7.28921		2015-02-16 10:05:00	4.65477		2014-11-11 11:13:00	10.0484
2014-12-21 06:39:00	7.09456		2014-10-05 03:04:00	7.28921		2015-02-16 10:15:00	4.65947		2014-11-11 12:13:00	10.0499
2014-12-21 06:49:00	7.09608		2014-10-05 04:04:00	7.28921		2015-02-16 10:25:00	4.66417		2014-11-11 13:13:00	10.0499
2014-12-21 06:59:00	7.09608		2014-10-05 05:04:00	7.29529		2015-02-16 10:35:00	4.6673		2014-11-11 14:13:00	10.044
2014-12-21 07:09:00	7.09456		2014-10-05 06:04:00	7.28921		2015-02-16 10:45:00	4.67043		2014-11-11 15:13:00	10.0454
2014-12-21 07:19:00	7.09456		2014-10-05 07:04:00	7.29225		2015-02-16 10:55:00	4.67356		2014-11-11 16:13:00	10.0514
2014-12-21 07:29:00	7.09456		2014-10-05 08:04:00	7.29377		2015-02-16 11:05:00	4.67356		2014-11-11 17:13:00	10.0469
2014-12-21 07:39:00	7.09304		2014-10-05 09:04:00	7.29681		2015-02-16 11:15:00	4.67669		2014-11-11 18:13:00	10.0543
2014-12-21 07:49:00	7.09152		2014-10-05 10:04:00	7.29073		2015-02-16 11:25:00	4.67983		2014-11-11 19:13:00	10.0499
2014-12-21 07:59:00	7.09152		2014-10-05 11:04:00	7.29529		2015-02-16 11:35:00	4.68139		2014-11-11 20:13:00	10.0484
2014-12-21 08:09:00	7.0976		2014-10-05 12:04:00	7.29529		2015-02-16 11:45:00	4.68452		2014-11-11 21:13:00	10.0484
2014-12-21 08:19:00	7.09913		2014-10-05 13:04:00	7.29073		2015-02-16 11:55:00	4.68609		2014-11-11 22:13:00	10.0543
2014-12-21 08:29:00	7.09913		2014-10-05 14:04:00	7.29073		2015-02-16 12:05:00	4.68609		2014-11-11 23:13:00	10.0499
2014-12-21 08:39:00	7.09913		2014-10-05 15:04:00	7.29681		2015-02-16 12:15:00	4.68765		2014-11-12 00:13:00	10.0528
2014-12-21 08:49:00	7.09913		2014-10-05 16:04:00	7.29225		2015-02-16 12:25:00	4.68922		2014-11-12 01:13:00	10.0454
2014-12-21 08:59:00	7.0976		2014-10-05 17:04:00	7.29529		2015-02-16 12:35:00	4.68765		2014-11-12 02:13:00	10.0484
2014-12-21 09:09:00	7.09608		2014-10-05 18:04:00	7.29377		2015-02-16 12:45:00	4.68452		2014-11-12 03:13:00	10.044
2014-12-21 09:19:00	7.0976		2014-10-05 19:04:00	7.29225		2015-02-16 12:55:00	4.67983		2014-11-12 04:13:00	10.0484
2014-12-21 09:29:00	7.09913		2014-10-05 20:04:00	7.29529		2015-02-16 13:05:00	4.67513		2014-11-12 05:13:00	10.044
2014-12-21 09:39:00	7.09913		2014-10-05 21:04:00	7.29681		2015-02-16 13:15:00	4.672		2014-11-12 06:13:00	10.044
2014-12-21 09:49:00	7.09913		2014-10-05 22:04:00	7.29377		2015-02-16 13:25:00	4.67043		2014-11-12 07:13:00	10.0469
2014-12-21 09:59:00	7.09913		2014-10-05 23:04:00	7.29681		2015-02-16 13:35:00	4.672		2014-11-12 08:13:00	10.0514
2014-12-21 10:09:00	7.10065		2014-10-06 00:04:00	7.29225		2015-02-16 13:45:00	4.67043		2014-11-12 09:13:00	10.0514
2014-12-21 10:19:00	7.10065		2014-10-06 01:04:00	7.29225		2015-02-16 13:55:00	4.672		2014-11-12 10:13:00	10.0528
2014-12-21 10:29:00	7.10065		2014-10-06 02:04:00	7.29377		2015-02-16 14:05:00	4.672		2014-11-12 11:13:00	10.0514
2014-12-21 10:39:00	7.10065		2014-10-06 03:04:00	7.29529		2015-02-16 14:15:00	4.67043		2014-11-12 12:13:00	10.0484
2014-12-21 10:49:00	7.10065		2014-10-06 04:04:00	7.29529		2015-02-16 14:25:00	4.67356		2014-11-12 13:13:00	10.044
2014-12-21 10:59:00	7.10065		2014-10-06 05:04:00	7.29225		2015-02-16 14:35:00	4.67356		2014-11-12 14:13:00	10.0499
2014-12-21 11:09:00	7.10065		2014-10-06 06:04:00	7.29225		2015-02-16 14:45:00	4.672		2014-11-12 15:13:00	10.0469
2014-12-21 11:19:00	7.10217		2014-10-06 07:04:00	7.29529		2015-02-16 14:55:00	4.67356		2014-11-12 16:13:00	10.0514
2014-12-21 11:29:00	7.10217		2014-10-06 08:04:00	7.29529		2015-02-16 15:05:00	4.672		2014-11-12 17:13:00	10.0484
2014-12-21 11:39:00	7.10065		2014-10-06 09:04:00	7.29377		2015-02-16 15:15:00	4.672		2014-11-12 18:13:00	10.0454
2014-12-21 11:49:00	7.10217		2014-10-06 10:04:00	7.29225		2015-02-16 15:25:00	4.67043		2014-11-12 19:13:00	10.0499
2014-12-21 11:59:00	7.10065		2014-10-06 11:04:00	7.29377		2015-02-16 15:35:00	4.672		2014-11-12 20:13:00	10.0514
2014-12-21 12:09:00	7.10065		2014-10-06 12:04:00	7.29529		2015-02-16 15:45:00	4.672		2014-11-12 21:13:00	10.0484
2014-12-21 12:19:00	7.09913		2014-10-06 13:04:00	7.29225		2015-02-16 15:55:00	4.67043		2014-11-12 22:13:00	10.0469
2014-12-21 12:29:00	7.09456		2014-10-06 14:04:00	7.29529		2015-02-16 16:05:00	4.672		2014-11-12 23:13:00	10.0514
2014-12-21 12:39:00	7.09304		2014-10-06 15:04:00	7.29377		2015-02-16 16:15:00	4.67043		2014-11-13 00:13:00	10.0469
2014-12-21 12:49:00	7.09456		2014-10-06 16:04:00	7.29225		2015-02-16 16:25:00	4.67043		2014-11-13 01:13:00	10.0528
2014-12-21 12:59:00	7.09456		2014-10-06 17:04:00	7.29529		2015-02-16 16:35:00	4.67043		2014-11-13 02:13:00	10.0484
2014-12-21 13:09:00	7.09304		2014-10-06 18:04:00	7.29377		2015-02-16 16:45:00	4.67043		2014-11-13 03:13:00	10.0499
2014-12-21 13:19:00	7.09152		2014-10-06 19:04:00	7.29377		2015-02-16 16:55:00	4.6673		2014-11-13 04:13:00	10.0499
2014-12-21 13:29:00	7.09152		2014-10-06 20:04:00	7.29377		2015-02-16 17:05:00	4.66887		2014-11-13 05:13:00	10.0543
2014-12-21 13:39:00	7.09304		2014-10-06 21:04:00	7.29681		2015-02-16 17:15:00	4.6673		2014-11-13 06:13:00	10.0528
2014-12-21 13:49:00	7.09456		2014-10-06 22:04:00	7.29529		2015-02-16 17:25:00	4.66574		2014-11-13 07:13:00	10.0499
2014-12-21 13:59:00	7.09304		2014-10-06 23:04:00	7.29681		2015-02-16 17:35:00	4.66574		2014-11-13 08:13:00	10.0499
2014-12-21 14:09:00	7.09456		2014-10-07 00:04:00	7.29377		2015-02-16 17:45:00	4.66417		2014-11-13 09:13:00	10.0499
2014-12-21 14:19:00	7.09304		2014-10-07 01:04:00	7.29225		2015-02-16 17:55:00	4.6626		2014-11-13 10:13:00	10.0528
2014-12-21 14:29:00	7.09304		2014-10-07 02:04:00	7.28921		2015-02-16 18:05:00	4.6626		2014-11-13 11:13:00	10.0543
2014-12-21 14:39:00	7.09304		2014-10-07 03:04:00	7.29377		2015-02-16 18:15:00	4.66417		2014-11-13 12:13:00	10.0469
2014-12-21 14:49:00	7.09152		2014-10-07 04:04:00	7.29225		2015-02-16 18:25:00	4.6626		2014-11-13 13:13:00	10.0484
2014-12-21 14:59:00	7.09304		2014-10-07 05:04:00	7.29377		2015-02-16 18:35:00	4.66104		2014-11-13 14:13:00	10.0499
2014-12-21 15:09:00	7.09456		2014-10-07 06:04:00	7.29073		2015-02-16 18:45:00	4.66104		2014-11-13 15:13:00	10.0469
2014-12-21 15:19:00	7.09608		2014-10-07 07:04:00	7.28921		2015-02-16 18:55:00	4.65791		2014-11-13 16:13:00	10.0514
2014-12-21 15:29:00	7.0976		2014-10-07 08:04:00	7.29225		2015-02-16 19:05:00	4.65947		2014-11-13 17:13:00	10.0514
2014-12-21 15:39:00	7.0976		2014-10-07 09:04:00	7.29529		2015-02-16 19:15:00	4.65634		2014-11-13 18:13:00	10.0543
2014-12-21 15:49:00	7.0976		2014-10-07 10:04:00	7.29529		2015-02-16 19:25:00	4.65477		2014-11-13 19:13:00	10.0528
2014-12-21 15:59:00	7.0976		2014-10-07 11:04:00	7.29529		2015-02-16 19:35:00	4.65477		2014-11-13 20:13:00	10.0499
2014-12-21 16:09:00	7.0976		2014-10-07 12:04:00	7.29681		2015-02-16 19:45:00	4.65634		2014-11-13 21:13:00	10.0543
2014-12-21 16:19:00	7.09913		2014-10-07 13:04:00	7.29681		2015-02-16 19:55:00	4.65791		2014-11-13 22:13:00	10.0514
2014-12-21 16:29:00	7.09608		2014-10-07 14:04:00	7.29073		2015-02-16 20:05:00	4.66104		2014-11-13 23:13:00	10.0514
2014-12-21 16:39:00	7.09608		2014-10-07 15:04:00	7.29377		2015-02-16 20:15:00	4.65791		2014-11-14 00:13:00	10.0499
2014-12-21 16:49:00	7.09608		2014-10-07 16:04:00	7.29073		2015-02-16 20:25:00	4.65634		2014-11-14 01:13:00	10.0514
2014-12-21 16:59:00	7.09913		2014-10-07 17:04:00	7.29225		2015-02-16 20:35:00	4.65791		2014-11-14 02:13:00	10.0514
2014-12-21 17:09:00	7.09913		2014-10-07 18:04:00	7.29225		2015-02-16 20:45:00	4.65634		2014-11-14 03:13:00	10.0484
2014-12-21 17:19:00	7.10065		2014-10-07 19:04:00	7.29529		2015-02-16 20:55:00	4.65477		2014-11-14 04:13:00	10.0514
2014-12-21 17:29:00	7.09913		2014-10-07 20:04:00	7.29681		2015-02-16 21:05:00	4.65791		2014-11-14 05:13:00	10.0543
2014-12-21 17:39:00	7.0976		2014-10-07 21:04:00	7.29377		2015-02-16 21:15:00	4.65791		2014-11-14 06:13:00	10.0514
2014-12-21 17:49:00	7.09608		2014-10-07 22:04:00	7.29377		2015-02-16 21:25:00	4.65634		2014-11-14 07:13:00	10.0499
2014-12-21 17:59:00	7.0976		2014-10-07 23:04:00	7.29225		2015-02-16 21:35:00	4.65321		2014-11-14 08:13:00	10.0514
2014-12-21 18:09:00	7.0976		2014-10-08 00:04:00	7.29377		2015-02-16 21:45:00	4.65321		2014-11-14 09:13:00	10.0484
2014-12-21 18:19:00	7.09608		2014-10-08 01:04:00	7.29225		2015-02-16 21:55:00	4.65321		2014-11-14 10:13:00	10.0528
2014-12-21 18:29:00	7.0976		2014-10-08 02:04:00	7.29225		2015-02-16 22:05:00	4.65321		2014-11-14 11:13:00	10.0514
2014-12-21 18:39:00	7.09913		2014-10-08 03:04:00	7.29073		2015-02-16 22:15:00	4.65008		2014-11-14 12:13:00	10.0543
2014-12-21 18:49:00	7.09913		2014-10-08 04:04:00	7.29073		2015-02-16 22:25:00	4.65321		2014-11-14 13:13:00	10.0469
2014-12-21 18:59:00	7.09913		2014-10-08 05:04:00	7.28921		2015-02-16 22:35:00	4.65321		2014-11-14 14:13:00	10.0543
2014-12-21 19:09:00	7.09913		2014-10-08 06:04:00	7.29073		2015-02-16 22:45:00	4.65321		2014-11-14 15:13:00	10.0558
2014-12-21 19:19:00	7.09608		2014-10-08 07:04:00	7.29225		2015-02-16 22:55:00	4.65634		2014-11-14 16:13:00	10.0528
2014-12-21 19:29:00	7.0976		2014-10-08 08:04:00	7.29073		2015-02-16 23:05:00	4.65477		2014-11-14 17:13:00	10.0528
2014-12-21 19:39:00	7.09913		2014-10-08 09:04:00	7.29377		2015-02-16 23:15:00	4.65477		2014-11-14 18:13:00	10.0558
2014-12-21 19:49:00	7.0976		2014-10-08 10:04:00	7.29225		2015-02-16 23:25:00	4.65321		2014-11-14 19:13:00	10.0484
2014-12-21 19:59:00	7.0976		2014-10-08 11:04:00	7.29225		2015-02-16 23:35:00	4.65477		2014-11-14 20:13:00	10.0499
2014-12-21 20:09:00	7.0976		2014-10-08 12:04:00	7.28921		2015-02-16 23:45:00	4.65634		2014-11-14 21:13:00	10.0543
2014-12-21 20:19:00	7.09608		2014-10-08 13:04:00	7.28769		2015-02-16 23:55:00	4.65791		2014-11-14 22:13:00	10.0484
2014-12-21 20:29:00	7.09913		2014-10-08 14:04:00	7.29225		2015-02-17 00:05:00	4.65634		2014-11-14 23:13:00	10.0528
2014-12-21 20:39:00	7.0976		2014-10-08 15:04:00	7.29073		2015-02-17 00:15:00	4.65477		2014-11-15 00:13:00	10.0543
2014-12-21 20:49:00	7.0976		2014-10-08 16:04:00	7.29073		2015-02-17 00:25:00	4.65634		2014-11-15 01:13:00	10.0528
2014-12-21 20:59:00	7.09913		2014-10-08 17:04:00	7.28769		2015-02-17 00:35:00	4.65634		2014-11-15 02:13:00	10.0514
2014-12-21 21:09:00	7.09913		2014-10-08 18:04:00	7.29073		2015-02-17 00:45:00	4.65321		2014-11-15 03:13:00	10.0528
2014-12-21 21:19:00	7.09913		2014-10-08 19:04:00	7.28769		2015-02-17 00:55:00	4.65477		2014-11-15 04:13:00	10.0499
2014-12-21 21:29:00	7.09913		2014-10-08 20:04:00	7.29073		2015-02-17 01:05:00	4.65164		2014-11-15 05:13:00	10.0484
2014-12-21 21:39:00	7.09913		2014-10-08 21:04:00	7.28921		2015-02-17 01:15:00	4.64851		2014-11-15 06:13:00	10.0514
2014-12-21 21:49:00	7.0976		2014-10-08 22:04:00	7.28617		2015-02-17 01:25:00	4.64694		2014-11-15 07:13:00	10.044
2014-12-21 21:59:00	7.09608		2014-10-08 23:04:00	7.29073		2015-02-17 01:35:00	4.64538		2014-11-15 08:13:00	10.0499
2014-12-21 22:09:00	7.09608		2014-10-09 00:04:00	7.28921		2015-02-17 01:45:00	4.64225		2014-11-15 09:13:00	10.0528
2014-12-21 22:19:00	7.09456		2014-10-09 01:04:00	7.28921		2015-02-17 01:55:00	4.64381		2014-11-15 10:13:00	10.0484
2014-12-21 22:29:00	7.09456		2014-10-09 02:04:00	7.29377		2015-02-17 02:05:00	4.64225		2014-11-15 11:13:00	10.0469
2014-12-21 22:39:00	7.09456		2014-10-09 03:04:00	7.28769		2015-02-17 02:15:00	4.64538		2014-11-15 12:13:00	10.0484
2014-12-21 22:49:00	7.09304		2014-10-09 04:04:00	7.28769		2015-02-17 02:25:00	4.64694		2014-11-15 13:13:00	10.0454
2014-12-21 22:59:00	7.09304		2014-10-09 05:04:00	7.28921		2015-02-17 02:35:00	4.64068		2014-11-15 14:13:00	10.0469
2014-12-21 23:09:00	7.09608		2014-10-09 06:04:00	7.28617		2015-02-17 02:45:00	4.63911		2014-11-15 15:13:00	10.0469
2014-12-21 23:19:00	7.0976		2014-10-09 07:04:00	7.28921		2015-02-17 02:55:00	4.63911		2014-11-15 16:13:00	10.0499
2014-12-21 23:29:00	7.10065		2014-10-09 08:04:00	7.29225		2015-02-17 03:05:00	4.63598		2014-11-15 17:13:00	10.0454
2014-12-21 23:39:00	7.09913		2014-10-09 09:04:00	7.28921		2015-02-17 03:15:00	4.63441		2014-11-15 18:13:00	10.0499
2014-12-21 23:49:00	7.09913		2014-10-09 10:04:00	7.28921		2015-02-17 03:25:00	4.63128		2014-11-15 19:13:00	10.0469
2014-12-21 23:59:00	7.09456		2014-10-09 11:04:00	7.28769		2015-02-17 03:35:00	4.62658		2014-11-15 20:13:00	10.0514
2014-12-22 00:09:00	7.09456		2014-10-09 12:04:00	7.28769		2015-02-17 03:45:00	4.62658		2014-11-15 21:13:00	10.0499
2014-12-22 00:19:00	7.09608		2014-10-09 13:04:00	7.28617		2015-02-17 03:55:00	4.62658		2014-11-15 22:13:00	10.0469
2014-12-22 00:29:00	7.09608		2014-10-09 14:04:00	7.28769		2015-02-17 04:05:00	4.62345		2014-11-15 23:13:00	10.0514
2014-12-22 00:39:00	7.09304		2014-10-09 15:04:00	7.28921		2015-02-17 04:15:00	4.62345		2014-11-16 00:13:00	10.0484
2014-12-22 00:49:00	7.09608		2014-10-09 16:04:00	7.28921		2015-02-17 04:25:00	4.62032		2014-11-16 01:13:00	10.0484
2014-12-22 00:59:00	7.09608		2014-10-09 17:04:00	7.29073		2015-02-17 04:35:00	4.62188		2014-11-16 02:13:00	10.0484
2014-12-22 01:09:00	7.09608		2014-10-09 18:04:00	7.28921		2015-02-17 04:45:00	4.62502		2014-11-16 03:13:00	10.0484
2014-12-22 01:19:00	7.09456		2014-10-09 19:04:00	7.29073		2015-02-17 04:55:00	4.62188		2014-11-16 04:13:00	10.0484
2014-12-22 01:29:00	7.09456		2014-10-09 20:04:00	7.29073		2015-02-17 05:05:00	4.62188		2014-11-16 05:13:00	10.0425
2014-12-22 01:39:00	7.09456		2014-10-09 21:04:00	7.28769		2015-02-17 05:15:00	4.61875		2014-11-16 06:13:00	10.0484
2014-12-22 01:49:00	7.09304		2014-10-09 22:04:00	7.29073		2015-02-17 05:25:00	4.61875		2014-11-16 07:13:00	10.044
2014-12-22 01:59:00	7.09152		2014-10-09 23:04:00	7.29073		2015-02-17 05:35:00	4.61561		2014-11-16 08:13:00	10.0499
2014-12-22 02:09:00	7.09304		2014-10-10 00:04:00	7.28921		2015-02-17 05:45:00	4.61405		2014-11-16 09:13:00	10.0543
2014-12-22 02:19:00	7.09304		2014-10-10 01:04:00	7.28617		2015-02-17 05:55:00	4.60778		2014-11-16 10:13:00	10.0484
2014-12-22 02:29:00	7.09152		2014-10-10 02:04:00	7.28769		2015-02-17 06:05:00	4.60621		2014-11-16 11:13:00	10.044
2014-12-22 02:39:00	7.09152		2014-10-10 03:04:00	7.29377		2015-02-17 06:15:00	4.60465		2014-11-16 12:13:00	10.0514
2014-12-22 02:49:00	7.09152		2014-10-10 04:04:00	7.28921		2015-02-17 06:25:00	4.60151		2014-11-16 13:13:00	10.0484
2014-12-22 02:59:00	7.09304		2014-10-10 05:04:00	7.28921		2015-02-17 06:35:00	4.59524		2014-11-16 14:13:00	10.0454
2014-12-22 03:09:00	7.09304		2014-10-10 06:04:00	7.29225		2015-02-17 06:45:00	4.59838		2014-11-16 15:13:00	10.0469
2014-12-22 03:19:00	7.09152		2014-10-10 07:04:00	7.29225		2015-02-17 06:55:00	4.59524		2014-11-16 16:13:00	10.0469
2014-12-22 03:29:00	7.09152		2014-10-10 08:04:00	7.29225		2015-02-17 07:05:00	4.59368		2014-11-16 17:13:00	10.0454
2014-12-22 03:39:00	7.09152		2014-10-10 09:04:00	7.28921		2015-02-17 07:15:00	4.59211		2014-11-16 18:13:00	10.0528
2014-12-22 03:49:00	7.09304		2014-10-10 10:04:00	7.28769		2015-02-17 07:25:00	4.58741		2014-11-16 19:13:00	10.0469
2014-12-22 03:59:00	7.09456		2014-10-10 11:04:00	7.28921		2015-02-17 07:35:00	4.58898		2014-11-16 20:13:00	10.0484
2014-12-22 04:09:00	7.09456		2014-10-10 12:04:00	7.29073		2015-02-17 07:45:00	4.58898		2014-11-16 21:13:00	10.0528
2014-12-22 04:19:00	7.09152		2014-10-10 13:04:00	7.29225		2015-02-17 07:55:00	4.58584		2014-11-16 22:13:00	10.0484
2014-12-22 04:29:00	7.09152		2014-10-10 14:04:00	7.28769		2015-02-17 08:05:00	4.58271		2014-11-16 23:13:00	10.044
2014-12-22 04:39:00	7.09152		2014-10-10 15:04:00	7.28465		2015-02-17 08:15:00	4.5733		2014-11-17 00:13:00	10.0514
2014-12-22 04:49:00	7.08999		2014-10-10 16:04:00	7.28921		2015-02-17 08:25:00	4.57017		2014-11-17 01:13:00	10.0484
2014-12-22 04:59:00	7.09152		2014-10-10 17:04:00	7.28769		2015-02-17 08:35:00	4.5686		2014-11-17 02:13:00	10.044
2014-12-22 05:09:00	7.09152		2014-10-10 18:04:00	7.28465		2015-02-17 08:45:00	4.5686		2014-11-17 03:13:00	10.044
2014-12-22 05:19:00	7.09304		2014-10-10 19:04:00	7.28769		2015-02-17 08:55:00	4.56233		2014-11-17 04:13:00	10.044
2014-12-22 05:29:00	7.09456		2014-10-10 20:04:00	7.28465		2015-02-17 09:05:00	4.55919		2014-11-17 05:13:00	10.0425
2014-12-22 05:39:00	7.09608		2014-10-10 21:04:00	7.28769		2015-02-17 09:15:00	4.55919		2014-11-17 06:13:00	10.0484
2014-12-22 05:49:00	7.09456		2014-10-10 22:04:00	7.28921		2015-02-17 09:25:00	4.55762		2014-11-17 07:13:00	10.0425
2014-12-22 05:59:00	7.09304		2014-10-10 23:04:00	7.28617		2015-02-17 09:35:00	4.55762		2014-11-17 08:13:00	10.0469
2014-12-22 06:09:00	7.09152		2014-10-11 00:04:00	7.28769		2015-02-17 09:45:00	4.55449		2014-11-17 09:13:00	10.0454
2014-12-22 06:19:00	7.08999		2014-10-11 01:04:00	7.28769		2015-02-17 09:55:00	4.55606		2014-11-17 10:13:00	10.0425
2014-12-22 06:29:00	7.08847		2014-10-11 02:04:00	7.28465		2015-02-17 10:05:00	4.55606		2014-11-17 11:13:00	10.0484
2014-12-22 06:39:00	7.08999		2014-10-11 03:04:00	7.28465		2015-02-17 10:15:00	4.55606		2014-11-17 12:13:00	10.0454
2014-12-22 06:49:00	7.09152		2014-10-11 04:04:00	7.28617		2015-02-17 10:25:00	4.55606		2014-11-17 13:13:00	10.0499
2014-12-22 06:59:00	7.09152		2014-10-11 05:04:00	7.28314		2015-02-17 10:35:00	4.55449		2014-11-17 14:13:00	10.0484
2014-12-22 07:09:00	7.09152		2014-10-11 06:04:00	7.28617		2015-02-17 10:45:00	4.55449		2014-11-17 15:13:00	10.0484
2014-12-22 07:19:00	7.08999		2014-10-11 07:04:00	7.28769		2015-02-17 10:55:00	4.55292		2014-11-17 16:13:00	10.041
2014-12-22 07:29:00	7.08999		2014-10-11 08:04:00	7.28769		2015-02-17 11:05:00	4.55135		2014-11-17 17:13:00	10.0454
2014-12-22 07:39:00	7.09152		2014-10-11 09:04:00	7.29073		2015-02-17 11:15:00	4.54822		2014-11-17 18:13:00	10.0499
2014-12-22 07:49:00	7.08847		2014-10-11 10:04:00	7.28314		2015-02-17 11:25:00	4.54665		2014-11-17 19:13:00	10.0484
2014-12-22 07:59:00	7.08695		2014-10-11 11:04:00	7.28769		2015-02-17 11:35:00	4.54351		2014-11-17 20:13:00	10.0514
2014-12-22 08:09:00	7.08847		2014-10-11 12:04:00	7.28617		2015-02-17 11:45:00	4.54194		2014-11-17 21:13:00	10.0543
2014-12-22 08:19:00	7.08999		2014-10-11 13:04:00	7.28769		2015-02-17 11:55:00	4.54037		2014-11-17 22:13:00	10.0528
2014-12-22 08:29:00	7.09152		2014-10-11 14:04:00	7.28465		2015-02-17 12:05:00	4.53724		2014-11-17 23:13:00	10.0528
2014-12-22 08:39:00	7.09304		2014-10-11 15:04:00	7.28769		2015-02-17 12:15:00	4.53567		2014-11-18 00:13:00	10.0514
2014-12-22 08:49:00	7.09456		2014-10-11 16:04:00	7.28465		2015-02-17 12:25:00	4.53567		2014-11-18 01:13:00	10.0499
2014-12-22 08:59:00	7.09608		2014-10-11 17:04:00	7.28769		2015-02-17 12:35:00	4.5341		2014-11-18 02:13:00	10.0484
2014-12-22 09:09:00	7.09456		2014-10-11 18:04:00	7.28617		2015-02-17 12:45:00	4.5341		2014-11-18 03:13:00	10.0528
2014-12-22 09:19:00	7.09456		2014-10-11 19:04:00	7.28617		2015-02-17 12:55:00	4.53253		2014-11-18 04:13:00	10.0484
2014-12-22 09:29:00	7.09456		2014-10-11 20:04:00	7.28769		2015-02-17 13:05:00	4.5341		2014-11-18 05:13:00	10.0484
2014-12-22 09:39:00	7.09304		2014-10-11 21:04:00	7.28769		2015-02-17 13:15:00	4.5294		2014-11-18 06:13:00	10.0514
2014-12-22 09:49:00	7.09152		2014-10-11 22:04:00	7.29073		2015-02-17 13:25:00	4.52626		2014-11-18 07:13:00	10.0484
2014-12-22 09:59:00	7.09152		2014-10-11 23:04:00	7.28921		2015-02-17 13:35:00	4.52312		2014-11-18 08:13:00	10.0499
2014-12-22 10:09:00	7.09152		2014-10-12 00:04:00	7.29073		2015-02-17 13:45:00	4.51998		2014-11-18 09:13:00	10.0514
2014-12-22 10:19:00	7.09152		2014-10-12 01:04:00	7.28921		2015-02-17 13:55:00	4.51998		2014-11-18 10:13:00	10.0528
2014-12-22 10:29:00	7.09152		2014-10-12 02:04:00	7.28617		2015-02-17 14:05:00	4.51998		2014-11-18 11:13:00	10.0514
2014-12-22 10:39:00	7.09304		2014-10-12 03:04:00	7.28617		2015-02-17 14:15:00	4.51998		2014-11-18 12:13:00	10.0484
2014-12-22 10:49:00	7.09304		2014-10-12 04:04:00	7.28769		2015-02-17 14:25:00	4.51685		2014-11-18 13:13:00	10.0499
2014-12-22 10:59:00	7.09456		2014-10-12 05:04:00	7.28921		2015-02-17 14:35:00	4.51685		2014-11-18 14:13:00	10.0454
2014-12-22 11:09:00	7.09456		2014-10-12 06:04:00	7.28921		2015-02-17 14:45:00	4.51528		2014-11-18 15:13:00	10.0484
2014-12-22 11:19:00	7.09152		2014-10-12 07:04:00	7.29073		2015-02-17 14:55:00	4.51528		2014-11-18 16:13:00	10.0499
2014-12-22 11:29:00	7.08847		2014-10-12 08:04:00	7.28921		2015-02-17 15:05:00	4.51528		2014-11-18 17:13:00	10.0528
2014-12-22 11:39:00	7.08695		2014-10-12 09:04:00	7.29225		2015-02-17 15:15:00	4.51371		2014-11-18 18:13:00	10.0499
2014-12-22 11:49:00	7.08847		2014-10-12 10:04:00	7.29377		2015-02-17 15:25:00	4.51057		2014-11-18 19:13:00	10.0528
2014-12-22 11:59:00	7.08999		2014-10-12 11:04:00	7.29529		2015-02-17 15:35:00	4.50586		2014-11-18 20:13:00	10.0499
2014-12-22 12:09:00	7.09152		2014-10-12 12:04:00	7.29377		2015-02-17 15:45:00	4.5043		2014-11-18 21:13:00	10.0469
2014-12-22 12:19:00	7.09152		2014-10-12 13:04:00	7.29225		2015-02-17 15:55:00	4.5043		2014-11-18 22:13:00	10.0499
2014-12-22 12:29:00	7.08847		2014-10-12 14:04:00	7.29073		2015-02-17 16:05:00	4.50116		2014-11-18 23:13:00	10.0528
2014-12-22 12:39:00	7.08695		2014-10-12 15:04:00	7.29225		2015-02-17 16:15:00	4.50116		2014-11-19 00:13:00	10.0499
2014-12-22 12:49:00	7.08543		2014-10-12 16:04:00	7.29073		2015-02-17 16:25:00	4.50273		2014-11-19 01:13:00	10.0499
2014-12-22 12:59:00	7.08543		2014-10-12 17:04:00	7.28921		2015-02-17 16:35:00	4.49802		2014-11-19 02:13:00	10.0514
2014-12-22 13:09:00	7.08543		2014-10-12 18:04:00	7.29377		2015-02-17 16:45:00	4.49802		2014-11-19 03:13:00	10.0499
2014-12-22 13:19:00	7.08238		2014-10-12 19:04:00	7.29681		2015-02-17 16:55:00	4.49645		2014-11-19 04:13:00	10.0514
2014-12-22 13:29:00	7.0839		2014-10-12 20:04:00	7.29073		2015-02-17 17:05:00	4.49488		2014-11-19 05:13:00	10.0499
2014-12-22 13:39:00	7.08543		2014-10-12 21:04:00	7.29529		2015-02-17 17:15:00	4.49488		2014-11-19 06:13:00	10.0499
2014-12-22 13:49:00	7.08847		2014-10-12 22:04:00	7.29377		2015-02-17 17:25:00	4.49174		2014-11-19 07:13:00	10.0528
2014-12-22 13:59:00	7.08847		2014-10-12 23:04:00	7.29377		2015-02-17 17:35:00	4.49488		2014-11-19 08:13:00	10.0469
2014-12-22 14:09:00	7.08695		2014-10-13 00:04:00	7.29225		2015-02-17 17:45:00	4.49488		2014-11-19 09:13:00	10.0469
2014-12-22 14:19:00	7.08543		2014-10-13 01:04:00	7.29225		2015-02-17 17:55:00	4.49017		2014-11-19 10:13:00	10.0514
2014-12-22 14:29:00	7.0839		2014-10-13 02:04:00	7.29225		2015-02-17 18:05:00	4.4886		2014-11-19 11:13:00	10.0469
2014-12-22 14:39:00	7.0839		2014-10-13 03:04:00	7.29073		2015-02-17 18:15:00	4.4886		2014-11-19 12:13:00	10.0543
2014-12-22 14:49:00	7.08238		2014-10-13 04:04:00	7.29377		2015-02-17 18:25:00	4.4886		2014-11-19 13:13:00	10.0469
2014-12-22 14:59:00	7.08543		2014-10-13 05:04:00	7.29377		2015-02-17 18:35:00	4.48703		2014-11-19 14:13:00	10.0528
2014-12-22 15:09:00	7.08695		2014-10-13 06:04:00	7.29377		2015-02-17 18:45:00	4.4839		2014-11-19 15:13:00	10.0469
2014-12-22 15:19:00	7.08847		2014-10-13 07:04:00	7.29681		2015-02-17 18:55:00	4.47919		2014-11-19 16:13:00	10.0499
2014-12-22 15:29:00	7.08695		2014-10-13 08:04:00	7.29377		2015-02-17 19:05:00	4.47134		2014-11-19 17:13:00	10.0484
2014-12-22 15:39:00	7.08695		2014-10-13 09:04:00	7.29681		2015-02-17 19:15:00	4.46977		2014-11-19 18:13:00	10.0514
2014-12-22 15:49:00	7.0839		2014-10-13 10:04:00	7.29073		2015-02-17 19:25:00	4.46349		2014-11-19 19:13:00	10.0499
2014-12-22 15:59:00	7.0839		2014-10-13 11:04:00	7.29529		2015-02-17 19:35:00	4.46035		2014-11-19 20:13:00	10.0454
2014-12-22 16:09:00	7.08543		2014-10-13 12:04:00	7.29529		2015-02-17 19:45:00	4.46349		2014-11-19 21:13:00	10.0484
2014-12-22 16:19:00	7.08543		2014-10-13 13:04:00	7.29529		2015-02-17 19:55:00	4.46349		2014-11-19 22:13:00	10.0543
2014-12-22 16:29:00	7.08695		2014-10-13 14:04:00	7.29073		2015-02-17 20:05:00	4.46349		2014-11-19 23:13:00	10.0499
2014-12-22 16:39:00	7.08695		2014-10-13 15:04:00	7.29377		2015-02-17 20:15:00	4.45878		2014-11-20 00:13:00	10.0528
2014-12-22 16:49:00	7.08695		2014-10-13 16:04:00	7.29529		2015-02-17 20:25:00	4.45407		2014-11-20 01:13:00	10.0484
2014-12-22 16:59:00	7.08847		2014-10-13 17:04:00	7.29529		2015-02-17 20:35:00	4.45721		2014-11-20 02:13:00	10.0484
2014-12-22 17:09:00	7.08999		2014-10-13 18:04:00	7.29529		2015-02-17 20:45:00	4.45093		2014-11-20 03:13:00	10.0499
2014-12-22 17:19:00	7.08847		2014-10-13 19:04:00	7.29529		2015-02-17 20:55:00	4.44308		2014-11-20 04:13:00	10.0484
2014-12-22 17:29:00	7.08999		2014-10-13 20:04:00	7.29377		2015-02-17 21:05:00	4.43994		2014-11-20 05:13:00	10.0499
2014-12-22 17:39:00	7.09152		2014-10-13 21:04:00	7.29681		2015-02-17 21:15:00	4.4368		2014-11-20 06:13:00	10.0514
2014-12-22 17:49:00	7.08999		2014-10-13 22:04:00	7.29681		2015-02-17 21:25:00	4.44151		2014-11-20 07:13:00	10.0528
2014-12-22 17:59:00	7.08847		2014-10-13 23:04:00	7.29529		2015-02-17 21:35:00	4.43837		2014-11-20 08:13:00	10.0499
2014-12-22 18:09:00	7.08999		2014-10-14 00:04:00	7.29529		2015-02-17 21:45:00	4.43523		2014-11-20 09:13:00	10.0514
2014-12-22 18:19:00	7.09152		2014-10-14 01:04:00	7.29833		2015-02-17 21:55:00	4.42738		2014-11-20 10:13:00	10.0469
2014-12-22 18:29:00	7.08999		2014-10-14 02:04:00	7.29529		2015-02-17 22:05:00	4.42423		2014-11-20 11:13:00	10.0514
2014-12-22 18:39:00	7.08695		2014-10-14 03:04:00	7.29529		2015-02-17 22:15:00	4.42109		2014-11-20 12:13:00	10.0469
2014-12-22 18:49:00	7.08695		2014-10-14 04:04:00	7.29225		2015-02-17 22:25:00	4.42266		2014-11-20 13:13:00	10.0499
2014-12-22 18:59:00	7.08695		2014-10-14 05:04:00	7.29529		2015-02-17 22:35:00	4.42423		2014-11-20 14:13:00	10.0454
2014-12-22 19:09:00	7.08695		2014-10-14 06:04:00	7.29833		2015-02-17 22:45:00	4.42423		2014-11-20 15:13:00	10.0514
2014-12-22 19:19:00	7.08999		2014-10-14 07:04:00	7.29377		2015-02-17 22:55:00	4.41952		2014-11-20 16:13:00	10.0454
2014-12-22 19:29:00	7.09152		2014-10-14 08:04:00	7.29681		2015-02-17 23:05:00	4.42423		2014-11-20 17:13:00	10.0558
2014-12-22 19:39:00	7.09304		2014-10-14 09:04:00	7.29529		2015-02-17 23:15:00	4.41795		2014-11-20 18:13:00	10.0469
2014-12-22 19:49:00	7.09304		2014-10-14 10:04:00	7.29529		2015-02-17 23:25:00	4.41638		2014-11-20 19:13:00	10.0484
2014-12-22 19:59:00	7.09152		2014-10-14 11:04:00	7.29681		2015-02-17 23:35:00	4.41167		2014-11-20 20:13:00	10.0469
2014-12-22 20:09:00	7.08847		2014-10-14 12:04:00	7.29529		2015-02-17 23:45:00	4.40853		2014-11-20 21:13:00	10.0528
2014-12-22 20:19:00	7.08847		2014-10-14 13:04:00	7.29833		2015-02-17 23:55:00	4.40853		2014-11-20 22:13:00	10.0528
2014-12-22 20:29:00	7.08999		2014-10-14 14:04:00	7.29833		2015-02-18 00:05:00	4.4101		2014-11-20 23:13:00	10.0528
2014-12-22 20:39:00	7.08847		2014-10-14 15:04:00	7.29681		2015-02-18 00:15:00	4.40538		2014-11-21 00:13:00	10.0514
2014-12-22 20:49:00	7.08695		2014-10-14 16:04:00	7.29681		2015-02-18 00:25:00	4.40067		2014-11-21 01:13:00	10.0543
2014-12-22 20:59:00	7.08695		2014-10-14 17:04:00	7.29833		2015-02-18 00:35:00	4.39596		2014-11-21 02:13:00	10.0528
2014-12-22 21:09:00	7.08695		2014-10-14 18:04:00	7.29529		2015-02-18 00:45:00	4.39596		2014-11-21 03:13:00	10.0454
2014-12-22 21:19:00	7.08999		2014-10-14 19:04:00	7.29681		2015-02-18 00:55:00	4.39439		2014-11-21 04:13:00	10.0469
2014-12-22 21:29:00	7.09152		2014-10-14 20:04:00	7.29681		2015-02-18 01:05:00	4.39439		2014-11-21 05:13:00	10.0469
2014-12-22 21:39:00	7.09304		2014-10-14 21:04:00	7.29529		2015-02-18 01:15:00	4.39282		2014-11-21 06:13:00	10.0499
2014-12-22 21:49:00	7.09304		2014-10-14 22:04:00	7.29529		2015-02-18 01:25:00	4.38967		2014-11-21 07:13:00	10.0499
2014-12-22 21:59:00	7.09152		2014-10-14 23:04:00	7.29681		2015-02-18 01:35:00	4.3881		2014-11-21 08:13:00	10.0514
2014-12-22 22:09:00	7.09152		2014-10-15 00:04:00	7.29681		2015-02-18 01:45:00	4.38653		2014-11-21 09:13:00	10.0514
2014-12-22 22:19:00	7.08847		2014-10-15 01:04:00	7.29377		2015-02-18 01:55:00	4.38339		2014-11-21 10:13:00	10.0484
2014-12-22 22:29:00	7.09152		2014-10-15 02:04:00	7.29529		2015-02-18 02:05:00	4.38024		2014-11-21 11:13:00	10.0469
2014-12-22 22:39:00	7.09152		2014-10-15 03:04:00	7.29529		2015-02-18 02:15:00	4.37553		2014-11-21 12:13:00	10.0469
2014-12-22 22:49:00	7.09152		2014-10-15 04:04:00	7.29681		2015-02-18 02:25:00	4.37553		2014-11-21 13:13:00	10.0514
2014-12-22 22:59:00	7.08999		2014-10-15 05:04:00	7.29377		2015-02-18 02:35:00	4.37081		2014-11-21 14:13:00	10.0469
2014-12-22 23:09:00	7.08695		2014-10-15 06:04:00	7.29681		2015-02-18 02:45:00	4.3661		2014-11-21 15:13:00	10.0484
2014-12-22 23:19:00	7.08695		2014-10-15 07:04:00	7.29529		2015-02-18 02:55:00	4.3661		2014-11-21 16:13:00	10.0454
2014-12-22 23:29:00	7.08847		2014-10-15 08:04:00	7.29833		2015-02-18 03:05:00	4.36138		2014-11-21 17:13:00	10.0484
2014-12-22 23:39:00	7.08695		2014-10-15 09:04:00	7.29985		2015-02-18 03:15:00	4.3551		2014-11-21 18:13:00	10.0484
2014-12-22 23:49:00	7.08847		2014-10-15 10:04:00	7.29529		2015-02-18 03:25:00	4.35038		2014-11-21 19:13:00	10.0454
2014-12-22 23:59:00	7.09152		2014-10-15 11:04:00	7.29681		2015-02-18 03:35:00	4.34566		2014-11-21 20:13:00	10.0469
2014-12-23 00:09:00	7.09304		2014-10-15 12:04:00	7.29833		2015-02-18 03:45:00	4.34566		2014-11-21 21:13:00	10.0484
2014-12-23 00:19:00	7.09304		2014-10-15 13:04:00	7.29529		2015-02-18 03:55:00	4.33937		2014-11-21 22:13:00	10.0499
2014-12-23 00:29:00	7.09304		2014-10-15 14:04:00	7.29529		2015-02-18 04:05:00	4.33937		2014-11-21 23:13:00	10.0499
2014-12-23 00:39:00	7.09152		2014-10-15 15:04:00	7.29681		2015-02-18 04:15:00	4.33937		2014-11-22 00:13:00	10.0454
2014-12-23 00:49:00	7.09152		2014-10-15 16:04:00	7.29681		2015-02-18 04:25:00	4.33623		2014-11-22 01:13:00	10.0454
2014-12-23 00:59:00	7.08999		2014-10-15 17:04:00	7.29529		2015-02-18 04:35:00	4.33623		2014-11-22 02:13:00	10.0469
2014-12-23 01:09:00	7.08999		2014-10-15 18:04:00	7.30288		2015-02-18 04:45:00	4.33623		2014-11-22 03:13:00	10.0484
2014-12-23 01:19:00	7.08999		2014-10-15 19:04:00	7.30137		2015-02-18 04:55:00	4.33937		2014-11-22 04:13:00	10.0484
2014-12-23 01:29:00	7.08847		2014-10-15 20:04:00	7.29681		2015-02-18 05:05:00	4.34252		2014-11-22 05:13:00	10.0484
2014-12-23 01:39:00	7.08695		2014-10-15 21:04:00	7.30137		2015-02-18 05:15:00	4.34252		2014-11-22 06:13:00	10.0484
2014-12-23 01:49:00	7.08695		2014-10-15 22:04:00	7.29833		2015-02-18 05:25:00	4.35195		2014-11-22 07:13:00	10.0469
2014-12-23 01:59:00	7.08543		2014-10-15 23:04:00	7.29529		2015-02-18 05:35:00	4.35824		2014-11-22 08:13:00	10.0499
2014-12-23 02:09:00	7.0839		2014-10-16 00:04:00	7.29529		2015-02-18 05:45:00	4.36296		2014-11-22 09:13:00	10.0514
2014-12-23 02:19:00	7.0839		2014-10-16 01:04:00	7.29225		2015-02-18 05:55:00	4.36453		2014-11-22 10:13:00	10.0499
2014-12-23 02:29:00	7.08543		2014-10-16 02:04:00	7.29985		2015-02-18 06:05:00	4.36296		2014-11-22 11:13:00	10.0514
2014-12-23 02:39:00	7.08543		2014-10-16 03:04:00	7.29377		2015-02-18 06:15:00	4.36296		2014-11-22 12:13:00	10.0499
2014-12-23 02:49:00	7.08543		2014-10-16 04:04:00	7.29833		2015-02-18 06:25:00	4.35981		2014-11-22 13:13:00	10.044
2014-12-23 02:59:00	7.08543		2014-10-16 05:04:00	7.29985		2015-02-18 06:35:00	4.35352		2014-11-22 14:13:00	10.044
2014-12-23 03:09:00	7.08543		2014-10-16 06:04:00	7.29681		2015-02-18 06:45:00	4.34881		2014-11-22 15:13:00	10.0454
2014-12-23 03:19:00	7.08695		2014-10-16 07:04:00	7.29833		2015-02-18 06:55:00	4.34252		2014-11-22 16:13:00	10.0499
2014-12-23 03:29:00	7.08695		2014-10-16 08:04:00	7.30137		2015-02-18 07:05:00	4.3378		2014-11-22 17:13:00	10.0484
2014-12-23 03:39:00	7.08847		2014-10-16 09:04:00	7.29985		2015-02-18 07:15:00	4.3378		2014-11-22 18:13:00	10.0514
2014-12-23 03:49:00	7.08847		2014-10-16 10:04:00	7.30288		2015-02-18 07:25:00	4.3378		2014-11-22 19:13:00	10.0484
2014-12-23 03:59:00	7.08847		2014-10-16 11:04:00	7.30288		2015-02-18 07:35:00	4.33937		2014-11-22 20:13:00	10.0499
2014-12-23 04:09:00	7.08847		2014-10-16 12:04:00	7.30137		2015-02-18 07:45:00	4.34095		2014-11-22 21:13:00	10.0514
2014-12-23 04:19:00	7.08847		2014-10-16 13:04:00	7.29833		2015-02-18 07:55:00	4.34095		2014-11-22 22:13:00	10.0499
2014-12-23 04:29:00	7.08999		2014-10-16 14:04:00	7.30137		2015-02-18 08:05:00	4.34095		2014-11-22 23:13:00	10.0514
2014-12-23 04:39:00	7.08847		2014-10-16 15:04:00	7.30137		2015-02-18 08:15:00	4.34252		2014-11-23 00:13:00	10.0454
2014-12-23 04:49:00	7.08695		2014-10-16 16:04:00	7.30137		2015-02-18 08:25:00	4.34095		2014-11-23 01:13:00	10.0499
2014-12-23 04:59:00	7.08543		2014-10-16 17:04:00	7.29985		2015-02-18 08:35:00	4.3378		2014-11-23 02:13:00	10.0469
2014-12-23 05:09:00	7.08543		2014-10-16 18:04:00	7.29985		2015-02-18 08:45:00	4.32994		2014-11-23 03:13:00	10.0499
2014-12-23 05:19:00	7.08543		2014-10-16 19:04:00	7.29833		2015-02-18 08:55:00	4.32679		2014-11-23 04:13:00	10.0484
2014-12-23 05:29:00	7.08543		2014-10-16 20:04:00	7.29985		2015-02-18 09:05:00	4.32837		2014-11-23 05:13:00	10.0469
2014-12-23 05:39:00	7.08543		2014-10-16 21:04:00	7.30137		2015-02-18 09:15:00	4.32679		2014-11-23 06:13:00	10.0499
2014-12-23 05:49:00	7.08695		2014-10-16 22:04:00	7.30288		2015-02-18 09:25:00	4.32365		2014-11-23 07:13:00	10.0469
2014-12-23 05:59:00	7.08847		2014-10-16 23:04:00	7.29833		2015-02-18 09:35:00	4.32837		2014-11-23 08:13:00	10.0469
2014-12-23 06:09:00	7.08999		2014-10-17 00:04:00	7.29833		2015-02-18 09:45:00	4.33466		2014-11-23 09:13:00	10.0484
2014-12-23 06:19:00	7.09152		2014-10-17 01:04:00	7.30137		2015-02-18 09:55:00	4.3378		2014-11-23 10:13:00	10.0484
2014-12-23 06:29:00	7.09304		2014-10-17 02:04:00	7.29985		2015-02-18 10:05:00	4.33937		2014-11-23 11:13:00	10.0484
2014-12-23 06:39:00	7.09456		2014-10-17 03:04:00	7.29985		2015-02-18 10:15:00	4.34095		2014-11-23 12:13:00	10.0454
2014-12-23 06:49:00	7.09456		2014-10-17 04:04:00	7.30137		2015-02-18 10:25:00	4.34252		2014-11-23 13:13:00	10.0425
2014-12-23 06:59:00	7.09456		2014-10-17 05:04:00	7.29985		2015-02-18 10:35:00	4.34566		2014-11-23 14:13:00	10.0454
2014-12-23 07:09:00	7.09456		2014-10-17 06:04:00	7.29985		2015-02-18 10:45:00	4.34724		2014-11-23 15:13:00	10.0454
2014-12-23 07:19:00	7.09304		2014-10-17 07:04:00	7.30137		2015-02-18 10:55:00	4.34724		2014-11-23 16:13:00	10.044
2014-12-23 07:29:00	7.09456		2014-10-17 08:04:00	7.29833		2015-02-18 11:05:00	4.35352		2014-11-23 17:13:00	10.0469
2014-12-23 07:39:00	7.09456		2014-10-17 09:04:00	7.29833		2015-02-18 11:15:00	4.35981		2014-11-23 18:13:00	10.0469
2014-12-23 07:49:00	7.09304		2014-10-17 10:04:00	7.30137		2015-02-18 11:25:00	4.36453		2014-11-23 19:13:00	10.0514
2014-12-23 07:59:00	7.09304		2014-10-17 11:04:00	7.29833		2015-02-18 11:35:00	4.37081		2014-11-23 20:13:00	10.0454
2014-12-23 08:09:00	7.09152		2014-10-17 12:04:00	7.29985		2015-02-18 11:45:00	4.37081		2014-11-23 21:13:00	10.0484
2014-12-23 08:19:00	7.09304		2014-10-17 13:04:00	7.29681		2015-02-18 11:55:00	4.37396		2014-11-23 22:13:00	10.0469
2014-12-23 08:29:00	7.09456		2014-10-17 14:04:00	7.29985		2015-02-18 12:05:00	4.38024		2014-11-23 23:13:00	10.0469
2014-12-23 08:39:00	7.09608		2014-10-17 15:04:00	7.29377		2015-02-18 12:15:00	4.38182		2014-11-24 00:13:00	10.0484
2014-12-23 08:49:00	7.0976		2014-10-17 16:04:00	7.29833		2015-02-18 12:25:00	4.38653		2014-11-24 01:13:00	10.0484
2014-12-23 08:59:00	7.0976		2014-10-17 17:04:00	7.29681		2015-02-18 12:35:00	4.38653		2014-11-24 02:13:00	10.0454
2014-12-23 09:09:00	7.09608		2014-10-17 18:04:00	7.29529		2015-02-18 12:45:00	4.38653		2014-11-24 03:13:00	10.041
2014-12-23 09:19:00	7.09608		2014-10-17 19:04:00	7.29377		2015-02-18 12:55:00	4.38967		2014-11-24 04:13:00	10.0395
2014-12-23 09:29:00	7.09608		2014-10-17 20:04:00	7.30137		2015-02-18 13:05:00	4.39596		2014-11-24 05:13:00	10.0469
2014-12-23 09:39:00	7.0976		2014-10-17 21:04:00	7.28617		2015-02-18 13:15:00	4.39596		2014-11-24 06:13:00	10.0469
2014-12-23 09:49:00	7.0976		2014-10-17 22:04:00	7.2801		2015-02-18 13:25:00	4.39596		2014-11-24 07:13:00	10.0454
2014-12-23 09:59:00	7.09608		2014-10-17 23:04:00	7.27402		2015-02-18 13:35:00	4.3991		2014-11-24 08:13:00	10.0469
2014-12-23 10:09:00	7.09456		2014-10-18 00:04:00	7.27554		2015-02-18 13:45:00	4.40224		2014-11-24 09:13:00	10.0484
2014-12-23 10:19:00	7.09456		2014-10-18 01:04:00	7.27706		2015-02-18 13:55:00	4.40538		2014-11-24 10:13:00	10.044
2014-12-23 10:29:00	7.09456		2014-10-18 02:04:00	7.27706		2015-02-18 14:05:00	4.40853		2014-11-24 11:13:00	10.0499
2014-12-23 10:39:00	7.09608		2014-10-18 03:04:00	7.27858		2015-02-18 14:15:00	4.4101		2014-11-24 12:13:00	10.0469
2014-12-23 10:49:00	7.09608		2014-10-18 04:04:00	7.27858		2015-02-18 14:25:00	4.41638		2014-11-24 13:13:00	10.0425
2014-12-23 10:59:00	7.09608		2014-10-18 05:04:00	7.2801		2015-02-18 14:35:00	4.41795		2014-11-24 14:13:00	10.0454
2014-12-23 11:09:00	7.09456		2014-10-18 06:04:00	7.2801		2015-02-18 14:45:00	4.42109		2014-11-24 15:13:00	10.0425
2014-12-23 11:19:00	7.09304		2014-10-18 07:04:00	7.2801		2015-02-18 14:55:00	4.42581		2014-11-24 16:13:00	10.044
2014-12-23 11:29:00	7.09608		2014-10-18 08:04:00	7.2801		2015-02-18 15:05:00	4.42581		2014-11-24 17:13:00	10.0469
2014-12-23 11:39:00	7.09608		2014-10-18 09:04:00	7.28465		2015-02-18 15:15:00	4.42895		2014-11-24 18:13:00	10.0528
2014-12-23 11:49:00	7.09608		2014-10-18 10:04:00	7.28162		2015-02-18 15:25:00	4.43052		2014-11-24 19:13:00	10.0484
2014-12-23 11:59:00	7.09608		2014-10-18 11:04:00	7.28314		2015-02-18 15:35:00	4.43209		2014-11-24 20:13:00	10.0528
2014-12-23 12:09:00	7.09456		2014-10-18 12:04:00	7.28465		2015-02-18 15:45:00	4.42895		2014-11-24 21:13:00	10.0499
2014-12-23 12:19:00	7.09456		2014-10-18 13:04:00	7.28465		2015-02-18 15:55:00	4.42895		2014-11-24 22:13:00	10.0499
2014-12-23 12:29:00	7.09304		2014-10-18 14:04:00	7.28465		2015-02-18 16:05:00	4.43052		2014-11-24 23:13:00	10.044
2014-12-23 12:39:00	7.09304		2014-10-18 15:04:00	7.28314		2015-02-18 16:15:00	4.43052		2014-11-25 00:13:00	10.041
2014-12-23 12:49:00	7.09456		2014-10-18 16:04:00	7.28465		2015-02-18 16:25:00	4.43366		2014-11-25 01:13:00	10.041
2014-12-23 12:59:00	7.09456		2014-10-18 17:04:00	7.28162		2015-02-18 16:35:00	4.43523		2014-11-25 02:13:00	10.0395
2014-12-23 13:09:00	7.09456		2014-10-18 18:04:00	7.28617		2015-02-18 16:45:00	4.43366		2014-11-25 03:13:00	10.0499
2014-12-23 13:19:00	7.09456		2014-10-18 19:04:00	7.28465		2015-02-18 16:55:00	4.43366		2014-11-25 04:13:00	10.0425
2014-12-23 13:29:00	7.09304		2014-10-18 20:04:00	7.28617		2015-02-18 17:05:00	4.43523		2014-11-25 05:13:00	10.0454
2014-12-23 13:39:00	7.09304		2014-10-18 21:04:00	7.28617		2015-02-18 17:15:00	4.4368		2014-11-25 06:13:00	10.0395
2014-12-23 13:49:00	7.09152		2014-10-18 22:04:00	7.28769		2015-02-18 17:25:00	4.4368		2014-11-25 07:13:00	10.0454
2014-12-23 13:59:00	7.09152		2014-10-18 23:04:00	7.28769		2015-02-18 17:35:00	4.4368		2014-11-25 08:13:00	10.041
2014-12-23 14:09:00	7.09152		2014-10-19 00:04:00	7.28769		2015-02-18 17:45:00	4.43837		2014-11-25 09:13:00	10.0425
2014-12-23 14:19:00	7.09152		2014-10-19 01:04:00	7.28465		2015-02-18 17:55:00	4.43837		2014-11-25 10:13:00	10.041
2014-12-23 14:29:00	7.08847		2014-10-19 02:04:00	7.28769		2015-02-18 18:05:00	4.43523		2014-11-25 11:13:00	10.044
2014-12-23 14:39:00	7.08999		2014-10-19 03:04:00	7.28314		2015-02-18 18:15:00	4.43209		2014-11-25 12:13:00	10.038
2014-12-23 14:49:00	7.08999		2014-10-19 04:04:00	7.28465		2015-02-18 18:25:00	4.42738		2014-11-25 13:13:00	10.0425
2014-12-23 14:59:00	7.09152		2014-10-19 05:04:00	7.28617		2015-02-18 18:35:00	4.42423		2014-11-25 14:13:00	10.038
2014-12-23 15:09:00	7.09152		2014-10-19 06:04:00	7.28617		2015-02-18 18:45:00	4.42109		2014-11-25 15:13:00	10.0425
2014-12-23 15:19:00	7.08999		2014-10-19 07:04:00	7.28617		2015-02-18 18:55:00	4.42109		2014-11-25 16:13:00	10.0425
2014-12-23 15:29:00	7.08999		2014-10-19 08:04:00	7.28769		2015-02-18 19:05:00	4.41952		2014-11-25 17:13:00	10.0395
2014-12-23 15:39:00	7.09304		2014-10-19 09:04:00	7.28921		2015-02-18 19:15:00	4.42266		2014-11-25 18:13:00	10.0425
2014-12-23 15:49:00	7.09304		2014-10-19 10:04:00	7.28617		2015-02-18 19:25:00	4.42423		2014-11-25 19:13:00	10.0469
2014-12-23 15:59:00	7.09304		2014-10-19 11:04:00	7.28921		2015-02-18 19:35:00	4.42266		2014-11-25 20:13:00	10.0395
2014-12-23 16:09:00	7.09304		2014-10-19 12:04:00	7.28769		2015-02-18 19:45:00	4.42423		2014-11-25 21:13:00	10.0454
2014-12-23 16:19:00	7.09304		2014-10-19 13:04:00	7.28769		2015-02-18 19:55:00	4.41795		2014-11-25 22:13:00	10.044
2014-12-23 16:29:00	7.09608		2014-10-19 14:04:00	7.28769		2015-02-18 20:05:00	4.41481		2014-11-25 23:13:00	10.044
2014-12-23 16:39:00	7.09608		2014-10-19 15:04:00	7.28921		2015-02-18 20:15:00	4.41481		2014-11-26 00:13:00	10.0469
2014-12-23 16:49:00	7.09608		2014-10-19 16:04:00	7.28465		2015-02-18 20:25:00	4.41324		2014-11-26 01:13:00	10.044
2014-12-23 16:59:00	7.09608		2014-10-19 17:04:00	7.28617		2015-02-18 20:35:00	4.4101		2014-11-26 02:13:00	10.041
2014-12-23 17:09:00	7.09608		2014-10-19 18:04:00	7.28617		2015-02-18 20:45:00	4.40538		2014-11-26 03:13:00	10.0425
2014-12-23 17:19:00	7.09608		2014-10-19 19:04:00	7.28921		2015-02-18 20:55:00	4.40224		2014-11-26 04:13:00	10.0425
2014-12-23 17:29:00	7.09456		2014-10-19 20:04:00	7.28921		2015-02-18 21:05:00	4.40067		2014-11-26 05:13:00	10.0425
2014-12-23 17:39:00	7.09456		2014-10-19 21:04:00	7.29073		2015-02-18 21:15:00	4.39753		2014-11-26 06:13:00	10.044
2014-12-23 17:49:00	7.09304		2014-10-19 22:04:00	7.29073		2015-02-18 21:25:00	4.39596		2014-11-26 07:13:00	10.0425
2014-12-23 17:59:00	7.09304		2014-10-19 23:04:00	7.28769		2015-02-18 21:35:00	4.39439		2014-11-26 08:13:00	10.0454
2014-12-23 18:09:00	7.09304		2014-10-20 00:04:00	7.28921		2015-02-18 21:45:00	4.39439		2014-11-26 09:13:00	10.044
2014-12-23 18:19:00	7.09304		2014-10-20 01:04:00	7.28921		2015-02-18 21:55:00	4.39282		2014-11-26 10:13:00	10.0454
2014-12-23 18:29:00	7.09304		2014-10-20 02:04:00	7.28617		2015-02-18 22:05:00	4.39439		2014-11-26 11:13:00	10.044
2014-12-23 18:39:00	7.09152		2014-10-20 03:04:00	7.28769		2015-02-18 22:15:00	4.39439		2014-11-26 12:13:00	10.041
2014-12-23 18:49:00	7.09152		2014-10-20 04:04:00	7.28769		2015-02-18 22:25:00	4.39439		2014-11-26 13:13:00	10.041
2014-12-23 18:59:00	7.09152		2014-10-20 05:04:00	7.28465		2015-02-18 22:35:00	4.39596		2014-11-26 14:13:00	10.044
2014-12-23 19:09:00	7.09152		2014-10-20 06:04:00	7.28769		2015-02-18 22:45:00	4.39753		2014-11-26 15:13:00	10.0469
2014-12-23 19:19:00	7.09456		2014-10-20 07:04:00	7.28921		2015-02-18 22:55:00	4.39753		2014-11-26 16:13:00	10.041
2014-12-23 19:29:00	7.09608		2014-10-20 08:04:00	7.28921		2015-02-18 23:05:00	4.39596		2014-11-26 17:13:00	10.0425
2014-12-23 19:39:00	7.0976		2014-10-20 09:04:00	7.28921		2015-02-18 23:15:00	4.39753		2014-11-26 18:13:00	10.0425
2014-12-23 19:49:00	7.09608		2014-10-20 10:04:00	7.29225		2015-02-18 23:25:00	4.3991		2014-11-26 19:13:00	10.0425
2014-12-23 19:59:00	7.09608		2014-10-20 11:04:00	7.29073		2015-02-18 23:35:00	4.39753		2014-11-26 20:13:00	10.0425
2014-12-23 20:09:00	7.09456		2014-10-20 12:04:00	7.29377		2015-02-18 23:45:00	4.3991		2014-11-26 21:13:00	10.0454
2014-12-23 20:19:00	7.09304		2014-10-20 13:04:00	7.28769		2015-02-18 23:55:00	4.3991		2014-11-26 22:13:00	10.0425
2014-12-23 20:29:00	7.09608		2014-10-20 14:04:00	7.28769		2015-02-19 00:05:00	4.39753		2014-11-26 23:13:00	10.0469
2014-12-23 20:39:00	7.09608		2014-10-20 15:04:00	7.29073		2015-02-19 00:15:00	4.39596		2014-11-27 00:13:00	10.0454
2014-12-23 20:49:00	7.09456		2014-10-20 16:04:00	7.29073		2015-02-19 00:25:00	4.38967		2014-11-27 01:13:00	10.044
2014-12-23 20:59:00	7.09304		2014-10-20 17:04:00	7.28921		2015-02-19 00:35:00	4.38653		2014-11-27 02:13:00	10.0425
2014-12-23 21:09:00	7.09456		2014-10-20 18:04:00	7.28921		2015-02-19 00:45:00	4.38967		2014-11-27 03:13:00	10.041
2014-12-23 21:19:00	7.09456		2014-10-20 19:04:00	7.29073		2015-02-19 00:55:00	4.39282		2014-11-27 04:13:00	10.0425
2014-12-23 21:29:00	7.09456		2014-10-20 20:04:00	7.28921		2015-02-19 01:05:00	4.3881		2014-11-27 05:13:00	10.0395
2014-12-23 21:39:00	7.09304		2014-10-20 21:04:00	7.28769		2015-02-19 01:15:00	4.3881		2014-11-27 06:13:00	10.0425
2014-12-23 21:49:00	7.09304		2014-10-20 22:04:00	7.29073		2015-02-19 01:25:00	4.38967		2014-11-27 07:13:00	10.041
2014-12-23 21:59:00	7.09304		2014-10-20 23:04:00	7.29681		2015-02-19 01:35:00	4.39439		2014-11-27 08:13:00	10.0425
2014-12-23 22:09:00	7.09304		2014-10-21 00:04:00	7.29225		2015-02-19 01:45:00	4.39282		2014-11-27 09:13:00	10.0454
2014-12-23 22:19:00	7.09456		2014-10-21 01:04:00	7.29073		2015-02-19 01:55:00	4.39124		2014-11-27 10:13:00	10.0425
2014-12-23 22:29:00	7.09456		2014-10-21 02:04:00	7.29073		2015-02-19 02:05:00	4.39282		2014-11-27 11:13:00	10.044
2014-12-23 22:39:00	7.09608		2014-10-21 03:04:00	7.28921		2015-02-19 02:15:00	4.39124		2014-11-27 12:13:00	10.041
2014-12-23 22:49:00	7.09456		2014-10-21 04:04:00	7.29073		2015-02-19 02:25:00	4.39282		2014-11-27 13:13:00	10.044
2014-12-23 22:59:00	7.09608		2014-10-21 05:04:00	7.28921		2015-02-19 02:35:00	4.39439		2014-11-27 14:13:00	10.041
2014-12-23 23:09:00	7.09456		2014-10-21 06:04:00	7.28617		2015-02-19 02:45:00	4.39124		2014-11-27 15:13:00	10.041
2014-12-23 23:19:00	7.09456		2014-10-21 07:04:00	7.28921		2015-02-19 02:55:00	4.39282		2014-11-27 16:13:00	10.0425
2014-12-23 23:29:00	7.09456		2014-10-21 08:04:00	7.29073		2015-02-19 03:05:00	4.39282		2014-11-27 17:13:00	10.044
2014-12-23 23:39:00	7.09304		2014-10-21 09:04:00	7.28921		2015-02-19 03:15:00	4.38967		2014-11-27 18:13:00	10.044
2014-12-23 23:49:00	7.09304		2014-10-21 10:04:00	7.29225		2015-02-19 03:25:00	4.39124		2014-11-27 19:13:00	10.0454
2014-12-23 23:59:00	7.09304		2014-10-21 11:04:00	7.29073		2015-02-19 03:35:00	4.39124		2014-11-27 20:13:00	10.0469
2014-12-24 00:09:00	7.09304		2014-10-21 12:04:00	7.29073		2015-02-19 03:45:00	4.38967		2014-11-27 21:13:00	10.044
2014-12-24 00:19:00	7.09456		2014-10-21 13:04:00	7.28921		2015-02-19 03:55:00	4.3881		2014-11-27 22:13:00	10.0425
2014-12-24 00:29:00	7.09304		2014-10-21 14:04:00	7.29073		2015-02-19 04:05:00	4.3881		2014-11-27 23:13:00	10.044
2014-12-24 00:39:00	7.09304		2014-10-21 15:04:00	7.29073		2015-02-19 04:15:00	4.38496		2014-11-28 00:13:00	10.0425
2014-12-24 00:49:00	7.09456		2014-10-21 16:04:00	7.28921		2015-02-19 04:25:00	4.38967		2014-11-28 01:13:00	10.0395
2014-12-24 00:59:00	7.09456		2014-10-21 17:04:00	7.29073		2015-02-19 04:35:00	4.39753		2014-11-28 02:13:00	10.041
2014-12-24 01:09:00	7.09456		2014-10-21 18:04:00	7.29073		2015-02-19 04:45:00	4.39596		2014-11-28 03:13:00	10.041
2014-12-24 01:19:00	7.09304		2014-10-21 19:04:00	7.29377		2015-02-19 04:55:00	4.39753		2014-11-28 04:13:00	10.0425
2014-12-24 01:29:00	7.09304		2014-10-21 20:04:00	7.29225		2015-02-19 05:05:00	4.3991		2014-11-28 05:13:00	10.0425
2014-12-24 01:39:00	7.09152		2014-10-21 21:04:00	7.28921		2015-02-19 05:15:00	4.40067		2014-11-28 06:13:00	10.0425
2014-12-24 01:49:00	7.09152		2014-10-21 22:04:00	7.29225		2015-02-19 05:25:00	4.40067		2014-11-28 07:13:00	10.044
2014-12-24 01:59:00	7.08999		2014-10-21 23:04:00	7.29225		2015-02-19 05:35:00	4.40224		2014-11-28 08:13:00	10.041
2014-12-24 02:09:00	7.08847		2014-10-22 00:04:00	7.28921		2015-02-19 05:45:00	4.40381		2014-11-28 09:13:00	10.0454
2014-12-24 02:19:00	7.08695		2014-10-22 01:04:00	7.29073		2015-02-19 05:55:00	4.3991		2014-11-28 10:13:00	10.0425
2014-12-24 02:29:00	7.08847		2014-10-22 02:04:00	7.29073		2015-02-19 06:05:00	4.39439		2014-11-28 11:13:00	10.041
2014-12-24 02:39:00	7.08999		2014-10-22 03:04:00	7.28769		2015-02-19 06:15:00	4.39124		2014-11-28 12:13:00	10.041
2014-12-24 02:49:00	7.08999		2014-10-22 04:04:00	7.29225		2015-02-19 06:25:00	4.39596		2014-11-28 13:13:00	10.041
2014-12-24 02:59:00	7.08999		2014-10-22 05:04:00	7.29225		2015-02-19 06:35:00	4.3991		2014-11-28 14:13:00	10.0395
2014-12-24 03:09:00	7.09152		2014-10-22 06:04:00	7.29073		2015-02-19 06:45:00	4.40224		2014-11-28 15:13:00	10.038
2014-12-24 03:19:00	7.09304		2014-10-22 07:04:00	7.29225		2015-02-19 06:55:00	4.40696		2014-11-28 16:13:00	10.041
2014-12-24 03:29:00	7.09456		2014-10-22 08:04:00	7.28921		2015-02-19 07:05:00	4.40696		2014-11-28 17:13:00	10.0425
2014-12-24 03:39:00	7.09456		2014-10-22 09:04:00	7.28921		2015-02-19 07:15:00	4.40853		2014-11-28 18:13:00	10.041
2014-12-24 03:49:00	7.09456		2014-10-22 10:04:00	7.29225		2015-02-19 07:25:00	4.40538		2014-11-28 19:13:00	10.041
2014-12-24 03:59:00	7.09456		2014-10-22 11:04:00	7.29073		2015-02-19 07:35:00	4.40538		2014-11-28 20:13:00	10.044
2014-12-24 04:09:00	7.09304		2014-10-22 12:04:00	7.28617		2015-02-19 07:45:00	4.40538		2014-11-28 21:13:00	10.0395
2014-12-24 04:19:00	7.09304		2014-10-22 13:04:00	7.28921		2015-02-19 07:55:00	4.40853		2014-11-28 22:13:00	10.041
2014-12-24 04:29:00	7.09152		2014-10-22 14:04:00	7.28921		2015-02-19 08:05:00	4.40853		2014-11-28 23:13:00	10.041
2014-12-24 04:39:00	7.09152		2014-10-22 15:04:00	7.28921		2015-02-19 08:15:00	4.40381		2014-11-29 00:13:00	10.0425
2014-12-24 04:49:00	7.08999		2014-10-22 16:04:00	7.28769		2015-02-19 08:25:00	4.40224		2014-11-29 01:13:00	10.038
2014-12-24 04:59:00	7.08999		2014-10-22 17:04:00	7.29073		2015-02-19 08:35:00	4.40381		2014-11-29 02:13:00	10.038
2014-12-24 05:09:00	7.09152		2014-10-22 18:04:00	7.28921		2015-02-19 08:45:00	4.40538		2014-11-29 03:13:00	10.0395
2014-12-24 05:19:00	7.09152		2014-10-22 19:04:00	7.29073		2015-02-19 08:55:00	4.40538		2014-11-29 04:13:00	10.038
2014-12-24 05:29:00	7.09152		2014-10-22 20:04:00	7.29073		2015-02-19 09:05:00	4.40381		2014-11-29 05:13:00	10.041
2014-12-24 05:39:00	7.09152		2014-10-22 21:04:00	7.28921		2015-02-19 09:15:00	4.40538		2014-11-29 06:13:00	10.0395
2014-12-24 05:49:00	7.09152		2014-10-22 22:04:00	7.29073		2015-02-19 09:25:00	4.40696		2014-11-29 07:13:00	10.0395
2014-12-24 05:59:00	7.08999		2014-10-22 23:04:00	7.28162		2015-02-19 09:35:00	4.40853		2014-11-29 08:13:00	10.041
2014-12-24 06:09:00	7.09152		2014-10-23 00:04:00	7.2801		2015-02-19 09:45:00	4.41167		2014-11-29 09:13:00	10.041
2014-12-24 06:19:00	7.09304		2014-10-23 01:04:00	7.28465		2015-02-19 09:55:00	4.4101		2014-11-29 10:13:00	10.041
2014-12-24 06:29:00	7.09304		2014-10-23 02:04:00	7.28465		2015-02-19 10:05:00	4.41324		2014-11-29 11:13:00	10.0395
2014-12-24 06:39:00	7.09304		2014-10-23 03:04:00	7.29073		2015-02-19 10:15:00	4.41324		2014-11-29 12:13:00	10.0351
2014-12-24 06:49:00	7.09152		2014-10-23 04:04:00	7.29225		2015-02-19 10:25:00	4.41481		2014-11-29 13:13:00	10.0395
2014-12-24 06:59:00	7.09304		2014-10-23 05:04:00	7.29529		2015-02-19 10:35:00	4.41795		2014-11-29 14:13:00	10.0395
2014-12-24 07:09:00	7.09456		2014-10-23 06:04:00	7.29377		2015-02-19 10:45:00	4.42581		2014-11-29 15:13:00	10.0365
2014-12-24 07:19:00	7.09456		2014-10-23 07:04:00	7.29225		2015-02-19 10:55:00	4.42895		2014-11-29 16:13:00	10.038
2014-12-24 07:29:00	7.09456		2014-10-23 08:04:00	7.29681		2015-02-19 11:05:00	4.43366		2014-11-29 17:13:00	10.0395
2014-12-24 07:39:00	7.09456		2014-10-23 09:04:00	7.29833		2015-02-19 11:15:00	4.4368		2014-11-29 18:13:00	10.038
2014-12-24 07:49:00	7.09456		2014-10-23 10:04:00	7.29985		2015-02-19 11:25:00	4.44308		2014-11-29 19:13:00	10.0395
2014-12-24 07:59:00	7.09456		2014-10-23 11:04:00	7.30137		2015-02-19 11:35:00	4.44465		2014-11-29 20:13:00	10.038
2014-12-24 08:09:00	7.09456		2014-10-23 12:04:00	7.30744		2015-02-19 11:45:00	4.44779		2014-11-29 21:13:00	10.0395
2014-12-24 08:19:00	7.09608		2014-10-23 13:04:00	7.3044		2015-02-19 11:55:00	4.45407		2014-11-29 22:13:00	10.038
2014-12-24 08:29:00	7.09608		2014-10-23 14:04:00			2015-02-19 12:05:00	4.45564		2014-11-29 23:13:00	10.0365
2014-12-24 08:39:00	7.09456		2014-10-23 15:04:00			2015-02-19 12:15:00	4.46035		2014-11-30 00:13:00	10.041
2014-12-24 08:49:00	7.09456		2014-10-23 16:04:00			2015-02-19 12:25:00	4.46192		2014-11-30 01:13:00	10.0365
2014-12-24 08:59:00	7.09456		2014-10-23 17:04:00			2015-02-19 12:35:00	4.46506		2014-11-30 02:13:00	10.0365
2014-12-24 09:09:00	7.0976		2014-10-23 18:04:00			2015-02-19 12:45:00	4.4682		2014-11-30 03:13:00	10.038
2014-12-24 09:19:00	7.09456		2014-10-23 19:04:00			2015-02-19 12:55:00	4.46977		2014-11-30 04:13:00	10.038
2014-12-24 09:29:00	7.09456		2014-10-23 20:04:00			2015-02-19 13:05:00	4.47291		2014-11-30 05:13:00	10.038
2014-12-24 09:39:00	7.09608		2014-10-23 21:04:00			2015-02-19 13:15:00	4.47605		2014-11-30 06:13:00	10.041
2014-12-24 09:49:00	7.0976		2014-10-23 22:04:00			2015-02-19 13:25:00	4.47605		2014-11-30 07:13:00	10.041
2014-12-24 09:59:00	7.0976		2014-10-23 23:04:00			2015-02-19 13:35:00	4.47762		2014-11-30 08:13:00	10.038
2014-12-24 10:09:00	7.0976		2014-10-24 00:04:00	7.33326		2015-02-19 13:45:00	4.48076		2014-11-30 09:13:00	10.0395
2014-12-24 10:19:00	7.09913		2014-10-24 01:04:00	7.33022		2015-02-19 13:55:00	4.48233		2014-11-30 10:13:00	10.038
2014-12-24 10:29:00	7.09913		2014-10-24 02:04:00	7.33022		2015-02-19 14:05:00	4.48703		2014-11-30 11:13:00	10.0395
2014-12-24 10:39:00	7.0976		2014-10-24 03:04:00	7.32567		2015-02-19 14:15:00	4.48547		2014-11-30 12:13:00	10.041
2014-12-24 10:49:00	7.0976		2014-10-24 04:04:00	7.31959		2015-02-19 14:25:00	4.48703		2014-11-30 13:13:00	10.0395
2014-12-24 10:59:00	7.0976		2014-10-24 05:04:00	7.31807		2015-02-19 14:35:00	4.49017		2014-11-30 14:13:00	10.0365
2014-12-24 11:09:00	7.09304		2014-10-24 06:04:00	7.31807		2015-02-19 14:45:00	4.49331		2014-11-30 15:13:00	10.0395
2014-12-24 11:19:00	7.08543		2014-10-24 07:04:00	7.31655		2015-02-19 14:55:00	4.49488		2014-11-30 16:13:00	10.0395
2014-12-24 11:29:00	7.08238		2014-10-24 08:04:00	7.31352		2015-02-19 15:05:00	4.49802		2014-11-30 17:13:00	10.041
2014-12-24 11:39:00	7.08086		2014-10-24 09:04:00	7.31352		2015-02-19 15:15:00	4.50273		2014-11-30 18:13:00	10.038
2014-12-24 11:49:00	7.07781		2014-10-24 10:04:00	7.312		2015-02-19 15:25:00	4.50586		2014-11-30 19:13:00	10.0395
2014-12-24 11:59:00	7.07781		2014-10-24 11:04:00	7.31048		2015-02-19 15:35:00	4.50743		2014-11-30 20:13:00	10.041
2014-12-24 12:09:00	7.07781		2014-10-24 12:04:00	7.3044		2015-02-19 15:45:00	4.50743		2014-11-30 21:13:00	10.0395
2014-12-24 12:19:00	7.07781		2014-10-24 13:04:00	7.3044		2015-02-19 15:55:00	4.50743		2014-11-30 22:13:00	10.038
2014-12-24 12:29:00	7.07781		2014-10-24 14:04:00	7.29833		2015-02-19 16:05:00	4.51057		2014-11-30 23:13:00	10.041
2014-12-24 12:39:00	7.07629		2014-10-24 15:04:00	7.29681		2015-02-19 16:15:00	4.51371		2014-12-01 00:13:00	10.041
2014-12-24 12:49:00	7.07934		2014-10-24 16:04:00	7.29529		2015-02-19 16:25:00	4.51528		2014-12-01 01:13:00	10.041
2014-12-24 12:59:00	7.07629		2014-10-24 17:04:00	7.29681		2015-02-19 16:35:00	4.51685		2014-12-01 02:13:00	10.0365
2014-12-24 13:09:00	7.07629		2014-10-24 18:04:00	7.29681		2015-02-19 16:45:00	4.51371		2014-12-01 03:13:00	10.038
2014-12-24 13:19:00	7.07629		2014-10-24 19:04:00	7.29681		2015-02-19 16:55:00	4.51528		2014-12-01 04:13:00	10.0395
2014-12-24 13:29:00	7.07629		2014-10-24 20:04:00	7.29225		2015-02-19 17:05:00	4.51685		2014-12-01 05:13:00	10.0395
2014-12-24 13:39:00	7.07477		2014-10-24 21:04:00	7.29377		2015-02-19 17:15:00	4.51842		2014-12-01 06:13:00	10.041
2014-12-24 13:49:00	7.07477		2014-10-24 22:04:00	7.28921		2015-02-19 17:25:00	4.51998		2014-12-01 07:13:00	10.0425
2014-12-24 13:59:00	7.07477		2014-10-24 23:04:00	7.28921		2015-02-19 17:35:00	4.52155		2014-12-01 08:13:00	10.041
2014-12-24 14:09:00	7.07477		2014-10-25 00:04:00	7.29377		2015-02-19 17:45:00	4.52155		2014-12-01 09:13:00	10.0425
2014-12-24 14:19:00	7.07629		2014-10-25 01:04:00	7.29073		2015-02-19 17:55:00	4.51998		2014-12-01 10:13:00	10.0425
2014-12-24 14:29:00	7.07629		2014-10-25 02:04:00	7.29377		2015-02-19 18:05:00	4.52312		2014-12-01 11:13:00	10.041
2014-12-24 14:39:00	7.07629		2014-10-25 03:04:00	7.28921		2015-02-19 18:15:00	4.52155		2014-12-01 12:13:00	10.0395
2014-12-24 14:49:00	7.07781		2014-10-25 04:04:00	7.28921		2015-02-19 18:25:00	4.52312		2014-12-01 13:13:00	10.038
2014-12-24 14:59:00	7.07781		2014-10-25 05:04:00	7.28617		2015-02-19 18:35:00	4.52469		2014-12-01 14:13:00	10.038
2014-12-24 15:09:00	7.07781		2014-10-25 06:04:00	7.29073		2015-02-19 18:45:00	4.52626		2014-12-01 15:13:00	10.038
2014-12-24 15:19:00	7.07781		2014-10-25 07:04:00	7.29529		2015-02-19 18:55:00	4.52469		2014-12-01 16:13:00	10.0395
2014-12-24 15:29:00	7.07781		2014-10-25 08:04:00	7.29073		2015-02-19 19:05:00	4.52626		2014-12-01 17:13:00	10.038
2014-12-24 15:39:00	7.07934		2014-10-25 09:04:00	7.29225		2015-02-19 19:15:00	4.5294		2014-12-01 18:13:00	10.041
2014-12-24 15:49:00	7.07934		2014-10-25 10:04:00	7.29225		2015-02-19 19:25:00	4.53096		2014-12-01 19:13:00	10.041
2014-12-24 15:59:00	7.07934		2014-10-25 11:04:00	7.29073		2015-02-19 19:35:00	4.53096		2014-12-01 20:13:00	10.0395
2014-12-24 16:09:00	7.08086		2014-10-25 12:04:00	7.29377		2015-02-19 19:45:00	4.5294		2014-12-01 21:13:00	10.038
2014-12-24 16:19:00	7.08086		2014-10-25 13:04:00	7.29073		2015-02-19 19:55:00	4.53096		2014-12-01 22:13:00	10.0336
2014-12-24 16:29:00	7.08086		2014-10-25 14:04:00	7.29073		2015-02-19 20:05:00	4.5294		2014-12-01 23:13:00	10.0336
2014-12-24 16:39:00	7.08086		2014-10-25 15:04:00	7.28921		2015-02-19 20:15:00	4.53096		2014-12-02 00:13:00	10.0365
2014-12-24 16:49:00	7.08086		2014-10-25 16:04:00	7.28921		2015-02-19 20:25:00	4.53096		2014-12-02 01:13:00	10.0336
2014-12-24 16:59:00	7.08086		2014-10-25 17:04:00	7.29377		2015-02-19 20:35:00	4.5294		2014-12-02 02:13:00	10.038
2014-12-24 17:09:00	7.08086		2014-10-25 18:04:00	7.28921		2015-02-19 20:45:00	4.5294		2014-12-02 03:13:00	10.0291
2014-12-24 17:19:00	7.08086		2014-10-25 19:04:00	7.29073		2015-02-19 20:55:00	4.5294		2014-12-02 04:13:00	10.0321
2014-12-24 17:29:00	7.08086		2014-10-25 20:04:00	7.28921		2015-02-19 21:05:00	4.52783		2014-12-02 05:13:00	10.0351
2014-12-24 17:39:00	7.08086		2014-10-25 21:04:00	7.29225		2015-02-19 21:15:00	4.5294		2014-12-02 06:13:00	10.0395
2014-12-24 17:49:00	7.07934		2014-10-25 22:04:00	7.29225		2015-02-19 21:25:00	4.53253		2014-12-02 07:13:00	10.038
2014-12-24 17:59:00	7.08086		2014-10-25 23:04:00	7.29225		2015-02-19 21:35:00	4.53253		2014-12-02 08:13:00	10.0365
2014-12-24 18:09:00	7.08086		2014-10-26 00:04:00	7.29073		2015-02-19 21:45:00	4.5341		2014-12-02 09:13:00	10.0365
2014-12-24 18:19:00	7.08086		2014-10-26 01:04:00	7.29225		2015-02-19 21:55:00	4.5341		2014-12-02 10:13:00	10.041
2014-12-24 18:29:00	7.08238		2014-10-26 02:04:00	7.29073		2015-02-19 22:05:00	4.53567		2014-12-02 11:13:00	10.0365
2014-12-24 18:39:00	7.08238		2014-10-26 03:04:00	7.28921		2015-02-19 22:15:00	4.53567		2014-12-02 12:13:00	10.038
2014-12-24 18:49:00	7.08238		2014-10-26 04:04:00	7.28921		2015-02-19 22:25:00	4.53724		2014-12-02 13:13:00	10.0395
2014-12-24 18:59:00	7.0839		2014-10-26 05:04:00	7.28921		2015-02-19 22:35:00	4.53881		2014-12-02 14:13:00	10.038
2014-12-24 19:09:00	7.0839		2014-10-26 06:04:00	7.28769		2015-02-19 22:45:00	4.54194		2014-12-02 15:13:00	10.0425
2014-12-24 19:19:00	7.08543		2014-10-26 07:04:00	7.28769		2015-02-19 22:55:00	4.54194		2014-12-02 16:13:00	10.0395
2014-12-24 19:29:00	7.08695		2014-10-26 08:04:00	7.28921		2015-02-19 23:05:00	4.54508		2014-12-02 17:13:00	10.0395
2014-12-24 19:39:00	7.08695		2014-10-26 09:04:00	7.28921		2015-02-19 23:15:00	4.54665		2014-12-02 18:13:00	10.038
2014-12-24 19:49:00	7.0839		2014-10-26 10:04:00	7.28769		2015-02-19 23:25:00	4.54508		2014-12-02 19:13:00	10.0425
2014-12-24 19:59:00	7.08543		2014-10-26 11:04:00	7.28921		2015-02-19 23:35:00	4.54822		2014-12-02 20:13:00	10.041
2014-12-24 20:09:00	7.08238		2014-10-26 12:04:00	7.28921		2015-02-19 23:45:00	4.54822		2014-12-02 21:13:00	10.0425
2014-12-24 20:19:00	7.0839		2014-10-26 13:04:00	7.28769		2015-02-19 23:55:00	4.55292		2014-12-02 22:13:00	10.0395
2014-12-24 20:29:00	7.08238		2014-10-26 14:04:00	7.28769		2015-02-20 00:05:00	4.55292		2014-12-02 23:13:00	10.041
2014-12-24 20:39:00	7.08238		2014-10-26 15:04:00	7.28769		2015-02-20 00:15:00	4.55449		2014-12-03 00:13:00	10.0395
2014-12-24 20:49:00	7.08238		2014-10-26 16:04:00	7.28921		2015-02-20 00:25:00	4.55606		2014-12-03 01:13:00	10.041
2014-12-24 20:59:00	7.08238		2014-10-26 17:04:00	7.29073		2015-02-20 00:35:00	4.55606		2014-12-03 02:13:00	10.0425
2014-12-24 21:09:00	7.08086		2014-10-26 18:04:00	7.28617		2015-02-20 00:45:00	4.55919		2014-12-03 03:13:00	10.0395
2014-12-24 21:19:00	7.08086		2014-10-26 19:04:00	7.28769		2015-02-20 00:55:00	4.56076		2014-12-03 04:13:00	10.041
2014-12-24 21:29:00	7.08086		2014-10-26 20:04:00	7.28921		2015-02-20 01:05:00	4.56233		2014-12-03 05:13:00	10.041
2014-12-24 21:39:00	7.08086		2014-10-26 21:04:00	7.29073		2015-02-20 01:15:00	4.56076		2014-12-03 06:13:00	10.0425
2014-12-24 21:49:00	7.07934		2014-10-26 22:04:00	7.28921		2015-02-20 01:25:00	4.56233		2014-12-03 07:13:00	10.0395
2014-12-24 21:59:00	7.08086		2014-10-26 23:04:00	7.28617		2015-02-20 01:35:00	4.56233		2014-12-03 08:13:00	10.041
2014-12-24 22:09:00	7.07934		2014-10-27 00:04:00	7.28921		2015-02-20 01:45:00	4.56076		2014-12-03 09:13:00	10.041
2014-12-24 22:19:00	7.08086		2014-10-27 01:04:00	7.28921		2015-02-20 01:55:00	4.56076		2014-12-03 10:13:00	10.041
2014-12-24 22:29:00	7.08238		2014-10-27 02:04:00	7.28769		2015-02-20 02:05:00	4.55919		2014-12-03 11:13:00	10.041
2014-12-24 22:39:00	7.08238		2014-10-27 03:04:00	7.28617		2015-02-20 02:15:00	4.55919		2014-12-03 12:13:00	10.0425
2014-12-24 22:49:00	7.08086		2014-10-27 04:04:00	7.28465		2015-02-20 02:25:00	4.55919		2014-12-03 13:13:00	10.0365
2014-12-24 22:59:00	7.07781		2014-10-27 05:04:00	7.28769		2015-02-20 02:35:00	4.55919		2014-12-03 14:13:00	10.0395
2014-12-24 23:09:00	7.07781		2014-10-27 06:04:00	7.28769		2015-02-20 02:45:00	4.55919		2014-12-03 15:13:00	10.041
2014-12-24 23:19:00	7.07629		2014-10-27 07:04:00	7.28617		2015-02-20 02:55:00	4.55919		2014-12-03 16:13:00	10.0425
2014-12-24 23:29:00	7.07629		2014-10-27 08:04:00	7.28465		2015-02-20 03:05:00	4.55606		2014-12-03 17:13:00	10.041
2014-12-24 23:39:00	7.07629		2014-10-27 09:04:00	7.28769		2015-02-20 03:15:00	4.55449		2014-12-03 18:13:00	10.0395
2014-12-24 23:49:00	7.07477		2014-10-27 10:04:00	7.28769		2015-02-20 03:25:00	4.55606		2014-12-03 19:13:00	10.041
2014-12-24 23:59:00	7.07629		2014-10-27 11:04:00	7.28769		2015-02-20 03:35:00	4.55606		2014-12-03 20:13:00	10.0395
2014-12-25 00:09:00	7.07934		2014-10-27 12:04:00	7.28617		2015-02-20 03:45:00	4.55606		2014-12-03 21:13:00	10.0425
2014-12-25 00:19:00	7.0839		2014-10-27 13:04:00	7.28465		2015-02-20 03:55:00	4.55449		2014-12-03 22:13:00	10.041
2014-12-25 00:29:00	7.08238		2014-10-27 14:04:00	7.28617		2015-02-20 04:05:00	4.55762		2014-12-03 23:13:00	10.0425
2014-12-25 00:39:00	7.0839		2014-10-27 15:04:00	7.28465		2015-02-20 04:15:00	4.55606		2014-12-04 00:13:00	10.041
2014-12-25 00:49:00	7.08695		2014-10-27 16:04:00	7.28769		2015-02-20 04:25:00	4.55919		2014-12-04 01:13:00	10.0425
2014-12-25 00:59:00	7.08695		2014-10-27 17:04:00	7.28314		2015-02-20 04:35:00	4.55919		2014-12-04 02:13:00	10.0425
2014-12-25 01:09:00	7.08847		2014-10-27 18:04:00	7.28314		2015-02-20 04:45:00	4.55919		2014-12-04 03:13:00	10.041
2014-12-25 01:19:00	7.08695		2014-10-27 19:04:00	7.28769		2015-02-20 04:55:00	4.56076		2014-12-04 04:13:00	10.041
2014-12-25 01:29:00	7.08695		2014-10-27 20:04:00	7.28617		2015-02-20 05:05:00	4.56233		2014-12-04 05:13:00	10.041
2014-12-25 01:39:00	7.08695		2014-10-27 21:04:00	7.28314		2015-02-20 05:15:00	4.56389		2014-12-04 06:13:00	10.0395
2014-12-25 01:49:00	7.0839		2014-10-27 22:04:00	7.28465		2015-02-20 05:25:00	4.56546		2014-12-04 07:13:00	10.0395
2014-12-25 01:59:00	7.08543		2014-10-27 23:04:00	7.28162		2015-02-20 05:35:00	4.56546		2014-12-04 08:13:00	10.0425
2014-12-25 02:09:00	7.08695		2014-10-28 00:04:00	7.28162		2015-02-20 05:45:00	4.56546		2014-12-04 09:13:00	10.044
2014-12-25 02:19:00	7.08847		2014-10-28 01:04:00	7.28617		2015-02-20 05:55:00	4.56233		2014-12-04 10:13:00	10.0425
2014-12-25 02:29:00	7.08847		2014-10-28 02:04:00	7.28314		2015-02-20 06:05:00	4.56233		2014-12-04 11:13:00	10.041
2014-12-25 02:39:00	7.08999		2014-10-28 03:04:00	7.28465		2015-02-20 06:15:00	4.56389		2014-12-04 12:13:00	10.0395
2014-12-25 02:49:00	7.08999		2014-10-28 04:04:00	7.28162		2015-02-20 06:25:00	4.56703		2014-12-04 13:13:00	10.041
2014-12-25 02:59:00	7.08847		2014-10-28 05:04:00	7.28465		2015-02-20 06:35:00	4.56703		2014-12-04 14:13:00	10.0395
2014-12-25 03:09:00	7.08999		2014-10-28 06:04:00	7.28465		2015-02-20 06:45:00	4.57173		2014-12-04 15:13:00	10.0395
2014-12-25 03:19:00	7.09152		2014-10-28 07:04:00	7.28314		2015-02-20 06:55:00	4.57173		2014-12-04 16:13:00	10.041
2014-12-25 03:29:00	7.09304		2014-10-28 08:04:00	7.28465		2015-02-20 07:05:00	4.57173		2014-12-04 17:13:00	10.041
2014-12-25 03:39:00	7.09304		2014-10-28 09:04:00	7.28769		2015-02-20 07:15:00	4.57173		2014-12-04 18:13:00	10.044
2014-12-25 03:49:00	7.09304		2014-10-28 10:04:00	7.28162		2015-02-20 07:25:00	4.57017		2014-12-04 19:13:00	10.044
2014-12-25 03:59:00	7.09152		2014-10-28 11:04:00	7.28465		2015-02-20 07:35:00	4.5686		2014-12-04 20:13:00	10.0425
2014-12-25 04:09:00	7.09304		2014-10-28 12:04:00	7.28465		2015-02-20 07:45:00	4.5686		2014-12-04 21:13:00	10.0425
2014-12-25 04:19:00	7.09304		2014-10-28 13:04:00	7.28465		2015-02-20 07:55:00	4.57173		2014-12-04 22:13:00	10.0395
2014-12-25 04:29:00	7.09152		2014-10-28 14:04:00	7.28162		2015-02-20 08:05:00	4.5733		2014-12-04 23:13:00	10.041
2014-12-25 04:39:00	7.08999		2014-10-28 15:04:00	7.28162		2015-02-20 08:15:00	4.57017		2014-12-05 00:13:00	10.041
2014-12-25 04:49:00	7.08999		2014-10-28 16:04:00	7.28162		2015-02-20 08:25:00	4.5733		2014-12-05 01:13:00	10.044
2014-12-25 04:59:00	7.08999		2014-10-28 17:04:00	7.28162		2015-02-20 08:35:00	4.57173		2014-12-05 02:13:00	10.0395
2014-12-25 05:09:00	7.08999		2014-10-28 18:04:00	7.28162		2015-02-20 08:45:00	4.5733		2014-12-05 03:13:00	10.041
2014-12-25 05:19:00	7.08847		2014-10-28 19:04:00	7.28314		2015-02-20 08:55:00	4.5733		2014-12-05 04:13:00	10.0425
2014-12-25 05:29:00	7.0839		2014-10-28 20:04:00	7.27858		2015-02-20 09:05:00	4.57644		2014-12-05 05:13:00	10.0395
2014-12-25 05:39:00	7.07934		2014-10-28 21:04:00	7.28162		2015-02-20 09:15:00	4.578		2014-12-05 06:13:00	10.038
2014-12-25 05:49:00	7.07934		2014-10-28 22:04:00	7.28162		2015-02-20 09:25:00	4.58114		2014-12-05 07:13:00	10.041
2014-12-25 05:59:00	7.08086		2014-10-28 23:04:00	7.2801		2015-02-20 09:35:00	4.58741		2014-12-05 08:13:00	10.041
2014-12-25 06:09:00	7.08543		2014-10-29 00:04:00	7.28465		2015-02-20 09:45:00	4.59054		2014-12-05 09:13:00	10.0425
2014-12-25 06:19:00	7.08695		2014-10-29 01:04:00	7.2801		2015-02-20 09:55:00	4.59211		2014-12-05 10:13:00	10.041
2014-12-25 06:29:00	7.08695		2014-10-29 02:04:00	7.28314		2015-02-20 10:05:00	4.59368		2014-12-05 11:13:00	10.0425
2014-12-25 06:39:00	7.08847		2014-10-29 03:04:00	7.2801		2015-02-20 10:15:00	4.59681		2014-12-05 12:13:00	10.0425
2014-12-25 06:49:00	7.08847		2014-10-29 04:04:00	7.27858		2015-02-20 10:25:00	4.59838		2014-12-05 13:13:00	10.041
2014-12-25 06:59:00	7.08847		2014-10-29 05:04:00	7.28162		2015-02-20 10:35:00	4.59995		2014-12-05 14:13:00	10.0395
2014-12-25 07:09:00	7.08847		2014-10-29 06:04:00	7.28162		2015-02-20 10:45:00	4.60308		2014-12-05 15:13:00	10.0395
2014-12-25 07:19:00	7.08847		2014-10-29 07:04:00	7.28162		2015-02-20 10:55:00	4.60465		2014-12-05 16:13:00	10.038
2014-12-25 07:29:00	7.09152		2014-10-29 08:04:00	7.2801		2015-02-20 11:05:00	4.60778		2014-12-05 17:13:00	10.038
2014-12-25 07:39:00	7.09152		2014-10-29 09:04:00	7.28314		2015-02-20 11:15:00	4.60778		2014-12-05 18:13:00	10.0454
2014-12-25 07:49:00	7.09152		2014-10-29 10:04:00	7.28162		2015-02-20 11:25:00	4.60935		2014-12-05 19:13:00	10.044
2014-12-25 07:59:00	7.09152		2014-10-29 11:04:00	7.2801		2015-02-20 11:35:00	4.61091		2014-12-05 20:13:00	10.0469
2014-12-25 08:09:00	7.09152		2014-10-29 12:04:00	7.2801		2015-02-20 11:45:00	4.61405		2014-12-05 21:13:00	10.0395
2014-12-25 08:19:00	7.09304		2014-10-29 13:04:00	7.2801		2015-02-20 11:55:00	4.61561		2014-12-05 22:13:00	10.0395
2014-12-25 08:29:00	7.09304		2014-10-29 14:04:00	7.27858		2015-02-20 12:05:00	4.61718		2014-12-05 23:13:00	10.0425
2014-12-25 08:39:00	7.09304		2014-10-29 15:04:00	7.27858		2015-02-20 12:15:00	4.61718		2014-12-06 00:13:00	10.038
2014-12-25 08:49:00	7.09304		2014-10-29 16:04:00	7.2801		2015-02-20 12:25:00	4.61875		2014-12-06 01:13:00	10.0425
2014-12-25 08:59:00	7.09304		2014-10-29 17:04:00	7.2801		2015-02-20 12:35:00	4.62032		2014-12-06 02:13:00	10.041
2014-12-25 09:09:00	7.09152		2014-10-29 18:04:00	7.2801		2015-02-20 12:45:00	4.62032		2014-12-06 03:13:00	10.0454
2014-12-25 09:19:00	7.09304		2014-10-29 19:04:00	7.28162		2015-02-20 12:55:00	4.62345		2014-12-06 04:13:00	10.044
2014-12-25 09:29:00	7.09304		2014-10-29 20:04:00	7.2801		2015-02-20 13:05:00	4.62345		2014-12-06 05:13:00	10.038
2014-12-25 09:39:00	7.09304		2014-10-29 21:04:00	7.28162		2015-02-20 13:15:00	4.62815		2014-12-06 06:13:00	10.0454
2014-12-25 09:49:00	7.09304		2014-10-29 22:04:00	7.28162		2015-02-20 13:25:00	4.62815		2014-12-06 07:13:00	10.0395
2014-12-25 09:59:00	7.09152		2014-10-29 23:04:00	7.28162		2015-02-20 13:35:00	4.62971		2014-12-06 08:13:00	10.0454
2014-12-25 10:09:00	7.08999		2014-10-30 00:04:00	7.2801		2015-02-20 13:45:00	4.62971		2014-12-06 09:13:00	10.044
2014-12-25 10:19:00	7.08847		2014-10-30 01:04:00	7.27858		2015-02-20 13:55:00	4.63128		2014-12-06 10:13:00	10.0425
2014-12-25 10:29:00	7.08847		2014-10-30 02:04:00	7.2801		2015-02-20 14:05:00	4.63285		2014-12-06 11:13:00	10.038
2014-12-25 10:39:00	7.08999		2014-10-30 03:04:00	7.2801		2015-02-20 14:15:00	4.63441		2014-12-06 12:13:00	10.0454
2014-12-25 10:49:00	7.08999		2014-10-30 04:04:00	7.27858		2015-02-20 14:25:00	4.63598		2014-12-06 13:13:00	10.044
2014-12-25 10:59:00	7.09152		2014-10-30 05:04:00	7.28162		2015-02-20 14:35:00	4.63755		2014-12-06 14:13:00	10.0425
2014-12-25 11:09:00	7.09304		2014-10-30 06:04:00	7.28162		2015-02-20 14:45:00	4.63911		2014-12-06 15:13:00	10.0395
2014-12-25 11:19:00	7.09304		2014-10-30 07:04:00	7.28162		2015-02-20 14:55:00	4.64225		2014-12-06 16:13:00	10.0425
2014-12-25 11:29:00	7.09152		2014-10-30 08:04:00	7.28162		2015-02-20 15:05:00	4.64068		2014-12-06 17:13:00	10.0395
2014-12-25 11:39:00	7.08847		2014-10-30 09:04:00	7.28465		2015-02-20 15:15:00	4.64225		2014-12-06 18:13:00	10.0484
2014-12-25 11:49:00	7.09152		2014-10-30 10:04:00	7.28314		2015-02-20 15:25:00	4.64225		2014-12-06 19:13:00	10.0469
2014-12-25 11:59:00	7.09304		2014-10-30 11:04:00	7.28162		2015-02-20 15:35:00	4.64381		2014-12-06 20:13:00	10.044
2014-12-25 12:09:00	7.09304		2014-10-30 12:04:00	7.28162		2015-02-20 15:45:00	4.64538		2014-12-06 21:13:00	10.044
2014-12-25 12:19:00	7.09152		2014-10-30 13:04:00	7.28314		2015-02-20 15:55:00	4.64538		2014-12-06 22:13:00	10.0454
2014-12-25 12:29:00	7.09304		2014-10-30 14:04:00	7.28162		2015-02-20 16:05:00	4.64538		2014-12-06 23:13:00	10.044
2014-12-25 12:39:00	7.09152		2014-10-30 15:04:00	7.28162		2015-02-20 16:15:00	4.64694		2014-12-07 00:13:00	10.0469
2014-12-25 12:49:00	7.09152		2014-10-30 16:04:00	7.28314		2015-02-20 16:25:00	4.64694		2014-12-07 01:13:00	10.044
2014-12-25 12:59:00	7.09304		2014-10-30 17:04:00	7.28162		2015-02-20 16:35:00	4.64694		2014-12-07 02:13:00	10.0454
2014-12-25 13:09:00	7.09456		2014-10-30 18:04:00	7.28162		2015-02-20 16:45:00	4.64851		2014-12-07 03:13:00	10.0469
2014-12-25 13:19:00	7.09456		2014-10-30 19:04:00	7.28465		2015-02-20 16:55:00	4.64851		2014-12-07 04:13:00	10.0425
2014-12-25 13:29:00	7.09456		2014-10-30 20:04:00	7.28465		2015-02-20 17:05:00	4.64851		2014-12-07 05:13:00	10.0469
2014-12-25 13:39:00	7.09608		2014-10-30 21:04:00	7.28465		2015-02-20 17:15:00	4.64851		2014-12-07 06:13:00	10.0484
2014-12-25 13:49:00	7.09304		2014-10-30 22:04:00	7.28465		2015-02-20 17:25:00	4.64851		2014-12-07 07:13:00	10.0528
2014-12-25 13:59:00	7.08847		2014-10-30 23:04:00	7.28314		2015-02-20 17:35:00	4.64851		2014-12-07 08:13:00	10.0514
2014-12-25 14:09:00	7.08238		2014-10-31 00:04:00	7.28314		2015-02-20 17:45:00	4.64851		2014-12-07 09:13:00	10.0514
2014-12-25 14:19:00	7.07629		2014-10-31 01:04:00	7.28314		2015-02-20 17:55:00	4.65008		2014-12-07 10:13:00	10.044
2014-12-25 14:29:00	7.07477		2014-10-31 02:04:00	7.28465		2015-02-20 18:05:00	4.65008		2014-12-07 11:13:00	10.0469
2014-12-25 14:39:00	7.07629		2014-10-31 03:04:00	7.28314		2015-02-20 18:15:00	4.65164		2014-12-07 12:13:00	10.0454
2014-12-25 14:49:00	7.07629		2014-10-31 04:04:00	7.28465		2015-02-20 18:25:00	4.65164		2014-12-07 13:13:00	10.0454
2014-12-25 14:59:00	7.07629		2014-10-31 05:04:00	7.28769		2015-02-20 18:35:00	4.65164		2014-12-07 14:13:00	10.0454
2014-12-25 15:09:00	7.07477		2014-10-31 06:04:00	7.28314		2015-02-20 18:45:00	4.65164		2014-12-07 15:13:00	10.044
2014-12-25 15:19:00	7.07477		2014-10-31 07:04:00	7.2801		2015-02-20 18:55:00	4.65164		2014-12-07 16:13:00	10.0484
2014-12-25 15:29:00	7.07325		2014-10-31 08:04:00	7.28617		2015-02-20 19:05:00	4.65321		2014-12-07 17:13:00	10.0469
2014-12-25 15:39:00	7.07325		2014-10-31 09:04:00	7.28465		2015-02-20 19:15:00	4.65477		2014-12-07 18:13:00	10.0514
2014-12-25 15:49:00	7.07477		2014-10-31 10:04:00	7.28769		2015-02-20 19:25:00	4.65477		2014-12-07 19:13:00	10.0528
2014-12-25 15:59:00	7.07172		2014-10-31 11:04:00	7.28769		2015-02-20 19:35:00	4.65634		2014-12-07 20:13:00	10.0499
2014-12-25 16:09:00	7.07172		2014-10-31 12:04:00	7.28617		2015-02-20 19:45:00	4.65634		2014-12-07 21:13:00	10.0484
2014-12-25 16:19:00	7.0702		2014-10-31 13:04:00	7.28617		2015-02-20 19:55:00	4.65634		2014-12-07 22:13:00	10.0454
2014-12-25 16:29:00	7.0702		2014-10-31 14:04:00	7.28314		2015-02-20 20:05:00	4.65791		2014-12-07 23:13:00	10.0469
2014-12-25 16:39:00	7.07325		2014-10-31 15:04:00	7.28465		2015-02-20 20:15:00	4.65791		2014-12-08 00:13:00	10.0454
2014-12-25 16:49:00	7.07629		2014-10-31 16:04:00	7.28769		2015-02-20 20:25:00	4.65634		2014-12-08 01:13:00	10.0454
2014-12-25 16:59:00	7.08238		2014-10-31 17:04:00	7.28769		2015-02-20 20:35:00	4.65791		2014-12-08 02:13:00	10.0469
2014-12-25 17:09:00	7.08543		2014-10-31 18:04:00	7.28617		2015-02-20 20:45:00	4.65791		2014-12-08 03:13:00	10.0454
2014-12-25 17:19:00	7.08847					2015-02-20 20:55:00	4.65947		2014-12-08 04:13:00	10.044
2014-12-25 17:29:00	7.08999		2014-11-01 08:00:00	7.28921		2015-02-20 21:05:00	4.66104		2014-12-08 05:13:00	10.0395
2014-12-25 17:39:00	7.08999		2014-11-01 09:00:00	7.29073		2015-02-20 21:15:00	4.65947		2014-12-08 06:13:00	10.044
2014-12-25 17:49:00	7.09152		2014-11-01 10:00:00	7.29225		2015-02-20 21:25:00	4.65947		2014-12-08 07:13:00	10.044
2014-12-25 17:59:00	7.09152		2014-11-01 11:00:00	7.29073		2015-02-20 21:35:00	4.66104		2014-12-08 08:13:00	10.0499
2014-12-25 18:09:00	7.09304		2014-11-01 12:00:00	7.29073		2015-02-20 21:45:00	4.65947		2014-12-08 09:13:00	10.044
2014-12-25 18:19:00	7.09456		2014-11-01 13:00:00	7.28921		2015-02-20 21:55:00	4.66104		2014-12-08 10:13:00	10.0454
2014-12-25 18:29:00	7.09456		2014-11-01 14:00:00	7.28769		2015-02-20 22:05:00	4.65947		2014-12-08 11:13:00	10.0484
2014-12-25 18:39:00	7.09304		2014-11-01 15:00:00	7.28921		2015-02-20 22:15:00	4.65791		2014-12-08 12:13:00	10.0499
2014-12-25 18:49:00	7.09304		2014-11-01 16:00:00	7.28921		2015-02-20 22:25:00	4.65791		2014-12-08 13:13:00	10.044
2014-12-25 18:59:00	7.09456		2014-11-01 17:00:00	7.28769		2015-02-20 22:35:00	4.65791		2014-12-08 14:13:00	10.0454
2014-12-25 19:09:00	7.09304		2014-11-01 18:00:00	7.28769		2015-02-20 22:45:00	4.65947		2014-12-08 15:13:00	10.041
2014-12-25 19:19:00	7.09304		2014-11-01 19:00:00	7.28921		2015-02-20 22:55:00	4.66104		2014-12-08 16:13:00	10.0454
2014-12-25 19:29:00	7.09304		2014-11-01 20:00:00	7.28769		2015-02-20 23:05:00	4.65947		2014-12-08 17:13:00	10.0425
2014-12-25 19:39:00	7.09304		2014-11-01 21:00:00	7.28921		2015-02-20 23:15:00	4.65947		2014-12-08 18:13:00	10.0499
2014-12-25 19:49:00	7.09304		2014-11-01 22:00:00	7.29073		2015-02-20 23:25:00	4.66104		2014-12-08 19:13:00	10.0543
2014-12-25 19:59:00	7.09456		2014-11-01 23:00:00	7.29225		2015-02-20 23:35:00	4.65947		2014-12-08 20:13:00	10.0469
2014-12-25 20:09:00	7.09456		2014-11-02	7.28921		2015-02-20 23:45:00	4.66104		2014-12-08 21:13:00	10.044
2014-12-25 20:19:00	7.09608		2014-11-02 01:00:00	7.28769		2015-02-20 23:55:00	4.6626		2014-12-08 22:13:00	10.0484
2014-12-25 20:29:00	7.09456		2014-11-02 02:00:00	7.28921		2015-02-21 00:05:00	4.66417		2014-12-08 23:13:00	10.0425
2014-12-25 20:39:00	7.09456		2014-11-02 03:00:00	7.28769		2015-02-21 00:15:00	4.66417		2014-12-09 00:13:00	10.0395
2014-12-25 20:49:00	7.09456		2014-11-02 04:00:00	7.28617		2015-02-21 00:25:00	4.66574		2014-12-09 01:13:00	10.041
2014-12-25 20:59:00	7.09456		2014-11-02 05:00:00	7.28921		2015-02-21 00:35:00	4.6673		2014-12-09 02:13:00	10.0454
2014-12-25 21:09:00	7.09456		2014-11-02 06:00:00	7.28921		2015-02-21 00:45:00	4.66574		2014-12-09 03:13:00	10.0469
2014-12-25 21:19:00	7.09456		2014-11-02 07:00:00	7.28921		2015-02-21 00:55:00	4.66417		2014-12-09 04:13:00	10.0484
2014-12-25 21:29:00	7.09456		2014-11-02 08:00:00	7.28617		2015-02-21 01:05:00	4.66574		2014-12-09 05:13:00	10.0469
2014-12-25 21:39:00	7.09608		2014-11-02 09:00:00	7.28769		2015-02-21 01:15:00	4.6626		2014-12-09 06:13:00	10.044
2014-12-25 21:49:00	7.09608		2014-11-02 10:00:00	7.29225		2015-02-21 01:25:00	4.66417		2014-12-09 07:13:00	10.0469
2014-12-25 21:59:00	7.09608		2014-11-02 11:00:00	7.28921		2015-02-21 01:35:00	4.6673		2014-12-09 08:13:00	10.0425
2014-12-25 22:09:00	7.09608		2014-11-02 12:00:00	7.29073		2015-02-21 01:45:00	4.66887		2014-12-09 09:13:00	10.0499
2014-12-25 22:19:00	7.09456		2014-11-02 13:00:00	7.28769		2015-02-21 01:55:00	4.67043		2014-12-09 10:13:00	10.0469
2014-12-25 22:29:00	7.09456		2014-11-02 14:00:00	7.28921		2015-02-21 02:05:00	4.6673		2014-12-09 11:13:00	10.0469
2014-12-25 22:39:00	7.09456		2014-11-02 15:00:00	7.28921		2015-02-21 02:15:00	4.6673		2014-12-09 12:13:00	10.0484
2014-12-25 22:49:00	7.09456		2014-11-02 16:00:00	7.28921		2015-02-21 02:25:00	4.66887		2014-12-09 13:13:00	10.0499
2014-12-25 22:59:00	7.09304		2014-11-02 17:00:00	7.28769		2015-02-21 02:35:00	4.67043		2014-12-09 14:13:00	10.0484
2014-12-25 23:09:00	7.09304		2014-11-02 18:00:00	7.28921		2015-02-21 02:45:00	4.672		2014-12-09 15:13:00	10.0499
2014-12-25 23:19:00	7.09152		2014-11-02 19:00:00	7.29225		2015-02-21 02:55:00	4.67513		2014-12-09 16:13:00	10.0469
2014-12-25 23:29:00	7.09304		2014-11-02 20:00:00	7.29225		2015-02-21 03:05:00	4.67669		2014-12-09 17:13:00	10.0514
2014-12-25 23:39:00	7.09304		2014-11-02 21:00:00	7.29377		2015-02-21 03:15:00	4.67669		2014-12-09 18:13:00	10.0484
2014-12-25 23:49:00	7.09152		2014-11-02 22:00:00	7.29073		2015-02-21 03:25:00	4.67669		2014-12-09 19:13:00	10.0543
2014-12-25 23:59:00	7.09152		2014-11-02 23:00:00	7.29073		2015-02-21 03:35:00	4.67513		2014-12-09 20:13:00	10.0499
2014-12-26 00:09:00	7.08999		2014-11-03	7.29073		2015-02-21 03:45:00	4.67669		2014-12-09 21:13:00	10.0454
2014-12-26 00:19:00	7.08999		2014-11-03 01:00:00	7.28921		2015-02-21 03:55:00	4.67669		2014-12-09 22:13:00	10.0484
2014-12-26 00:29:00	7.08999		2014-11-03 02:00:00	7.29225		2015-02-21 04:05:00	4.67513		2014-12-09 23:13:00	10.0499
2014-12-26 00:39:00	7.08999		2014-11-03 03:00:00	7.29073		2015-02-21 04:15:00	4.67669		2014-12-10 00:13:00	10.0528
2014-12-26 00:49:00	7.08999		2014-11-03 04:00:00	7.28921		2015-02-21 04:25:00	4.67826		2014-12-10 01:13:00	10.0484
2014-12-26 00:59:00	7.08847		2014-11-03 05:00:00	7.29073		2015-02-21 04:35:00	4.67983		2014-12-10 02:13:00	10.0469
2014-12-26 01:09:00	7.08695		2014-11-03 06:00:00	7.28921		2015-02-21 04:45:00	4.67983		2014-12-10 03:13:00	10.0484
2014-12-26 01:19:00	7.08695		2014-11-03 07:00:00	7.29225		2015-02-21 04:55:00	4.67826		2014-12-10 04:13:00	10.0499
2014-12-26 01:29:00	7.08695		2014-11-03 08:00:00	7.29225		2015-02-21 05:05:00	4.67983		2014-12-10 05:13:00	10.0469
2014-12-26 01:39:00	7.08695		2014-11-03 09:00:00	7.29225		2015-02-21 05:15:00	4.68139		2014-12-10 06:13:00	10.0514
2014-12-26 01:49:00	7.08695		2014-11-03 10:00:00	7.29529		2015-02-21 05:25:00	4.67983		2014-12-10 07:13:00	10.0484
2014-12-26 01:59:00	7.08543		2014-11-03 11:00:00	7.29377		2015-02-21 05:35:00	4.68139		2014-12-10 08:13:00	10.0454
2014-12-26 02:09:00	7.0839		2014-11-03 12:00:00	7.29225		2015-02-21 05:45:00	4.68139		2014-12-10 09:13:00	10.0499
2014-12-26 02:19:00	7.08543		2014-11-03 13:00:00	7.29225		2015-02-21 05:55:00	4.68139		2014-12-10 10:13:00	10.0528
2014-12-26 02:29:00	7.08543		2014-11-03 14:00:00	7.29377		2015-02-21 06:05:00	4.68296		2014-12-10 11:13:00	10.0528
2014-12-26 02:39:00	7.08695		2014-11-03 15:00:00	7.29073		2015-02-21 06:15:00	4.68139		2014-12-10 12:13:00	10.0469
2014-12-26 02:49:00	7.08847		2014-11-03 16:00:00	7.29225		2015-02-21 06:25:00	4.67826		2014-12-10 13:13:00	10.044
2014-12-26 02:59:00	7.08847		2014-11-03 17:00:00	7.29681		2015-02-21 06:35:00	4.67826		2014-12-10 14:13:00	10.0484
2014-12-26 03:09:00	7.08847		2014-11-03 18:00:00	7.29225		2015-02-21 06:45:00	4.67826		2014-12-10 15:13:00	10.0469
2014-12-26 03:19:00	7.08847		2014-11-03 19:00:00	7.29073		2015-02-21 06:55:00	4.67983		2014-12-10 16:13:00	10.0514
2014-12-26 03:29:00	7.08999		2014-11-03 20:00:00	7.29529		2015-02-21 07:05:00	4.67669		2014-12-10 17:13:00	10.0499
2014-12-26 03:39:00	7.08999		2014-11-03 21:00:00	7.29073		2015-02-21 07:15:00	4.67669		2014-12-10 18:13:00	10.0484
2014-12-26 03:49:00	7.08999		2014-11-03 22:00:00	7.29225		2015-02-21 07:25:00	4.67513		2014-12-10 19:13:00	10.0499
2014-12-26 03:59:00	7.08847		2014-11-03 23:00:00	7.29073		2015-02-21 07:35:00	4.67513		2014-12-10 20:13:00	10.0514
2014-12-26 04:09:00	7.08847		2014-11-04	7.28921		2015-02-21 07:45:00	4.67513		2014-12-10 21:13:00	10.0499
2014-12-26 04:19:00	7.08847		2014-11-04 01:00:00	7.29681		2015-02-21 07:55:00	4.67669		2014-12-10 22:13:00	10.0484
2014-12-26 04:29:00	7.08847		2014-11-04 02:00:00	7.29073		2015-02-21 08:05:00	4.67669		2014-12-10 23:13:00	10.0499
2014-12-26 04:39:00	7.08847		2014-11-04 03:00:00	7.29377		2015-02-21 08:15:00	4.67669		2014-12-11 00:13:00	10.0499
2014-12-26 04:49:00	7.08847		2014-11-04 04:00:00	7.29225		2015-02-21 08:25:00	4.67669		2014-12-11 01:13:00	10.0469
2014-12-26 04:59:00	7.08847		2014-11-04 05:00:00	7.29833		2015-02-21 08:35:00	4.67669		2014-12-11 02:13:00	10.0484
2014-12-26 05:09:00	7.08999		2014-11-04 06:00:00	7.29529		2015-02-21 08:45:00	4.67669		2014-12-11 03:13:00	10.0484
2014-12-26 05:19:00	7.08847		2014-11-04 07:00:00	7.29529		2015-02-21 08:55:00	4.67983		2014-12-11 04:13:00	10.0469
2014-12-26 05:29:00	7.08847		2014-11-04 08:00:00	7.29225		2015-02-21 09:05:00	4.68452		2014-12-11 05:13:00	10.0484
2014-12-26 05:39:00	7.08999		2014-11-04 09:00:00	7.29377		2015-02-21 09:15:00	4.68452		2014-12-11 06:13:00	10.0454
2014-12-26 05:49:00	7.08999		2014-11-04 10:00:00	7.29529		2015-02-21 09:25:00	4.68609		2014-12-11 07:13:00	10.0484
2014-12-26 05:59:00	7.08847		2014-11-04 11:00:00	7.29377		2015-02-21 09:35:00	4.68765		2014-12-11 08:13:00	10.0484
2014-12-26 06:09:00	7.08847		2014-11-04 12:00:00	7.29833		2015-02-21 09:45:00	4.68922		2014-12-11 09:13:00	10.0499
2014-12-26 06:19:00	7.08847		2014-11-04 13:00:00	7.29529		2015-02-21 09:55:00	4.68922		2014-12-11 10:13:00	10.0469
2014-12-26 06:29:00	7.08847		2014-11-04 14:00:00	7.29377		2015-02-21 10:05:00	4.69078		2014-12-11 11:13:00	10.0454
2014-12-26 06:39:00	7.08847		2014-11-04 15:00:00	7.29529		2015-02-21 10:15:00	4.69391		2014-12-11 12:13:00	10.0484
2014-12-26 06:49:00	7.08847		2014-11-04 16:00:00	7.29377		2015-02-21 10:25:00	4.69548		2014-12-11 13:13:00	10.0484
2014-12-26 06:59:00	7.08847		2014-11-04 17:00:00	7.29225		2015-02-21 10:35:00	4.69704		2014-12-11 14:13:00	10.0484
2014-12-26 07:09:00	7.08847		2014-11-04 18:00:00	7.29377		2015-02-21 10:45:00	4.69861		2014-12-11 15:13:00	10.0469
2014-12-26 07:19:00	7.08847		2014-11-04 19:00:00	7.29985		2015-02-21 10:55:00	4.70017		2014-12-11 16:13:00	10.0499
2014-12-26 07:29:00	7.08999		2014-11-04 20:00:00	7.29225		2015-02-21 11:05:00	4.70174		2014-12-11 17:13:00	10.0454
2014-12-26 07:39:00	7.09152		2014-11-04 21:00:00	7.29377		2015-02-21 11:15:00	4.70487		2014-12-11 18:13:00	10.0514
2014-12-26 07:49:00	7.09152		2014-11-04 22:00:00	7.29377		2015-02-21 11:25:00	4.70487		2014-12-11 19:13:00	10.0499
2014-12-26 07:59:00	7.09152		2014-11-04 23:00:00	7.29681		2015-02-21 11:35:00	4.708		2014-12-11 20:13:00	10.0484
2014-12-26 08:09:00	7.08999		2014-11-05	7.29225		2015-02-21 11:45:00	4.70956		2014-12-11 21:13:00	10.0499
2014-12-26 08:19:00	7.09152		2014-11-05 01:00:00	7.29681		2015-02-21 11:55:00	4.71113		2014-12-11 22:13:00	10.0484
2014-12-26 08:29:00	7.09152		2014-11-05 02:00:00	7.29529		2015-02-21 12:05:00	4.71113		2014-12-11 23:13:00	10.0499
2014-12-26 08:39:00	7.09152		2014-11-05 03:00:00	7.29681		2015-02-21 12:15:00	4.71426		2014-12-12 00:13:00	10.0484
2014-12-26 08:49:00	7.08999		2014-11-05 04:00:00	7.29529		2015-02-21 12:25:00	4.71582		2014-12-12 01:13:00	10.0484
2014-12-26 08:59:00	7.09152		2014-11-05 05:00:00	7.29377		2015-02-21 12:35:00	4.71582		2014-12-12 02:13:00	10.0499
2014-12-26 09:09:00	7.09152		2014-11-05 06:00:00	7.29529		2015-02-21 12:45:00	4.71582		2014-12-12 03:13:00	10.0469
2014-12-26 09:19:00	7.08999		2014-11-05 07:00:00	7.29681		2015-02-21 12:55:00	4.71895		2014-12-12 04:13:00	10.0484
2014-12-26 09:29:00	7.09152		2014-11-05 08:00:00	7.29681		2015-02-21 13:05:00	4.71895		2014-12-12 05:13:00	10.0499
2014-12-26 09:39:00	7.08999		2014-11-05 09:00:00	7.29985		2015-02-21 13:15:00	4.72208		2014-12-12 06:13:00	10.0499
2014-12-26 09:49:00	7.08999		2014-11-05 10:00:00	7.3044		2015-02-21 13:25:00	4.72678		2014-12-12 07:13:00	10.0514
2014-12-26 09:59:00	7.08999		2014-11-05 11:00:00	7.29985		2015-02-21 13:35:00	4.72678		2014-12-12 08:13:00	10.0499
2014-12-26 10:09:00	7.08999		2014-11-05 12:00:00	7.29985		2015-02-21 13:45:00	4.72521		2014-12-12 09:13:00	10.0514
2014-12-26 10:19:00	7.08999		2014-11-05 13:00:00	7.29681		2015-02-21 13:55:00	4.72678		2014-12-12 10:13:00	10.0528
2014-12-26 10:29:00	7.08999		2014-11-05 14:00:00	7.29681		2015-02-21 14:05:00	4.72991		2014-12-12 11:13:00
2014-12-26 10:39:00	7.08999		2014-11-05 15:00:00	7.29681		2015-02-21 14:15:00	4.73147		2014-12-12 12:13:00
2014-12-26 10:49:00	7.08847		2014-11-05 16:00:00	7.29833		2015-02-21 14:25:00	4.73147		2014-12-12 13:13:00
2014-12-26 10:59:00	7.08999		2014-11-05 17:00:00	7.29377		2015-02-21 14:35:00	4.73147		2014-12-12 14:13:00
2014-12-26 11:09:00	7.09152		2014-11-05 18:00:00	7.29681		2015-02-21 14:45:00	4.73147		2014-12-12 15:13:00	10.0721
2014-12-26 11:19:00	7.09304		2014-11-05 19:00:00	7.29985		2015-02-21 14:55:00	4.7346		2014-12-12 16:13:00	10.0692
2014-12-26 11:29:00	7.09304		2014-11-05 20:00:00	7.29833		2015-02-21 15:05:00	4.7346		2014-12-12 17:13:00	10.0647
2014-12-26 11:39:00	7.09304		2014-11-05 21:00:00	7.29681		2015-02-21 15:15:00	4.73303		2014-12-12 18:13:00	10.0647
2014-12-26 11:49:00	7.09152		2014-11-05 22:00:00	7.30137		2015-02-21 15:25:00	4.7346		2014-12-12 19:13:00	10.0602
2014-12-26 11:59:00	7.09152		2014-11-05 23:00:00	7.29985		2015-02-21 15:35:00	4.73773		2014-12-12 20:13:00	10.0647
2014-12-26 12:09:00	7.09152		2014-11-06	7.29833		2015-02-21 15:45:00	4.74086		2014-12-12 21:13:00	10.0677
2014-12-26 12:19:00	7.08999		2014-11-06 01:00:00	7.29985		2015-02-21 15:55:00	4.74086		2014-12-12 22:13:00	10.0632
2014-12-26 12:29:00	7.08999		2014-11-06 02:00:00	7.29985		2015-02-21 16:05:00	4.74086		2014-12-12 23:13:00	10.0617
2014-12-26 12:39:00	7.08847		2014-11-06 03:00:00	7.29985		2015-02-21 16:15:00	4.74086		2014-12-13 00:13:00	10.0573
2014-12-26 12:49:00	7.08847		2014-11-06 04:00:00	7.29985		2015-02-21 16:25:00	4.74086		2014-12-13 01:13:00	10.0558
2014-12-26 12:59:00	7.08847		2014-11-06 05:00:00	7.29681		2015-02-21 16:35:00	4.74086		2014-12-13 02:13:00	10.0588
2014-12-26 13:09:00	7.08847		2014-11-06 06:00:00	7.29833		2015-02-21 16:45:00	4.74086		2014-12-13 03:13:00	10.0588
2014-12-26 13:19:00	7.08847		2014-11-06 07:00:00	7.30137		2015-02-21 16:55:00	4.74086		2014-12-13 04:13:00	10.0558
2014-12-26 13:29:00	7.08847		2014-11-06 08:00:00	7.29833		2015-02-21 17:05:00	4.74242		2014-12-13 05:13:00	10.0528
2014-12-26 13:39:00	7.08847		2014-11-06 09:00:00	7.30137		2015-02-21 17:15:00	4.74242		2014-12-13 06:13:00	10.0573
2014-12-26 13:49:00	7.08999		2014-11-06 10:00:00	7.30288		2015-02-21 17:25:00	4.74242		2014-12-13 07:13:00	10.0588
2014-12-26 13:59:00	7.08847		2014-11-06 11:00:00	7.29985		2015-02-21 17:35:00	4.74242		2014-12-13 08:13:00	10.0528
2014-12-26 14:09:00	7.08847		2014-11-06 12:00:00	7.30137		2015-02-21 17:45:00	4.74398		2014-12-13 09:13:00	10.0543
2014-12-26 14:19:00	7.08999		2014-11-06 13:00:00	7.3044		2015-02-21 17:55:00	4.74398		2014-12-13 10:13:00	10.0543
2014-12-26 14:29:00	7.08999		2014-11-06 14:00:00	7.29833		2015-02-21 18:05:00	4.74398		2014-12-13 11:13:00	10.0528
2014-12-26 14:39:00	7.08999		2014-11-06 15:00:00	7.29985		2015-02-21 18:15:00	4.74398		2014-12-13 12:13:00	10.0543
2014-12-26 14:49:00	7.09152		2014-11-06 16:00:00	7.29833		2015-02-21 18:25:00	4.74398		2014-12-13 13:13:00	10.0514
2014-12-26 14:59:00	7.09152		2014-11-06 17:00:00	7.29985		2015-02-21 18:35:00	4.74398		2014-12-13 14:13:00	10.0469
2014-12-26 15:09:00	7.09304		2014-11-06 18:00:00	7.30288		2015-02-21 18:45:00	4.74555		2014-12-13 15:13:00	10.0528
2014-12-26 15:19:00	7.09152		2014-11-06 19:00:00	7.30288		2015-02-21 18:55:00	4.74398		2014-12-13 16:13:00	10.0514
2014-12-26 15:29:00	7.09152		2014-11-06 20:00:00	7.30288		2015-02-21 19:05:00	4.74398		2014-12-13 17:13:00	10.0484
2014-12-26 15:39:00	7.09152		2014-11-06 21:00:00	7.29985		2015-02-21 19:15:00	4.74398		2014-12-13 18:13:00	10.0543
2014-12-26 15:49:00	7.09304		2014-11-06 22:00:00	7.29681		2015-02-21 19:25:00	4.74398		2014-12-13 19:13:00	10.0528
2014-12-26 15:59:00	7.09304		2014-11-06 23:00:00	7.30137		2015-02-21 19:35:00	4.74242		2014-12-13 20:13:00	10.0528
2014-12-26 16:09:00	7.09456		2014-11-07	7.30592		2015-02-21 19:45:00	4.74086		2014-12-13 21:13:00	10.0573
2014-12-26 16:19:00	7.09304		2014-11-07 01:00:00	7.30744		2015-02-21 19:55:00	4.74086		2014-12-13 22:13:00	10.0528
2014-12-26 16:29:00	7.09304		2014-11-07 02:00:00	7.3044		2015-02-21 20:05:00	4.74086		2014-12-13 23:13:00	10.0499
2014-12-26 16:39:00	7.09304		2014-11-07 03:00:00	7.29681		2015-02-21 20:15:00	4.74086		2014-12-14 00:13:00	10.0484
2014-12-26 16:49:00	7.09304		2014-11-07 04:00:00	7.3044		2015-02-21 20:25:00	4.73929		2014-12-14 01:13:00	10.0499
2014-12-26 16:59:00	7.09304		2014-11-07 05:00:00	7.29529		2015-02-21 20:35:00	4.74086		2014-12-14 02:13:00	10.0499
2014-12-26 17:09:00	7.09304		2014-11-07 06:00:00	7.29529		2015-02-21 20:45:00	4.74242		2014-12-14 03:13:00	10.0499
2014-12-26 17:19:00	7.09304		2014-11-07 07:00:00	7.29681		2015-02-21 20:55:00	4.74555		2014-12-14 04:13:00	10.0514
2014-12-26 17:29:00	7.09304		2014-11-07 08:00:00	7.29833		2015-02-21 21:05:00	4.74555		2014-12-14 05:13:00	10.0499
2014-12-26 17:39:00	7.09304		2014-11-07 09:00:00	7.29833		2015-02-21 21:15:00	4.74711		2014-12-14 06:13:00	10.0499
2014-12-26 17:49:00	7.09304		2014-11-07 10:00:00	7.30288		2015-02-21 21:25:00	4.74868		2014-12-14 07:13:00	10.0499
2014-12-26 17:59:00	7.09304		2014-11-07 11:00:00	7.29833		2015-02-21 21:35:00	4.74868		2014-12-14 08:13:00	10.0499
2014-12-26 18:09:00	7.09304		2014-11-07 12:00:00	7.29833		2015-02-21 21:45:00	4.74868		2014-12-14 09:13:00	10.0528
2014-12-26 18:19:00	7.09152		2014-11-07 13:00:00	7.29529		2015-02-21 21:55:00	4.74868		2014-12-14 10:13:00	10.0499
2014-12-26 18:29:00	7.09304		2014-11-07 14:00:00	7.28769		2015-02-21 22:05:00	4.75024		2014-12-14 11:13:00	10.0499
2014-12-26 18:39:00	7.09152		2014-11-07 15:00:00	7.29377		2015-02-21 22:15:00	4.74711		2014-12-14 12:13:00	10.0484
2014-12-26 18:49:00	7.09152		2014-11-07 16:00:00	7.29681		2015-02-21 22:25:00	4.74711		2014-12-14 13:13:00	10.0469
2014-12-26 18:59:00	7.09152		2014-11-07 17:00:00	7.29073		2015-02-21 22:35:00	4.74711		2014-12-14 14:13:00	10.0499
2014-12-26 19:09:00	7.08999		2014-11-07 18:00:00	7.29985		2015-02-21 22:45:00	4.74868		2014-12-14 15:13:00	10.0469
2014-12-26 19:19:00	7.09152		2014-11-07 19:00:00	7.29681		2015-02-21 22:55:00	4.74868		2014-12-14 16:13:00	10.0514
2014-12-26 19:29:00	7.08999		2014-11-07 20:00:00	7.29377		2015-02-21 23:05:00	4.74868		2014-12-14 17:13:00	10.0514
2014-12-26 19:39:00	7.08999		2014-11-07 21:00:00	7.29833		2015-02-21 23:15:00	4.74868		2014-12-14 18:13:00	10.0514
2014-12-26 19:49:00	7.08999		2014-11-07 22:00:00	7.29833		2015-02-21 23:25:00	4.75181		2014-12-14 19:13:00	10.0499
2014-12-26 19:59:00	7.08999		2014-11-07 23:00:00	7.29529		2015-02-21 23:35:00	4.75181		2014-12-14 20:13:00	10.0469
2014-12-26 20:09:00	7.08999		2014-11-08	7.29985		2015-02-21 23:45:00	4.75024		2014-12-14 21:13:00	10.0543
2014-12-26 20:19:00	7.08999		2014-11-08 01:00:00	7.29529		2015-02-21 23:55:00	4.74868		2014-12-14 22:13:00	10.0499
2014-12-26 20:29:00	7.08999		2014-11-08 02:00:00	7.29225		2015-02-22 00:05:00	4.75181		2014-12-14 23:13:00	10.0528
2014-12-26 20:39:00	7.08999		2014-11-08 03:00:00	7.29225		2015-02-22 00:15:00	4.75337		2014-12-15 00:13:00	10.0514
2014-12-26 20:49:00	7.08999		2014-11-08 04:00:00	7.29225		2015-02-22 00:25:00	4.75337		2014-12-15 01:13:00	10.0528
2014-12-26 20:59:00	7.08999		2014-11-08 05:00:00	7.29377		2015-02-22 00:35:00	4.75337		2014-12-15 02:13:00	10.0484
2014-12-26 21:09:00	7.08999		2014-11-08 06:00:00	7.29681		2015-02-22 00:45:00	4.75181		2014-12-15 03:13:00	10.0484
2014-12-26 21:19:00	7.08999		2014-11-08 07:00:00	7.29377		2015-02-22 00:55:00	4.75181		2014-12-15 04:13:00	10.0484
2014-12-26 21:29:00	7.08847		2014-11-08 08:00:00	7.29377		2015-02-22 01:05:00	4.75181		2014-12-15 05:13:00	10.0469
2014-12-26 21:39:00	7.08847		2014-11-08 09:00:00	7.29377		2015-02-22 01:15:00	4.75181		2014-12-15 06:13:00	10.0469
2014-12-26 21:49:00	7.08847		2014-11-08 10:00:00	7.29529		2015-02-22 01:25:00	4.75337		2014-12-15 07:13:00	10.0469
2014-12-26 21:59:00	7.08847		2014-11-08 11:00:00	7.29529		2015-02-22 01:35:00	4.74711		2014-12-15 08:13:00	10.0514
2014-12-26 22:09:00	7.08847		2014-11-08 12:00:00	7.29377		2015-02-22 01:45:00	4.75024		2014-12-15 09:13:00	10.044
2014-12-26 22:19:00	7.08999		2014-11-08 13:00:00	7.29529		2015-02-22 01:55:00	4.75024		2014-12-15 10:13:00	10.0499
2014-12-26 22:29:00	7.08847		2014-11-08 14:00:00	7.29377		2015-02-22 02:05:00	4.75337		2014-12-15 11:13:00	10.0514
2014-12-26 22:39:00	7.08847		2014-11-08 15:00:00	7.29377		2015-02-22 02:15:00	4.75493		2014-12-15 12:13:00	10.0469
2014-12-26 22:49:00	7.08847		2014-11-08 16:00:00	7.29529		2015-02-22 02:25:00	4.75337		2014-12-15 13:13:00	10.0514
2014-12-26 22:59:00	7.08847		2014-11-08 17:00:00	7.29529		2015-02-22 02:35:00	4.75181		2014-12-15 14:13:00	10.044
2014-12-26 23:09:00	7.08847		2014-11-08 18:00:00	7.29529		2015-02-22 02:45:00	4.75181		2014-12-15 15:13:00	10.0499
2014-12-26 23:19:00	7.08847		2014-11-08 19:00:00	7.29529		2015-02-22 02:55:00	4.75181		2014-12-15 16:13:00	10.0499
2014-12-26 23:29:00	7.08847		2014-11-08 20:00:00	7.29377		2015-02-22 03:05:00	4.75181		2014-12-15 17:13:00	10.0528
2014-12-26 23:39:00	7.08847		2014-11-08 21:00:00	7.29681		2015-02-22 03:15:00	4.75337		2014-12-15 18:13:00	10.0528
2014-12-26 23:49:00	7.08847		2014-11-08 22:00:00	7.29681		2015-02-22 03:25:00	4.7565		2014-12-15 19:13:00	10.0543
2014-12-26 23:59:00	7.08847		2014-11-08 23:00:00	7.29681		2015-02-22 03:35:00	4.75806		2014-12-15 20:13:00	10.0484
2014-12-27 00:09:00	7.08847		2014-11-09	7.29681		2015-02-22 03:45:00	4.76119		2014-12-15 21:13:00	10.0484
2014-12-27 00:19:00	7.08847		2014-11-09 01:00:00	7.29833		2015-02-22 03:55:00	4.76119		2014-12-15 22:13:00	10.0528
2014-12-27 00:29:00	7.08999		2014-11-09 02:00:00	7.29985		2015-02-22 04:05:00	4.76119		2014-12-15 23:13:00	10.0514
2014-12-27 00:39:00	7.08999		2014-11-09 03:00:00	7.29833		2015-02-22 04:15:00	4.76119		2014-12-16 00:13:00	10.0514
2014-12-27 00:49:00	7.08847		2014-11-09 04:00:00	7.29833		2015-02-22 04:25:00	4.76275		2014-12-16 01:13:00	10.044
2014-12-27 00:59:00	7.08999		2014-11-09 05:00:00	7.29681		2015-02-22 04:35:00	4.76432		2014-12-16 02:13:00	10.044
2014-12-27 01:09:00	7.08847		2014-11-09 06:00:00	7.30137		2015-02-22 04:45:00	4.76588		2014-12-16 03:13:00	10.041
2014-12-27 01:19:00	7.08847		2014-11-09 07:00:00	7.29985		2015-02-22 04:55:00	4.76744		2014-12-16 04:13:00	10.041
2014-12-27 01:29:00	7.08847		2014-11-09 08:00:00	7.29833		2015-02-22 05:05:00	4.76901		2014-12-16 05:13:00	10.0425
2014-12-27 01:39:00	7.08847		2014-11-09 09:00:00	7.30137		2015-02-22 05:15:00	4.77057		2014-12-16 06:13:00	10.0454
2014-12-27 01:49:00	7.08847		2014-11-09 10:00:00	7.29985		2015-02-22 05:25:00	4.76901		2014-12-16 07:13:00	10.0469
2014-12-27 01:59:00	7.08695		2014-11-09 11:00:00	7.29681		2015-02-22 05:35:00	4.76901		2014-12-16 08:13:00	10.044
2014-12-27 02:09:00	7.08695		2014-11-09 12:00:00	7.30288		2015-02-22 05:45:00	4.76901		2014-12-16 09:13:00	10.0454
2014-12-27 02:19:00	7.08695		2014-11-09 13:00:00	7.30137		2015-02-22 05:55:00	4.77057		2014-12-16 10:13:00	10.0484
2014-12-27 02:29:00	7.08695		2014-11-09 14:00:00	7.29681		2015-02-22 06:05:00	4.77057		2014-12-16 11:13:00	10.0454
2014-12-27 02:39:00	7.08695		2014-11-09 15:00:00	7.29985		2015-02-22 06:15:00	4.76901		2014-12-16 12:13:00	10.044
2014-12-27 02:49:00	7.08695		2014-11-09 16:00:00	7.30137		2015-02-22 06:25:00	4.77057		2014-12-16 13:13:00	10.0484
2014-12-27 02:59:00	7.08695		2014-11-09 17:00:00	7.30137		2015-02-22 06:35:00	4.77057		2014-12-16 14:13:00	10.041
2014-12-27 03:09:00	7.08695		2014-11-09 18:00:00	7.30137		2015-02-22 06:45:00	4.77214		2014-12-16 15:13:00	10.0425
2014-12-27 03:19:00	7.08695		2014-11-09 19:00:00	7.30288		2015-02-22 06:55:00	4.7737		2014-12-16 16:13:00	10.0469
2014-12-27 03:29:00	7.08695		2014-11-09 20:00:00	7.30137		2015-02-22 07:05:00	4.77526		2014-12-16 17:13:00	10.0484
[truncated: 116,944 more rows]

## Sheet: fig07.
Isverna time	Isverna daily PP (mm)			POM 2 Time	POM 2 drips/min
2014-08-16 23:53:00	0			2014-08-17 16:03:00	31.2
2014-08-17 23:53:00	0			2014-08-17 16:08:00	31.4
2014-08-18 23:53:00	0			2014-08-17 16:13:00	31.4
2014-08-19 23:53:00	0			2014-08-17 16:18:00	31.4
2014-08-20 23:53:00	0			2014-08-17 16:23:00	31.4
2014-08-21 23:53:00	0			2014-08-17 16:28:00	31.4
2014-08-22 23:53:00	0			2014-08-17 16:33:00	31.4
2014-08-23 23:53:00	0.2			2014-08-17 16:38:00	31.4
2014-08-24 23:53:00	31.22			2014-08-17 16:43:00	31.4
2014-08-25 23:53:00	0			2014-08-17 16:48:00	31.4
2014-08-26 23:53:00	0			2014-08-17 16:53:00	32
2014-08-27 23:53:00	1.88			2014-08-17 16:58:00	32.8
2014-08-28 23:53:00	0			2014-08-17 17:03:00	33.2
2014-08-29 23:53:00	0			2014-08-17 17:08:00	33.4
2014-08-30 23:53:00	0			2014-08-17 17:13:00	33.2
2014-08-31 23:53:00	0			2014-08-17 17:18:00	33.2
2014-09-01 23:53:00	0			2014-08-17 17:23:00	32.8
2014-09-02 23:53:00	0			2014-08-17 17:28:00	32.8
2014-09-03 23:53:00	18.71			2014-08-17 17:33:00	32.8
2014-09-04 23:53:00	18.78			2014-08-17 17:38:00	32.8
2014-09-05 23:53:00	14.9			2014-08-17 17:43:00	32.8
2014-09-06 23:53:00	2.88			2014-08-17 17:48:00	33
2014-09-07 23:53:00	0.01			2014-08-17 17:53:00	32.8
2014-09-08 23:53:00	0			2014-08-17 17:58:00	32.8
2014-09-09 23:53:00	0			2014-08-17 18:03:00	32.8
2014-09-10 23:53:00	0			2014-08-17 18:08:00	32.8
2014-09-12 23:53:00	0.75			2014-08-17 18:13:00	32.8
2014-09-13 23:53:00	0.44			2014-08-17 18:18:00	32.6
2014-09-14 23:53:00	26.89			2014-08-17 18:23:00	32.8
2014-09-15 23:53:00	78			2014-08-17 18:28:00	32.6
2014-09-17 23:53:00	0.05			2014-08-17 18:33:00	32.8
2014-09-18 23:53:00	0			2014-08-17 18:38:00	32.8
2014-09-19 23:53:00	0			2014-08-17 18:43:00	32.8
2014-09-20 23:53:00	0.16			2014-08-17 18:48:00	32.6
2014-09-21 23:53:00	0.44			2014-08-17 18:53:00	33
2014-09-22 23:53:00	7.09			2014-08-17 18:58:00	32.6
2014-09-23 23:53:00	0.01			2014-08-17 19:03:00	32.8
2014-09-24 23:53:00	0.01			2014-08-17 19:08:00	32.8
2014-09-25 23:53:00	0			2014-08-17 19:13:00	32.8
2014-09-26 23:53:00	0.71			2014-08-17 19:18:00	32.8
2014-09-27 23:53:00	0.02			2014-08-17 19:23:00	32.8
2014-09-28 23:53:00	0			2014-08-17 19:28:00	32.6
2014-09-29 23:53:00	0			2014-08-17 19:33:00	32.8
2014-09-30 23:53:00	0			2014-08-17 19:38:00	32.8
2014-10-01 23:53:00	0			2014-08-17 19:43:00	32.8
2014-10-02 23:53:00	2.61			2014-08-17 19:48:00	32.8
2014-10-03 23:53:00	1.68			2014-08-17 19:53:00	32.6
2014-10-04 23:53:00	0			2014-08-17 19:58:00	32.8
2014-10-05 23:53:00	0			2014-08-17 20:03:00	32.6
2014-10-06 23:53:00	4.12			2014-08-17 20:08:00	32.8
2014-10-07 23:53:00	6.82			2014-08-17 20:13:00	32.6
2014-10-08 23:53:00	0.84			2014-08-17 20:18:00	32.6
2014-10-09 23:53:00	0.2			2014-08-17 20:23:00	32.8
2014-10-10 23:53:00	0			2014-08-17 20:28:00	32.6
2014-10-11 23:53:00	0			2014-08-17 20:33:00	32.6
2014-10-12 23:53:00	0			2014-08-17 20:38:00	32.8
2014-10-13 23:53:00	0			2014-08-17 20:43:00	32.8
2014-10-14 23:53:00	0			2014-08-17 20:48:00	33
2014-10-15 23:53:00	2.91			2014-08-17 20:53:00	35
2014-10-16 23:53:00	0.33			2014-08-17 20:58:00	36
2014-10-17 23:53:00	16.37			2014-08-17 21:03:00	36.4
2014-10-18 23:53:00	0			2014-08-17 21:08:00	36.2
2014-10-19 23:53:00	0			2014-08-17 21:13:00	36.2
2014-10-20 23:53:00	0			2014-08-17 21:18:00	36
2014-10-21 23:53:00	0			2014-08-17 21:23:00	35.6
2014-10-22 23:53:00	37.74			2014-08-17 21:28:00	35.2
2014-10-23 23:53:00	77.94			2014-08-17 21:33:00	35
2014-10-24 23:53:00	6.73			2014-08-17 21:38:00	35
2014-10-25 23:53:00	2.36			2014-08-17 21:43:00	35
2014-10-26 23:53:00	0.51			2014-08-17 21:48:00	34.6
2014-10-27 23:53:00	0.46			2014-08-17 21:53:00	34.6
2014-10-28 23:53:00	0.07			2014-08-17 21:58:00	34.4
2014-10-29 23:53:00	0			2014-08-17 22:03:00	34.4
2014-10-30 23:53:00	0			2014-08-17 22:08:00	34.2
2014-10-31 23:45:00	0			2014-08-17 22:13:00	34.2
2014-11-01 23:45:00	0			2014-08-17 22:18:00	34.2
2014-11-02 23:45:00	0			2014-08-17 22:23:00	34
2014-11-03 23:45:00	0			2014-08-17 22:28:00	34
2014-11-05 23:45:00	0			2014-08-17 22:33:00	34
2014-11-06 23:45:00	0			2014-08-17 22:38:00	33.8
2014-11-07 23:45:00	0			2014-08-17 22:43:00	33.8
2014-11-08 23:45:00	0			2014-08-17 22:48:00	33.8
2014-11-09 23:45:00	0			2014-08-17 22:53:00	33.8
2014-11-10 23:45:00	0			2014-08-17 22:58:00	34
2014-11-11 23:45:00	0			2014-08-17 23:03:00	33.8
2014-11-12 23:45:00	0.35			2014-08-17 23:08:00	33.6
2014-11-13 23:45:00	8.76			2014-08-17 23:13:00	33.6
2014-11-14 23:45:00	7.2			2014-08-17 23:18:00	33.8
2014-11-15 23:45:00	0.93			2014-08-17 23:23:00	33.4
2014-11-16 23:45:00	6.61			2014-08-17 23:28:00	33.6
2014-11-18 23:45:00	2.76			2014-08-17 23:33:00	33.6
2014-11-19 23:45:00	0.52			2014-08-17 23:38:00	33.4
2014-11-20 23:45:00	0.01			2014-08-17 23:43:00	33.6
2014-11-21 23:45:00	0			2014-08-17 23:48:00	33.2
2014-11-22 23:45:00	0.09			2014-08-17 23:53:00	33.4
2014-11-23 23:45:00	0			2014-08-17 23:58:00	33.4
2014-11-24 23:45:00	0.92			2014-08-18 00:03:00	33.4
2014-11-25 23:45:00	0.05			2014-08-18 00:08:00	33.4
2014-11-26 23:45:00	0.01			2014-08-18 00:13:00	33.4
2014-11-27 23:45:00	0			2014-08-18 00:18:00	33.2
2014-11-28 23:45:00	0			2014-08-18 00:23:00	33.4
2014-11-29 23:45:00	0.3			2014-08-18 00:28:00	33.2
2014-11-30 23:45:00	0			2014-08-18 00:33:00	33.2
2014-12-01 23:45:00	0			2014-08-18 00:38:00	33.2
2014-12-02 23:45:00	4.47			2014-08-18 00:43:00	33.2
2014-12-03 23:45:00	45.05			2014-08-18 00:48:00	33.2
2014-12-04 23:45:00	5.97			2014-08-18 00:53:00	33.2
2014-12-05 23:45:00	1.77			2014-08-18 00:58:00	33.2
2014-12-06 23:45:00	9.33			2014-08-18 01:03:00	33.2
2014-12-07 23:45:00	10.7			2014-08-18 01:08:00	33
2014-12-08 23:45:00	0.41			2014-08-18 01:13:00	33.2
2014-12-09 23:45:00	30.4			2014-08-18 01:18:00	33.2
2014-12-10 23:45:00	9.52			2014-08-18 01:23:00	33
2014-12-11 23:45:00	0.01			2014-08-18 01:28:00	33.2
2014-12-12 23:45:00	0.02			2014-08-18 01:33:00	33
2014-12-13 23:45:00	0			2014-08-18 01:38:00	33.2
2014-12-14 23:45:00	0.03			2014-08-18 01:43:00	33
2014-12-15 23:45:00	0.03			2014-08-18 01:48:00	33
2014-12-16 23:45:00	0.58			2014-08-18 01:53:00	33
2014-12-17 23:45:00	1.8			2014-08-18 01:58:00	33
2014-12-18 23:45:00	0			2014-08-18 02:03:00	33
2014-12-19 23:45:00	0.02			2014-08-18 02:08:00	33
2014-12-20 23:45:00	0			2014-08-18 02:13:00	32.8
2014-12-21 23:45:00	1.86			2014-08-18 02:18:00	33
2014-12-22 23:45:00	0.01			2014-08-18 02:23:00	32.8
2014-12-23 23:45:00	0			2014-08-18 02:28:00	33
2014-12-24 23:45:00	0			2014-08-18 02:33:00	33
2014-12-25 23:45:00	0			2014-08-18 02:38:00	32.8
2014-12-26 23:45:00	1.64			2014-08-18 02:43:00	32.8
2014-12-27 23:45:00	4.8			2014-08-18 02:48:00	32.8
2014-12-28 23:45:00	0			2014-08-18 02:53:00	32.8
2014-12-29 23:45:00	0.68			2014-08-18 02:58:00	32.8
2014-12-30 23:45:00	0			2014-08-18 03:03:00	32.8
2014-12-31 23:45:00	0			2014-08-18 03:08:00	32.8
2015-01-01 23:45:00	0			2014-08-18 03:13:00	32.6
2015-01-02 23:45:00	6.58			2014-08-18 03:18:00	32.6
2015-01-03 23:45:00	1.34			2014-08-18 03:23:00	32.6
2015-01-04 23:45:00	3.3			2014-08-18 03:28:00	32.8
2015-01-05 23:45:00	0			2014-08-18 03:33:00	32.6
2015-01-06 23:45:00	0.66			2014-08-18 03:38:00	32.8
2015-01-07 23:45:00	0			2014-08-18 03:43:00	32.8
2015-01-08 23:45:00	0			2014-08-18 03:48:00	32.8
2015-01-09 23:45:00	1.21			2014-08-18 03:53:00	32.6
2015-01-10 23:45:00	33.9			2014-08-18 03:58:00	32.8
2015-01-11 23:45:00	0.04			2014-08-18 04:03:00	32.6
2015-01-12 23:45:00	1.17			2014-08-18 04:08:00	32.6
2015-01-13 23:45:00	0.2			2014-08-18 04:13:00	32.6
2015-01-14 23:45:00	0.17			2014-08-18 04:18:00	32.8
2015-01-15 23:45:00	0.02			2014-08-18 04:23:00	32.6
2015-01-16 23:45:00	0.02			2014-08-18 04:28:00	32.8
2015-01-17 23:45:00	0			2014-08-18 04:33:00	32.6
2015-01-18 23:45:00	0.25			2014-08-18 04:38:00	32.6
2015-01-19 23:45:00	2.49			2014-08-18 04:43:00	32.6
2015-01-20 23:45:00	2.43			2014-08-18 04:48:00	32.6
2015-01-21 23:45:00	2.71			2014-08-18 04:53:00	32.6
2015-01-22 23:45:00	4.93			2014-08-18 04:58:00	32.4
2015-01-23 23:45:00	19.13			2014-08-18 05:03:00	32.6
2015-01-24 23:45:00	31.79			2014-08-18 05:08:00	32.6
2015-01-25 23:45:00	4.56			2014-08-18 05:13:00	32.6
2015-01-26 23:45:00	1.16			2014-08-18 05:18:00	32.6
2015-01-27 23:45:00	2.09			2014-08-18 05:23:00	32.6
2015-01-28 23:45:00	1.62			2014-08-18 05:28:00	32.6
2015-01-29 23:45:00	1.27			2014-08-18 05:33:00	32.6
2015-01-30 23:45:00	4.57			2014-08-18 05:38:00	32.4
2015-01-31 23:45:00	4.27			2014-08-18 05:43:00	32.6
2015-02-01 23:45:00	2.11			2014-08-18 05:48:00	32.6
2015-02-02 23:45:00	4.33			2014-08-18 05:53:00	32.6
2015-02-03 23:45:00	1.02			2014-08-18 05:58:00	32.4
2015-02-04 23:45:00	0			2014-08-18 06:03:00	32.6
2015-02-05 23:45:00	7.57			2014-08-18 06:08:00	32.4
2015-02-06 23:45:00	5			2014-08-18 06:13:00	32.4
2015-02-07 23:45:00	1.17			2014-08-18 06:18:00	32.4
2015-02-08 23:45:00	0.3			2014-08-18 06:23:00	32.4
2015-02-09 23:45:00	7.76			2014-08-18 06:28:00	32.4
2015-02-10 23:45:00	0.03			2014-08-18 06:33:00	32.4
2015-02-11 23:45:00	0			2014-08-18 06:38:00	32.4
2015-02-12 23:45:00	0.13			2014-08-18 06:43:00	32.4
2015-02-13 23:45:00	0.19			2014-08-18 06:48:00	32.4
2015-02-14 23:45:00	0.06			2014-08-18 06:53:00	32.6
2015-02-15 23:45:00	0.04			2014-08-18 06:58:00	32.4
2015-02-16 23:45:00	0			2014-08-18 07:03:00	32.4
2015-02-17 23:45:00	0			2014-08-18 07:08:00	32.4
2015-02-18 23:45:00	5.34			2014-08-18 07:13:00	32.4
2015-02-19 23:45:00	0			2014-08-18 07:18:00	32.4
2015-02-20 23:45:00	0.14			2014-08-18 07:23:00	32.4
2015-02-21 23:45:00	0.07			2014-08-18 07:28:00	32.4
2015-02-22 23:45:00	3.53			2014-08-18 07:33:00	32.4
2015-02-23 23:45:00	7.26			2014-08-18 07:38:00	32.4
2015-02-24 23:45:00	0.01			2014-08-18 07:43:00	32.4
2015-02-25 23:45:00	8.03			2014-08-18 07:48:00	32.2
2015-02-26 23:45:00	4.18			2014-08-18 07:53:00	32.4
2015-02-27 23:45:00	0.01			2014-08-18 07:58:00	32.4
2015-02-28 23:45:00	6.46			2014-08-18 08:03:00	32.2
2015-03-01 23:45:00	10.6			2014-08-18 08:08:00	32.4
2015-03-02 23:45:00	3.82			2014-08-18 08:13:00	32.2
2015-03-03 23:45:00	0.98			2014-08-18 08:18:00	32.4
2015-03-04 23:45:00	0			2014-08-18 08:23:00	32.2
2015-03-05 23:45:00	6.24			2014-08-18 08:28:00	32
2015-03-06 23:45:00	13.92			2014-08-18 08:33:00	32.2
2015-03-07 23:45:00	0.21			2014-08-18 08:38:00	32.2
2015-03-08 23:45:00	0			2014-08-18 08:43:00	32.2
2015-03-09 23:45:00	0			2014-08-18 08:48:00	32.2
2015-03-10 23:45:00	0			2014-08-18 08:53:00	32.2
2015-03-11 23:51:00	0			2014-08-18 08:58:00	32.2
2015-03-12 23:51:00	0			2014-08-18 09:03:00	32.2
2015-03-13 23:51:00	0			2014-08-18 09:08:00	32.2
2015-03-14 23:51:00	0			2014-08-18 09:13:00	32
2015-03-15 23:51:00	4.6			2014-08-18 09:18:00	32.2
2015-03-16 23:51:00	1.25			2014-08-18 09:23:00	32.2
2015-03-17 23:51:00	0			2014-08-18 09:28:00	32.2
2015-03-18 23:51:00	0			2014-08-18 09:33:00	32
2015-03-19 23:51:00	8.7			2014-08-18 09:38:00	32.2
2015-03-20 23:51:00	0.38			2014-08-18 09:43:00	32
2015-03-21 23:51:00	0.06			2014-08-18 09:48:00	32.2
2015-03-22 23:51:00	0.09			2014-08-18 09:53:00	32
2015-03-23 23:51:00	0			2014-08-18 09:58:00	32.2
2015-03-24 23:51:00	0			2014-08-18 10:03:00	32
2015-03-25 23:51:00	0.13			2014-08-18 10:08:00	32
2015-03-26 23:51:00	0			2014-08-18 10:13:00	32.4
2015-03-27 23:51:00	2.69			2014-08-18 10:18:00	32
2015-03-28 23:51:00	2.33			2014-08-18 10:23:00	32.2
2015-03-29 23:51:00	0			2014-08-18 10:28:00	32
2015-03-30 23:51:00	0.27			2014-08-18 10:33:00	32
2015-03-31 23:51:00	0.06			2014-08-18 10:38:00	32
2015-04-01 23:51:00	5.28			2014-08-18 10:43:00	32
2015-04-02 23:51:00	1.79			2014-08-18 10:48:00	32.2
2015-04-03 23:51:00	3.59			2014-08-18 10:53:00	32.8
2015-04-04 23:51:00	0.92			2014-08-18 10:58:00	32.8
2015-04-05 23:51:00	0.39			2014-08-18 11:03:00	32.4
2015-04-06 23:51:00	6.24			2014-08-18 11:08:00	32.4
2015-04-07 23:51:00	0.17			2014-08-18 11:13:00	32.4
2015-04-08 23:51:00	0.02			2014-08-18 11:18:00	32.2
2015-04-09 23:51:00	0.01			2014-08-18 11:23:00	32.2
2015-04-10 23:51:00	0			2014-08-18 11:28:00	32.2
2015-04-11 23:51:00	0			2014-08-18 11:33:00	32.4
2015-04-12 23:51:00	0			2014-08-18 11:38:00	32.2
2015-04-13 23:51:00	0			2014-08-18 11:43:00	32.2
2015-04-14 23:51:00	0.01			2014-08-18 11:48:00	32.2
2015-04-15 23:51:00	0			2014-08-18 11:53:00	32.2
2015-04-16 23:51:00	0			2014-08-18 11:58:00	32.2
2015-04-17 23:51:00	0			2014-08-18 12:03:00	32.2
2015-04-18 23:51:00	5.06			2014-08-18 12:08:00	32.2
2015-04-19 23:51:00	0			2014-08-18 12:13:00	32.2
2015-04-20 23:51:00	1			2014-08-18 12:18:00	32.2
2015-04-21 23:51:00	0.61			2014-08-18 12:23:00	32
2015-04-22 23:51:00	0			2014-08-18 12:28:00	32.2
2015-04-23 23:51:00	0			2014-08-18 12:33:00	32.2
2015-04-24 23:51:00	0			2014-08-18 12:38:00	32.2
2015-04-25 23:51:00	0.01			2014-08-18 12:43:00	32
2015-04-26 23:51:00	0			2014-08-18 12:48:00	32.2
2015-04-27 23:51:00	0			2014-08-18 12:53:00	32
2015-04-28 23:51:00	14.85			2014-08-18 12:58:00	32.2
2015-04-29 23:51:00	1.85			2014-08-18 13:03:00	32
2015-04-30 23:51:00	0			2014-08-18 13:08:00	32
2015-05-01 23:51:00	0			2014-08-18 13:13:00	32
2015-05-02 23:51:00	3.02			2014-08-18 13:18:00	32
2015-05-03 23:51:00	0.01			2014-08-18 13:23:00	32
2015-05-04 23:51:00	1.02			2014-08-18 13:28:00	32.2
2015-05-05 23:51:00	0			2014-08-18 13:33:00	32
2015-05-06 23:51:00	0.01			2014-08-18 13:38:00	32
2015-05-07 23:51:00	3.77			2014-08-18 13:43:00	32
2015-05-08 23:51:00	0			2014-08-18 13:48:00	32
2015-05-09 23:51:00	0.43			2014-08-18 13:53:00	32
2015-05-10 23:51:00	0.91			2014-08-18 13:58:00	32
2015-05-11 23:51:00	3.87			2014-08-18 14:03:00	32
2015-05-12 23:51:00	0			2014-08-18 14:08:00	32
2015-05-13 23:51:00	0			2014-08-18 14:13:00	32
2015-05-14 23:51:00	3.05			2014-08-18 14:18:00	32
2015-05-15 23:51:00	0.15			2014-08-18 14:23:00	32
2015-05-16 23:51:00	0			2014-08-18 14:28:00	32
2015-05-17 23:51:00	0			2014-08-18 14:33:00	32
2015-05-18 23:51:00	0			2014-08-18 14:38:00	32
2015-05-19 23:51:00	0			2014-08-18 14:43:00	32
2015-05-20 23:51:00	14.66			2014-08-18 14:48:00	31.8
2015-05-21 23:51:00	0			2014-08-18 14:53:00	32
2015-05-22 23:51:00	0.54			2014-08-18 14:58:00	32
2015-05-23 23:51:00	11.6			2014-08-18 15:03:00	32
2015-05-24 23:51:00	21.21			2014-08-18 15:08:00	32
2015-05-25 23:51:00	14.35			2014-08-18 15:13:00	31.8
2015-05-26 23:51:00	1.7			2014-08-18 15:18:00	32
2015-05-27 23:51:00	0			2014-08-18 15:23:00	32
2015-05-28 23:51:00	0			2014-08-18 15:28:00	31.8
2015-05-29 23:51:00	0			2014-08-18 15:33:00	32
2015-05-30 23:51:00	0			2014-08-18 15:38:00	31.8
2015-05-31 23:51:00	0			2014-08-18 15:43:00	32
2015-06-01 23:51:00	0			2014-08-18 15:48:00	31.8
2015-06-02 23:51:00	0			2014-08-18 15:53:00	32
2015-06-03 23:51:00	0			2014-08-18 15:58:00	31.8
2015-06-04 23:51:00	0.67			2014-08-18 16:03:00	32
2015-06-05 23:51:00	2.64			2014-08-18 16:08:00	31.8
2015-06-06 23:51:00	0.01			2014-08-18 16:13:00	32
2015-06-07 23:51:00	0			2014-08-18 16:18:00	31.8
2015-06-08 23:51:00	0.01			2014-08-18 16:23:00	32
2015-06-09 23:51:00	0			2014-08-18 16:28:00	31.8
2015-06-10 23:51:00	2.18			2014-08-18 16:33:00	31.8
2015-06-11 23:51:00	0.39			2014-08-18 16:38:00	31.8
2015-06-12 23:51:00	0			2014-08-18 16:43:00	31.8
2015-06-13 23:51:00	0			2014-08-18 16:48:00	32
2015-06-14 23:51:00	0			2014-08-18 16:53:00	31.8
2015-06-15 23:51:00	12.35			2014-08-18 16:58:00	31.8
2015-06-16 23:51:00	0			2014-08-18 17:03:00	31.8
2015-06-17 23:51:00	0.99			2014-08-18 17:08:00	32
2015-06-18 23:51:00	41.78			2014-08-18 17:13:00	31.8
2015-06-19 23:51:00	0.02			2014-08-18 17:18:00	31.8
2015-06-20 23:51:00	0.26			2014-08-18 17:23:00	31.8
2015-06-21 23:51:00	0			2014-08-18 17:28:00	32
2015-06-22 23:51:00	0			2014-08-18 17:33:00	31.8
2015-06-23 23:51:00	0			2014-08-18 17:38:00	31.8
2015-06-24 23:51:00	0.06			2014-08-18 17:43:00	31.8
2015-06-25 23:51:00	0.03			2014-08-18 17:48:00	31.8
2015-06-26 23:51:00	0			2014-08-18 17:53:00	32
2015-06-27 23:51:00	0.06			2014-08-18 17:58:00	31.8
2015-06-28 23:51:00	0			2014-08-18 18:03:00	31.8
2015-06-29 23:51:00	0.31			2014-08-18 18:08:00	31.8
2015-06-30 23:51:00	11.85			2014-08-18 18:13:00	31.8
2015-07-01 23:51:00	0.03			2014-08-18 18:18:00	31.8
2015-07-02 23:51:00	0			2014-08-18 18:23:00	31.8
2015-07-03 23:51:00	0.32			2014-08-18 18:28:00	31.8
2015-07-04 23:51:00	0.01			2014-08-18 18:33:00	31.8
2015-07-05 23:51:00	0			2014-08-18 18:38:00	31.8
2015-07-06 23:51:00	0			2014-08-18 18:43:00	31.8
2015-07-07 23:51:00	0			2014-08-18 18:48:00	31.8
2015-07-08 23:51:00	0			2014-08-18 18:53:00	31.8
2015-07-09 23:51:00	0			2014-08-18 18:58:00	31.8
2015-07-10 23:51:00	0			2014-08-18 19:03:00	31.8
2015-07-11 23:51:00	0			2014-08-18 19:08:00	31.8
2015-07-12 23:51:00	0			2014-08-18 19:13:00	31.8
2015-07-13 23:51:00	0			2014-08-18 19:18:00	31.8
2015-07-14 23:51:00	0			2014-08-18 19:23:00	31.8
2015-07-15 23:51:00	0.01			2014-08-18 19:28:00	31.8
2015-07-16 23:51:00	0			2014-08-18 19:33:00	31.8
2015-07-17 23:51:00	0			2014-08-18 19:38:00	31.8
2015-07-18 23:51:00	0.02			2014-08-18 19:43:00	31.8
2015-07-19 23:51:00	0			2014-08-18 19:48:00	31.8
2015-07-20 23:51:00	0.01			2014-08-18 19:53:00	31.8
2015-07-21 23:51:00	0			2014-08-18 19:58:00	31.8
2015-07-22 23:51:00	1.42			2014-08-18 20:03:00	31.8
2015-07-23 23:51:00	0			2014-08-18 20:08:00	31.6
2015-07-24 23:51:00	0			2014-08-18 20:13:00	31.6
2015-07-25 23:51:00	0			2014-08-18 20:18:00	31.8
2015-07-26 23:51:00	0			2014-08-18 20:23:00	31.8
2015-07-27 23:51:00	0			2014-08-18 20:28:00	31.8
2015-07-28 23:51:00	0			2014-08-18 20:33:00	31.8
2015-07-29 23:51:00	0			2014-08-18 20:38:00	31.8
2015-07-30 23:51:00	0			2014-08-18 20:43:00	31.8
2015-07-31 23:51:00	1.44			2014-08-18 20:48:00	31.8
2015-08-01 23:51:00	0			2014-08-18 20:53:00	31.8
2015-08-02 23:51:00	0			2014-08-18 20:58:00	31.8
2015-08-03 23:51:00	0			2014-08-18 21:03:00	31.8
2015-08-04 23:51:00	0.01			2014-08-18 21:08:00	31.8
2015-08-05 23:51:00	0			2014-08-18 21:13:00	31.8
2015-08-06 23:51:00	0			2014-08-18 21:18:00	31.8
2015-08-07 23:51:00	0			2014-08-18 21:23:00	31.6
2015-08-08 23:51:00	0			2014-08-18 21:28:00	31.6
2015-08-09 23:51:00	0			2014-08-18 21:33:00	31.8
2015-08-10 23:51:00	0			2014-08-18 21:38:00	31.8
2015-08-11 23:51:00	0			2014-08-18 21:43:00	31.8
2015-08-12 23:51:00	0			2014-08-18 21:48:00	31.8
2015-08-13 23:51:00	0.87			2014-08-18 21:53:00	31.8
2015-08-14 23:51:00	0.01			2014-08-18 21:58:00	31.8
2015-08-15 23:51:00	0			2014-08-18 22:03:00	31.8
2015-08-16 23:51:00	5.31			2014-08-18 22:08:00	31.8
2015-08-17 23:51:00	12.35			2014-08-18 22:13:00	31.8
2015-08-18 23:51:00	5.39			2014-08-18 22:18:00	31.8
2015-08-19 23:51:00	0.05			2014-08-18 22:23:00	31.6
2015-08-20 23:51:00	15.42			2014-08-18 22:28:00	31.8
2015-08-21 23:51:00	5.8			2014-08-18 22:33:00	31.8
2015-08-22 23:51:00	0.23			2014-08-18 22:38:00	31.8
2015-08-23 23:51:00	0.1			2014-08-18 22:43:00	31.8
2015-08-24 23:51:00	0			2014-08-18 22:48:00	31.8
2015-08-25 23:52:00	0			2014-08-18 22:53:00	31.8
2015-08-26 23:52:00	0			2014-08-18 22:58:00	31.8
2015-08-27 23:52:00	0			2014-08-18 23:03:00	31.8
2015-08-28 23:52:00	0.01			2014-08-18 23:08:00	31.8
2015-08-29 23:52:00	0			2014-08-18 23:13:00	31.8
2015-08-30 23:52:00	0			2014-08-18 23:18:00	31.6
2015-08-31 23:52:00	0			2014-08-18 23:23:00	31.8
[truncated: 158,638 more rows]

## Sheet: fig08.
2014				2015				2016
[truncated: 76 more rows]

## Sheet: fig09.
days	rk 2014	rk 2015	rk 2016
[truncated: 21 more rows]

[truncated: 14 more sheets: fig10., fig11., fig12., fig13a., fig13b., fig13c., fig14., fig15a., fig15b., fig17., fig18a., fig18b., fig19., fig20.]
